# Supplementary material for: Transcriptomic analysis reveals the mechanisms underlying the differential effects of caffeine, theophylline, and theobromine in regulating hepatic fat accumulation
Source: Royal Society of Chemistry journal article supplement (doi:10.1039/d4fo04001e), 2025-01-01
Supplement: d4fo04001e2.xlsx [file d4fo04001e2.xlsx]

## Sheet: Supplementary Data S1
Supplementary Data S1 Sequencing comparison data statistics of each experimental group
Sample	Raw Data		Valid Data		Valid Ratio(reads)	Q20%	Q30%	GC content%	Mapped reads	Unique Mapped reads	Multi Mapped reads	PE Mapped reads	Reads map to sense strand	Reads map to antisense strand	Non-splice reads	Splice reads
	Read	Base	Read	Base
Control1	45556466	6.83G	44100122	6.62G	96.8	99.98	98.2	50	42812999(97.08%)	32710793(74.17%)	10102206(22.91%)	38035068(86.25%)	20118433(45.62%)	20128344(45.64%)	21737871(49.29%)	18508906(41.97%)
Control2	51237208	7.69G	49612738	7.44G	96.83	99.98	98.31	49	48333700(97.42%)	37674915(75.94%)	10658785(21.48%)	43674294(88.03%)	22815591(45.99%)	22828807(46.01%)	25593224(51.59%)	20051174(40.42%)
Control3	38159640	5.72G	37317296	5.60G	97.79	99.98	98.33	49.5	36316482(97.32%)	28433958(76.20%)	7882524(21.12%)	33146052(88.82%)	17170253(46.01%)	17178668(46.03%)	18556160(49.73%)	15792761(42.32%)
Caffeine1	39287728	5.89G	38504498	5.78G	98.01	99.98	98.4	49	37519193(97.44%)	29291011(76.07%)	8228182(21.37%)	34384618(89.30%)	17701045(45.97%)	17708484(45.99%)	19291493(50.10%)	16118036(41.86%)
Caffeine2	36291402	5.44G	35553722	5.33G	97.97	99.98	98.22	49	34614018(97.36%)	27006831(75.96%)	7607187(21.40%)	31828978(89.52%)	16334363(45.94%)	16340841(45.96%)	18097519(50.90%)	14577685(41.00%)
Caffeine3	42998980	6.45G	42141458	6.32G	98.01	99.98	98.25	49	41035923(97.38%)	31887753(75.67%)	9148170(21.71%)	37606286(89.24%)	19415047(46.07%)	19424464(46.09%)	21420809(50.83%)	17418702(41.33%)
Theophylline1	37703764	5.66G	36744378	5.51G	97.46	99.98	98.2	49.5	35678440(97.10%)	27663166(75.29%)	8015274(21.81%)	32271038(87.83%)	16849691(45.86%)	16857072(45.88%)	19103804(51.99%)	14602959(39.74%)
Theophylline2	37863606	5.68G	37066456	5.56G	97.89	99.98	98.51	49	36109602(97.42%)	27997826(75.53%)	8111776(21.88%)	33046688(89.16%)	17006924(45.88%)	17012447(45.90%)	18839425(50.83%)	15179946(40.95%)
Theophylline3	52646628	7.90G	51623760	7.74G	98.06	99.98	98.16	49	50126697(97.10%)	38215915(74.03%)	11910782(23.07%)	46049634(89.20%)	23596817(45.71%)	23610959(45.74%)	26104494(50.57%)	21103282(40.88%)
Theobromine1	44291518	6.64G	43281216	6.49G	97.72	99.98	98.29	49	42148193(97.38%)	32638772(75.41%)	9509421(21.97%)	38453282(88.85%)	19803088(45.75%)	19813092(45.78%)	22338202(51.61%)	17277978(39.92%)
Theobromine2	48212636	7.23G	47031810	7.05G	97.55	99.98	98.28	49	45695632(97.16%)	35265066(74.98%)	10430566(22.18%)	41577558(88.40%)	21394750(45.49%)	21404080(45.51%)	23718796(50.43%)	19080034(40.57%)
Theobromine3	41179328	6.18G	40179430	6.03G	97.57	99.98	98.22	49	38977331(97.01%)	30388110(75.63%)	8589221(21.38%)	35434382(88.19%)	18387111(45.76%)	18398484(45.79%)	20595651(51.26%)	16189944(40.29%)

## Sheet: Supplementary Data S2
Supplementary Data S2 Analysis of transcription factor genes with differential transcription levels （p-values < 0.05）
Caffeine vs CK
gene_id	gene_name	Description	trans_type	FPKM.Caffeine1	FPKM.Caffeine2	FPKM.Caffeine3	FPKM.Control1	FPKM.Control2	FPKM.Control3	fc	log2(fc)	pval	regulation	significant
ENSMUSG00000053580	Tanc2	tetratricopeptide repeat, ankyrin repeat and coiled-coil containing 2 [Source:MGI Symbol;Acc:MGI:2444121]	protein_coding;processed_transcript	4.0538	3.88795	4.13166	0.735376	1.07239	1.37905	3.78854	1.92164	3.79508e-14	up	yes
ENSMUSG00000017615	Tnfaip1	tumor necrosis factor, alpha-induced protein 1 (endothelial) [Source:MGI Symbol;Acc:MGI:104961]	protein_coding	38.4432	37.1751	36.175	13.084	10.0198	11.4561	3.23476	1.69366	1.2479e-12	up	yes
ENSMUSG00000053012	Krcc1	lysine-rich coiled-coil 1 [Source:MGI Symbol;Acc:MGI:1889377]	protein_coding	36.9939	35.6794	39.0408	13.0072	9.3274	9.70846	3.48637	1.80172	5.03278e-12	up	yes
ENSMUSG00000086782	E130102H24Rik	RIKEN cDNA E130102H24 gene [Source:MGI Symbol;Acc:MGI:1925116]	lincRNA	1.74359	0.0001	2.21614	0.0001	0.0001	0.0001	13199.5	13.6882	5.45596e-08	up	yes
ENSMUSG00000072676	Tmem254a	transmembrane protein 254a [Source:MGI Symbol;Acc:MGI:1196450]	protein_coding;retained_intron;nonsense_mediated_decay	0.0001	0.531818	0.706045	0.0001	0.0001	0.0001	4126.55	12.0107	1.26315e-07	up	yes
ENSMUSG00000041966	Dcaf17	DDB1 and CUL4 associated factor 17 [Source:MGI Symbol;Acc:MGI:1923013]	protein_coding;nonsense_mediated_decay;processed_transcript	1.41571	1.1525	1.24148	0.323784	0.313994	0.526558	3.27199	1.71017	2.76994e-07	up	yes
ENSMUSG00000058838	Rps27a-ps2	ribosomal protein S27A, pseudogene 2 [Source:MGI Symbol;Acc:MGI:3643614]	processed_pseudogene	215.346	463.192	210.264	103.867	57.806	93.1367	3.48811	1.80245	3.89764e-07	up	yes
ENSMUSG00000029106	Add1	adducin 1 (alpha) [Source:MGI Symbol;Acc:MGI:87918]	protein_coding;retained_intron;processed_transcript	30.0323	28.7773	29.0651	13.8575	14.8332	15.4761	1.98961	0.992486	4.39202e-06	up	no
ENSMUSG00000098374	Gm28043	predicted gene, 28043 [Source:MGI Symbol;Acc:MGI:5547779]	nonsense_mediated_decay	4.54583	4.09606	4.06131	1.52054	1.84326	2.2629	2.25766	1.17483	6.55482e-06	up	yes
ENSMUSG00000037652	Phc3	polyhomeotic 3 [Source:MGI Symbol;Acc:MGI:2181434]	protein_coding;nonsense_mediated_decay;retained_intron	0.624009	3.00521	3.22634	0.368865	0.56202	0.662529	4.30244	2.10515	7.05305e-06	up	yes
ENSMUSG00000040123	Zmym5	zinc finger, MYM-type 5 [Source:MGI Symbol;Acc:MGI:3041170]	nonsense_mediated_decay;protein_coding;processed_transcript	4.63431	5.86346	4.79118	1.18601	2.31577	2.71519	2.45923	1.29821	9.9128e-06	up	yes
ENSMUSG00000036160	Surf6	surfeit gene 6 [Source:MGI Symbol;Acc:MGI:98447]	processed_transcript;protein_coding	4.33655	5.06868	5.67554	1.82671	2.5172	1.91721	2.40864	1.26822	1.05061e-05	up	yes
ENSMUSG00000005615	Pcyt1a	phosphate cytidylyltransferase 1, choline, alpha isoform [Source:MGI Symbol;Acc:MGI:88557]	protein_coding;retained_intron	3.44183	13.4986	12.889	2.84418	3.10267	3.16505	3.27368	1.71091	2.024e-05	up	yes
ENSMUSG00000046897	Zfp740	zinc finger protein 740 [Source:MGI Symbol;Acc:MGI:1915994]	retained_intron;protein_coding;processed_transcript	13.5118	3.24548	12.7436	2.79223	3.24862	2.7506	3.35564	1.74659	3.3292e-05	up	yes
ENSMUSG00000035274	Tpbg	trophoblast glycoprotein [Source:MGI Symbol;Acc:MGI:1341264]	protein_coding;processed_transcript	6.3763	19.3495	19.8616	6.64838	2.47683	2.74156	3.84159	1.9417	6.49678e-05	up	yes
ENSMUSG00000022641	Bbx	bobby sox HMG box containing [Source:MGI Symbol;Acc:MGI:1917758]	protein_coding;retained_intron;processed_transcript	2.33021	2.77953	2.10558	0.95721	1.13982	1.4409	2.03942	1.02816	8.12176e-05	up	yes
ENSMUSG00000036819	Jmjd4	jumonji domain containing 4 [Source:MGI Symbol;Acc:MGI:2144404]	protein_coding;nonsense_mediated_decay;retained_intron	1.6196	1.69386	2.15575	0.536309	0.974025	0.789699	2.37788	1.24968	9.50322e-05	up	yes
ENSMUSG00000078151	Gm12226	predicted pseudogene 12226 [Source:MGI Symbol;Acc:MGI:3649742]	processed_pseudogene	4.052	4.07848	0.19342	0.426398	0.122568	0.214367	10.9047	3.44687	0.000105152	up	yes
ENSMUSG00000006010	Odr4	odr4 GPCR localization factor homolog [Source:MGI Symbol;Acc:MGI:2385108]	protein_coding;processed_transcript;retained_intron;nonsense_mediated_decay	6.19139	15.2292	15.7207	2.18254	5.04945	5.99019	2.80901	1.49006	0.000109282	up	yes
ENSMUSG00000047881	Rell1	RELT-like 1 [Source:MGI Symbol;Acc:MGI:2140767]	protein_coding;nonsense_mediated_decay;processed_transcript;retained_intron	20.1644	20.6013	18.5056	12.1907	5.64719	6.23709	2.46194	1.2998	0.000114947	up	yes
ENSMUSG00000080832	M6pr-ps	mannose-6-phosphate receptor, pseudogene [Source:MGI Symbol;Acc:MGI:96905]	processed_pseudogene	1.55415	0.91856	1.11644	0.124234	0.40508	0.366556	4.00632	2.00228	0.000157667	up	yes
ENSMUSG00000037225	Fgf2	fibroblast growth factor 2 [Source:MGI Symbol;Acc:MGI:95516]	protein_coding;retained_intron;processed_transcript	2.98199	4.00135	4.3406	0.579703	1.96234	1.72646	2.6529	1.40757	0.000169787	up	yes
ENSMUSG00000027651	Rprd1b	regulation of nuclear pre-mRNA domain containing 1B [Source:MGI Symbol;Acc:MGI:1917720]	protein_coding;processed_transcript;retained_intron	5.89634	1.22332	6.58617	1.00314	1.35946	1.69147	3.38076	1.75735	0.00021005	up	yes
ENSMUSG00000034480	Diaph2	diaphanous related formin 2 [Source:MGI Symbol;Acc:MGI:1858500]	protein_coding;retained_intron;processed_transcript	1.82159	1.99245	2.02557	1.11335	0.774779	0.7342	2.22688	1.15502	0.00023683	up	yes
ENSMUSG00000089991	Gm16332	predicted gene 16332 [Source:MGI Symbol;Acc:MGI:3840155]	unprocessed_pseudogene	0.929698	0.75982	0.66006	0.083231	0.352802	0.231192	3.52142	1.81616	0.000267956	up	yes
ENSMUSG00000052293	Taf9	TATA-box binding protein associated factor 9 [Source:MGI Symbol;Acc:MGI:1888697]	protein_coding	2.21369	5.85832	2.58902	0.979064	0.950816	1.54501	3.06802	1.61731	0.000270437	up	yes
ENSMUSG00000044757	Gm6430	predicted gene 6430 [Source:MGI Symbol;Acc:MGI:3648857]	processed_pseudogene	37.1727	1.23837	1.41067	0.747192	0.954333	1.66711	11.8213	3.56332	0.00029753	up	yes
ENSMUSG00000032307	Ube2q2	ubiquitin-conjugating enzyme E2Q family member 2 [Source:MGI Symbol;Acc:MGI:2388672]	protein_coding;retained_intron	9.11968	8.13685	7.28265	2.4303	4.63359	5.18687	2.00307	1.00222	0.000477508	up	yes
ENSMUSG00000063953	Amd2	S-adenosylmethionine decarboxylase 2 [Source:MGI Symbol;Acc:MGI:1333111]	protein_coding	4.99254	1.39431	3.02957	0.748538	1.3482	1.19937	2.85683	1.51441	0.000649421	up	yes
ENSMUSG00000093979	Gm2237	predicted gene 2237 [Source:MGI Symbol;Acc:MGI:3780407]	protein_coding	0.588878	0.625506	0.609513	0.201459	0.238026	0.171427	2.98553	1.57799	0.000663761	up	yes
ENSMUSG00000027398	Il1b	interleukin 1 beta [Source:MGI Symbol;Acc:MGI:96543]	protein_coding;processed_transcript;retained_intron	1.30775	1.31298	1.27249	0.404615	0.540496	0.583414	2.54705	1.34882	0.000787875	up	yes
ENSMUSG00000020053	Igf1	insulin-like growth factor 1 [Source:MGI Symbol;Acc:MGI:96432]	protein_coding	16.9663	17.0664	18.437	5.98222	11.9397	10.9994	1.81422	0.859347	0.000856861	up	no
ENSMUSG00000081953	Gm12435	predicted gene 12435 [Source:MGI Symbol;Acc:MGI:3651950]	processed_pseudogene	50.7609	1.92934	2.02171	2.36719	1.53876	2.22797	8.91957	3.15697	0.000887992	up	yes
ENSMUSG00000052419	2610001J05Rik	RIKEN cDNA 2610001J05 gene [Source:MGI Symbol;Acc:MGI:1913770]	protein_coding	11.2434	11.902	3.88609	3.72789	4.31311	3.25265	2.39351	1.25913	0.000916937	up	yes
ENSMUSG00000048424	Ranbp3l	RAN binding protein 3-like [Source:MGI Symbol;Acc:MGI:2444654]	protein_coding;retained_intron;processed_transcript	0.883708	0.90414	1.06589	0.238116	0.518264	0.451204	2.36318	1.24073	0.000939655	up	yes
ENSMUSG00000032712	Resf1	retroelement silencing factor 1 [Source:MGI Symbol;Acc:MGI:1914496]	protein_coding;retained_intron	9.34171	9.85355	10.3794	1.72939	5.77394	5.98268	2.19298	1.1329	0.00100638	up	yes
ENSMUSG00000026754	Golga1	golgi autoantigen, golgin subfamily a, 1 [Source:MGI Symbol;Acc:MGI:1924149]	protein_coding;retained_intron;processed_transcript;nonsense_mediated_decay	6.85389	6.23934	6.87811	2.48922	4.05276	4.41359	1.82294	0.866267	0.00109571	up	no
ENSMUSG00000112847	Gm47573	predicted gene, 47573 [Source:MGI Symbol;Acc:MGI:6096604]	TEC	0.35614	0.242796	0.447703	0.034962	0.125247	0.138392	3.50514	1.80947	0.0011098	up	yes
ENSMUSG00000022812	Gsk3b	glycogen synthase kinase 3 beta [Source:MGI Symbol;Acc:MGI:1861437]	protein_coding;retained_intron;processed_transcript	9.82491	8.67983	2.8435	1.98985	2.49587	4.21631	2.45325	1.29469	0.001256	up	yes
ENSMUSG00000075224	Lrrc55	leucine rich repeat containing 55 [Source:MGI Symbol;Acc:MGI:2685197]	protein_coding;nonsense_mediated_decay	0.265174	0.203548	0.196447	0.0529288	0.109624	0.0684518	2.87946	1.5258	0.00126639	up	yes
ENSMUSG00000069622	Gm10273	predicted pseudogene 10273 [Source:MGI Symbol;Acc:MGI:3704362]	protein_coding	0.602814	12.4553	1.00006	0.65032	0.542549	0.775807	7.14092	2.83611	0.00130353	up	yes
ENSMUSG00000033306	Lpp	LIM domain containing preferred translocation partner in lipoma [Source:MGI Symbol;Acc:MGI:2441849]	protein_coding;retained_intron;nonsense_mediated_decay	4.06092	3.54118	4.29261	2.48338	1.60078	0.646538	2.51437	1.3302	0.00147988	up	yes
ENSMUSG00000021390	Ogn	osteoglycin [Source:MGI Symbol;Acc:MGI:109278]	protein_coding	170.99	163.023	174.766	34.9193	106.064	112.021	2.01094	1.00787	0.00190992	up	yes
ENSMUSG00000042567	Nek10	NIMA (never in mitosis gene a)- related kinase 10 [Source:MGI Symbol;Acc:MGI:2685128]	protein_coding;nonsense_mediated_decay;retained_intron;processed_transcript	0.0989667	0.0741178	0.134833	0.0322488	0.0424504	0.0342237	2.82693	1.49924	0.0019857	up	yes
ENSMUSG00000073079	Srp54a	signal recognition particle 54A [Source:MGI Symbol;Acc:MGI:1346087]	protein_coding;retained_intron;processed_transcript	13.3928	14.8486	10.2976	5.89766	7.73213	8.92501	1.70868	0.772885	0.00199458	up	no
ENSMUSG00000041679	Lrrc29	leucine rich repeat containing 29 [Source:MGI Symbol;Acc:MGI:2443262]	protein_coding;nonsense_mediated_decay	0.60671	0.531302	0.334688	0.169407	0.142065	0.236785	2.68615	1.42554	0.00208646	up	yes
ENSMUSG00000033228	Scaf11	SR-related CTD-associated factor 11 [Source:MGI Symbol;Acc:MGI:1919443]	protein_coding;nonsense_mediated_decay;processed_transcript	10.6585	11.2777	10.8441	4.43032	7.31463	7.71179	1.68478	0.752558	0.00211255	up	no
ENSMUSG00000029675	Eln	elastin [Source:MGI Symbol;Acc:MGI:95317]	protein_coding;retained_intron;nonsense_mediated_decay	0.134385	0.187347	0.160644	0.02852	0.0772225	0.060494	2.90175	1.53692	0.00214461	up	yes
ENSMUSG00000044258	Ctla2a	cytotoxic T lymphocyte-associated protein 2 alpha [Source:MGI Symbol;Acc:MGI:88554]	processed_transcript;retained_intron;protein_coding;nonsense_mediated_decay	13.3785	13.0163	11.4809	5.49955	7.39138	8.77286	1.74834	0.805988	0.00254105	up	no
ENSMUSG00000085584	Rtl9	retrotransposon Gag like 9 [Source:MGI Symbol;Acc:MGI:2685231]	protein_coding	0.236109	0.364407	0.295872	0.097595	0.107208	0.142793	2.57882	1.36671	0.00354465	up	yes
ENSMUSG00000039219	Arid4b	AT rich interactive domain 4B (RBP1-like) [Source:MGI Symbol;Acc:MGI:2137512]	protein_coding;retained_intron;nonsense_mediated_decay;processed_transcript	2.33069	2.41286	2.63001	0.427662	1.32442	1.73776	2.11286	1.0792	0.00360049	up	yes
ENSMUSG00000078894	2210418O10Rik	RIKEN cDNA 2210418O10 gene [Source:MGI Symbol;Acc:MGI:1924208]	protein_coding	2.49446	0.918859	0.805406	0.0941906	0.415921	0.717172	3.43745	1.78134	0.00361681	up	yes
ENSMUSG00000060149	BC002059	cDNA sequence BC002059 [Source:MGI Symbol;Acc:MGI:2384864]	lincRNA	2.63523	2.22426	1.32587	0.65343	0.981721	1.05677	2.29775	1.20022	0.0038619	up	yes
ENSMUSG00000058258	Idi1	isopentenyl-diphosphate delta isomerase [Source:MGI Symbol;Acc:MGI:2442264]	protein_coding;retained_intron	15.9862	15.0885	8.54521	7.42835	8.04438	6.27699	1.82163	0.865229	0.00426681	up	no
ENSMUSG00000040167	Ikzf5	IKAROS family zinc finger 5 [Source:MGI Symbol;Acc:MGI:1914393]	protein_coding;retained_intron	3.31882	2.61874	3.71796	1.55967	2.20153	1.52759	1.82566	0.868415	0.00445849	up	no
ENSMUSG00000056412	Gm12396	predicted gene 12396 [Source:MGI Symbol;Acc:MGI:3649201]	processed_pseudogene	4.322	4.82713	6.21444	1.91124	1.71701	2.7184	2.42074	1.27545	0.00495433	up	yes
ENSMUSG00000014813	Stc1	stanniocalcin 1 [Source:MGI Symbol;Acc:MGI:109131]	protein_coding	0.532924	0.866205	0.777761	0.219403	0.451036	0.273649	2.30581	1.20528	0.00525331	up	yes
ENSMUSG00000044566	Cage1	cancer antigen 1 [Source:MGI Symbol;Acc:MGI:1918463]	protein_coding	0.346487	0.554241	0.744693	0.148152	0.235207	0.301707	2.40185	1.26414	0.00526889	up	yes
ENSMUSG00000116138	C030006K11Rik	RIKEN cDNA C030006K11 gene [Source:MGI Symbol;Acc:MGI:1925941]	protein_coding;retained_intron;processed_transcript;nonsense_mediated_decay	7.16457	8.06337	6.18523	4.37057	3.70407	3.73442	1.81328	0.858604	0.00551747	up	no
ENSMUSG00000080896	Gm14567	predicted gene 14567 [Source:MGI Symbol;Acc:MGI:3705732]	processed_pseudogene	2.57251	16.2789	6.75704	1.79597	3.86545	1.68517	3.48576	1.80147	0.00569986	up	yes
ENSMUSG00000019929	Dcn	decorin [Source:MGI Symbol;Acc:MGI:94872]	protein_coding;retained_intron	39.0961	41.0463	39.0084	15.9788	27.9786	29.8059	1.61531	0.691815	0.00582458	up	no
ENSMUSG00000117694	Gm28285	novel protein, identical to matrin 3 (Matr3)	protein_coding;processed_transcript	5.56569	0.650731	1.54049	0.808395	0.237111	0.936203	3.91425	1.96874	0.0058369	up	yes
ENSMUSG00000074415	3110039I08Rik	RIKEN cDNA 3110039I08 gene [Source:MGI Symbol;Acc:MGI:1920394]	retained_intron;lincRNA;processed_transcript	1.84104	2.60049	2.28287	0.672252	1.96105	0.785407	1.96694	0.975953	0.00603101	up	no
ENSMUSG00000032745	Gpbp1	GC-rich promoter binding protein 1 [Source:MGI Symbol;Acc:MGI:1920524]	protein_coding;nonsense_mediated_decay;processed_transcript;retained_intron	20.7021	19.7767	18.5566	9.80592	14.0376	13.7598	1.56995	0.650717	0.00603926	up	no
ENSMUSG00000038503	Mesd	mesoderm development LRP chaperone [Source:MGI Symbol;Acc:MGI:1891421]	protein_coding;processed_transcript;nonsense_mediated_decay;retained_intron	15.0809	15.5624	4.18441	5.12705	4.91641	6.21224	2.14249	1.09929	0.00618393	up	yes
ENSMUSG00000031342	Gpm6b	glycoprotein m6b [Source:MGI Symbol;Acc:MGI:107672]	protein_coding;retained_intron;nonsense_mediated_decay	1.93195	2.15468	2.60089	0.574006	0.717355	1.81155	2.15524	1.10785	0.00625247	up	yes
ENSMUSG00000030016	Zfp638	zinc finger protein 638 [Source:MGI Symbol;Acc:MGI:1203484]	protein_coding;retained_intron;processed_transcript;nonsense_mediated_decay	2.74116	2.83442	1.93563	0.555461	1.36174	1.91502	1.96001	0.970864	0.0064439	up	no
ENSMUSG00000027285	Haus2	HAUS augmin-like complex, subunit 2 [Source:MGI Symbol;Acc:MGI:1913546]	protein_coding;nonsense_mediated_decay	4.71222	6.78276	6.63968	3.19554	3.79516	3.39129	1.74674	0.804666	0.00665404	up	no
ENSMUSG00000040997	Abhd4	abhydrolase domain containing 4 [Source:MGI Symbol;Acc:MGI:1915938]	protein_coding;nonsense_mediated_decay;retained_intron	43.1129	43.0729	39.0964	19.2774	35.8906	20.1142	1.66417	0.734802	0.00674955	up	no
ENSMUSG00000031309	Rps6ka3	ribosomal protein S6 kinase polypeptide 3 [Source:MGI Symbol;Acc:MGI:104557]	protein_coding;processed_transcript;retained_intron	6.30269	4.00391	6.69321	2.71457	3.91408	3.45319	1.68618	0.753759	0.00678317	up	no
ENSMUSG00000030162	Olr1	oxidized low density lipoprotein (lectin-like) receptor 1 [Source:MGI Symbol;Acc:MGI:1261434]	protein_coding	1.23482	1.14806	0.89093	0.183562	0.609368	0.587718	2.37122	1.24563	0.00720345	up	yes
ENSMUSG00000050188	Lsm10	U7 snRNP-specific Sm-like protein LSM10 [Source:MGI Symbol;Acc:MGI:2151045]	protein_coding	16.2579	13.3423	15.7573	8.70353	8.33921	8.88076	1.74967	0.807082	0.0073083	up	no
ENSMUSG00000113836	Gm3325	predicted gene 3325 [Source:MGI Symbol;Acc:MGI:3781503]	processed_transcript;transcribed_processed_pseudogene	1.00574	0.369796	0.864019	0.0613615	0.404431	0.287093	2.97462	1.57271	0.00767767	up	yes
ENSMUSG00000021388	Aspn	asporin [Source:MGI Symbol;Acc:MGI:1913945]	protein_coding	2.60032	2.69896	3.09794	0.603678	2.12024	1.11198	2.18912	1.13035	0.00843155	up	yes
ENSMUSG00000078771	Evi2a	ecotropic viral integration site 2a [Source:MGI Symbol;Acc:MGI:95458]	protein_coding;processed_transcript	10.0263	4.43868	9.68242	2.18301	4.84048	4.94018	2.01839	1.01321	0.00851662	up	yes
ENSMUSG00000019990	Pde7b	phosphodiesterase 7B [Source:MGI Symbol;Acc:MGI:1352752]	protein_coding;retained_intron;nonsense_mediated_decay	0.106305	0.113496	0.0876915	0.033892	0.0322077	0.0606124	2.4267	1.27899	0.00853579	up	yes
ENSMUSG00000022228	Zscan26	zinc finger and SCAN domain containing 26 [Source:MGI Symbol;Acc:MGI:3531417]	protein_coding	10.6433	10.9607	12.1061	3.10405	2.35013	10.0654	2.17211	1.1191	0.00856466	up	yes
ENSMUSG00000049421	Zfp260	zinc finger protein 260 [Source:MGI Symbol;Acc:MGI:1347071]	protein_coding;retained_intron;processed_transcript	3.27645	0.882975	0.508025	0.478258	0.51928	0.658608	2.81826	1.4948	0.00857413	up	yes
ENSMUSG00000041482	Piezo2	piezo-type mechanosensitive ion channel component 2 [Source:MGI Symbol;Acc:MGI:1918781]	protein_coding;nonsense_mediated_decay;processed_transcript;retained_intron	3.23672	3.05267	3.3196	1.60246	2.17215	2.37973	1.56134	0.642781	0.00861577	up	no
ENSMUSG00000033355	Rtp4	receptor transporter protein 4 [Source:MGI Symbol;Acc:MGI:1915025]	protein_coding	0.828961	0.636195	0.95716	0.115973	0.380602	0.4688	2.5092	1.32722	0.00873531	up	yes
ENSMUSG00000027959	Sass6	SAS-6 centriolar assembly protein [Source:MGI Symbol;Acc:MGI:1920026]	protein_coding;nonsense_mediated_decay;processed_transcript;retained_intron	0.750257	0.634658	0.708067	0.37181	0.298719	0.368035	2.01527	1.01097	0.00889328	up	yes
ENSMUSG00000058291	Zfp68	zinc finger protein 68 [Source:MGI Symbol;Acc:MGI:1344427]	protein_coding;processed_transcript;retained_intron	3.07832	5.77762	3.90415	1.9137	2.35718	3.11096	1.72858	0.789587	0.00898132	up	no
ENSMUSG00000082809	Gm14150	predicted gene 14150 [Source:MGI Symbol;Acc:MGI:3651006]	processed_pseudogene	59.4272	7.76983	9.1397	11.1992	6.17061	6.52613	3.19455	1.67561	0.00907559	up	yes
ENSMUSG00000107145	Gm43442	predicted gene 43442 [Source:MGI Symbol;Acc:MGI:5663579]	processed_pseudogene	0.918413	3.39334	3.85216	1.42282	0.472125	0.526925	3.37092	1.75314	0.00909685	up	yes
ENSMUSG00000048978	Nrsn1	neurensin 1 [Source:MGI Symbol;Acc:MGI:894662]	protein_coding;processed_transcript	0.577788	0.969034	0.643975	0.431891	0.232043	0.2442	2.41242	1.27048	0.00928026	up	yes
ENSMUSG00000096544	Gm4617	predicted pseudogene 4617 [Source:MGI Symbol;Acc:MGI:3704225]	processed_pseudogene	60.2123	50.5756	58.6484	26.1387	33.7096	40.5883	1.687	0.754458	0.00969126	up	no
ENSMUSG00000111291	Gm48604	predicted gene, 48604 [Source:MGI Symbol;Acc:MGI:6098186]	lincRNA	2.52055	2.78765	1.42559	0.179146	1.20486	1.12091	2.68824	1.42666	0.00991171	up	yes
ENSMUSG00000021820	Camk2g	calcium/calmodulin-dependent protein kinase II gamma [Source:MGI Symbol;Acc:MGI:88259]	protein_coding;retained_intron;nonsense_mediated_decay;processed_transcript	13.0851	18.4508	18.0417	8.96705	12.0254	10.8362	1.55764	0.63936	0.0102131	up	no
ENSMUSG00000094365	Gm21982	predicted gene 21982 [Source:MGI Symbol;Acc:MGI:5439451]	retained_intron	3.15738	0.161273	0.27724	0.403222	0.159453	0.05287	5.8418	2.54641	0.0108553	up	yes
ENSMUSG00000084799	Ino80dos	INO80 complex subunit D, opposite strand [Source:MGI Symbol;Acc:MGI:3651861]	lincRNA	0.3912	0.608282	0.57011	0.29664	0.112319	0.201011	2.57323	1.36358	0.0109772	up	yes
ENSMUSG00000018750	Zbtb4	zinc finger and BTB domain containing 4 [Source:MGI Symbol;Acc:MGI:1922830]	protein_coding	9.06782	9.0081	9.15692	2.75629	8.46664	2.16956	2.03344	1.02392	0.0110204	up	yes
ENSMUSG00000007655	Cav1	caveolin 1, caveolae protein [Source:MGI Symbol;Acc:MGI:102709]	protein_coding;processed_transcript;nonsense_mediated_decay	12.4093	22.8889	13.8621	8.30849	7.03841	12.8099	1.74595	0.804011	0.0111731	up	no
ENSMUSG00000060477	Irak2	interleukin-1 receptor-associated kinase 2 [Source:MGI Symbol;Acc:MGI:2429603]	protein_coding;retained_intron;processed_transcript;nonsense_mediated_decay	7.3262	2.69079	7.72343	2.05823	2.97452	3.99744	1.96457	0.974211	0.0115776	up	no
ENSMUSG00000057895	Zfp105	zinc finger protein 105 [Source:MGI Symbol;Acc:MGI:1277119]	protein_coding	0.337088	0.654318	0.632396	0.0436349	0.226884	0.307347	2.81	1.49057	0.0116156	up	yes
ENSMUSG00000039997	Ifi203	interferon activated gene 203 [Source:MGI Symbol;Acc:MGI:96428]	protein_coding;processed_transcript;retained_intron	2.67783	1.55894	2.4134	1.02827	1.26499	1.48579	1.75974	0.815366	0.0116909	up	no
ENSMUSG00000034593	Myo5a	myosin VA [Source:MGI Symbol;Acc:MGI:105976]	protein_coding;retained_intron;processed_transcript;nonsense_mediated_decay	8.10201	8.49515	8.91775	4.0567	7.44767	4.66653	1.57783	0.65794	0.0119251	up	no
ENSMUSG00000057137	Tmem140	transmembrane protein 140 [Source:MGI Symbol;Acc:MGI:1915737]	protein_coding;processed_transcript	6.58915	9.65105	7.83202	3.88303	2.9749	6.85603	1.75531	0.811724	0.012214	up	no
ENSMUSG00000037514	Pank2	pantothenate kinase 2 [Source:MGI Symbol;Acc:MGI:1921700]	protein_coding;nonsense_mediated_decay;processed_transcript	6.9261	6.94433	7.82543	5.4982	3.94051	3.12334	1.7271	0.788349	0.0122791	up	no
ENSMUSG00000039985	Sinhcaf	SIN3-HDAC complex associated factor [Source:MGI Symbol;Acc:MGI:1929091]	protein_coding;nonsense_mediated_decay;retained_intron;processed_transcript	3.5411	2.92512	3.45797	1.30411	0.998049	2.78454	1.95101	0.964219	0.0125026	up	no
ENSMUSG00000068130	Zfp442	zinc finger protein 442 [Source:MGI Symbol;Acc:MGI:3651999]	protein_coding	0.694082	0.652501	0.667893	0.15944	0.507118	0.179561	2.38084	1.25147	0.0125892	up	yes
ENSMUSG00000082662	Gm15516	predicted gene 15516 [Source:MGI Symbol;Acc:MGI:3782963]	processed_pseudogene	23.4389	0.601487	54.4009	5.21468	3.23713	7.82824	4.81825	2.26851	0.012881	up	yes
ENSMUSG00000097403	9230116N13Rik	RIKEN cDNA 9230116N13 gene [Source:MGI Symbol;Acc:MGI:2443255]	retained_intron;antisense	0.181484	0.257179	0.30278	0.0945956	0.110756	0.114321	2.31938	1.21374	0.0132634	up	yes
ENSMUSG00000059713	Rcan3	regulator of calcineurin 3 [Source:MGI Symbol;Acc:MGI:1858220]	protein_coding	4.67718	5.10348	4.77962	0.86545	0.731431	4.37172	2.43948	1.28657	0.0137795	up	yes
ENSMUSG00000027200	Sema6d	sema domain, transmembrane domain (TM), and cytoplasmic domain, (semaphorin) 6D [Source:MGI Symbol;Acc:MGI:2387661]	protein_coding;processed_transcript;retained_intron	0.57474	0.525895	0.695397	0.238325	0.414988	0.308901	1.86656	0.900384	0.0138556	up	no
ENSMUSG00000074794	Arrdc3	arrestin domain containing 3 [Source:MGI Symbol;Acc:MGI:2145242]	protein_coding;nonsense_mediated_decay;retained_intron	6.68301	6.26469	6.44709	3.50168	2.88695	5.4663	1.63601	0.710181	0.0139278	up	no
ENSMUSG00000030029	Lrig1	leucine-rich repeats and immunoglobulin-like domains 1 [Source:MGI Symbol;Acc:MGI:107935]	nonsense_mediated_decay;protein_coding;processed_transcript	10.9999	11.0694	10.9656	7.21976	5.12794	8.43569	1.58948	0.668557	0.0139941	up	no
ENSMUSG00000001833	Sept7	septin 7 [Source:MGI Symbol;Acc:MGI:1335094]	protein_coding;retained_intron;processed_transcript	19.4374	13.313	19.5233	6.64466	11.972	13.8661	1.60927	0.686407	0.0143574	up	no
ENSMUSG00000089945	Pakap	paralemmin A kinase anchor protein [Source:MGI Symbol;Acc:MGI:5141924]	protein_coding;nonsense_mediated_decay	2.12108	1.48486	2.19836	0.925928	0.80906	1.52045	1.78295	0.834269	0.0144189	up	no
ENSMUSG00000014773	Dll1	delta like canonical Notch ligand 1 [Source:MGI Symbol;Acc:MGI:104659]	protein_coding;retained_intron;processed_transcript	4.89104	4.74571	4.72896	2.08052	3.31342	3.39357	1.63479	0.709103	0.014431	up	no
ENSMUSG00000101523	Gm10031	predicted pseudogene 10031 [Source:MGI Symbol;Acc:MGI:3704198]	protein_coding	9.38525	11.2996	7.30591	3.94677	5.15855	7.57569	1.678	0.746744	0.0145396	up	no
ENSMUSG00000104443	4932442E05Rik	RIKEN cDNA 4932442E05 gene [Source:MGI Symbol;Acc:MGI:1921665]	TEC	0.553071	0.640364	0.556766	0.142834	0.27149	0.389389	2.17764	1.12277	0.0145581	up	yes
ENSMUSG00000109015	Gm31024	predicted gene, 31024 [Source:MGI Symbol;Acc:MGI:5590183]	TEC	0.428002	0.535194	0.143625	0.042034	0.159542	0.189221	2.83221	1.50193	0.0145989	up	yes
ENSMUSG00000042254	Cilp	cartilage intermediate layer protein, nucleotide pyrophosphohydrolase [Source:MGI Symbol;Acc:MGI:2444507]	nonsense_mediated_decay;protein_coding	187.967	173.445	191.505	110.924	133.987	132.442	1.46525	0.551151	0.0146296	up	no
ENSMUSG00000040599	Mis12	MIS12 kinetochore complex component [Source:MGI Symbol;Acc:MGI:1914389]	protein_coding	13.8087	2.83033	14.4731	6.85644	1.65932	1.7583	3.02823	1.59847	0.014646	up	yes
ENSMUSG00000093847	Gm5039	predicted gene 5039 [Source:MGI Symbol;Acc:MGI:3648085]	protein_coding	1.11286	0.885938	1.27146	0.180498	0.782496	0.437614	2.33489	1.22336	0.0151439	up	yes
ENSMUSG00000061371	Zfp873	zinc finger protein 873 [Source:MGI Symbol;Acc:MGI:3040689]	protein_coding;retained_intron;processed_transcript	1.78964	1.81	1.70646	0.515997	1.39572	0.74348	1.99838	0.99883	0.0151882	up	no
ENSMUSG00000020027	Socs2	suppressor of cytokine signaling 2 [Source:MGI Symbol;Acc:MGI:1201787]	protein_coding;nonsense_mediated_decay;retained_intron;processed_transcript	7.41406	6.90329	7.9623	3.96723	6.11114	4.57238	1.52072	0.604751	0.0154111	up	no
ENSMUSG00000025764	Jade1	jade family PHD finger 1 [Source:MGI Symbol;Acc:MGI:1925835]	protein_coding;retained_intron;processed_transcript	6.42926	2.35395	5.59405	1.56048	1.79215	3.93865	1.97184	0.979542	0.0154265	up	no
ENSMUSG00000091900	Gm4353	predicted gene 4353 [Source:MGI Symbol;Acc:MGI:3782538]	protein_coding	0.937327	1.6217	1.89391	0.876811	0.617115	0.486625	2.24833	1.16886	0.0158866	up	yes
ENSMUSG00000028248	Pnisr	PNN interacting serine/arginine-rich [Source:MGI Symbol;Acc:MGI:1913875]	protein_coding;processed_transcript;nonsense_mediated_decay	7.10807	5.67193	6.82119	2.43458	3.86638	5.80448	1.6192	0.695285	0.0158879	up	no
ENSMUSG00000029634	Rnf6	ring finger protein (C3H2C3 type) 6 [Source:MGI Symbol;Acc:MGI:1921382]	protein_coding;processed_transcript	15.6753	17.1195	18.5819	3.45486	8.18446	15.617	1.88494	0.91452	0.0160029	up	no
ENSMUSG00000029838	Ptn	pleiotrophin [Source:MGI Symbol;Acc:MGI:97804]	protein_coding	1.80138	1.42676	1.91894	0.405231	1.33203	0.78246	2.04272	1.03049	0.0160361	up	yes
ENSMUSG00000096718	Zfp781	zinc finger protein 781 [Source:MGI Symbol;Acc:MGI:3696710]	protein_coding	1.22566	1.10298	1.34621	0.294867	0.791728	0.768488	1.98096	0.986203	0.0171785	up	no
ENSMUSG00000029209	Gnpda2	glucosamine-6-phosphate deaminase 2 [Source:MGI Symbol;Acc:MGI:1915230]	protein_coding;retained_intron;nonsense_mediated_decay	2.53302	2.2245	2.39396	0.961861	1.69052	1.65639	1.65975	0.730964	0.0172582	up	no
ENSMUSG00000024750	Zfand5	zinc finger, AN1-type domain 5 [Source:MGI Symbol;Acc:MGI:1278334]	protein_coding;retained_intron;nonsense_mediated_decay	6.99522	7.04175	7.0052	3.05929	3.844	6.41599	1.57983	0.659768	0.0172785	up	no
ENSMUSG00000068205	Macrod2	MACRO domain containing 2 [Source:MGI Symbol;Acc:MGI:1920149]	retained_intron;processed_transcript;protein_coding	0.0886557	0.0597381	0.105582	0.0276963	0.0451621	0.0377868	2.29541	1.19875	0.0172811	up	yes
ENSMUSG00000040918	Slc19a2	solute carrier family 19 (thiamine transporter), member 2 [Source:MGI Symbol;Acc:MGI:1928761]	protein_coding;retained_intron	2.86094	2.71835	3.05392	1.203	2.42299	0.948974	1.88706	0.916138	0.0173274	up	no
ENSMUSG00000024070	Prkd3	protein kinase D3 [Source:MGI Symbol;Acc:MGI:1922542]	protein_coding;retained_intron;processed_transcript	8.30555	8.4931	9.09452	3.79868	7.20701	5.94819	1.52727	0.610956	0.0173425	up	no
ENSMUSG00000020661	Dnmt3a	DNA methyltransferase 3A [Source:MGI Symbol;Acc:MGI:1261827]	protein_coding;retained_intron;nonsense_mediated_decay	1.17963	1.26259	1.15302	0.991842	0.297396	0.294402	2.27024	1.18284	0.0174055	up	yes
ENSMUSG00000032624	Eml4	echinoderm microtubule associated protein like 4 [Source:MGI Symbol;Acc:MGI:1926048]	protein_coding;retained_intron	5.4598	5.41664	5.58104	2.0284	4.38505	3.83479	1.60588	0.683367	0.0179665	up	no
ENSMUSG00000002266	Zim1	zinc finger, imprinted 1 [Source:MGI Symbol;Acc:MGI:1341879]	protein_coding;processed_transcript	2.3838	2.87024	2.15796	1.19703	1.22635	2.0168	1.6693	0.739247	0.0180816	up	no
ENSMUSG00000050538	B230217C12Rik	RIKEN cDNA B230217C12 gene [Source:MGI Symbol;Acc:MGI:1915377]	protein_coding	0.698067	0.312542	0.490451	0.0877986	0.321726	0.202863	2.45116	1.29346	0.0186733	up	yes
ENSMUSG00000020300	Cpeb4	cytoplasmic polyadenylation element binding protein 4 [Source:MGI Symbol;Acc:MGI:1914829]	protein_coding	4.81148	4.19007	4.34235	0.719035	1.21722	4.26103	2.15318	1.10647	0.0187006	up	yes
ENSMUSG00000020364	Zfp354a	zinc finger protein 354A [Source:MGI Symbol;Acc:MGI:103172]	protein_coding;processed_transcript	0.911744	1.81638	1.1808	0.481093	0.561184	0.937357	1.97457	0.981536	0.0188889	up	no
ENSMUSG00000025979	Mob4	MOB family member 4, phocein [Source:MGI Symbol;Acc:MGI:104899]	protein_coding;retained_intron;nonsense_mediated_decay	13.1596	13.3866	13.5689	7.44427	8.67713	11.006	1.47877	0.564394	0.0195554	up	no
ENSMUSG00000039285	Azi2	5-azacytidine induced gene 2 [Source:MGI Symbol;Acc:MGI:1351332]	protein_coding;retained_intron;nonsense_mediated_decay	4.06619	6.47587	5.64896	2.74509	3.60857	3.94848	1.57162	0.65225	0.0199552	up	no
ENSMUSG00000033538	Casp4	caspase 4, apoptosis-related cysteine peptidase [Source:MGI Symbol;Acc:MGI:107700]	nonsense_mediated_decay;protein_coding;retained_intron	7.06224	7.78325	8.66124	2.93344	5.87273	5.84862	1.60403	0.681701	0.0201523	up	no
ENSMUSG00000031166	Wdr13	WD repeat domain 13 [Source:MGI Symbol;Acc:MGI:1914661]	nonsense_mediated_decay;protein_coding;retained_intron;processed_transcript	12.2873	12.5997	10.5115	5.57971	9.17021	8.86298	1.49912	0.584114	0.0214282	up	no
ENSMUSG00000031596	Slc7a2	solute carrier family 7 (cationic amino acid transporter, y+ system), member 2 [Source:MGI Symbol;Acc:MGI:99828]	protein_coding	8.23633	8.35769	9.3752	1.43145	5.71481	6.76987	1.86612	0.900044	0.0214435	up	no
ENSMUSG00000057363	Uxs1	UDP-glucuronate decarboxylase 1 [Source:MGI Symbol;Acc:MGI:1915133]	protein_coding;nonsense_mediated_decay;processed_transcript	17.0834	8.80784	15.5687	7.22632	9.62568	9.4127	1.57854	0.658593	0.0217954	up	no
ENSMUSG00000052446	Zfp961	zinc finger protein 961 [Source:MGI Symbol;Acc:MGI:3583954]	protein_coding;nonsense_mediated_decay;processed_transcript	1.0545	1.74274	0.543709	0.637017	0.526559	0.36315	2.18831	1.12982	0.0221403	up	yes
ENSMUSG00000022361	Zhx1	zinc fingers and homeoboxes 1 [Source:MGI Symbol;Acc:MGI:109271]	protein_coding;retained_intron	7.63933	5.11859	4.99339	2.91922	4.09664	4.33681	1.56363	0.644895	0.0222968	up	no
ENSMUSG00000020140	Lgr5	leucine rich repeat containing G protein coupled receptor 5 [Source:MGI Symbol;Acc:MGI:1341817]	protein_coding;retained_intron;processed_transcript	1.32065	1.3882	1.28312	0.371644	0.935847	0.976493	1.7478	0.805544	0.0223005	up	no
ENSMUSG00000112964	E430024I08Rik	RIKEN cDNA E430024I08 gene [Source:MGI Symbol;Acc:MGI:3649010]	lincRNA	1.11701	1.38497	1.1132	0.297133	0.680187	0.893354	1.93255	0.950508	0.0225986	up	no
ENSMUSG00000047735	Samd9l	sterile alpha motif domain containing 9-like [Source:MGI Symbol;Acc:MGI:1343184]	protein_coding	4.02679	3.42971	4.28616	0.824148	2.56036	3.02559	1.8319	0.873341	0.0228861	up	no
ENSMUSG00000025089	Gfra1	glial cell line derived neurotrophic factor family receptor alpha 1 [Source:MGI Symbol;Acc:MGI:1100842]	protein_coding;nonsense_mediated_decay	7.53435	7.90778	7.37917	5.40411	5.47897	2.69238	1.68107	0.749379	0.0228951	up	no
ENSMUSG00000028643	Svbp	small vasohibin binding protein [Source:MGI Symbol;Acc:MGI:1916466]	protein_coding	34.7508	35.9328	34.8444	9.30278	7.98977	35.237	2.00892	1.00642	0.023434	up	yes
ENSMUSG00000027861	Casq2	calsequestrin 2 [Source:MGI Symbol;Acc:MGI:1309469]	protein_coding;processed_transcript;retained_intron	264.365	279.362	261.436	165.306	181.794	214.106	1.4347	0.520749	0.0235219	up	no
ENSMUSG00000036446	Lum	lumican [Source:MGI Symbol;Acc:MGI:109347]	protein_coding	1.40421	1.60281	1.25474	0.267487	0.852104	0.93156	2.07774	1.05501	0.0236037	up	yes
ENSMUSG00000041481	Serpina3g	serine (or cysteine) peptidase inhibitor, clade A, member 3G [Source:MGI Symbol;Acc:MGI:105046]	protein_coding;processed_transcript	0.751871	0.416912	0.70822	0.350902	0.221441	0.282366	2.19607	1.13493	0.0236614	up	yes
ENSMUSG00000027316	Gfra4	glial cell line derived neurotrophic factor family receptor alpha 4 [Source:MGI Symbol;Acc:MGI:1341873]	retained_intron;protein_coding	2.09629	4.06013	3.98715	1.85625	2.22107	1.16236	1.93592	0.953016	0.023759	up	no
ENSMUSG00000051855	Mest	mesoderm specific transcript [Source:MGI Symbol;Acc:MGI:96968]	protein_coding;retained_intron;processed_transcript	2.43307	2.7907	3.35046	0.766689	1.54606	2.38238	1.8262	0.868844	0.0240087	up	no
ENSMUSG00000078994	Zfp429	zinc finger protein 429 [Source:MGI Symbol;Acc:MGI:1920057]	protein_coding	1.11425	1.03631	1.22392	0.357212	0.760433	0.633901	1.92658	0.94604	0.0241147	up	no
ENSMUSG00000074863	Platr25	pluripotency associated transcript 25 [Source:MGI Symbol;Acc:MGI:3645613]	protein_coding;processed_transcript;nonsense_mediated_decay	0.826194	0.677484	0.978808	0.167386	0.503522	0.574368	1.99352	0.99532	0.024346	up	no
ENSMUSG00000044338	Aplnr	apelin receptor [Source:MGI Symbol;Acc:MGI:1346086]	protein_coding	0.286237	0.466098	0.323332	0.17873	0.211577	0.10901	2.15428	1.1072	0.024398	up	yes
ENSMUSG00000039967	Zfp292	zinc finger protein 292 [Source:MGI Symbol;Acc:MGI:1353423]	protein_coding	3.32845	2.95612	3.34051	1.14555	2.72811	0.308562	2.30143	1.20253	0.0247372	up	yes
ENSMUSG00000021139	Gm20498	predicted gene 20498 [Source:MGI Symbol;Acc:MGI:5141963]	protein_coding;processed_transcript;nonsense_mediated_decay	3.11531	0.677855	2.88154	0.8947	1.17483	0.987562	2.18335	1.12655	0.0248515	up	yes
ENSMUSG00000113450	Gm49359	predicted gene, 49359 [Source:MGI Symbol;Acc:MGI:6121568]	protein_coding;processed_transcript	3.61122	3.35573	3.46717	0.69907	2.32492	2.47998	1.89574	0.922765	0.0251443	up	no
ENSMUSG00000031691	Tnpo2	transportin 2 (importin 3, karyopherin beta 2b) [Source:MGI Symbol;Acc:MGI:2384849]	protein_coding;retained_intron;processed_transcript	29.3613	19.2152	29.096	15.9554	13.1611	20.9651	1.55092	0.633122	0.0252619	up	no
ENSMUSG00000042284	Itga1	integrin alpha 1 [Source:MGI Symbol;Acc:MGI:96599]	protein_coding;retained_intron;processed_transcript	0.3031	0.287236	0.259576	0.0875072	0.178672	0.197901	1.83139	0.872939	0.0255368	up	no
ENSMUSG00000038451	Spsb2	splA/ryanodine receptor domain and SOCS box containing 2 [Source:MGI Symbol;Acc:MGI:1315199]	protein_coding	4.90738	11.7324	10.8036	6.92628	3.25038	3.38318	2.02387	1.01712	0.0263141	up	yes
ENSMUSG00000036291	Ap5m1	adaptor-related protein complex 5, mu 1 subunit [Source:MGI Symbol;Acc:MGI:1921635]	protein_coding;nonsense_mediated_decay	2.31435	2.34154	1.36921	0.664264	1.36116	1.53317	1.69311	0.75968	0.0263794	up	no
ENSMUSG00000028036	Ptgfr	prostaglandin F receptor [Source:MGI Symbol;Acc:MGI:97796]	protein_coding;processed_transcript	1.03448	0.910304	0.939039	0.331906	0.66629	0.638261	1.76224	0.817409	0.0265259	up	no
ENSMUSG00000027367	Stard7	START domain containing 7 [Source:MGI Symbol;Acc:MGI:2139090]	protein_coding;retained_intron;processed_transcript	12.1809	10.4509	6.46094	3.49088	7.67223	6.67214	1.63119	0.705926	0.0267791	up	no
ENSMUSG00000025083	Afap1l2	actin filament associated protein 1-like 2 [Source:MGI Symbol;Acc:MGI:2147658]	protein_coding;retained_intron	7.29183	7.36851	7.63169	3.38736	4.5735	6.6287	1.52794	0.611591	0.0267908	up	no
ENSMUSG00000033618	Map3k13	mitogen-activated protein kinase kinase kinase 13 [Source:MGI Symbol;Acc:MGI:2444243]	protein_coding	0.141936	0.0899245	0.118019	0.0326615	0.0797321	0.047109	2.19356	1.13328	0.0272762	up	yes
ENSMUSG00000031392	Irak1	interleukin-1 receptor-associated kinase 1 [Source:MGI Symbol;Acc:MGI:107420]	protein_coding;retained_intron;processed_transcript	13.9684	14.8312	10.8029	8.20919	8.62983	10.0602	1.47225	0.558027	0.0273377	up	no
ENSMUSG00000073490	Ifi207	interferon activated gene 207 [Source:MGI Symbol;Acc:MGI:2138302]	protein_coding	0.237176	0.308433	0.347582	0.107053	0.141949	0.178848	2.08763	1.06186	0.0276318	up	yes
ENSMUSG00000008307	1700109H08Rik	RIKEN cDNA 1700109H08 gene [Source:MGI Symbol;Acc:MGI:1924286]	retained_intron;nonsense_mediated_decay;protein_coding	0.383959	0.480015	0.521622	0.126708	0.22227	0.318419	2.07612	1.05389	0.0283987	up	yes
ENSMUSG00000043015	Nemp2	nuclear envelope integral membrane protein 2 [Source:MGI Symbol;Acc:MGI:2444113]	retained_intron;protein_coding;nonsense_mediated_decay;processed_transcript	0.296483	0.399499	0.567166	0.205762	0.141655	0.284053	2.00033	1.00024	0.0284036	up	yes
ENSMUSG00000029307	Dmp1	dentin matrix protein 1 [Source:MGI Symbol;Acc:MGI:94910]	protein_coding	0.741819	0.79659	1.0143	0.119912	0.47562	0.582726	2.16651	1.11537	0.0291048	up	yes
ENSMUSG00000061603	Akap6	A kinase (PRKA) anchor protein 6 [Source:MGI Symbol;Acc:MGI:3050566]	protein_coding	6.52217	6.66161	6.53991	3.80351	4.43142	5.47472	1.43867	0.524738	0.0291049	up	no
ENSMUSG00000020265	Sumo3	small ubiquitin-like modifier 3 [Source:MGI Symbol;Acc:MGI:1336201]	protein_coding;nonsense_mediated_decay;processed_transcript	22.5056	9.90655	17.9907	10.7056	9.8742	10.7261	1.61001	0.687072	0.029777	up	no
ENSMUSG00000092595	Gm20427	predicted gene 20427 [Source:MGI Symbol;Acc:MGI:5141892]	retained_intron	8.00966	8.27581	9.4208	2.45598	7.76405	5.19248	1.66788	0.738018	0.0298877	up	no
ENSMUSG00000021614	Vcan	versican [Source:MGI Symbol;Acc:MGI:102889]	protein_coding;retained_intron	35.1308	30.2212	37.7455	12.2766	25.1383	29.709	1.53593	0.619112	0.0299473	up	no
ENSMUSG00000073647	Gm10557	predicted gene 10557 [Source:MGI Symbol;Acc:MGI:3708638]	processed_pseudogene	17.3703	15.6218	17.5172	3.75743	10.2788	13.5995	1.82768	0.870014	0.0300997	up	no
ENSMUSG00000054619	Mettl7a1	methyltransferase like 7A1 [Source:MGI Symbol;Acc:MGI:1916523]	protein_coding;nonsense_mediated_decay	5.6494	6.85273	6.38753	1.60977	1.95578	6.22679	1.92902	0.94787	0.0301353	up	no
ENSMUSG00000020738	Sumo2	small ubiquitin-like modifier 2 [Source:MGI Symbol;Acc:MGI:2158813]	protein_coding;retained_intron;nonsense_mediated_decay	5.11434	36.7287	4.41362	7.28483	5.30514	4.6989	2.67551	1.41982	0.0301458	up	yes
ENSMUSG00000069763	Tmem100	transmembrane protein 100 [Source:MGI Symbol;Acc:MGI:1915138]	protein_coding	0.710321	0.742556	0.81636	0.214168	0.570471	0.322116	2.05035	1.03587	0.0302283	up	yes
ENSMUSG00000032035	Ets1	E26 avian leukemia oncogene 1, 5' domain [Source:MGI Symbol;Acc:MGI:95455]	protein_coding;retained_intron	4.85804	4.61778	5.04726	2.82036	4.19623	1.41849	1.72175	0.783873	0.0302479	up	no
ENSMUSG00000096916	Zfp850	zinc finger protein 850 [Source:MGI Symbol;Acc:MGI:3036281]	protein_coding	0.197618	0.191594	0.054027	0.0917145	0.042702	0.0222705	2.82882	1.5002	0.0310037	up	yes
ENSMUSG00000044501	Zfp758	zinc finger protein 758 [Source:MGI Symbol;Acc:MGI:2385044]	protein_coding	2.90352	2.85328	3.56287	0.597724	1.76128	2.53814	1.90308	0.928339	0.0313161	up	no
ENSMUSG00000026767	Mindy3	MINDY lysine 48 deubiquitinase 3 [Source:MGI Symbol;Acc:MGI:1914210]	retained_intron;nonsense_mediated_decay;protein_coding;processed_transcript	3.25023	3.20792	4.68241	1.93425	2.4683	2.80997	1.54461	0.627247	0.0314352	up	no
ENSMUSG00000074867	Zfp808	zinc finger protein 808 [Source:MGI Symbol;Acc:MGI:3704127]	protein_coding;processed_transcript	0.372263	0.189966	0.213034	0.0338149	0.117211	0.183156	2.31988	1.21405	0.031483	up	yes
ENSMUSG00000099342	Gm18180	predicted gene, 18180 [Source:MGI Symbol;Acc:MGI:5010365]	processed_pseudogene	0.713335	0.847194	0.996204	0.331466	0.400944	0.552824	1.98931	0.99227	0.0320416	up	no
ENSMUSG00000092178	Gm45351	predicted gene 45351 [Source:MGI Symbol;Acc:MGI:5791187]	unprocessed_pseudogene	1.06219	1.52217	1.56865	0.579278	0.898584	0.791082	1.83037	0.872137	0.0322964	up	no
ENSMUSG00000071180	Smim15	small integral membrane protein 15 [Source:MGI Symbol;Acc:MGI:1922866]	protein_coding	20.1426	13.6659	22.634	8.364	12.6742	0.83137	2.58087	1.36785	0.0323841	up	yes
ENSMUSG00000094622	Gm3055	predicted gene 3055 [Source:MGI Symbol;Acc:MGI:3809197]	protein_coding	0.827836	0.803134	0.908498	0.229128	0.575029	0.539059	1.89059	0.918835	0.0324771	up	no
ENSMUSG00000040329	Il7	interleukin 7 [Source:MGI Symbol;Acc:MGI:96561]	protein_coding;processed_transcript	0.240992	0.250214	0.282175	0.0815516	0.1775	0.136692	1.95425	0.966614	0.0327759	up	no
ENSMUSG00000095865	Gm13237	predicted gene 13237 [Source:MGI Symbol;Acc:MGI:3649924]	processed_pseudogene	12.0945	10.0912	6.65146	4.68432	3.29785	7.38507	1.87653	0.908071	0.03279	up	no
ENSMUSG00000087088	Gm16638	predicted gene, 16638 [Source:MGI Symbol;Acc:MGI:4439562]	antisense	0.342762	0.323558	0.260762	0.168572	0.181918	0.160737	1.81345	0.858733	0.03295	up	no
ENSMUSG00000007589	Tinf2	Terf1 (TRF1)-interacting nuclear factor 2 [Source:MGI Symbol;Acc:MGI:107246]	retained_intron;protein_coding	3.31596	3.47404	3.30159	1.92314	2.05952	2.53105	1.54928	0.631602	0.0331436	up	no
ENSMUSG00000054737	Zfp182	zinc finger protein 182 [Source:MGI Symbol;Acc:MGI:2442220]	protein_coding;processed_transcript	1.20725	1.23824	1.27257	0.290539	0.834362	0.907568	1.82933	0.871318	0.0332173	up	no
ENSMUSG00000085711	Gm15163	predicted gene 15163 [Source:MGI Symbol;Acc:MGI:3642430]	processed_pseudogene	4.35665	5.27802	4.00147	2.8368	2.75193	2.27124	1.73489	0.79484	0.0337564	up	no
ENSMUSG00000051586	Mical3	microtubule associated monooxygenase, calponin and LIM domain containing 3 [Source:MGI Symbol;Acc:MGI:2442733]	protein_coding;processed_transcript;retained_intron;nonsense_mediated_decay	1.49224	1.50028	0.943109	0.852445	0.884706	0.821852	1.53795	0.621011	0.0344038	up	no
ENSMUSG00000051022	Hs3st1	heparan sulfate (glucosamine) 3-O-sulfotransferase 1 [Source:MGI Symbol;Acc:MGI:1201606]	protein_coding	2.3423	1.9009	2.33992	1.08552	1.4062	1.36357	1.70756	0.771934	0.0344235	up	no
ENSMUSG00000033964	Zbtb41	zinc finger and BTB domain containing 41 [Source:MGI Symbol;Acc:MGI:2444487]	protein_coding;nonsense_mediated_decay	3.48869	3.94718	3.27249	1.62261	3.41828	1.66245	1.59747	0.675786	0.0344428	up	no
ENSMUSG00000027938	Creb3l4	cAMP responsive element binding protein 3-like 4 [Source:MGI Symbol;Acc:MGI:1916603]	protein_coding	0.624119	0.294911	0.59268	0.107956	0.277952	0.302337	2.19647	1.13519	0.0346393	up	yes
ENSMUSG00000060735	Rxfp3	relaxin family peptide receptor 3 [Source:MGI Symbol;Acc:MGI:2441827]	protein_coding	0.653881	0.541002	0.703062	0.264625	0.342784	0.438388	1.81483	0.859835	0.0346629	up	no
ENSMUSG00000044950	Pwwp2a	PWWP domain containing 2A [Source:MGI Symbol;Acc:MGI:1918052]	protein_coding;processed_transcript	1.88262	2.60502	1.57041	0.807688	1.3281	1.49476	1.66863	0.738667	0.0347428	up	no
ENSMUSG00000039462	Col10a1	collagen, type X, alpha 1 [Source:MGI Symbol;Acc:MGI:88445]	protein_coding	1.16708	1.21273	0.983159	0.359243	0.720222	0.753895	1.83432	0.875246	0.0350389	up	no
ENSMUSG00000085105	Gm12758	predicted gene 12758 [Source:MGI Symbol;Acc:MGI:3702543]	antisense	0.552561	0.214955	0.710418	0.110273	0.265933	0.31175	2.1483	1.10319	0.0351331	up	yes
ENSMUSG00000066878	Gm10184	predicted pseudogene 10184 [Source:MGI Symbol;Acc:MGI:3704480]	protein_coding	13.8722	5.96458	5.62485	2.88255	5.34393	5.92812	1.79882	0.847054	0.0352424	up	no
ENSMUSG00000026640	Plxna2	plexin A2 [Source:MGI Symbol;Acc:MGI:107684]	protein_coding;retained_intron;processed_transcript;nonsense_mediated_decay	4.88735	4.57473	4.52405	2.39303	3.55211	3.81833	1.4325	0.518531	0.0357823	up	no
ENSMUSG00000038305	Spats2l	spermatogenesis associated, serine-rich 2-like [Source:MGI Symbol;Acc:MGI:1914448]	protein_coding;retained_intron	0.905447	0.919588	0.85645	0.322311	0.629573	0.634691	1.69011	0.757116	0.0358346	up	no
ENSMUSG00000112922	Gm47572	predicted gene, 47572 [Source:MGI Symbol;Acc:MGI:6096602]	TEC	0.291858	0.33678	0.223098	0.08056	0.200769	0.133895	2.05127	1.03652	0.0360217	up	yes
ENSMUSG00000034574	Daam1	dishevelled associated activator of morphogenesis 1 [Source:MGI Symbol;Acc:MGI:1914596]	protein_coding;retained_intron	7.0418	4.58295	8.00806	2.5595	4.51535	5.47822	1.56398	0.645227	0.036455	up	no
ENSMUSG00000029490	Mfsd7a	major facilitator superfamily domain containing 7A [Source:MGI Symbol;Acc:MGI:2442629]	protein_coding	11.4937	13.2821	11.3014	5.38852	8.61543	10.0158	1.50198	0.586866	0.0365019	up	no
ENSMUSG00000034525	Ice1	interactor of little elongation complex ELL subunit 1 [Source:MGI Symbol;Acc:MGI:2385865]	protein_coding;nonsense_mediated_decay;processed_transcript	10.6194	8.62641	8.48837	4.55556	6.46469	8.02268	1.4564	0.542409	0.0365075	up	no
ENSMUSG00000027843	Ptpn22	protein tyrosine phosphatase, non-receptor type 22 (lymphoid) [Source:MGI Symbol;Acc:MGI:107170]	protein_coding;retained_intron;processed_transcript;nonsense_mediated_decay	0.245468	0.413586	0.394681	0.141399	0.18065	0.239581	1.87621	0.907822	0.0369106	up	no
ENSMUSG00000091625	Lsm5	LSM5 homolog, U6 small nuclear RNA and mRNA degradation associated [Source:MGI Symbol;Acc:MGI:1913623]	protein_coding;retained_intron;nonsense_mediated_decay	4.38398	3.03633	5.94631	2.27756	2.97724	1.77206	1.90222	0.92768	0.0369473	up	no
ENSMUSG00000081603	Gm14681	predicted gene 14681 [Source:MGI Symbol;Acc:MGI:3705734]	processed_pseudogene	80.1956	72.2586	77.5729	32.8197	68.5866	50.0145	1.51913	0.603241	0.0370385	up	no
ENSMUSG00000033952	Aspm	abnormal spindle microtubule assembly [Source:MGI Symbol;Acc:MGI:1334448]	protein_coding;retained_intron;processed_transcript	1.12472	1.27528	1.04142	0.414021	0.845696	0.867284	1.61797	0.694185	0.0373697	up	no
ENSMUSG00000116617	Gm49767	predicted gene, 49767 [Source:MGI Symbol;Acc:MGI:6215277]	lincRNA	0.289245	0.23876	0.26935	0.070066	0.126812	0.191292	2.05414	1.03853	0.0374006	up	yes
ENSMUSG00000110388	Gm30329	predicted gene, 30329 [Source:MGI Symbol;Acc:MGI:5589488]	antisense	0.747804	0.411159	0.626965	0.166872	0.379037	0.36935	1.95128	0.964422	0.0376865	up	no
ENSMUSG00000101800	Rnf170-ps	ring finger protein 170, pseudogene [Source:MGI Symbol;Acc:MGI:3645710]	processed_pseudogene	3.73101	4.26387	2.53685	1.75047	1.19009	2.54826	1.91876	0.940174	0.0378191	up	no
ENSMUSG00000104245	Gm38155	predicted gene, 38155 [Source:MGI Symbol;Acc:MGI:5611383]	antisense	0.651989	0.517389	0.706713	0.102844	0.343618	0.459315	2.07125	1.0505	0.0382861	up	yes
ENSMUSG00000037824	Tspan14	tetraspanin 14 [Source:MGI Symbol;Acc:MGI:1196325]	protein_coding;retained_intron	9.03082	8.74986	25.8615	7.35742	8.86375	8.45457	1.76863	0.822629	0.0383752	up	no
ENSMUSG00000029629	Phf14	PHD finger protein 14 [Source:MGI Symbol;Acc:MGI:1923539]	protein_coding;retained_intron;processed_transcript;nonsense_mediated_decay	2.70422	2.90253	2.63566	1.27958	2.12282	2.2183	1.46644	0.552316	0.0389629	up	no
ENSMUSG00000038486	Sv2a	synaptic vesicle glycoprotein 2 a [Source:MGI Symbol;Acc:MGI:1927139]	protein_coding;retained_intron;processed_transcript	0.169761	0.283752	0.212646	0.0857508	0.108913	0.140582	1.98707	0.990646	0.0392394	up	no
ENSMUSG00000017679	Ttpal	tocopherol (alpha) transfer protein-like [Source:MGI Symbol;Acc:MGI:1923330]	protein_coding;retained_intron;nonsense_mediated_decay	2.2709	0.928661	0.763892	0.755232	0.675225	0.634251	1.91962	0.940819	0.0395149	up	no
ENSMUSG00000054519	Zfp867	zinc finger protein 867 [Source:MGI Symbol;Acc:MGI:2681848]	protein_coding	4.95275	4.65116	5.13911	1.71147	3.63599	3.86318	1.60065	0.678661	0.0395718	up	no
ENSMUSG00000102302	Gm38190	predicted gene, 38190 [Source:MGI Symbol;Acc:MGI:5611418]	sense_intronic	0.142283	0.243562	0.210348	0.04621	0.110891	0.130635	2.07201	1.05103	0.0397271	up	yes
ENSMUSG00000054263	Lifr	LIF receptor alpha [Source:MGI Symbol;Acc:MGI:96788]	protein_coding;nonsense_mediated_decay;processed_transcript	9.3471	9.75436	9.63448	4.72993	8.33586	6.96083	1.43489	0.520938	0.039907	up	no
ENSMUSG00000031431	Tsc22d3	TSC22 domain family, member 3 [Source:MGI Symbol;Acc:MGI:1196284]	processed_transcript;protein_coding;retained_intron	10.5137	11.3438	11.1245	6.75876	8.26642	8.18083	1.42127	0.507182	0.0399915	up	no
ENSMUSG00000043090	Zfp866	zinc finger protein 866 [Source:MGI Symbol;Acc:MGI:3584369]	protein_coding	4.28563	4.3957	4.67985	2.10411	2.47913	4.14904	1.53009	0.613617	0.0403117	up	no
ENSMUSG00000031196	F8	coagulation factor VIII [Source:MGI Symbol;Acc:MGI:88383]	protein_coding	0.210282	0.173137	0.197865	0.0299565	0.127453	0.1254	2.05539	1.03941	0.0403439	up	yes
ENSMUSG00000083708	Gm13123	predicted gene 13123 [Source:MGI Symbol;Acc:MGI:3651473]	processed_pseudogene	5.81121	3.12808	4.89066	2.37133	1.37024	3.20728	1.99025	0.992951	0.0412059	up	no
ENSMUSG00000085913	Gm15601	predicted gene 15601 [Source:MGI Symbol;Acc:MGI:3783048]	antisense	0.349072	0.293323	0.31834	0.114215	0.159574	0.234016	1.89194	0.919866	0.0412983	up	no
ENSMUSG00000078866	Zfp970	zinc finger protein 970 [Source:MGI Symbol;Acc:MGI:3652255]	protein_coding	1.83229	2.25085	2.11543	0.669077	1.30133	1.55026	1.76062	0.816087	0.0413825	up	no
ENSMUSG00000005360	Slc1a3	solute carrier family 1 (glial high affinity glutamate transporter), member 3 [Source:MGI Symbol;Acc:MGI:99917]	protein_coding;retained_intron;processed_transcript	5.97709	5.49751	6.2825	1.90608	5.98837	3.10597	1.61422	0.690837	0.0416488	up	no
ENSMUSG00000021904	Sema3g	sema domain, immunoglobulin domain (Ig), short basic domain, secreted, (semaphorin) 3G [Source:MGI Symbol;Acc:MGI:3041242]	protein_coding	0.69632	0.452298	0.545311	0.203638	0.322823	0.405299	1.81799	0.862343	0.0418537	up	no
ENSMUSG00000035572	Dcaf10	DDB1 and CUL4 associated factor 10 [Source:MGI Symbol;Acc:MGI:2140179]	processed_transcript;protein_coding	4.91638	4.9749	4.80322	3.78607	2.64812	3.31989	1.5065	0.591198	0.042234	up	no
ENSMUSG00000074165	Zfp788	zinc finger protein 788 [Source:MGI Symbol;Acc:MGI:1914857]	protein_coding	1.67808	0.884036	1.30426	0.487029	1.05097	0.589757	1.81712	0.861651	0.0424989	up	no
ENSMUSG00000023025	Larp4	La ribonucleoprotein domain family, member 4 [Source:MGI Symbol;Acc:MGI:2443114]	protein_coding;nonsense_mediated_decay;retained_intron;processed_transcript	2.23771	5.45097	2.33541	2.00398	1.86032	2.16076	1.66373	0.734423	0.0426499	up	no
ENSMUSG00000028864	Hgf	hepatocyte growth factor [Source:MGI Symbol;Acc:MGI:96079]	protein_coding;retained_intron	2.72755	2.66566	2.58816	0.859019	1.77395	2.32347	1.61031	0.687334	0.0426956	up	no
ENSMUSG00000024168	Tmem204	transmembrane protein 204 [Source:MGI Symbol;Acc:MGI:3039635]	protein_coding;processed_transcript	0.795551	0.649013	0.72221	0.34253	0.40486	0.445735	1.81605	0.860802	0.0427397	up	no
ENSMUSG00000037610	Kcnmb2	potassium large conductance calcium-activated channel, subfamily M, beta member 2 [Source:MGI Symbol;Acc:MGI:1919663]	protein_coding	1.80212	1.81848	1.72508	0.68329	1.24729	1.24871	1.68141	0.749669	0.0428533	up	no
ENSMUSG00000060227	Casc4	cancer susceptibility candidate 4 [Source:MGI Symbol;Acc:MGI:2443129]	protein_coding;retained_intron;processed_transcript	3.41486	4.22852	3.8845	1.30617	2.65512	3.32244	1.58269	0.662377	0.0430069	up	no
ENSMUSG00000015134	Aldh1a3	aldehyde dehydrogenase family 1, subfamily A3 [Source:MGI Symbol;Acc:MGI:1861722]	protein_coding;retained_intron	2.24968	2.72963	2.47462	1.0295	1.94788	1.73865	1.58055	0.660431	0.0430215	up	no
ENSMUSG00000025163	Cd7	CD7 antigen [Source:MGI Symbol;Acc:MGI:88344]	protein_coding;retained_intron	4.68263	4.03456	6.01992	2.62751	3.1382	2.97895	1.68527	0.752978	0.0431773	up	no
ENSMUSG00000022723	Crybg3	beta-gamma crystallin domain containing 3 [Source:MGI Symbol;Acc:MGI:2676311]	protein_coding;retained_intron;processed_transcript	0.785265	0.792358	0.9231	0.405425	0.236936	0.75298	1.79219	0.841728	0.0432568	up	no
ENSMUSG00000058897	Col25a1	collagen, type XXV, alpha 1 [Source:MGI Symbol;Acc:MGI:1924268]	protein_coding;nonsense_mediated_decay;retained_intron;processed_transcript	0.521215	0.229821	0.313971	0.0801848	0.254415	0.213428	1.94334	0.958541	0.0435249	up	no
ENSMUSG00000037808	Fam76b	family with sequence similarity 76, member B [Source:MGI Symbol;Acc:MGI:1920076]	protein_coding;retained_intron;nonsense_mediated_decay	4.06016	4.93905	5.59555	2.1112	3.16103	4.22301	1.53706	0.620174	0.0435967	up	no
ENSMUSG00000022358	Fbxo32	F-box protein 32 [Source:MGI Symbol;Acc:MGI:1914981]	protein_coding	12.0804	11.6832	12.7605	5.91809	9.66769	10.0495	1.42476	0.510719	0.0436913	up	no
ENSMUSG00000037379	Spon2	spondin 2, extracellular matrix protein [Source:MGI Symbol;Acc:MGI:1923724]	retained_intron;protein_coding	29.9585	26.1027	28.2235	18.8868	21.5133	19.7078	1.40222	0.487713	0.0438186	up	no
ENSMUSG00000032358	Fam83b	family with sequence similarity 83, member B [Source:MGI Symbol;Acc:MGI:2685362]	protein_coding	0.318283	0.382286	0.410373	0.101945	0.196907	0.274779	1.93668	0.953589	0.0439326	up	no
ENSMUSG00000022206	Npr3	natriuretic peptide receptor 3 [Source:MGI Symbol;Acc:MGI:97373]	protein_coding;processed_transcript	0.231838	0.131846	0.125982	0.0587784	0.091298	0.103082	1.93423	0.951756	0.044051	up	no
ENSMUSG00000046807	Lrrc75b	leucine rich repeat containing 75B [Source:MGI Symbol;Acc:MGI:2143657]	protein_coding	0.56688	0.387375	1.6304	0.394327	0.418143	0.414179	2.10709	1.07525	0.0443155	up	yes
ENSMUSG00000103436	Gm36995	predicted gene, 36995 [Source:MGI Symbol;Acc:MGI:5610223]	retained_intron	0.29599	0.20032	0.777343	0.120557	0.194125	0.279968	2.14185	1.09886	0.0448103	up	yes
ENSMUSG00000058093	Zfp729b	zinc finger protein 729b [Source:MGI Symbol;Acc:MGI:2145180]	protein_coding;processed_transcript	2.07747	1.90846	2.02769	0.584524	1.79231	1.13233	1.71369	0.777105	0.0449224	up	no
ENSMUSG00000097820	E530011L22Rik	RIKEN cDNA E530011L22 gene [Source:MGI Symbol;Acc:MGI:2443770]	antisense	0.396971	0.811684	0.764109	0.250472	0.369529	0.446033	1.85056	0.887964	0.0451047	up	no
ENSMUSG00000049538	Adamts16	a disintegrin-like and metallopeptidase (reprolysin type) with thrombospondin type 1 motif, 16 [Source:MGI Symbol;Acc:MGI:2429637]	protein_coding;nonsense_mediated_decay;retained_intron	34.2192	31.9065	35.961	21.06	26.4533	26.1398	1.38605	0.470975	0.0453012	up	no
ENSMUSG00000053080	2700081O15Rik	RIKEN cDNA 2700081O15 gene [Source:MGI Symbol;Acc:MGI:1919667]	retained_intron;protein_coding;nonsense_mediated_decay	1.91194	6.24647	2.25563	1.81967	2.0005	2.02837	1.78062	0.832382	0.0454074	up	no
ENSMUSG00000026574	Dpt	dermatopontin [Source:MGI Symbol;Acc:MGI:1928392]	protein_coding	6.01626	6.13355	6.50266	3.12242	4.50303	4.40691	1.55019	0.632448	0.0455266	up	no
ENSMUSG00000022996	Wnt10b	wingless-type MMTV integration site family, member 10B [Source:MGI Symbol;Acc:MGI:108061]	protein_coding	2.23569	1.62922	2.41234	0.752131	1.92633	0.823921	1.79228	0.841795	0.0458746	up	no
ENSMUSG00000031079	Zfp300	zinc finger protein 300 [Source:MGI Symbol;Acc:MGI:3045326]	protein_coding;retained_intron;processed_transcript	0.25978	0.312761	0.340415	0.0134037	0.210127	0.149872	2.44496	1.28981	0.0460337	up	yes
ENSMUSG00000027184	Caprin1	cell cycle associated protein 1 [Source:MGI Symbol;Acc:MGI:1858234]	protein_coding;retained_intron;processed_transcript	30.0798	28.1668	28.8763	18.2986	26.2546	15.6542	1.44705	0.533111	0.0460583	up	no
ENSMUSG00000022032	Scara5	scavenger receptor class A, member 5 [Source:MGI Symbol;Acc:MGI:1918395]	protein_coding;processed_transcript	3.87524	3.16767	3.4519	1.89777	2.98478	2.08981	1.5052	0.589956	0.0461105	up	no
ENSMUSG00000034485	Uaca	uveal autoantigen with coiled-coil domains and ankyrin repeats [Source:MGI Symbol;Acc:MGI:1919815]	retained_intron;protein_coding	5.9224	5.45137	6.66601	1.83111	4.65737	4.99089	1.5715	0.652138	0.046366	up	no
ENSMUSG00000033706	Smyd5	SET and MYND domain containing 5 [Source:MGI Symbol;Acc:MGI:108048]	protein_coding;retained_intron;processed_transcript	5.47922	6.21713	5.93768	3.52766	2.70593	5.34317	1.52323	0.607131	0.0468279	up	no
ENSMUSG00000021519	Mterf3	mitochondrial transcription termination factor 3 [Source:MGI Symbol;Acc:MGI:1913660]	nonsense_mediated_decay;retained_intron;protein_coding;processed_transcript	5.43573	4.91368	5.7607	2.94019	4.08189	4.06037	1.45366	0.539691	0.0468732	up	no
ENSMUSG00000049878	Rlf	rearranged L-myc fusion sequence [Source:MGI Symbol;Acc:MGI:1924705]	protein_coding;retained_intron	6.20168	6.49826	6.77423	2.83204	1.10692	6.4471	1.87503	0.906912	0.0473129	up	no
ENSMUSG00000020863	Luc7l3	LUC7-like 3 (S. cerevisiae) [Source:MGI Symbol;Acc:MGI:1914934]	protein_coding;processed_transcript;retained_intron;nonsense_mediated_decay	9.45624	10.4972	10.4069	3.50775	9.06293	7.54927	1.50897	0.59356	0.047317	up	no
ENSMUSG00000024180	Tmem8	transmembrane protein 8 [Source:MGI Symbol;Acc:MGI:1926283]	retained_intron;protein_coding	0.678324	0.718189	0.766108	0.449859	0.261174	0.475453	1.82271	0.866086	0.0478231	up	no
ENSMUSG00000066829	Zfp810	zinc finger protein 810 [Source:MGI Symbol;Acc:MGI:2384563]	protein_coding;processed_transcript;retained_intron	3.90948	3.82327	3.70902	1.26701	2.80806	3.27436	1.55682	0.638605	0.0482787	up	no
ENSMUSG00000107658	Gm44958	predicted gene 44958 [Source:MGI Symbol;Acc:MGI:5753534]	processed_pseudogene	1.55686	1.77441	1.70986	0.268954	0.983318	1.21446	2.04364	1.03114	0.0484988	up	yes
ENSMUSG00000037013	Ss18	SS18, nBAF chromatin remodeling complex subunit [Source:MGI Symbol;Acc:MGI:107708]	retained_intron;protein_coding;nonsense_mediated_decay	5.75024	5.41802	5.38655	2.67329	4.06392	4.79603	1.4354	0.521453	0.048509	up	no
ENSMUSG00000042208	0610010F05Rik	RIKEN cDNA 0610010F05 gene [Source:MGI Symbol;Acc:MGI:1918925]	protein_coding;nonsense_mediated_decay	6.19529	5.60986	6.07542	2.37431	4.57185	5.02722	1.49336	0.578562	0.0485348	up	no
ENSMUSG00000048938	Nr1h5	nuclear receptor subfamily 1, group H, member 5 [Source:MGI Symbol;Acc:MGI:3026618]	protein_coding;nonsense_mediated_decay	0.510017	0.565025	0.616776	0.133969	0.468415	0.273656	1.93121	0.949506	0.0492025	up	no
ENSMUSG00000061411	Nol4l	nucleolar protein 4-like [Source:MGI Symbol;Acc:MGI:1918765]	protein_coding;processed_transcript	0.264258	0.211516	0.316057	0.158586	0.155535	0.127137	1.79448	0.843567	0.0492322	up	no
ENSMUSG00000054640	Slc8a1	solute carrier family 8 (sodium/calcium exchanger), member 1 [Source:MGI Symbol;Acc:MGI:107956]	protein_coding	1.65976	1.49069	1.57971	0.957573	1.26768	1.06788	1.43637	0.522426	0.0495947	up	no
ENSMUSG00000020077	Srgn	serglycin [Source:MGI Symbol;Acc:MGI:97756]	protein_coding;processed_transcript	0.274647	0.485593	0.486866	0.126732	0.261098	0.233904	2.00585	1.00422	0.0496526	up	yes
ENSMUSG00000038390	Gpr162	G protein-coupled receptor 162 [Source:MGI Symbol;Acc:MGI:1315214]	protein_coding;retained_intron;processed_transcript	0.606995	1.3436	0.987168	0.236597	0.59393	0.707888	1.90961	0.933276	0.0497468	up	no
ENSMUSG00000117856	AL603804	ribosomal protein L15 (Rpl15) pseudogene	processed_pseudogene	0.0001	0.0001	0.0001	9.44816	6.6438	6.06436	1.35402e-05	-16.1724	4.85533e-37	down	yes
ENSMUSG00000034394	Lif	leukemia inhibitory factor [Source:MGI Symbol;Acc:MGI:96787]	protein_coding;processed_transcript	2.23172	1.78024	1.91668	4.7836	7.75237	7.2954	0.298953	-1.74201	1.21797e-11	down	yes
ENSMUSG00000017493	Igfbp4	insulin-like growth factor binding protein 4 [Source:MGI Symbol;Acc:MGI:96439]	protein_coding;processed_transcript	13.3398	14.373	13.1464	24.6273	43.8083	37.3497	0.386246	-1.37241	4.05466e-10	down	yes
ENSMUSG00000107705	Gm45062	predicted gene 45062 [Source:MGI Symbol;Acc:MGI:5753638]	nonsense_mediated_decay	0.0001	0.0001	0.0001	0.314993	0.0001	0.519193	0.000359589	-11.4414	9.34073e-07	down	yes
ENSMUSG00000040557	Mettl27	methyltransferase like 27 [Source:MGI Symbol;Acc:MGI:1933146]	protein_coding;processed_transcript	0.711288	1.76581	0.64245	3.69547	3.86591	3.6401	0.278494	-1.84428	1.10207e-06	down	yes
ENSMUSG00000102976	Zc3h11a	zinc finger CCCH type containing 11A [Source:MGI Symbol;Acc:MGI:1917829]	protein_coding;retained_intron;processed_transcript	1.96853	1.97535	1.30294	1.31541	23.2934	17.9359	0.123325	-3.01946	1.74667e-06	down	yes
ENSMUSG00000035585	Tsen34	tRNA splicing endonuclease subunit 34 [Source:MGI Symbol;Acc:MGI:1913328]	protein_coding;retained_intron;nonsense_mediated_decay	6.54123	6.91951	5.94675	13.0493	13.643	12.5252	0.494868	-1.01488	3.01499e-06	down	yes
ENSMUSG00000042705	Commd10	COMM domain containing 10 [Source:MGI Symbol;Acc:MGI:1916706]	protein_coding;retained_intron;nonsense_mediated_decay;processed_transcript	2.65105	2.57334	2.86558	5.46964	5.86098	4.59517	0.507979	-0.977159	9.00272e-06	down	no
ENSMUSG00000038807	Rap1gap2	RAP1 GTPase activating protein 2 [Source:MGI Symbol;Acc:MGI:3028623]	processed_transcript;nonsense_mediated_decay;protein_coding	3.75291	3.27259	3.84052	2.92666	16.381	18.6988	0.2859	-1.80642	3.12853e-05	down	yes
ENSMUSG00000048833	Slc39a9	solute carrier family 39 (zinc transporter), member 9 [Source:MGI Symbol;Acc:MGI:1914820]	protein_coding;processed_transcript;retained_intron	1.15173	1.2974	1.38706	5.40629	1.18678	6.04553	0.303529	-1.7201	4.6115e-05	down	yes
ENSMUSG00000032715	Trib3	tribbles pseudokinase 3 [Source:MGI Symbol;Acc:MGI:1345675]	protein_coding;processed_transcript;retained_intron	9.16274	9.15097	9.85245	24.6	15.9113	15.3424	0.504286	-0.987687	7.05231e-05	down	no
ENSMUSG00000040618	Pck2	phosphoenolpyruvate carboxykinase 2 (mitochondrial) [Source:MGI Symbol;Acc:MGI:1860456]	protein_coding;retained_intron;processed_transcript;nonsense_mediated_decay	8.76504	8.19809	7.34969	20.4729	12.1633	13.881	0.522664	-0.936045	7.22957e-05	down	no
ENSMUSG00000078901	Gm14440	predicted gene 14440 [Source:MGI Symbol;Acc:MGI:3702430]	protein_coding	0.106285	0.0001	0.0001	0.271386	0.454187	0.710322	0.0741593	-3.75323	0.000125848	down	yes
ENSMUSG00000037966	Ninj1	ninjurin 1 [Source:MGI Symbol;Acc:MGI:1196617]	nonsense_mediated_decay;protein_coding;processed_transcript	5.69529	7.46641	6.57183	21.1108	9.98228	12.438	0.45332	-1.1414	0.000199056	down	yes
ENSMUSG00000050299	Gm9843	predicted gene 9843 [Source:MGI Symbol;Acc:MGI:3708621]	processed_pseudogene	27.0902	16.9465	17.0111	71.1061	48.1427	27.1451	0.41701	-1.26185	0.000303786	down	yes
ENSMUSG00000040323	Gm15429	predicted pseudogene 15429 [Source:MGI Symbol;Acc:MGI:3642423]	processed_pseudogene	0.454981	0.140335	0.247931	0.451665	1.59173	1.64456	0.228649	-2.1288	0.000325667	down	yes
ENSMUSG00000034201	Gas2l1	growth arrest-specific 2 like 1 [Source:MGI Symbol;Acc:MGI:1926176]	processed_transcript;protein_coding	5.06579	5.40946	5.69093	14.361	8.05759	8.01919	0.531122	-0.912885	0.000341708	down	no
ENSMUSG00000038965	Ube2l3	ubiquitin-conjugating enzyme E2L 3 [Source:MGI Symbol;Acc:MGI:109240]	protein_coding;nonsense_mediated_decay;processed_transcript	5.98815	13.9085	5.78497	21.8606	21.0381	12.9898	0.459515	-1.12182	0.000393262	down	yes
ENSMUSG00000046079	Lrrc8d	leucine rich repeat containing 8D [Source:MGI Symbol;Acc:MGI:1922368]	protein_coding;processed_transcript;retained_intron	0.159318	0.171732	0.172831	0.478031	0.818814	0.186806	0.339622	-1.558	0.000546867	down	yes
ENSMUSG00000053398	Phgdh	3-phosphoglycerate dehydrogenase [Source:MGI Symbol;Acc:MGI:1355330]	protein_coding;retained_intron	51.3735	48.6788	50.4856	104.833	72.2133	71.1497	0.606528	-0.721353	0.000728659	down	no
ENSMUSG00000030680	Pagr1a	PAXIP1 associated glutamate rich protein 1A [Source:MGI Symbol;Acc:MGI:1914528]	protein_coding	0.190255	0.314527	0.439787	0.917074	13.1552	0.038673	0.0669389	-3.90101	0.000864745	down	yes
ENSMUSG00000028542	Slc6a9	solute carrier family 6 (neurotransmitter transporter, glycine), member 9 [Source:MGI Symbol;Acc:MGI:95760]	protein_coding;nonsense_mediated_decay;processed_transcript;retained_intron	5.04544	3.85559	4.80716	9.392	7.0301	6.79563	0.590419	-0.760189	0.000941494	down	no
ENSMUSG00000056234	Ncoa4	nuclear receptor coactivator 4 [Source:MGI Symbol;Acc:MGI:1350932]	protein_coding;retained_intron;nonsense_mediated_decay;processed_transcript	5.74366	2.57343	2.67553	4.96174	9.09497	7.72751	0.504614	-0.986749	0.00094362	down	no
ENSMUSG00000034902	Pip5k1c	phosphatidylinositol-4-phosphate 5-kinase, type 1 gamma [Source:MGI Symbol;Acc:MGI:1298224]	protein_coding;nonsense_mediated_decay;retained_intron	3.0345	6.86055	4.09762	13.4454	7.61409	7.12806	0.496413	-1.01039	0.00121514	down	yes
ENSMUSG00000022905	Kpna1	karyopherin (importin) alpha 1 [Source:MGI Symbol;Acc:MGI:103560]	protein_coding;nonsense_mediated_decay;retained_intron;processed_transcript	4.06939	3.53975	4.17945	8.61063	3.60475	11.5019	0.497046	-1.00855	0.00126197	down	yes
ENSMUSG00000072789	Gm10420	predicted gene 10420 [Source:MGI Symbol;Acc:MGI:3704275]	processed_pseudogene	18.5663	10.4722	18.9226	24.6144	22.351	46.9319	0.510782	-0.96922	0.00150325	down	no
ENSMUSG00000027313	Chac1	ChaC, cation transport regulator 1 [Source:MGI Symbol;Acc:MGI:1916315]	protein_coding	15.601	16.4618	15.6858	32.819	24.0736	21.486	0.609205	-0.715001	0.00158481	down	no
ENSMUSG00000012296	Tjap1	tight junction associated protein 1 [Source:MGI Symbol;Acc:MGI:1921344]	protein_coding;retained_intron;processed_transcript	6.70294	6.08785	7.09444	10.2159	11.0633	9.33473	0.649547	-0.622494	0.00159917	down	no
ENSMUSG00000044857	Lemd2	LEM domain containing 2 [Source:MGI Symbol;Acc:MGI:2385045]	protein_coding;retained_intron	7.21148	7.36567	7.2997	9.35946	12.1299	11.7805	0.657557	-0.604811	0.00165577	down	no
ENSMUSG00000043372	Hexim2	hexamethylene bis-acetamide inducible 2 [Source:MGI Symbol;Acc:MGI:1918309]	protein_coding	0.264646	0.279385	0.435411	1.17254	0.99617	0.442248	0.375127	-1.41455	0.00181387	down	yes
ENSMUSG00000079018	Ly6c1	lymphocyte antigen 6 complex, locus C1 [Source:MGI Symbol;Acc:MGI:96882]	protein_coding	34.5432	12.0248	9.67201	37.6095	39.0135	45.3308	0.461158	-1.11667	0.00183125	down	yes
ENSMUSG00000040010	Slc7a5	solute carrier family 7 (cationic amino acid transporter, y+ system), member 5 [Source:MGI Symbol;Acc:MGI:1298205]	protein_coding;retained_intron;processed_transcript	45.1758	46.2248	44.4336	112.188	63.6325	56.6034	0.584424	-0.774913	0.00194703	down	no
ENSMUSG00000112908	Gm7392	predicted gene 7392 [Source:MGI Symbol;Acc:MGI:3648358]	processed_pseudogene	124.698	50.4273	105.272	197.313	202.933	126.156	0.532666	-0.908696	0.00217092	down	no
ENSMUSG00000068240	Gm11808	predicted gene 11808 [Source:MGI Symbol;Acc:MGI:3649356]	protein_coding	112.422	106.752	99.0531	321.77	136.172	138.661	0.533399	-0.906713	0.00223488	down	no
ENSMUSG00000062328	Rpl17	ribosomal protein L17 [Source:MGI Symbol;Acc:MGI:2448270]	protein_coding	105.111	166.914	98.5631	145.074	215.385	249.712	0.607352	-0.719396	0.00224905	down	no
ENSMUSG00000050900	Gm7327	predicted gene 7327 [Source:MGI Symbol;Acc:MGI:3646274]	processed_pseudogene	3.00252	2.71336	4.6689	6.71277	7.21456	7.34453	0.488194	-1.03447	0.00242378	down	yes
ENSMUSG00000069939	Gm12070	predicted gene 12070 [Source:MGI Symbol;Acc:MGI:3650751]	processed_pseudogene	175.707	180.812	141.173	368.135	186.188	271.503	0.60266	-0.730584	0.00258435	down	no
ENSMUSG00000074547	Rps8-ps4	ribosomal protein S8, pseudogene 4 [Source:MGI Symbol;Acc:MGI:3809043]	processed_pseudogene	2.46579	0.636126	1.11727	5.5494	2.63325	3.78648	0.352506	-1.50428	0.00263557	down	yes
ENSMUSG00000026279	Thap4	THAP domain containing 4 [Source:MGI Symbol;Acc:MGI:1914276]	protein_coding;retained_intron;nonsense_mediated_decay	2.82807	1.64644	2.05553	6.70659	2.18609	4.4615	0.488989	-1.03213	0.00272295	down	yes
ENSMUSG00000042870	Tom1	target of myb1 trafficking protein [Source:MGI Symbol;Acc:MGI:1338026]	protein_coding;nonsense_mediated_decay;processed_transcript	16.4441	15.7925	16.2836	28.9896	20.6291	24.3522	0.655938	-0.60837	0.00280802	down	no
ENSMUSG00000090083	Rnf8	ring finger protein 8 [Source:MGI Symbol;Acc:MGI:1929069]	retained_intron;protein_coding;nonsense_mediated_decay;processed_transcript	0.97772	1.17852	1.08001	1.54582	1.92694	1.74309	0.620464	-0.688581	0.0029664	down	no
ENSMUSG00000018858	Mrpl58	mitochondrial ribosomal protein L58 [Source:MGI Symbol;Acc:MGI:1915822]	retained_intron;protein_coding;nonsense_mediated_decay;processed_transcript	3.61359	6.06559	3.52721	10.0163	7.00065	6.11046	0.571028	-0.808367	0.00354045	down	no
ENSMUSG00000024640	Psat1	phosphoserine aminotransferase 1 [Source:MGI Symbol;Acc:MGI:2183441]	protein_coding;retained_intron;processed_transcript	36.1988	35.4211	37.0248	49.0632	59.949	47.5618	0.693887	-0.527227	0.00359185	down	no
ENSMUSG00000037098	Rab11fip3	RAB11 family interacting protein 3 (class II) [Source:MGI Symbol;Acc:MGI:2444431]	protein_coding;processed_transcript;retained_intron	4.19354	4.77391	7.86735	10.4378	8.56382	8.33918	0.615739	-0.699609	0.00365288	down	no
ENSMUSG00000044217	Aqp5	aquaporin 5 [Source:MGI Symbol;Acc:MGI:106215]	protein_coding;retained_intron	10.5385	9.08757	9.3356	14.0923	9.01569	38.1195	0.473017	-1.08003	0.00367476	down	yes
ENSMUSG00000029446	Psph	phosphoserine phosphatase [Source:MGI Symbol;Acc:MGI:97788]	protein_coding;processed_transcript;retained_intron	5.38609	4.88128	5.99266	8.63525	8.50898	7.51022	0.659517	-0.600519	0.004064	down	no
ENSMUSG00000052146	Rps10	ribosomal protein S10 [Source:MGI Symbol;Acc:MGI:1914347]	protein_coding;retained_intron	48.0731	47.4869	48.4544	96.9236	48.61	85.918	0.622223	-0.684497	0.00412405	down	no
ENSMUSG00000102440	Pcdhga9	protocadherin gamma subfamily A, 9 [Source:MGI Symbol;Acc:MGI:1935226]	protein_coding;retained_intron	8.60956	0.56176	0.873619	113.886	1.41285	2.23004	0.0854679	-3.54847	0.0045398	down	yes
ENSMUSG00000026797	Stxbp1	syntaxin binding protein 1 [Source:MGI Symbol;Acc:MGI:107363]	processed_transcript;protein_coding;retained_intron	5.72026	10.3083	5.43386	14.254	10.808	10.374	0.605665	-0.723408	0.00455273	down	no
ENSMUSG00000029028	Lrrc47	leucine rich repeat containing 47 [Source:MGI Symbol;Acc:MGI:1920196]	protein_coding;retained_intron	4.35628	5.04722	14.792	17.4581	14.9231	15.8486	0.501672	-0.995182	0.00474739	down	no
ENSMUSG00000115188	Gm46522	predicted gene, 46522 [Source:MGI Symbol;Acc:MGI:5826159]	processed_pseudogene	5.38931	4.70434	2.27236	44.3284	2.60976	4.73892	0.239294	-2.06315	0.0049107	down	yes
ENSMUSG00000044533	Rps2	ribosomal protein S2 [Source:MGI Symbol;Acc:MGI:105110]	retained_intron;protein_coding	23.4191	16.564	21.9744	45.7383	26.2885	27.5527	0.622191	-0.68457	0.00569206	down	no
ENSMUSG00000042331	Specc1	sperm antigen with calponin homology and coiled-coil domains 1 [Source:MGI Symbol;Acc:MGI:2442356]	protein_coding;retained_intron;processed_transcript	3.87204	3.12055	4.58243	5.61788	5.3642	5.8599	0.687272	-0.541047	0.00576138	down	no
ENSMUSG00000039518	Cdsn	corneodesmosin [Source:MGI Symbol;Acc:MGI:3505689]	protein_coding	1.77272	1.69518	2.54021	3.67989	3.84263	2.94588	0.573928	-0.801057	0.00588	down	no
ENSMUSG00000082419	Gm11425	predicted gene 11425 [Source:MGI Symbol;Acc:MGI:3650957]	processed_pseudogene	2.41782	2.84394	1.72183	6.43892	2.86131	6.11386	0.453065	-1.14221	0.00594672	down	yes
ENSMUSG00000082604	Gm8482	predicted pseudogene 8482 [Source:MGI Symbol;Acc:MGI:3647858]	processed_pseudogene	4.68898	3.07122	4.33527	10.4341	8.03816	5.88682	0.496548	-1.01	0.00595064	down	yes
ENSMUSG00000113159	Gm48771	predicted gene, 48771 [Source:MGI Symbol;Acc:MGI:6098462]	TEC	1.15993	0.75974	1.07243	2.58114	1.98843	1.45625	0.496548	-1.01	0.005955	down	yes
ENSMUSG00000011096	Akt1s1	AKT1 substrate 1 (proline-rich) [Source:MGI Symbol;Acc:MGI:1914855]	protein_coding;retained_intron	12.9477	7.42229	14.5737	25.5029	16.2053	16.1684	0.603762	-0.727948	0.00651543	down	no
ENSMUSG00000025403	Shmt2	serine hydroxymethyltransferase 2 (mitochondrial) [Source:MGI Symbol;Acc:MGI:1277989]	protein_coding;retained_intron;processed_transcript	42.5236	42.9275	42.0047	82.1271	53.3298	54.2635	0.671809	-0.573878	0.0066744	down	no
ENSMUSG00000099902	Gm12115	predicted gene 12115 [Source:MGI Symbol;Acc:MGI:3652288]	processed_pseudogene	1.41318	1.84542	2.92661	2.71755	6.26906	4.89095	0.445698	-1.16586	0.00676706	down	yes
ENSMUSG00000035242	Oaz1	ornithine decarboxylase antizyme 1 [Source:MGI Symbol;Acc:MGI:109433]	protein_coding;retained_intron	31.7079	29.1682	30.3194	51.794	33.0914	49.9746	0.676224	-0.564427	0.00690341	down	no
ENSMUSG00000091639	Gm3756	predicted gene 3756 [Source:MGI Symbol;Acc:MGI:3781931]	processed_pseudogene	8.59466	8.52934	11.118	19.5504	13.5821	12.6384	0.61703	-0.696588	0.0071742	down	no
ENSMUSG00000038539	Atf5	activating transcription factor 5 [Source:MGI Symbol;Acc:MGI:2141857]	protein_coding	79.3911	78.5442	79.3647	171.634	102.164	93.1228	0.646735	-0.628754	0.00719439	down	no
ENSMUSG00000050860	Phospho1	phosphatase, orphan 1 [Source:MGI Symbol;Acc:MGI:2447348]	protein_coding	8.12523	8.90668	9.67592	28.8357	10.1605	10.9546	0.534683	-0.903244	0.007235	down	no
ENSMUSG00000020460	Rps27a	ribosomal protein S27A [Source:MGI Symbol;Acc:MGI:1925544]	protein_coding;processed_transcript	155.421	112.635	153.334	215.829	208.45	178.771	0.698765	-0.517121	0.00726339	down	no
ENSMUSG00000015093	Clic3	chloride intracellular channel 3 [Source:MGI Symbol;Acc:MGI:1916704]	processed_transcript;protein_coding	8.69547	10.602	8.14135	22.3692	11.7712	13.1466	0.580263	-0.785222	0.00769323	down	no
ENSMUSG00000029816	Gpnmb	glycoprotein (transmembrane) nmb [Source:MGI Symbol;Acc:MGI:1934765]	protein_coding;retained_intron;nonsense_mediated_decay	0.0595435	0.086481	0.046671	0.151404	0.168199	0.113779	0.444632	-1.16932	0.00770726	down	yes
ENSMUSG00000027488	Snta1	syntrophin, acidic 1 [Source:MGI Symbol;Acc:MGI:101772]	protein_coding;processed_transcript	12.4801	11.8393	12.2518	26.5694	14.527	15.7504	0.643329	-0.636372	0.00802246	down	no
ENSMUSG00000042138	Msantd2	Myb/SANT-like DNA-binding domain containing 2 [Source:MGI Symbol;Acc:MGI:2384579]	protein_coding;retained_intron;nonsense_mediated_decay;processed_transcript	0.741778	0.587312	1.02586	1.14884	1.85676	1.43832	0.529927	-0.916134	0.00821327	down	no
ENSMUSG00000089803	Gm10171	predicted gene 10171 [Source:MGI Symbol;Acc:MGI:3704203]	processed_pseudogene	42.4117	21.5919	19.4458	48.014	43.9186	45.768	0.606021	-0.722561	0.00861925	down	no
ENSMUSG00000026380	Tfcp2l1	transcription factor CP2-like 1 [Source:MGI Symbol;Acc:MGI:2444691]	protein_coding;processed_transcript	0.0570616	0.0783495	0.115464	0.182424	0.146514	0.19243	0.481186	-1.05533	0.00924221	down	yes
ENSMUSG00000054136	Adm2	adrenomedullin 2 [Source:MGI Symbol;Acc:MGI:2675256]	protein_coding	1.46108	1.23433	1.13477	6.09274	1.99009	1.26593	0.4097	-1.28736	0.00967953	down	yes
ENSMUSG00000104802	Gm5869	predicted gene 5869 [Source:MGI Symbol;Acc:MGI:3648808]	processed_pseudogene	6.15486	5.35682	5.22197	10.0205	6.49875	10.9226	0.609787	-0.713624	0.00979181	down	no
ENSMUSG00000093674	Rpl41	ribosomal protein L41 [Source:MGI Symbol;Acc:MGI:1915195]	retained_intron;protein_coding	317.184	329.819	371.405	772.792	422.114	386.453	0.644007	-0.634851	0.00996439	down	no
ENSMUSG00000048758	Rpl29	ribosomal protein L29 [Source:MGI Symbol;Acc:MGI:99687]	protein_coding	0.318882	0.897398	7.96269	14.7812	10.5149	9.04607	0.26728	-1.90358	0.0102398	down	yes
ENSMUSG00000032010	Usp2	ubiquitin specific peptidase 2 [Source:MGI Symbol;Acc:MGI:1858178]	protein_coding;nonsense_mediated_decay;processed_transcript	0.892068	2.6654	1.13956	3.67455	2.65457	2.58082	0.527168	-0.923666	0.0102406	down	no
ENSMUSG00000029344	Tpst2	protein-tyrosine sulfotransferase 2 [Source:MGI Symbol;Acc:MGI:1309516]	protein_coding;retained_intron;nonsense_mediated_decay	20.9573	16.2654	17.7482	41.6998	25.5703	19.3495	0.634624	-0.656025	0.0105509	down	no
ENSMUSG00000045752	Tssc4	tumor-suppressing subchromosomal transferable fragment 4 [Source:MGI Symbol;Acc:MGI:1861712]	protein_coding;retained_intron	5.98327	5.74131	4.89679	6.80591	6.19194	17.5928	0.543348	-0.880052	0.0105741	down	no
ENSMUSG00000081170	Gm12922	predicted gene 12922 [Source:MGI Symbol;Acc:MGI:3651537]	processed_pseudogene	17.4509	16.4768	22.1862	52.0167	23.6993	21.3426	0.578145	-0.790496	0.011217	down	no
ENSMUSG00000082193	Rpl5-ps1	ribosomal protein L5, pseudogene 1 [Source:MGI Symbol;Acc:MGI:3647110]	processed_pseudogene	4.09463	1.3672	3.67161	4.10918	4.03628	14.1397	0.409845	-1.28685	0.0112434	down	yes
ENSMUSG00000047379	B4gat1	beta-1,4-glucuronyltransferase 1 [Source:MGI Symbol;Acc:MGI:1919680]	protein_coding	0.7321	1.89814	8.03565	0.786489	22.9374	25.7198	0.215717	-2.21279	0.0112851	down	yes
ENSMUSG00000082901	Gm14323	predicted gene 14323 [Source:MGI Symbol;Acc:MGI:3650742]	processed_pseudogene	6.00046	7.99144	7.33678	15.2834	12.4922	8.84447	0.582431	-0.779841	0.0118179	down	no
ENSMUSG00000032966	Fkbp1a	FK506 binding protein 1a [Source:MGI Symbol;Acc:MGI:95541]	protein_coding;retained_intron;processed_transcript	26.192	30.1308	25.2508	88.5803	28.1445	30.4071	0.554425	-0.850935	0.0118398	down	no
ENSMUSG00000058603	Rpl28-ps1	ribosomal protein L28, pseudogene 1 [Source:MGI Symbol;Acc:MGI:3705349]	processed_pseudogene	46.5151	61.563	58.4107	134.302	75.3899	60.3674	0.616489	-0.697852	0.0119036	down	no
ENSMUSG00000108506	Gm44705	predicted gene 44705 [Source:MGI Symbol;Acc:MGI:5753281]	processed_pseudogene	4.93623	7.43086	4.91271	14.588	16.3422	5.22408	0.477945	-1.06508	0.0119698	down	yes
ENSMUSG00000084111	Gm15710	predicted gene 15710 [Source:MGI Symbol;Acc:MGI:3783151]	processed_pseudogene	93.5298	73.1527	91.6274	154.895	97.1773	122.998	0.688698	-0.538057	0.0122275	down	no
ENSMUSG00000082530	Gm12168	predicted gene 12168 [Source:MGI Symbol;Acc:MGI:3650839]	processed_pseudogene	2.31735	1.60919	2.30412	5.06029	3.31207	4.08455	0.500176	-0.999491	0.0124744	down	no
ENSMUSG00000036854	Hspb6	heat shock protein, alpha-crystallin-related, B6 [Source:MGI Symbol;Acc:MGI:2685325]	protein_coding;processed_transcript	5.12349	5.10069	5.07878	9.38429	6.73864	7.16494	0.657122	-0.605767	0.0127146	down	no
ENSMUSG00000059159	Gm8129	predicted pseudogene 8129 [Source:MGI Symbol;Acc:MGI:3646863]	processed_pseudogene	114.863	111.545	105.04	236.906	150.507	122.418	0.650115	-0.621233	0.0127635	down	no
ENSMUSG00000025538	Sumf2	sulfatase modifying factor 2 [Source:MGI Symbol;Acc:MGI:1915152]	processed_transcript;protein_coding;nonsense_mediated_decay	4.66313	4.93349	4.24166	6.98625	5.51135	8.57392	0.656729	-0.60663	0.012813	down	no
ENSMUSG00000032911	Cspg4	chondroitin sulfate proteoglycan 4 [Source:MGI Symbol;Acc:MGI:2153093]	protein_coding;retained_intron	4.69015	5.22845	5.31738	10.8855	5.44431	6.69881	0.661611	-0.595945	0.0131588	down	no
ENSMUSG00000059325	Hopx	HOP homeobox [Source:MGI Symbol;Acc:MGI:1916782]	protein_coding	3.22879	2.56562	2.59644	5.82667	6.83059	2.67514	0.547262	-0.869696	0.0132164	down	no
ENSMUSG00000068739	Sars	seryl-aminoacyl-tRNA synthetase [Source:MGI Symbol;Acc:MGI:102809]	protein_coding;retained_intron	55.733	53.8577	53.0997	94.5733	70.2966	62.906	0.714256	-0.485486	0.0136291	down	no
ENSMUSG00000047843	Bri3	brain protein I3 [Source:MGI Symbol;Acc:MGI:1933174]	protein_coding;nonsense_mediated_decay	13.9754	15.8584	13.4011	29.7883	19.2575	16.47	0.659916	-0.599645	0.0137533	down	no
ENSMUSG00000030827	Fgf21	fibroblast growth factor 21 [Source:MGI Symbol;Acc:MGI:1861377]	protein_coding	11.3856	11.2618	11.1736	13.7497	17.4563	19.3374	0.669148	-0.579604	0.0139917	down	no
ENSMUSG00000067724	Gbx1	gastrulation brain homeobox 1 [Source:MGI Symbol;Acc:MGI:95667]	protein_coding	0.225433	0.139673	0.183574	0.243995	0.416466	0.464483	0.48774	-1.03582	0.0140577	down	yes
ENSMUSG00000104913	Gm6560	predicted gene 6560 [Source:MGI Symbol;Acc:MGI:3646204]	processed_pseudogene	9.31789	6.15837	7.40306	18.3343	9.89916	9.52996	0.605859	-0.722946	0.0145952	down	no
ENSMUSG00000027957	Slc35a3	solute carrier family 35 (UDP-N-acetylglucosamine (UDP-GlcNAc) transporter), member 3 [Source:MGI Symbol;Acc:MGI:1917648]	protein_coding;processed_transcript;retained_intron	2.59257	0.792912	0.891927	2.18592	3.27517	2.41898	0.542813	-0.881473	0.0151195	down	no
ENSMUSG00000089998	Phtf1os	putative homeodomain transcription factor 1, opposite strand [Source:MGI Symbol;Acc:MGI:3698050]	antisense	0.160221	0.458206	0.635118	0.723503	0.865542	1.06895	0.471612	-1.08433	0.0155452	down	yes
ENSMUSG00000037411	Serpine1	serine (or cysteine) peptidase inhibitor, clade E, member 1 [Source:MGI Symbol;Acc:MGI:97608]	protein_coding;retained_intron	17.0468	16.0997	18.6122	17.9352	25.8466	27.5005	0.726109	-0.461743	0.01556	down	no
ENSMUSG00000060938	Rpl26	ribosomal protein L26 [Source:MGI Symbol;Acc:MGI:106022]	protein_coding;processed_transcript;retained_intron	33.9764	30.9286	31.2572	73.9486	43.9803	31.4318	0.643825	-0.635259	0.0156356	down	no
ENSMUSG00000105868	Gm43766	predicted gene 43766 [Source:MGI Symbol;Acc:MGI:5663903]	TEC	0.00999	0.022711	0.207825	2.35707	0.037009	0.008331	0.100119	-3.32022	0.01573	down	yes
ENSMUSG00000027230	Creb3l1	cAMP responsive element binding protein 3-like 1 [Source:MGI Symbol;Acc:MGI:1347062]	protein_coding	65.9693	66.6252	66.9868	152.451	80.583	71.2031	0.656005	-0.608221	0.0159163	down	no
ENSMUSG00000029364	Wsb2	WD repeat and SOCS box-containing 2 [Source:MGI Symbol;Acc:MGI:2144041]	protein_coding;retained_intron;processed_transcript	23.698	24.0553	22.1337	37.4526	29.645	28.4084	0.731755	-0.450567	0.0160741	down	no
ENSMUSG00000044894	Uqcrq	ubiquinol-cytochrome c reductase, complex III subunit VII [Source:MGI Symbol;Acc:MGI:107807]	protein_coding;processed_transcript	46.2949	42.2084	43.8945	82.0068	53.4195	52.8435	0.703234	-0.507922	0.0162532	down	no
ENSMUSG00000071076	Jund	jun D proto-oncogene [Source:MGI Symbol;Acc:MGI:96648]	protein_coding	36.3745	37.7638	37.1303	77.8454	41.3951	45.2535	0.67643	-0.563987	0.0163046	down	no
ENSMUSG00000046229	Scand1	SCAN domain-containing 1 [Source:MGI Symbol;Acc:MGI:1343132]	protein_coding	4.97825	4.35721	4.89928	11.0059	4.48982	10.2241	0.553455	-0.853461	0.0163795	down	no
ENSMUSG00000044134	Pheta1	PH domain containing endocytic trafficking adaptor 1 [Source:MGI Symbol;Acc:MGI:2442708]	protein_coding	1.33277	2.33121	3.27179	5.04752	3.78688	3.25933	0.573502	-0.80213	0.0170327	down	no
ENSMUSG00000029681	Bcl7b	B cell CLL/lymphoma 7B [Source:MGI Symbol;Acc:MGI:1332238]	protein_coding;retained_intron	7.04464	7.09831	6.79017	12.8612	11.0237	7.25792	0.672165	-0.573112	0.017217	down	no
ENSMUSG00000037185	Krt80	keratin 80 [Source:MGI Symbol;Acc:MGI:1921377]	protein_coding;retained_intron;processed_transcript	7.91236	8.13611	7.49104	15.5837	9.07948	9.50877	0.688855	-0.537727	0.0172658	down	no
ENSMUSG00000073640	Rpl27-ps3	ribosomal protein L27, pseudogene 3 [Source:MGI Symbol;Acc:MGI:3646174]	processed_pseudogene	30.899	15.8854	33.7556	37.9517	38.9596	53.0061	0.619933	-0.689816	0.0174276	down	no
ENSMUSG00000034220	Gpc1	glypican 1 [Source:MGI Symbol;Acc:MGI:1194891]	protein_coding;retained_intron;processed_transcript	168.443	170.501	169.951	335.881	196.163	199.493	0.695651	-0.523564	0.0175342	down	no
ENSMUSG00000056501	Cebpb	CCAAT/enhancer binding protein (C/EBP), beta [Source:MGI Symbol;Acc:MGI:88373]	protein_coding	1.6501	2.16003	1.63407	2.80955	2.75938	3.58063	0.595024	-0.748981	0.0175953	down	no
ENSMUSG00000008035	Mid1ip1	Mid1 interacting protein 1 (gastrulation specific G12-like (zebrafish)) [Source:MGI Symbol;Acc:MGI:1915291]	protein_coding;processed_transcript	30.3433	14.9713	29.3355	37.3103	39.2337	33.8483	0.676225	-0.564424	0.0177286	down	no
ENSMUSG00000020758	Itgb4	integrin beta 4 [Source:MGI Symbol;Acc:MGI:96613]	protein_coding;processed_transcript	0.158389	0.130587	0.164282	0.398849	0.238159	0.218036	0.530099	-0.915666	0.0179548	down	no
ENSMUSG00000082128	Gm11824	predicted gene 11824 [Source:MGI Symbol;Acc:MGI:3651313]	processed_pseudogene	2.12158	1.43327	1.35782	4.71281	2.57612	2.18478	0.518559	-0.947421	0.0181824	down	no
ENSMUSG00000004951	Hspb1	heat shock protein 1 [Source:MGI Symbol;Acc:MGI:96240]	protein_coding	106.311	113.242	98.1581	228.196	116.446	127.518	0.672888	-0.571562	0.0182191	down	no
ENSMUSG00000057666	Gapdh	glyceraldehyde-3-phosphate dehydrogenase [Source:MGI Symbol;Acc:MGI:95640]	retained_intron;protein_coding;processed_transcript	5.0233	26.2963	19.657	41.7862	27.9313	26.6669	0.528889	-0.918964	0.0185182	down	no
ENSMUSG00000108015	Gm32591	predicted gene, 32591 [Source:MGI Symbol;Acc:MGI:5591750]	lincRNA	0.42959	0.189747	0.419047	0.476732	0.687985	1.01052	0.477366	-1.06683	0.0185623	down	yes
ENSMUSG00000025172	Ankrd2	ankyrin repeat domain 2 (stretch responsive muscle) [Source:MGI Symbol;Acc:MGI:1861447]	protein_coding	33.4257	33.2728	34.1719	64.9878	38.9783	41.114	0.695273	-0.524348	0.0186991	down	no
ENSMUSG00000105361	AY036118	cDNA sequence AY036118 [Source:MGI Symbol;Acc:MGI:2158419]	lincRNA	227.84	199.268	216.2	368.71	268.521	252.349	0.723161	-0.467612	0.0187304	down	no
ENSMUSG00000043903	Zfp469	zinc finger protein 469 [Source:MGI Symbol;Acc:MGI:2684868]	lincRNA	2.39166	2.80987	2.39974	6.24487	3.47548	2.81323	0.606473	-0.721486	0.0187797	down	no
ENSMUSG00000106106	CT010467	18s RNA, related sequence 5	rRNA;pseudogene	66.6363	53.5507	58.5364	106.708	74.5074	69.3528	0.713272	-0.487476	0.0190966	down	no
ENSMUSG00000066543	Rpl17-ps9	ribosomal protein L17, pseudogene 9 [Source:MGI Symbol;Acc:MGI:3641818]	processed_pseudogene	25.4594	20.9632	25.2774	65.519	25.0933	29.668	0.596108	-0.746354	0.019191	down	no
ENSMUSG00000036278	Macrod1	MACRO domain containing 1 [Source:MGI Symbol;Acc:MGI:2147583]	protein_coding	14.5214	15.3836	12.9219	34.2637	17.9469	15.347	0.633931	-0.657602	0.0192083	down	no
ENSMUSG00000028959	Fastk	Fas-activated serine/threonine kinase [Source:MGI Symbol;Acc:MGI:1913837]	retained_intron;protein_coding;processed_transcript;nonsense_mediated_decay	9.60375	9.13891	8.88227	12.5543	11.8436	12.6488	0.745679	-0.423373	0.0193158	down	no
ENSMUSG00000038508	Gdf15	growth differentiation factor 15 [Source:MGI Symbol;Acc:MGI:1346047]	protein_coding	1.19674	1.3196	1.51597	3.29848	2.411	1.50533	0.558892	-0.839358	0.0193701	down	no
ENSMUSG00000017754	Pltp	phospholipid transfer protein [Source:MGI Symbol;Acc:MGI:103151]	protein_coding;processed_transcript;retained_intron	21.1594	21.0693	22.0822	48.0632	25.9392	22.6364	0.665478	-0.587538	0.0194682	down	no
ENSMUSG00000015749	Anp32e	acidic (leucine-rich) nuclear phosphoprotein 32 family, member E [Source:MGI Symbol;Acc:MGI:1913721]	protein_coding;retained_intron;nonsense_mediated_decay	18.4685	23.5243	23.8769	21.1854	35.671	35.2974	0.714779	-0.48443	0.0196559	down	no
ENSMUSG00000067825	Pex26	peroxisomal biogenesis factor 26 [Source:MGI Symbol;Acc:MGI:1921293]	protein_coding;nonsense_mediated_decay;retained_intron	0.504966	0.407865	0.973249	0.98593	1.18276	1.15696	0.567132	-0.818244	0.0201548	down	no
ENSMUSG00000031026	Trim66	tripartite motif-containing 66 [Source:MGI Symbol;Acc:MGI:2152406]	protein_coding;processed_transcript	0.0751913	0.0230347	0.0715991	0.0739735	0.129882	0.177231	0.445634	-1.16607	0.0203766	down	yes
ENSMUSG00000037035	Inhbb	inhibin beta-B [Source:MGI Symbol;Acc:MGI:96571]	protein_coding	28.6049	29.4011	26.1273	48.525	34.3882	33.3281	0.723782	-0.466373	0.0204665	down	no
ENSMUSG00000025508	Rplp2	ribosomal protein, large P2 [Source:MGI Symbol;Acc:MGI:1914436]	protein_coding;retained_intron	93.652	87.1338	86.5612	228.528	103.89	89.4151	0.633775	-0.657958	0.0205338	down	no
ENSMUSG00000076441	Ass1	argininosuccinate synthetase 1 [Source:MGI Symbol;Acc:MGI:88090]	protein_coding;retained_intron	17.6273	14.6765	16.8393	36.0805	19.2411	18.217	0.668263	-0.581513	0.0208773	down	no
ENSMUSG00000047810	Ccdc88b	coiled-coil domain containing 88B [Source:MGI Symbol;Acc:MGI:1925567]	protein_coding;retained_intron	0.18664	0.136052	0.175444	0.267659	0.312489	0.325421	0.550081	-0.862284	0.0209391	down	no
ENSMUSG00000027660	Skil	SKI-like [Source:MGI Symbol;Acc:MGI:106203]	protein_coding;retained_intron	5.4197	3.56379	3.65571	4.04179	7.26323	7.08877	0.687145	-0.541314	0.0213015	down	no
ENSMUSG00000025007	Aldh18a1	aldehyde dehydrogenase 18 family, member A1 [Source:MGI Symbol;Acc:MGI:1888908]	protein_coding;retained_intron	21.383	21.1777	20.852	34.748	26.0473	25.1766	0.737597	-0.439095	0.021846	down	no
ENSMUSG00000038729	Akap2	A kinase (PRKA) anchor protein 2 [Source:MGI Symbol;Acc:MGI:1306795]	protein_coding;processed_transcript	10.2551	17.5888	11.3464	16.6661	20.5946	17.4867	0.715839	-0.482293	0.0219622	down	no
ENSMUSG00000109523	Gdf1	growth differentiation factor 1 [Source:MGI Symbol;Acc:MGI:95683]	protein_coding	0.341936	0.836251	0.79498	1.18802	1.38776	1.20339	0.522116	-0.937558	0.0219786	down	no
ENSMUSG00000029406	Pitpnm2	phosphatidylinositol transfer protein, membrane-associated 2 [Source:MGI Symbol;Acc:MGI:1336192]	protein_coding;retained_intron	1.63189	0.920005	1.00167	2.85185	1.74416	1.20349	0.612737	-0.70666	0.0221565	down	no
ENSMUSG00000030208	Emp1	epithelial membrane protein 1 [Source:MGI Symbol;Acc:MGI:107941]	protein_coding;retained_intron;nonsense_mediated_decay	21.2956	19.9826	20.0743	12.2842	97.1305	23.0539	0.463148	-1.11046	0.0223204	down	yes
ENSMUSG00000038670	Mybpc2	myosin binding protein C, fast-type [Source:MGI Symbol;Acc:MGI:1336170]	protein_coding	11.7707	12.9408	12.2875	19.7171	13.8347	16.7356	0.735752	-0.442709	0.0223346	down	no
ENSMUSG00000079677	Fdx1l	ferredoxin 1-like [Source:MGI Symbol;Acc:MGI:1915415]	retained_intron;protein_coding	4.78482	2.88698	3.02225	7.43825	3.55733	7.40723	0.58111	-0.783118	0.022451	down	no
ENSMUSG00000062380	Tubb3	tubulin, beta 3 class III [Source:MGI Symbol;Acc:MGI:107813]	protein_coding	25.3786	22.6732	23.7377	39.9388	30.2147	28.0425	0.731083	-0.451892	0.0224633	down	no
ENSMUSG00000078238	Gm12854	predicted gene 12854 [Source:MGI Symbol;Acc:MGI:3650410]	processed_pseudogene	110.259	104.761	106.301	212.513	126.317	123.633	0.694803	-0.525324	0.0228028	down	no
ENSMUSG00000066809	Gm10180	predicted gene 10180 [Source:MGI Symbol;Acc:MGI:3701608]	processed_pseudogene	24.0044	31.6317	28.2251	76.897	45.3614	30.9336	0.547426	-0.869265	0.0231249	down	no
ENSMUSG00000076258	Gm23935	predicted gene, 23935 [Source:MGI Symbol;Acc:MGI:5453712]	miRNA	14.6029	13.1647	16.0693	22.3573	8.97429	84.2336	0.379326	-1.39849	0.0231349	down	yes
ENSMUSG00000044927	H1fx	H1 histone family, member X [Source:MGI Symbol;Acc:MGI:2685307]	protein_coding	4.25346	3.54726	2.85205	12.4445	3.9839	3.94076	0.522985	-0.935157	0.0232104	down	no
ENSMUSG00000030588	Yif1b	Yip1 interacting factor homolog B (S. cerevisiae) [Source:MGI Symbol;Acc:MGI:1924504]	protein_coding	15.416	15.9588	14.854	39.2075	16.9197	17.0926	0.63137	-0.663442	0.0232517	down	no
ENSMUSG00000117959	AC122861	novel transcript, antisense to Sart1	antisense	0.582394	0.383181	0.626058	1.11338	1.60116	0.552476	0.487183	-1.03746	0.0232645	down	yes
ENSMUSG00000022791	Tnk2	tyrosine kinase, non-receptor, 2 [Source:MGI Symbol;Acc:MGI:1858308]	protein_coding;processed_transcript;retained_intron	3.92585	4.47716	3.6764	8.0966	5.05601	4.49811	0.684358	-0.547177	0.02339	down	no
ENSMUSG00000022565	Plec	plectin [Source:MGI Symbol;Acc:MGI:1277961]	protein_coding;retained_intron	11.9961	11.7201	11.9054	25.5184	13.038	13.4133	0.685432	-0.544914	0.0235661	down	no
ENSMUSG00000009207	Lnpk	lunapark, ER junction formation factor [Source:MGI Symbol;Acc:MGI:1918115]	protein_coding;processed_transcript	1.15058	1.24369	1.38248	1.23148	2.22376	2.21112	0.666521	-0.585278	0.0238161	down	no
ENSMUSG00000037010	Apln	apelin [Source:MGI Symbol;Acc:MGI:1353624]	protein_coding	0.690285	0.544938	0.884845	1.0347	1.34594	1.19465	0.592979	-0.753947	0.0244587	down	no
ENSMUSG00000080054	Rpl12-ps1	ribosomal protein L12, pseudogene 1 [Source:MGI Symbol;Acc:MGI:3646154]	processed_pseudogene	2.08852	2.6516	3.09356	8.58261	3.9293	2.88551	0.508765	-0.974928	0.0245317	down	no
ENSMUSG00000103823	Gm7899	predicted gene 7899 [Source:MGI Symbol;Acc:MGI:3645044]	processed_pseudogene	2.88983	3.31508	2.62763	4.91926	4.68406	3.88046	0.65505	-0.610324	0.0248244	down	no
ENSMUSG00000037887	Dusp8	dual specificity phosphatase 8 [Source:MGI Symbol;Acc:MGI:106626]	protein_coding	3.22365	3.59314	3.69835	5.73263	4.378	4.57971	0.715786	-0.4824	0.0248837	down	no
ENSMUSG00000025020	Slit1	slit guidance ligand 1 [Source:MGI Symbol;Acc:MGI:1315203]	protein_coding;retained_intron	0.0394054	0.0712953	0.0945976	0.152635	0.157919	0.104083	0.495128	-1.01413	0.0250891	down	yes
ENSMUSG00000063628	Gm7665	predicted pseudogene 7665 [Source:MGI Symbol;Acc:MGI:3645651]	processed_pseudogene	43.9417	47.9	44.0743	89.7927	58.9237	52.7595	0.674602	-0.567892	0.0252489	down	no
ENSMUSG00000063556	Gm10132	predicted gene 10132 [Source:MGI Symbol;Acc:MGI:3704449]	processed_pseudogene	63.3344	82.7069	78.9887	156.348	95.0726	78.7081	0.681644	-0.552911	0.0253497	down	no
ENSMUSG00000020766	Galk1	galactokinase 1 [Source:MGI Symbol;Acc:MGI:95730]	protein_coding	24.9994	23.9977	24.053	58.6507	24.729	28.4342	0.653318	-0.614142	0.0258878	down	no
ENSMUSG00000016252	Atp5e	ATP synthase, H+ transporting, mitochondrial F1 complex, epsilon subunit [Source:MGI Symbol;Acc:MGI:1855697]	protein_coding;retained_intron	28.8161	29.3065	28.7454	72.5392	33.8434	28.0998	0.645943	-0.630521	0.0260966	down	no
ENSMUSG00000006356	Crip2	cysteine rich protein 2 [Source:MGI Symbol;Acc:MGI:1915587]	protein_coding;retained_intron	129.948	109.918	110.564	214.677	108.4	174.497	0.704276	-0.505787	0.0261279	down	no
ENSMUSG00000057990	E030024N20Rik	RIKEN cDNA E030024N20 gene [Source:MGI Symbol;Acc:MGI:2442009]	processed_pseudogene	4.11162	3.90234	5.14442	9.58963	7.57393	5.33336	0.584897	-0.773745	0.026238	down	no
ENSMUSG00000055839	Elob	elongin B [Source:MGI Symbol;Acc:MGI:1914923]	processed_transcript;protein_coding;retained_intron;nonsense_mediated_decay	49.5251	46.3867	43.5594	71.2257	68.5131	48.7849	0.739808	-0.434778	0.0262815	down	no
ENSMUSG00000058064	Gm10036	predicted gene 10036 [Source:MGI Symbol;Acc:MGI:3642334]	processed_pseudogene	8.75813	7.88665	8.53722	20.0482	13.6007	8.39637	0.598927	-0.739549	0.0263398	down	no
ENSMUSG00000028776	Tinagl1	tubulointerstitial nephritis antigen-like 1 [Source:MGI Symbol;Acc:MGI:2137617]	retained_intron;protein_coding;nonsense_mediated_decay;processed_transcript	0.600741	0.916568	0.8119	1.29079	1.21151	1.22365	0.625131	-0.677769	0.0264054	down	no
ENSMUSG00000059835	Rpl13-ps3	ribosomal protein L13, pseudogene 3 [Source:MGI Symbol;Acc:MGI:3646682]	processed_pseudogene	2.22662	2.12371	2.09526	4.80874	3.75927	2.67835	0.573128	-0.803072	0.0264081	down	no
ENSMUSG00000058581	Gm5801	predicted pseudogene 5801 [Source:MGI Symbol;Acc:MGI:3646055]	processed_pseudogene	0.943593	1.14385	0.802953	2.55536	1.45089	1.42424	0.532253	-0.909816	0.0264399	down	no
ENSMUSG00000073433	Arhgdig	Rho GDP dissociation inhibitor (GDI) gamma [Source:MGI Symbol;Acc:MGI:108430]	protein_coding;retained_intron;processed_transcript	2.57793	2.62188	2.33693	6.4515	3.15368	3.12903	0.59185	-0.756696	0.0264923	down	no
ENSMUSG00000097397	Gm16861	predicted gene, 16861 [Source:MGI Symbol;Acc:MGI:4439785]	antisense	0.38917	0.411493	0.437386	0.728321	0.703176	0.786568	0.558166	-0.841233	0.0265134	down	no
ENSMUSG00000024909	Efemp2	epidermal growth factor-containing fibulin-like extracellular matrix protein 2 [Source:MGI Symbol;Acc:MGI:1891209]	protein_coding;nonsense_mediated_decay;retained_intron	13.0543	16.6753	17.5643	24.9598	20.2316	18.742	0.739738	-0.434914	0.0269029	down	no
ENSMUSG00000040734	Ppp1r13l	protein phosphatase 1, regulatory subunit 13 like [Source:MGI Symbol;Acc:MGI:3525053]	protein_coding;processed_transcript	9.44487	10.5049	9.09326	25.2316	10.6378	9.83213	0.635495	-0.654048	0.0271973	down	no
ENSMUSG00000026880	Stom	stomatin [Source:MGI Symbol;Acc:MGI:95403]	protein_coding;retained_intron	77.5939	72.3934	75.8951	124.656	91.6969	87.0848	0.744411	-0.425829	0.0272446	down	no
ENSMUSG00000024912	Fosl1	fos-like antigen 1 [Source:MGI Symbol;Acc:MGI:107179]	protein_coding;retained_intron	2.06082	2.03107	1.74652	2.8618	3.48564	2.72073	0.643835	-0.635236	0.0274198	down	no
ENSMUSG00000027694	Gm8325	predicted pseudogene 8325 [Source:MGI Symbol;Acc:MGI:3644852]	processed_transcript;transcribed_processed_pseudogene	22.1777	21.872	7.18943	46.3765	24.6688	21.6622	0.552696	-0.855441	0.0276747	down	no
ENSMUSG00000031490	Eif4ebp1	eukaryotic translation initiation factor 4E binding protein 1 [Source:MGI Symbol;Acc:MGI:103267]	protein_coding;processed_transcript	34.0173	34.2544	33.5579	56.3764	41.1534	39.5202	0.74301	-0.428546	0.0279495	down	no
ENSMUSG00000028613	Lrp8	low density lipoprotein receptor-related protein 8, apolipoprotein e receptor [Source:MGI Symbol;Acc:MGI:1340044]	protein_coding;nonsense_mediated_decay;processed_transcript;retained_intron	0.224058	0.290544	0.239172	0.268185	0.446345	0.556504	0.59304	-0.753798	0.0281869	down	no
ENSMUSG00000020216	Jsrp1	junctional sarcoplasmic reticulum protein 1 [Source:MGI Symbol;Acc:MGI:1916700]	protein_coding;nonsense_mediated_decay	45.398	52.5118	44.4254	106.717	56.7402	47.3963	0.675042	-0.56695	0.028221	down	no
ENSMUSG00000061518	Cox5b	cytochrome c oxidase subunit 5B [Source:MGI Symbol;Acc:MGI:88475]	protein_coding;retained_intron;processed_transcript	48.7975	46.2335	46.6585	84.2875	51.2299	58.8311	0.729049	-0.455913	0.0284743	down	no
ENSMUSG00000049760	2410015M20Rik	RIKEN cDNA 2410015M20 gene [Source:MGI Symbol;Acc:MGI:2442174]	protein_coding;retained_intron;processed_transcript	37.7843	33.7814	38.2035	65.4941	47.3903	38.865	0.723358	-0.467219	0.0287235	down	no
ENSMUSG00000007029	Vars	valyl-tRNA synthetase [Source:MGI Symbol;Acc:MGI:90675]	protein_coding;retained_intron	11.7541	11.278	10.9392	26.258	12.7355	11.6475	0.670827	-0.575988	0.0288544	down	no
ENSMUSG00000010095	Slc3a2	solute carrier family 3 (activators of dibasic and neutral amino acid transport), member 2 [Source:MGI Symbol;Acc:MGI:96955]	protein_coding;retained_intron	49.278	53.2003	45.2036	72.1008	60.1815	61.1559	0.763457	-0.389381	0.0290303	down	no
ENSMUSG00000083679	Gm12892	predicted gene 12892 [Source:MGI Symbol;Acc:MGI:3649649]	processed_pseudogene	0.747004	0.852855	0.741932	3.0345	0.781494	1.04065	0.482183	-1.05235	0.0290381	down	yes
ENSMUSG00000002603	Tgfb1	transforming growth factor, beta 1 [Source:MGI Symbol;Acc:MGI:98725]	protein_coding;nonsense_mediated_decay;processed_transcript;retained_intron	20.9639	20.5797	21.0624	53.1388	22.2072	21.254	0.648095	-0.625723	0.0290589	down	no
ENSMUSG00000093989	Rnasek	ribonuclease, RNase K [Source:MGI Symbol;Acc:MGI:106369]	nonsense_mediated_decay;protein_coding	10.1468	11.0973	13.323	38.5245	12.2504	11.0339	0.55926	-0.838409	0.0291451	down	no
ENSMUSG00000059461	Gm7331	predicted gene 7331 [Source:MGI Symbol;Acc:MGI:3644702]	processed_pseudogene	9.43206	8.18261	9.40404	23.9634	12.2874	9.98132	0.584414	-0.774938	0.0296867	down	no
ENSMUSG00000030432	Rpl28	ribosomal protein L28 [Source:MGI Symbol;Acc:MGI:101839]	protein_coding;retained_intron	228.889	219.878	219.747	471.318	243.273	242.383	0.69857	-0.517523	0.0298052	down	no
ENSMUSG00000006403	Adamts4	a disintegrin-like and metallopeptidase (reprolysin type) with thrombospondin type 1 motif, 4 [Source:MGI Symbol;Acc:MGI:1339949]	protein_coding	14.902	11.813	12.5016	15.9658	18.2475	16.9874	0.765939	-0.384699	0.0301646	down	no
ENSMUSG00000030399	Ckm	creatine kinase, muscle [Source:MGI Symbol;Acc:MGI:88413]	protein_coding;processed_transcript	38.5633	38.0632	37.5245	81.1464	41.3147	41.907	0.694484	-0.525987	0.0302722	down	no
ENSMUSG00000063696	Gm8730	predicted pseudogene 8730 [Source:MGI Symbol;Acc:MGI:3644565]	processed_pseudogene	12.492	6.99639	11.2375	24.6648	12.3322	12.5296	0.62039	-0.688753	0.0303149	down	no
ENSMUSG00000003072	Atp5d	ATP synthase, H+ transporting, mitochondrial F1 complex, delta subunit [Source:MGI Symbol;Acc:MGI:1913293]	protein_coding;processed_transcript	58.7282	57.1692	51.783	140.294	58.3782	58.2298	0.652703	-0.615501	0.030356	down	no
ENSMUSG00000071078	Nr2c2ap	nuclear receptor 2C2-associated protein [Source:MGI Symbol;Acc:MGI:1922942]	protein_coding;retained_intron	7.56102	7.40529	7.23735	13.1038	9.61207	9.14411	0.696914	-0.520947	0.0304651	down	no
ENSMUSG00000029651	Mtus2	microtubule associated tumor suppressor candidate 2 [Source:MGI Symbol;Acc:MGI:1915388]	protein_coding;processed_transcript;retained_intron;nonsense_mediated_decay	0.0461122	0.0359521	0.0357027	0.0501944	0.0937532	0.0818164	0.521638	-0.93888	0.0306136	down	no
ENSMUSG00000029547	Ints1	integrator complex subunit 1 [Source:MGI Symbol;Acc:MGI:1915760]	protein_coding;retained_intron	3.79204	3.75283	4.05452	8.18051	4.28789	4.30242	0.69164	-0.531906	0.0307402	down	no
ENSMUSG00000020475	Pgam2	phosphoglycerate mutase 2 [Source:MGI Symbol;Acc:MGI:1933118]	protein_coding	40.3432	42.0359	35.204	88.1109	43.3103	42.7127	0.675246	-0.566515	0.0308448	down	no
ENSMUSG00000043313	Pcdhb19	protocadherin beta 19 [Source:MGI Symbol;Acc:MGI:2136757]	protein_coding	0.090005	0.475973	0.190146	0.371512	0.565317	0.649772	0.476568	-1.06924	0.0308922	down	yes
ENSMUSG00000074457	S100a16	S100 calcium binding protein A16 [Source:MGI Symbol;Acc:MGI:1915110]	protein_coding;processed_transcript	62.8831	59.9491	37.5276	98.5526	66.1153	62.4493	0.706066	-0.502125	0.0309886	down	no
ENSMUSG00000042292	Mrtfa	myocardin related transcription factor A [Source:MGI Symbol;Acc:MGI:2384495]	protein_coding;retained_intron	4.7436	11.033	9.4005	20.7833	9.46983	9.95207	0.626215	-0.675271	0.031369	down	no
ENSMUSG00000031983	2310022B05Rik	RIKEN cDNA 2310022B05 gene [Source:MGI Symbol;Acc:MGI:1916801]	protein_coding	45.6908	48.5642	43.473	86.1416	50.868	52.8601	0.725382	-0.463187	0.0315189	down	no
ENSMUSG00000033307	Mif	macrophage migration inhibitory factor (glycosylation-inhibiting factor) [Source:MGI Symbol;Acc:MGI:96982]	protein_coding;retained_intron	138.993	129.169	147.558	300.271	143.428	157.91	0.691015	-0.53321	0.0317408	down	no
ENSMUSG00000030268	Bcat1	branched chain aminotransferase 1, cytosolic [Source:MGI Symbol;Acc:MGI:104861]	protein_coding;processed_transcript	4.79591	4.72416	4.8745	6.04722	6.89966	5.76016	0.769473	-0.378056	0.0318806	down	no
ENSMUSG00000022614	Lmf2	lipase maturation factor 2 [Source:MGI Symbol;Acc:MGI:2146015]	protein_coding;retained_intron	12.9452	15.3762	13.1563	26.8775	17.2283	14.1959	0.711431	-0.491204	0.0320663	down	no
ENSMUSG00000028042	Zbtb7b	zinc finger and BTB domain containing 7B [Source:MGI Symbol;Acc:MGI:102755]	protein_coding;processed_transcript	6.81197	5.7565	6.19778	10.1159	7.43352	7.72084	0.742622	-0.429301	0.0322667	down	no
ENSMUSG00000061167	Rpl15-ps3	ribosomal protein L15, pseudogene 3 [Source:MGI Symbol;Acc:MGI:3782952]	processed_pseudogene	45.6614	36.9546	34.1834	94.7733	34.8024	51.5515	0.644848	-0.632969	0.0323218	down	no
ENSMUSG00000022679	Mpv17l	Mpv17 transgene, kidney disease mutant-like [Source:MGI Symbol;Acc:MGI:2135951]	protein_coding;nonsense_mediated_decay	0.510337	0.39374	0.408243	0.444024	0.998618	0.853427	0.57155	-0.807047	0.0328217	down	no
ENSMUSG00000032294	Pkm	pyruvate kinase, muscle [Source:MGI Symbol;Acc:MGI:97591]	protein_coding;retained_intron	259.434	268.037	243.94	463.144	275.019	310.271	0.735775	-0.442663	0.0328502	down	no
ENSMUSG00000118161	AC090881	ribosomal protein S2, pseudogene 8	processed_pseudogene	4.26176	5.9277	4.827	12.9145	6.71874	5.43416	0.599045	-0.739265	0.0328509	down	no
ENSMUSG00000018909	Arrb1	arrestin, beta 1 [Source:MGI Symbol;Acc:MGI:99473]	protein_coding;processed_transcript;retained_intron	0.178423	0.103793	0.251298	0.128113	0.661377	0.339897	0.472393	-1.08194	0.0330263	down	yes
ENSMUSG00000044700	Tmem201	transmembrane protein 201 [Source:MGI Symbol;Acc:MGI:1196277]	protein_coding;retained_intron;processed_transcript	2.73283	1.42053	2.50045	4.99068	2.59546	2.66663	0.648977	-0.623761	0.033096	down	no
ENSMUSG00000085667	Gm12992	predicted gene 12992 [Source:MGI Symbol;Acc:MGI:3702644]	processed_transcript	1.32477	1.44106	2.12246	2.11375	2.55914	2.44813	0.686461	-0.542751	0.0331131	down	no
ENSMUSG00000038954	Supt3	suppressor of Ty 3 [Source:MGI Symbol;Acc:MGI:1923723]	protein_coding;processed_transcript	3.75742	3.42059	3.61446	6.8892	4.22602	4.37244	0.696843	-0.521095	0.0332544	down	no
ENSMUSG00000078965	Gm12033	predicted gene 12033 [Source:MGI Symbol;Acc:MGI:3650772]	processed_pseudogene	202.676	211.218	98.6346	340.403	188.237	235.313	0.67089	-0.575851	0.0334811	down	no
ENSMUSG00000080859	Rpl10-ps1	ribosomal protein L10, pseudogene 1 [Source:MGI Symbol;Acc:MGI:3650909]	transcribed_processed_pseudogene	5.84185	6.98412	7.19459	26.2158	6.28937	6.4484	0.513959	-0.960275	0.033573	down	no
ENSMUSG00000078636	Gm7336	predicted gene 7336 [Source:MGI Symbol;Acc:MGI:3644851]	processed_pseudogene	243.733	231.126	222.511	510.593	226.278	271.12	0.691841	-0.531487	0.0336048	down	no
ENSMUSG00000037366	Pafah2	platelet-activating factor acetylhydrolase 2 [Source:MGI Symbol;Acc:MGI:2140321]	protein_coding;processed_transcript	1.30215	2.29985	1.37074	2.31037	2.62871	2.68614	0.652144	-0.616738	0.0336517	down	no
ENSMUSG00000029752	Asns	asparagine synthetase [Source:MGI Symbol;Acc:MGI:1350929]	protein_coding;retained_intron;processed_transcript	56.3271	52.3081	53.0936	79.3328	67.1646	63.3874	0.77056	-0.376021	0.0337428	down	no
ENSMUSG00000034993	Vat1	vesicle amine transport 1 [Source:MGI Symbol;Acc:MGI:1349450]	protein_coding	124.296	122.224	118.036	249.98	129.342	134.066	0.710099	-0.493908	0.0339856	down	no
ENSMUSG00000001751	Naglu	alpha-N-acetylglucosaminidase (Sanfilippo disease IIIB) [Source:MGI Symbol;Acc:MGI:1351641]	protein_coding;processed_transcript	9.94998	9.43586	9.27889	16.3127	10.6319	12.3029	0.730357	-0.453327	0.0344479	down	no
ENSMUSG00000078377	Gm4294	predicted gene 4294 [Source:MGI Symbol;Acc:MGI:3782472]	processed_pseudogene	118.816	86.0164	88.3775	195.646	102.308	118.861	0.703454	-0.507473	0.0346284	down	no
ENSMUSG00000009214	Mymk	myomaker, myoblast fusion factor [Source:MGI Symbol;Acc:MGI:1913389]	protein_coding	323	342.853	315.396	667.885	348.154	361.217	0.712467	-0.489106	0.0349621	down	no
ENSMUSG00000107951	Gm6210	predicted gene 6210 [Source:MGI Symbol;Acc:MGI:3643375]	processed_pseudogene	2.44509	2.85265	2.50237	6.52703	2.66121	3.52219	0.613678	-0.704446	0.0351817	down	no
ENSMUSG00000064372	mt-Tp	mitochondrially encoded tRNA proline [Source:MGI Symbol;Acc:MGI:102478]	Mt_tRNA	82.3231	106.617	110.421	305.954	149.904	72.1705	0.56694	-0.818731	0.0352555	down	no
ENSMUSG00000028743	Akr7a5	aldo-keto reductase family 7, member A5 (aflatoxin aldehyde reductase) [Source:MGI Symbol;Acc:MGI:107796]	protein_coding;processed_transcript	8.89915	8.26563	8.40955	20.0622	9.19593	9.41908	0.661225	-0.596787	0.0353266	down	no
ENSMUSG00000056749	Nfil3	nuclear factor, interleukin 3, regulated [Source:MGI Symbol;Acc:MGI:109495]	protein_coding	14.7327	15.7954	13.7728	25.2329	18.2781	16.9122	0.733178	-0.447764	0.0353433	down	no
ENSMUSG00000045216	Hs6st1	heparan sulfate 6-O-sulfotransferase 1 [Source:MGI Symbol;Acc:MGI:1354958]	protein_coding;retained_intron	14.6503	14.5758	15.8887	25.1205	17.2935	17.6522	0.751086	-0.41295	0.0355249	down	no
ENSMUSG00000022195	6030458C11Rik	RIKEN cDNA 6030458C11 gene [Source:MGI Symbol;Acc:MGI:1925127]	protein_coding;retained_intron;processed_transcript	5.75511	7.21479	7.22139	5.78403	11.0125	11.3582	0.717153	-0.479648	0.0355525	down	no
ENSMUSG00000067288	Rps28	ribosomal protein S28 [Source:MGI Symbol;Acc:MGI:1859516]	protein_coding;processed_transcript;retained_intron	52.7891	50.4473	50.5409	104.919	55.9118	55.4816	0.710905	-0.492272	0.0357651	down	no
ENSMUSG00000068629	Gm6155	predicted pseudogene 6155 [Source:MGI Symbol;Acc:MGI:3643981]	processed_pseudogene	3.61645	3.28736	3.19484	7.58435	5.24759	4.361	0.587372	-0.767654	0.0366288	down	no
ENSMUSG00000042529	Kcnj12	potassium inwardly-rectifying channel, subfamily J, member 12 [Source:MGI Symbol;Acc:MGI:108495]	protein_coding	1.19235	1.02711	0.83178	2.13299	1.2915	1.51297	0.617978	-0.694373	0.0367353	down	no
ENSMUSG00000006517	Mvd	mevalonate (diphospho) decarboxylase [Source:MGI Symbol;Acc:MGI:2179327]	protein_coding;nonsense_mediated_decay	9.27718	8.49911	9.65332	15.3007	9.7846	12.8147	0.723738	-0.46646	0.0369328	down	no
ENSMUSG00000040139	9430038I01Rik	RIKEN cDNA 9430038I01 gene [Source:MGI Symbol;Acc:MGI:1924502]	protein_coding;processed_transcript;retained_intron	0.182095	0.212695	0.19722	0.320644	0.325186	0.336448	0.602692	-0.730507	0.0369697	down	no
ENSMUSG00000068270	Shroom4	shroom family member 4 [Source:MGI Symbol;Acc:MGI:2685570]	protein_coding	0.612068	0.250109	0.293297	0.503459	0.725418	0.736047	0.58805	-0.765989	0.0370603	down	no
ENSMUSG00000020211	Sf3a2	splicing factor 3a, subunit 2 [Source:MGI Symbol;Acc:MGI:104912]	protein_coding;retained_intron	14.5349	15.3833	14.0061	37.0374	14.6737	15.197	0.656487	-0.607161	0.0370629	down	no
ENSMUSG00000001506	Col1a1	collagen, type I, alpha 1 [Source:MGI Symbol;Acc:MGI:88467]	protein_coding;retained_intron;processed_transcript	134.425	134.844	139.875	278.195	160.799	134.504	0.713418	-0.487181	0.0373408	down	no
ENSMUSG00000048489	Depp1	DEPP1 autophagy regulator [Source:MGI Symbol;Acc:MGI:1918730]	protein_coding	4.02361	4.35151	4.2796	5.81593	6.08093	6.47468	0.688822	-0.537798	0.0375525	down	no
ENSMUSG00000001036	Epn2	epsin 2 [Source:MGI Symbol;Acc:MGI:1333766]	protein_coding;processed_transcript;retained_intron	12.151	3.67944	4.94087	10.7315	10.8724	11.3271	0.630754	-0.664851	0.0376138	down	no
ENSMUSG00000024208	Uqcc2	ubiquinol-cytochrome c reductase complex assembly factor 2 [Source:MGI Symbol;Acc:MGI:1914517]	protein_coding;processed_transcript	69.4271	64.7855	65.3356	145.291	74.4237	67.188	0.695526	-0.523823	0.0376917	down	no
ENSMUSG00000022671	Mzt2	mitotic spindle organizing protein 2 [Source:MGI Symbol;Acc:MGI:1922845]	protein_coding;retained_intron	8.0247	7.87672	7.55593	11.1459	7.97987	15.203	0.683314	-0.54938	0.0376961	down	no
ENSMUSG00000083411	Rpl30-ps10	ribosomal protein L30, pseudogene 10 [Source:MGI Symbol;Acc:MGI:3646270]	processed_pseudogene	46.4618	50.049	9.44854	48.8894	110.675	46.5015	0.514201	-0.959595	0.0378106	down	no
ENSMUSG00000083380	Ndufb4c	NADH:ubiquinone oxidoreductase subunit B4C [Source:MGI Symbol;Acc:MGI:3781422]	processed_pseudogene	8.11385	5.18893	7.79387	9.42895	22.4912	6.69018	0.546399	-0.871972	0.0379359	down	no
ENSMUSG00000044477	Zfand3	zinc finger, AN1-type domain 3 [Source:MGI Symbol;Acc:MGI:1096572]	protein_coding;processed_transcript;nonsense_mediated_decay	30.0051	15.1708	27.8198	42.3619	31.8315	29.0042	0.707339	-0.499526	0.0384292	down	no
ENSMUSG00000000555	Itga5	integrin alpha 5 (fibronectin receptor alpha) [Source:MGI Symbol;Acc:MGI:96604]	protein_coding;retained_intron;nonsense_mediated_decay	62.1064	62.0311	61.2672	136.022	64.0247	65.3127	0.698694	-0.517267	0.038459	down	no
ENSMUSG00000027737	Slc7a11	solute carrier family 7 (cationic amino acid transporter, y+ system), member 11 [Source:MGI Symbol;Acc:MGI:1347355]	protein_coding;processed_transcript;retained_intron	5.63418	4.8953	5.11501	9.19595	5.82105	6.05812	0.74232	-0.429887	0.0384952	down	no
ENSMUSG00000039001	Rps21	ribosomal protein S21 [Source:MGI Symbol;Acc:MGI:1913731]	retained_intron;protein_coding	131.404	121.733	125.242	267.893	153.199	118.798	0.700845	-0.512833	0.0385366	down	no
ENSMUSG00000101939	Gm28438	predicted gene 28438 [Source:MGI Symbol;Acc:MGI:5579144]	unprocessed_pseudogene	613.395	570.709	578.548	1329.77	727.035	518.399	0.68447	-0.54694	0.0386623	down	no
ENSMUSG00000054312	Mrps21	mitochondrial ribosomal protein S21 [Source:MGI Symbol;Acc:MGI:1913542]	protein_coding;processed_transcript	44.0388	76.8349	71.482	104.381	78.5801	80.159	0.731057	-0.451944	0.0389359	down	no
ENSMUSG00000039824	Myl6b	myosin, light polypeptide 6B [Source:MGI Symbol;Acc:MGI:1917789]	protein_coding;retained_intron	24.6598	29.9105	26.2549	63.7545	27.908	28.0297	0.675275	-0.566454	0.0391333	down	no
ENSMUSG00000029777	Gars	glycyl-tRNA synthetase [Source:MGI Symbol;Acc:MGI:2449057]	protein_coding;retained_intron	94.4774	94.808	93.6724	144.469	113.997	106.752	0.774766	-0.368168	0.0393035	down	no
ENSMUSG00000023046	Igfbp6	insulin-like growth factor binding protein 6 [Source:MGI Symbol;Acc:MGI:96441]	protein_coding	96.9625	92.9114	98.1993	179.294	108.055	104.989	0.734247	-0.445663	0.0393896	down	no
ENSMUSG00000002778	Kdelr1	KDEL (Lys-Asp-Glu-Leu) endoplasmic reticulum protein retention receptor 1 [Source:MGI Symbol;Acc:MGI:1915387]	protein_coding;retained_intron	30.8219	33.3247	24.7484	54.9325	32.3855	34.7325	0.728346	-0.457304	0.039579	down	no
ENSMUSG00000075706	Gpx4	glutathione peroxidase 4 [Source:MGI Symbol;Acc:MGI:104767]	processed_transcript;protein_coding;retained_intron	185.445	175.427	174.288	344.246	198.648	189.66	0.730542	-0.452962	0.0396491	down	no
ENSMUSG00000002393	Nr2f6	nuclear receptor subfamily 2, group F, member 6 [Source:MGI Symbol;Acc:MGI:1352453]	protein_coding;processed_transcript	4.58232	3.91856	3.72118	9.5483	4.15294	4.97563	0.654395	-0.611765	0.0398698	down	no
ENSMUSG00000055044	Pdlim1	PDZ and LIM domain 1 (elfin) [Source:MGI Symbol;Acc:MGI:1860611]	protein_coding;retained_intron	12.8346	16.4263	12.2855	18.8537	17.5287	17.4167	0.77225	-0.372861	0.0400085	down	no
ENSMUSG00000033209	Ttc28	tetratricopeptide repeat domain 28 [Source:MGI Symbol;Acc:MGI:2140873]	protein_coding;retained_intron;processed_transcript	2.50606	1.96724	3.92382	7.10251	3.90983	2.34936	0.628447	-0.670137	0.0401774	down	no
ENSMUSG00000032633	Flcn	folliculin [Source:MGI Symbol;Acc:MGI:2442184]	retained_intron;protein_coding;processed_transcript	9.31034	5.7104	5.42367	7.40101	10.5927	10.5497	0.716257	-0.481451	0.0403644	down	no
ENSMUSG00000031706	Rfx1	regulatory factor X, 1 (influences HLA class II expression) [Source:MGI Symbol;Acc:MGI:105982]	protein_coding;retained_intron	1.92664	1.83133	2.2046	3.45248	2.47941	2.4453	0.711763	-0.490532	0.0403685	down	no
ENSMUSG00000072772	Grcc10	gene rich cluster, C10 gene [Source:MGI Symbol;Acc:MGI:1315201]	protein_coding;retained_intron;processed_transcript	16.2049	17.1664	17.0822	26.6052	17.1681	23.6157	0.748691	-0.417558	0.0404126	down	no
ENSMUSG00000059743	Fdps	farnesyl diphosphate synthetase [Source:MGI Symbol;Acc:MGI:104888]	protein_coding;retained_intron	27.9278	27.9367	26.2087	40.6573	32.1243	33.1196	0.774998	-0.367735	0.0407196	down	no
ENSMUSG00000113151	Gm48690	predicted gene, 48690 [Source:MGI Symbol;Acc:MGI:6098319]	processed_pseudogene	1.61166	1.99946	1.5374	3.86192	3.35072	2.17658	0.548344	-0.866848	0.0408639	down	no
ENSMUSG00000028893	Sesn2	sestrin 2 [Source:MGI Symbol;Acc:MGI:2651874]	protein_coding	7.1861	7.01467	7.25336	11.4694	8.75598	8.41799	0.749009	-0.416944	0.0413027	down	no
ENSMUSG00000025651	Uqcrc1	ubiquinol-cytochrome c reductase core protein 1 [Source:MGI Symbol;Acc:MGI:107876]	protein_coding;retained_intron;nonsense_mediated_decay	34.4273	35.8571	31.9033	67.7346	37.1714	36.354	0.723401	-0.467132	0.041361	down	no
ENSMUSG00000030602	Pak4	p21 (RAC1) activated kinase 4 [Source:MGI Symbol;Acc:MGI:1917834]	protein_coding;processed_transcript;retained_intron	3.52814	4.43796	6.57057	12.2438	4.19563	6.64342	0.629759	-0.667127	0.0414092	down	no
ENSMUSG00000048772	Tmem53	transmembrane protein 53 [Source:MGI Symbol;Acc:MGI:1916027]	protein_coding;processed_transcript	2.5551	2.62105	3.07726	5.43489	3.55698	3.55099	0.658016	-0.603805	0.0419142	down	no
ENSMUSG00000059040	Eno1b	enolase 1B, retrotransposed [Source:MGI Symbol;Acc:MGI:3648653]	protein_coding	149.56	136.818	128.38	252.002	143.989	162.006	0.743299	-0.427986	0.04249	down	no
ENSMUSG00000035863	Palm	paralemmin [Source:MGI Symbol;Acc:MGI:1261814]	protein_coding;processed_transcript	15.0277	15.4939	14.3851	31.205	16.8954	14.9049	0.712746	-0.48854	0.0425852	down	no
ENSMUSG00000024327	Slc39a7	solute carrier family 39 (zinc transporter), member 7 [Source:MGI Symbol;Acc:MGI:95909]	retained_intron;protein_coding;processed_transcript	36.9751	39.1612	37.0263	68.7521	46.841	37.3968	0.739674	-0.435038	0.043052	down	no
ENSMUSG00000025855	Prkar1b	protein kinase, cAMP dependent regulatory, type I beta [Source:MGI Symbol;Acc:MGI:97759]	protein_coding;processed_transcript	0.241675	0.0889555	0.20305	0.40283	0.247911	0.347523	0.534608	-0.903446	0.0430889	down	no
ENSMUSG00000021493	Pdlim7	PDZ and LIM domain 7 [Source:MGI Symbol;Acc:MGI:1914649]	protein_coding;retained_intron;nonsense_mediated_decay	23.5091	20.8316	23.2276	37.6131	24.0143	27.7044	0.756375	-0.402827	0.0431272	down	no
ENSMUSG00000046440	Gm5564	predicted gene 5564 [Source:MGI Symbol;Acc:MGI:3645018]	processed_pseudogene	3.43047	3.2883	1.88196	3.02248	4.83267	6.51398	0.598556	-0.740441	0.0433277	down	no
ENSMUSG00000084345	Rpl17-ps4	ribosomal protein L17, pseudogene 4 [Source:MGI Symbol;Acc:MGI:3651043]	processed_pseudogene	9.8336	9.45355	9.79218	22.3934	12.5918	10.3184	0.641876	-0.639634	0.0433814	down	no
ENSMUSG00000051118	Olfr77	olfactory receptor 77 [Source:MGI Symbol;Acc:MGI:2153206]	protein_coding	0.133301	0.093938	0.202694	0.476539	0.14742	0.197214	0.52356	-0.933574	0.0435845	down	no
ENSMUSG00000002343	Armc6	armadillo repeat containing 6 [Source:MGI Symbol;Acc:MGI:1924063]	protein_coding;retained_intron	3.46392	3.78084	4.64954	6.91427	4.7335	5.08484	0.710846	-0.492391	0.0437747	down	no
ENSMUSG00000012889	Podnl1	podocan-like 1 [Source:MGI Symbol;Acc:MGI:2685352]	protein_coding;retained_intron	10.0113	10.2588	11.2708	17.0352	12.5741	12.0729	0.756699	-0.402208	0.0438423	down	no
ENSMUSG00000020135	Apc2	adenomatosis polyposis coli 2 [Source:MGI Symbol;Acc:MGI:1346052]	protein_coding;retained_intron	0.165011	0.0970666	0.169421	0.364485	0.193426	0.1905	0.576553	-0.794474	0.0441719	down	no
ENSMUSG00000064337	mt-Rnr1	mitochondrially encoded 12S rRNA [Source:MGI Symbol;Acc:MGI:102493]	Mt_rRNA	127.132	119.893	129.523	325.566	144.595	103.236	0.656696	-0.606703	0.0442739	down	no
ENSMUSG00000091957	Rps2-ps10	ribosomal protein S2, pseudogene 10 [Source:MGI Symbol;Acc:MGI:3645604]	processed_transcript;transcribed_processed_pseudogene	339.914	377.724	353.142	489.977	370.668	509.445	0.78154	-0.355608	0.0443276	down	no
ENSMUSG00000018983	E2f2	E2F transcription factor 2 [Source:MGI Symbol;Acc:MGI:1096341]	protein_coding;processed_transcript	8.90512	9.03615	8.78301	14.3301	10.3387	10.361	0.762901	-0.390432	0.0444518	down	no
ENSMUSG00000028763	Hspg2	perlecan (heparan sulfate proteoglycan 2) [Source:MGI Symbol;Acc:MGI:96257]	protein_coding;processed_transcript	58.6915	58.6923	58.1656	116.033	60.0665	64.8231	0.728654	-0.456695	0.0444637	down	no
ENSMUSG00000030956	Fam53b	family with sequence similarity 53, member B [Source:MGI Symbol;Acc:MGI:1925188]	protein_coding;processed_transcript	1.23345	5.60378	2.86626	6.79682	4.7613	4.60064	0.600509	-0.735741	0.0445111	down	no
ENSMUSG00000051985	Igfn1	immunoglobulin-like and fibronectin type III domain containing 1 [Source:MGI Symbol;Acc:MGI:3045352]	protein_coding;nonsense_mediated_decay	2.21972	3.26507	2.67105	3.02157	3.46482	4.50576	0.741969	-0.430568	0.0445658	down	no
ENSMUSG00000038086	Hspb2	heat shock protein 2 [Source:MGI Symbol;Acc:MGI:1916503]	protein_coding	56.4199	52.8098	56.9838	92.3612	64.2783	62.3592	0.75897	-0.397884	0.0445889	down	no
ENSMUSG00000033423	Eri3	exoribonuclease 3 [Source:MGI Symbol;Acc:MGI:2153887]	protein_coding;processed_transcript	22.2915	22.6461	20.9832	40.7612	23.7762	24.5228	0.740182	-0.434048	0.0447024	down	no
ENSMUSG00000031029	Eif3f	eukaryotic translation initiation factor 3, subunit F [Source:MGI Symbol;Acc:MGI:1913335]	protein_coding;retained_intron	45.0405	45.7205	43.4352	97.8773	48.6074	44.006	0.704476	-0.505377	0.0448324	down	no
ENSMUSG00000029705	Cux1	cut-like homeobox 1 [Source:MGI Symbol;Acc:MGI:88568]	protein_coding;nonsense_mediated_decay;retained_intron;processed_transcript	4.19543	3.4366	4.13205	6.60689	4.438	4.53089	0.75528	-0.404917	0.0448689	down	no
ENSMUSG00000053317	Sec61b	Sec61 beta subunit [Source:MGI Symbol;Acc:MGI:1913462]	protein_coding;retained_intron	24.5238	22.6369	26.1446	40.015	28.9707	28.5728	0.751399	-0.412349	0.0448713	down	no
ENSMUSG00000023707	Ogfod2	2-oxoglutarate and iron-dependent oxygenase domain containing 2 [Source:MGI Symbol;Acc:MGI:1913877]	protein_coding;retained_intron;nonsense_mediated_decay	1.81071	1.99273	1.63407	2.18727	3.23859	2.72962	0.666731	-0.584822	0.0449627	down	no
ENSMUSG00000020150	Gamt	guanidinoacetate methyltransferase [Source:MGI Symbol;Acc:MGI:1098221]	protein_coding;retained_intron	17.0919	14.7504	14.4442	30.0904	17.7398	16.8064	0.716103	-0.481761	0.045024	down	no
ENSMUSG00000034685	Fam171a2	family with sequence similarity 171, member A2 [Source:MGI Symbol;Acc:MGI:2448496]	protein_coding;processed_transcript	22.0179	21.6326	20.1912	41.2646	22.3853	23.684	0.731007	-0.452044	0.0452511	down	no
ENSMUSG00000022335	Zfat	zinc finger and AT hook domain containing [Source:MGI Symbol;Acc:MGI:2681865]	protein_coding;processed_transcript;retained_intron	0.712667	0.58606	0.758835	1.05825	0.808012	1.17864	0.67574	-0.565459	0.0454661	down	no
ENSMUSG00000005447	Pafah1b3	platelet-activating factor acetylhydrolase, isoform 1b, subunit 3 [Source:MGI Symbol;Acc:MGI:108414]	protein_coding;retained_intron;processed_transcript	5.89521	6.00342	5.87523	10.5134	6.95879	7.36463	0.715625	-0.482724	0.0455914	down	no
ENSMUSG00000043687	1190005I06Rik	RIKEN cDNA 1190005I06 gene [Source:MGI Symbol;Acc:MGI:1916168]	protein_coding;nonsense_mediated_decay	0.829022	1.99022	1.46866	3.60815	1.79945	2.15926	0.566668	-0.819423	0.0456723	down	no
ENSMUSG00000025511	Tspan4	tetraspanin 4 [Source:MGI Symbol;Acc:MGI:1928097]	protein_coding;retained_intron	27.3614	25.1314	26.6684	51.3012	26.6158	30.5537	0.729794	-0.454438	0.0459148	down	no
ENSMUSG00000015804	Med28	mediator complex subunit 28 [Source:MGI Symbol;Acc:MGI:1914249]	protein_coding;retained_intron;processed_transcript	3.78377	3.90183	3.95499	4.2531	8.84843	3.8018	0.688657	-0.538143	0.0460372	down	no
ENSMUSG00000004939	Nmrk2	nicotinamide riboside kinase 2 [Source:MGI Symbol;Acc:MGI:1916814]	protein_coding	5.15327	5.05193	4.45028	6.03288	6.47506	7.7924	0.721933	-0.470064	0.0461118	down	no
ENSMUSG00000075591	Gm10874	predicted gene 10874 [Source:MGI Symbol;Acc:MGI:3704261]	lincRNA	1.74435	2.43719	1.99892	4.50753	2.25578	2.81501	0.645256	-0.632057	0.0461335	down	no
ENSMUSG00000030785	Cox6a2	cytochrome c oxidase subunit 6A2 [Source:MGI Symbol;Acc:MGI:104649]	protein_coding	37.4929	40.0761	35.0676	63.0586	39.1789	49.4405	0.742604	-0.429335	0.0464353	down	no
ENSMUSG00000004929	Thop1	thimet oligopeptidase 1 [Source:MGI Symbol;Acc:MGI:1354165]	protein_coding;retained_intron;processed_transcript	16.1528	15.9775	15.7792	33.9501	16.1494	17.1744	0.712155	-0.489737	0.046535	down	no
ENSMUSG00000027803	Wwtr1	WW domain containing transcription regulator 1 [Source:MGI Symbol;Acc:MGI:1917649]	protein_coding	53.2359	30.6538	30.2333	49.3793	52.2667	51.119	0.747049	-0.420725	0.0466411	down	no
ENSMUSG00000025150	Cbr2	carbonyl reductase 2 [Source:MGI Symbol;Acc:MGI:107200]	protein_coding;retained_intron	13.9705	12.434	14.0595	27.1137	14.395	15.6401	0.708047	-0.498083	0.0467265	down	no
ENSMUSG00000018821	Avpi1	arginine vasopressin-induced 1 [Source:MGI Symbol;Acc:MGI:1916784]	protein_coding	18.9433	20.3403	17.99	33.7274	22.2186	21.6866	0.737751	-0.438793	0.0468323	down	no
ENSMUSG00000029363	Rfc5	replication factor C (activator 1) 5 [Source:MGI Symbol;Acc:MGI:1919401]	protein_coding;retained_intron	2.84819	2.55667	2.7374	4.09004	3.34204	3.66091	0.734001	-0.446146	0.0469775	down	no
ENSMUSG00000041120	Nbl1	neuroblastoma, suppression of tumorigenicity 1 [Source:MGI Symbol;Acc:MGI:104591]	protein_coding;processed_transcript	84.2786	84.5189	78.5944	170.338	88.4554	84.6818	0.72026	-0.47341	0.0471006	down	no
ENSMUSG00000109610	Gm7432	predicted gene 7432 [Source:MGI Symbol;Acc:MGI:3645713]	processed_pseudogene	30.9322	23.2325	28.6509	44.8791	35.2747	31.0836	0.744494	-0.425669	0.0471119	down	no
ENSMUSG00000074247	Dda1	DET1 and DDB1 associated 1 [Source:MGI Symbol;Acc:MGI:1913748]	protein_coding;retained_intron;processed_transcript	9.32137	11.5657	11.1268	17.3149	13.4249	11.9419	0.750061	-0.414921	0.0471984	down	no
ENSMUSG00000019158	Tmem160	transmembrane protein 160 [Source:MGI Symbol;Acc:MGI:1916344]	protein_coding;nonsense_mediated_decay	8.51647	8.17602	8.20423	21.5109	9.26923	8.36145	0.636068	-0.652747	0.0478121	down	no
ENSMUSG00000090610	Gm3571	predicted gene 3571 [Source:MGI Symbol;Acc:MGI:3781748]	processed_pseudogene	13.6401	10.9177	11.6059	19.1984	14.0033	16.5715	0.72657	-0.460827	0.0482371	down	no
ENSMUSG00000050708	Ftl1	ferritin light polypeptide 1 [Source:MGI Symbol;Acc:MGI:95589]	nonsense_mediated_decay;protein_coding;retained_intron;processed_transcript	371.539	359.807	324.543	656.963	401.604	360.878	0.743874	-0.426869	0.0482498	down	no
ENSMUSG00000020101	Vsir	V-set immunoregulatory receptor [Source:MGI Symbol;Acc:MGI:1921298]	protein_coding;processed_transcript;retained_intron	1.53313	1.63485	1.83706	1.7326	4.40548	1.74296	0.635073	-0.655005	0.0483047	down	no
ENSMUSG00000045252	Zfp574	zinc finger protein 574 [Source:MGI Symbol;Acc:MGI:2442951]	protein_coding;processed_transcript	1.80905	1.69883	1.63224	2.93043	2.01854	2.28178	0.710869	-0.492344	0.0483132	down	no
ENSMUSG00000110275	Gm5905	predicted gene 5905 [Source:MGI Symbol;Acc:MGI:3647422]	processed_pseudogene	15.3265	16.3889	15.4548	31.7883	18.9139	17.6739	0.689865	-0.535615	0.0484004	down	no
ENSMUSG00000109933	Gm7600	predicted gene 7600 [Source:MGI Symbol;Acc:MGI:3647502]	processed_pseudogene	2.5496	2.56945	1.52107	4.32376	4.62557	2.27899	0.591372	-0.757861	0.0486202	down	no
ENSMUSG00000006457	Actn3	actinin alpha 3 [Source:MGI Symbol;Acc:MGI:99678]	protein_coding;retained_intron	153.994	156.576	149.259	284.383	157.63	173.596	0.74695	-0.420917	0.0488093	down	no
ENSMUSG00000086240	Gm7846	predicted gene 7846 [Source:MGI Symbol;Acc:MGI:3645212]	processed_pseudogene	8.6912	11.9785	9.30748	16.9802	15.2659	13.7159	0.652217	-0.616576	0.0488352	down	no
ENSMUSG00000028923	Necap2	NECAP endocytosis associated 2 [Source:MGI Symbol;Acc:MGI:1913397]	protein_coding;retained_intron;nonsense_mediated_decay;processed_transcript	13.5056	12.4055	12.7126	22.0403	14.4713	14.6994	0.754208	-0.406965	0.0488715	down	no
ENSMUSG00000034445	Cyb561a3	cytochrome b561 family, member A3 [Source:MGI Symbol;Acc:MGI:2686925]	protein_coding;nonsense_mediated_decay	3.58752	3.33911	3.6129	4.26417	5.31517	4.61287	0.742628	-0.429289	0.0489028	down	no
ENSMUSG00000017561	Crlf3	cytokine receptor-like factor 3 [Source:MGI Symbol;Acc:MGI:1860086]	protein_coding;processed_transcript;nonsense_mediated_decay;retained_intron	5.48406	2.78365	2.56283	3.91166	5.87435	6.19638	0.677655	-0.561378	0.0489464	down	no
ENSMUSG00000019718	L3hypdh	L-3-hydroxyproline dehydratase (trans-) [Source:MGI Symbol;Acc:MGI:1914467]	protein_coding;processed_transcript;retained_intron	1.10561	0.95963	1.38749	1.33837	1.89875	2.10317	0.646543	-0.629183	0.0489629	down	no
ENSMUSG00000004931	Apba3	amyloid beta (A4) precursor protein-binding, family A, member 3 [Source:MGI Symbol;Acc:MGI:1888527]	retained_intron;protein_coding;processed_transcript	4.23908	4.39544	4.38759	8.48149	4.49264	5.60782	0.700794	-0.512939	0.0489963	down	no
ENSMUSG00000037280	Galnt6	polypeptide N-acetylgalactosaminyltransferase 6 [Source:MGI Symbol;Acc:MGI:1891640]	protein_coding	4.1185	3.84408	3.99519	5.97865	4.86013	5.13831	0.748432	-0.418057	0.049014	down	no
ENSMUSG00000070509	Rgma	repulsive guidance molecule family member A [Source:MGI Symbol;Acc:MGI:2679262]	protein_coding;retained_intron	7.11113	8.08752	7.93386	15.4609	8.59957	7.85417	0.724824	-0.464297	0.0490612	down	no
ENSMUSG00000020902	Ntn1	netrin 1 [Source:MGI Symbol;Acc:MGI:105088]	protein_coding	0.853083	9.14024	1.35271	7.61192	8.13363	8.80622	0.462127	-1.11364	0.0490964	down	yes
ENSMUSG00000020308	Tpgs1	tubulin polyglutamylase complex subunit 1 [Source:MGI Symbol;Acc:MGI:106618]	protein_coding;processed_transcript	6.80453	7.69188	6.59699	14.8699	7.96218	8.09814	0.681968	-0.552224	0.0491294	down	no
ENSMUSG00000090553	Snrpe	small nuclear ribonucleoprotein E [Source:MGI Symbol;Acc:MGI:98346]	protein_coding;nonsense_mediated_decay	20.0989	13.6465	24.1621	31.1369	21.9857	26.3105	0.72901	-0.45599	0.04916	down	no
ENSMUSG00000076433	Cep295nl	CEP295 N-terminal like [Source:MGI Symbol;Acc:MGI:1929713]	protein_coding	0.396864	0.402638	0.432006	0.778812	0.763805	0.524921	0.59564	-0.747488	0.0491701	down	no
ENSMUSG00000050288	Fzd2	frizzled class receptor 2 [Source:MGI Symbol;Acc:MGI:1888513]	protein_coding	18.058	16.9257	17.9247	26.4868	19.4364	22.0033	0.778906	-0.360478	0.0493502	down	no
ENSMUSG00000026278	Bok	BCL2-related ovarian killer [Source:MGI Symbol;Acc:MGI:1858494]	protein_coding;processed_transcript	14.8078	14.461	13.6695	25.9473	16.9308	15.337	0.73758	-0.439128	0.0493934	down	no
ENSMUSG00000058454	Dhcr7	7-dehydrocholesterol reductase [Source:MGI Symbol;Acc:MGI:1298378]	protein_coding;retained_intron;processed_transcript;nonsense_mediated_decay	13.5519	13.5558	10.9539	23.509	14.1965	13.6593	0.741006	-0.432443	0.0498867	down	no
ENSMUSG00000029223	Uchl1	ubiquitin carboxy-terminal hydrolase L1 [Source:MGI Symbol;Acc:MGI:103149]	retained_intron;protein_coding	1.63493	1.56173	1.45127	3.4526	1.87119	2.06106	0.629386	-0.667983	0.0498964	down	no
ENSMUSG00000078249	Hmga1b	high mobility group AT-hook 1B [Source:MGI Symbol;Acc:MGI:96161]	protein_coding	17.7229	17.0609	15.094	31.9679	18.4111	18.2316	0.72697	-0.460032	0.0499458	down	no
Theophylline vs CK
gene_id	gene_name	Description	trans_type	FPKM.Theophylline1	FPKM.Theophylline2	FPKM.Theophylline3	FPKM.Control1	FPKM.Control2	FPKM.Control3	fc	log2(fc)	pval	regulation	significant
ENSMUSG00000025163	Cd7	CD7 antigen [Source:MGI Symbol;Acc:MGI:88344]	protein_coding;retained_intron	16.1918	16.5378	15.7232	2.62751	3.1382	2.97895	5.54084	2.47011	7.64664e-17	up	yes
ENSMUSG00000005615	Pcyt1a	phosphate cytidylyltransferase 1, choline, alpha isoform [Source:MGI Symbol;Acc:MGI:88557]	protein_coding;retained_intron	10.1613	11.1522	10.9222	2.84418	3.10267	3.16505	3.53776	1.82284	8.7772e-16	up	yes
ENSMUSG00000048424	Ranbp3l	RAN binding protein 3-like [Source:MGI Symbol;Acc:MGI:2444654]	protein_coding;retained_intron;processed_transcript	2.25947	1.86908	2.21629	0.238116	0.518264	0.451204	5.25416	2.39346	7.34892e-12	up	yes
ENSMUSG00000053012	Krcc1	lysine-rich coiled-coil 1 [Source:MGI Symbol;Acc:MGI:1889377]	protein_coding	32.1777	37.6732	36.6952	13.0072	9.3274	9.70846	3.32509	1.73339	6.697e-11	up	yes
ENSMUSG00000056270	Prr9	proline rich 9 [Source:MGI Symbol;Acc:MGI:1925680]	protein_coding	7.87246	10.0591	8.29311	1.5507	1.5526	2.28437	4.86754	2.28319	8.289e-11	up	yes
ENSMUSG00000038560	Sp6	trans-acting transcription factor 6 [Source:MGI Symbol;Acc:MGI:1932575]	protein_coding	1.37507	0.0001	0.848993	0.0001	0.0001	0.0001	7413.87	12.856	1.56758e-08	up	yes
ENSMUSG00000029675	Eln	elastin [Source:MGI Symbol;Acc:MGI:95317]	protein_coding;retained_intron;nonsense_mediated_decay	0.348746	0.270964	0.329387	0.02852	0.0772225	0.060494	5.70931	2.51332	1.05352e-07	up	yes
ENSMUSG00000037211	Spry1	sprouty RTK signaling antagonist 1 [Source:MGI Symbol;Acc:MGI:1345139]	protein_coding	11.3819	0.0036175	9.79682	0.0212375	0.00204778	0.03265	378.693	8.56489	1.12993e-07	up	yes
ENSMUSG00000092574	2810047C21Rik1	RIKEN cDNA 2810047C21 gene 1 [Source:MGI Symbol;Acc:MGI:1919966]	processed_transcript;transcribed_unprocessed_pseudogene	0.954377	3.01012	0.628368	0.0001	0.0001	0.0001	15309.6	13.9021	2.26629e-17	up	yes
ENSMUSG00000072676	Tmem254a	transmembrane protein 254a [Source:MGI Symbol;Acc:MGI:1196450]	protein_coding;retained_intron;nonsense_mediated_decay	0.601289	0.674023	0.0001	0.0001	0.0001	0.0001	4251.38	12.0537	1.3988e-07	up	yes
ENSMUSG00000054672	5830411N06Rik	RIKEN cDNA 5830411N06 gene [Source:MGI Symbol;Acc:MGI:2443685]	protein_coding;retained_intron	1.52429	1.43627	1.54919	0.328535	0.401804	0.537334	3.5575	1.83086	1.43314e-07	up	yes
ENSMUSG00000086782	E130102H24Rik	RIKEN cDNA E130102H24 gene [Source:MGI Symbol;Acc:MGI:1925116]	lincRNA	1.57309	1.75653	0.0001	0.0001	0.0001	0.0001	11099.1	13.4381	1.55796e-07	up	yes
ENSMUSG00000001240	Ramp2	receptor (calcitonin) activity modifying protein 2 [Source:MGI Symbol;Acc:MGI:1859650]	nonsense_mediated_decay;protein_coding;retained_intron	4.66637	4.11923	4.26214	0.833311	1.87837	1.07236	3.4481	1.7858	2.9099e-07	up	yes
ENSMUSG00000107023	Gm42715	predicted gene 42715 [Source:MGI Symbol;Acc:MGI:5662852]	nonsense_mediated_decay	5.72861	4.94627	3.72523	1.81288	2.08919	1.00675	2.93352	1.55263	1.00564e-06	up	yes
ENSMUSG00000031548	Sfrp1	secreted frizzled-related protein 1 [Source:MGI Symbol;Acc:MGI:892014]	protein_coding	5.41799	5.77475	5.61517	1.89114	2.61668	2.36944	2.44399	1.28924	1.32546e-06	up	yes
ENSMUSG00000104876	Trdc	T cell receptor delta, constant region [Source:MGI Symbol;Acc:MGI:98612]	TR_C_gene	1.39008	1.57941	1.65839	0.562888	0.309392	0.292216	3.97415	1.99065	2.82279e-06	up	yes
ENSMUSG00000005360	Slc1a3	solute carrier family 1 (glial high affinity glutamate transporter), member 3 [Source:MGI Symbol;Acc:MGI:99917]	protein_coding;processed_transcript;retained_intron	10.7016	10.3504	10.5094	1.90608	5.98837	3.10597	2.8691	1.5206	3.26513e-06	up	yes
ENSMUSG00000024087	Cyp1b1	cytochrome P450, family 1, subfamily b, polypeptide 1 [Source:MGI Symbol;Acc:MGI:88590]	protein_coding;nonsense_mediated_decay	38.4593	40.1995	40.1239	16.3284	22.6534	19.7667	2.02189	1.0157	6.11369e-06	up	yes
ENSMUSG00000023882	Zfp54	zinc finger protein 54 [Source:MGI Symbol;Acc:MGI:99201]	protein_coding	1.30008	1.29636	1.24951	0.26755	0.436865	0.400019	3.48228	1.80003	6.45287e-06	up	yes
ENSMUSG00000019990	Pde7b	phosphodiesterase 7B [Source:MGI Symbol;Acc:MGI:1352752]	protein_coding;retained_intron;nonsense_mediated_decay	0.161142	0.194573	0.174499	0.033892	0.0322077	0.0606124	4.1844	2.06502	7.52738e-06	up	yes
ENSMUSG00000021904	Sema3g	sema domain, immunoglobulin domain (Ig), short basic domain, secreted, (semaphorin) 3G [Source:MGI Symbol;Acc:MGI:3041242]	protein_coding	1.02479	0.990436	1.07699	0.203638	0.322823	0.405299	3.31868	1.73061	8.04108e-06	up	yes
ENSMUSG00000043635	Adamts3	a disintegrin-like and metallopeptidase (reprolysin type) with thrombospondin type 1 motif, 3 [Source:MGI Symbol;Acc:MGI:3045353]	protein_coding;processed_transcript	0.152742	0.203169	0.229092	0.0182146	0.0354149	0.0609575	5.10532	2.352	8.08647e-06	up	yes
ENSMUSG00000069421	Olfr810	olfactory receptor 810 [Source:MGI Symbol;Acc:MGI:3030644]	protein_coding	0.750232	1.46676	1.27844	0.198541	0.435017	0.325253	3.64558	1.86615	1.04188e-05	up	yes
ENSMUSG00000051855	Mest	mesoderm specific transcript [Source:MGI Symbol;Acc:MGI:96968]	protein_coding;retained_intron;processed_transcript	3.89013	5.02814	5.28274	0.766689	1.54606	2.38238	3.02463	1.59676	1.12469e-05	up	yes
ENSMUSG00000020738	Sumo2	small ubiquitin-like modifier 2 [Source:MGI Symbol;Acc:MGI:2158813]	protein_coding;retained_intron;nonsense_mediated_decay	6.04046	38.2151	48.8971	7.28483	5.30514	4.6989	5.38801	2.42975	1.17951e-05	up	yes
ENSMUSG00000067279	Ppp1r3c	protein phosphatase 1, regulatory subunit 3C [Source:MGI Symbol;Acc:MGI:1858229]	protein_coding	1.1084	1.01932	1.17613	0.298408	0.350834	0.33731	3.34888	1.74368	1.60585e-05	up	yes
ENSMUSG00000058838	Rps27a-ps2	ribosomal protein S27A, pseudogene 2 [Source:MGI Symbol;Acc:MGI:3643614]	processed_pseudogene	181.579	203.216	207.856	103.867	57.806	93.1367	2.32586	1.21777	1.91951e-05	up	yes
ENSMUSG00000020053	Igf1	insulin-like growth factor 1 [Source:MGI Symbol;Acc:MGI:96432]	protein_coding	19.2271	20.4002	22.3361	5.98222	11.9397	10.9994	2.14247	1.09928	2.14462e-05	up	yes
ENSMUSG00000022641	Bbx	bobby sox HMG box containing [Source:MGI Symbol;Acc:MGI:1917758]	protein_coding;retained_intron;processed_transcript	2.30304	2.40645	2.89213	0.95721	1.13982	1.4409	2.14861	1.1034	2.36781e-05	up	yes
ENSMUSG00000030882	Dnhd1	dynein heavy chain domain 1 [Source:MGI Symbol;Acc:MGI:1924755]	protein_coding;retained_intron	0.150858	0.158044	0.0875824	0.007569	0.0414491	0.0275803	5.17616	2.37188	2.69553e-05	up	yes
ENSMUSG00000020140	Lgr5	leucine rich repeat containing G protein coupled receptor 5 [Source:MGI Symbol;Acc:MGI:1341817]	protein_coding;retained_intron;processed_transcript	1.87554	2.03091	2.14541	0.371644	0.935847	0.976493	2.64969	1.40582	2.9584e-05	up	yes
ENSMUSG00000020427	Igfbp3	insulin-like growth factor binding protein 3 [Source:MGI Symbol;Acc:MGI:96438]	protein_coding	20.7738	20.9566	22.467	9.58209	12.7035	10.3457	1.96736	0.976258	3.23465e-05	up	no
ENSMUSG00000022425	Enpp2	ectonucleotide pyrophosphatase/phosphodiesterase 2 [Source:MGI Symbol;Acc:MGI:1321390]	protein_coding;retained_intron;processed_transcript	0.514188	0.469231	0.62533	0.100624	0.196878	0.176431	3.39447	1.76318	3.37307e-05	up	yes
ENSMUSG00000025735	Rhbdl1	rhomboid like 1 [Source:MGI Symbol;Acc:MGI:2384891]	protein_coding	1.06773	1.00511	0.206968	0.0855013	0.11871	0.158511	6.28527	2.65197	3.6305e-05	up	yes
ENSMUSG00000036160	Surf6	surfeit gene 6 [Source:MGI Symbol;Acc:MGI:98447]	processed_transcript;protein_coding	4.44126	4.82835	4.78447	1.82671	2.5172	1.91721	2.24466	1.1665	3.69433e-05	up	yes
ENSMUSG00000014813	Stc1	stanniocalcin 1 [Source:MGI Symbol;Acc:MGI:109131]	protein_coding	1.07763	0.971729	1.01389	0.219403	0.451036	0.273649	3.24467	1.69807	3.86368e-05	up	yes
ENSMUSG00000103047	Gm37310	predicted gene, 37310 [Source:MGI Symbol;Acc:MGI:5610538]	TEC	0.365659	0.401545	0.512169	0.044018	0.146657	0.112877	4.21467	2.07542	4.74024e-05	up	yes
ENSMUSG00000058291	Zfp68	zinc finger protein 68 [Source:MGI Symbol;Acc:MGI:1344427]	protein_coding;processed_transcript;retained_intron	5.02863	5.14393	5.13743	1.9137	2.35718	3.11096	2.07401	1.05242	5.07433e-05	up	yes
ENSMUSG00000003949	Hlf	hepatic leukemia factor [Source:MGI Symbol;Acc:MGI:96108]	protein_coding;processed_transcript	0.21291	0.192132	0.153931	0.0652263	0.0329163	0.0262086	4.49512	2.16836	5.09539e-05	up	yes
ENSMUSG00000020914	Top2a	topoisomerase (DNA) II alpha [Source:MGI Symbol;Acc:MGI:98790]	protein_coding;processed_transcript	14.2541	16.3683	17.9345	5.5791	9.05885	9.94322	1.97537	0.982124	7.75975e-05	up	no
ENSMUSG00000044338	Aplnr	apelin receptor [Source:MGI Symbol;Acc:MGI:1346086]	protein_coding	0.531564	0.601025	0.615576	0.17873	0.211577	0.10901	3.50111	1.80781	7.96255e-05	up	yes
ENSMUSG00000036819	Jmjd4	jumonji domain containing 4 [Source:MGI Symbol;Acc:MGI:2144404]	protein_coding;nonsense_mediated_decay;retained_intron	1.54104	2.08578	1.97543	0.536309	0.974025	0.789699	2.43573	1.28435	8.69721e-05	up	yes
ENSMUSG00000027217	Tspan18	tetraspanin 18 [Source:MGI Symbol;Acc:MGI:1917186]	protein_coding;processed_transcript	0.21553	0.122891	0.129717	0.0301603	0.0416258	0.0527333	3.75956	1.91056	8.73995e-05	up	yes
ENSMUSG00000075224	Lrrc55	leucine rich repeat containing 55 [Source:MGI Symbol;Acc:MGI:2685197]	protein_coding;nonsense_mediated_decay	0.245264	0.245186	0.329456	0.0529288	0.109624	0.0684518	3.5493	1.82754	0.000107226	up	yes
ENSMUSG00000028517	Plpp3	phospholipid phosphatase 3 [Source:MGI Symbol;Acc:MGI:1915166]	protein_coding	21.726	21.7767	20.6554	8.49193	12.4762	13.075	1.88461	0.914269	0.000121443	up	no
ENSMUSG00000026574	Dpt	dermatopontin [Source:MGI Symbol;Acc:MGI:1928392]	protein_coding	8.86749	8.64922	8.68084	3.12242	4.50303	4.40691	2.17726	1.12251	0.000132684	up	yes
ENSMUSG00000014773	Dll1	delta like canonical Notch ligand 1 [Source:MGI Symbol;Acc:MGI:104659]	protein_coding;retained_intron;processed_transcript	6.1994	5.8422	6.10882	2.08052	3.31342	3.39357	2.06548	1.04648	0.000138304	up	yes
ENSMUSG00000049957	Ccdc137	coiled-coil domain containing 137 [Source:MGI Symbol;Acc:MGI:1914541]	protein_coding;processed_transcript;retained_intron	7.63085	7.72787	7.10846	4.38108	2.38047	2.31948	2.47407	1.30689	0.000140346	up	yes
ENSMUSG00000037652	Phc3	polyhomeotic 3 [Source:MGI Symbol;Acc:MGI:2181434]	protein_coding;nonsense_mediated_decay;retained_intron	0.497368	2.32621	2.81007	0.368865	0.56202	0.662529	3.53558	1.82195	0.000142303	up	yes
ENSMUSG00000020330	Hmmr	hyaluronan mediated motility receptor (RHAMM) [Source:MGI Symbol;Acc:MGI:104667]	protein_coding;processed_transcript	4.92258	5.18862	5.07471	1.3487	2.35329	3.1584	2.21357	1.14637	0.000144091	up	yes
ENSMUSG00000058258	Idi1	isopentenyl-diphosphate delta isomerase [Source:MGI Symbol;Acc:MGI:2442264]	protein_coding;retained_intron	13.7206	14.3673	14.2508	7.42835	8.04438	6.27699	1.94663	0.960982	0.000147739	up	no
ENSMUSG00000028525	Pde4b	phosphodiesterase 4B, cAMP specific [Source:MGI Symbol;Acc:MGI:99557]	protein_coding;retained_intron;nonsense_mediated_decay	1.6404	1.88206	2.05861	0.868756	0.827855	0.97638	2.08795	1.06209	0.000161493	up	yes
ENSMUSG00000085584	Rtl9	retrotransposon Gag like 9 [Source:MGI Symbol;Acc:MGI:2685231]	protein_coding	0.351868	0.313589	0.491799	0.097595	0.107208	0.142793	3.32931	1.73522	0.000161727	up	yes
ENSMUSG00000007589	Tinf2	Terf1 (TRF1)-interacting nuclear factor 2 [Source:MGI Symbol;Acc:MGI:107246]	protein_coding;retained_intron	4.2238	4.35616	4.73539	1.92314	2.05952	2.53105	2.04421	1.03154	0.000164741	up	yes
ENSMUSG00000047881	Rell1	RELT-like 1 [Source:MGI Symbol;Acc:MGI:2140767]	protein_coding;nonsense_mediated_decay;processed_transcript;retained_intron	22.4998	22.1381	15.7533	12.1907	5.64719	6.23709	2.50846	1.3268	0.00016502	up	yes
ENSMUSG00000027559	Car3	carbonic anhydrase 3 [Source:MGI Symbol;Acc:MGI:88270]	protein_coding;retained_intron	8.9078	9.18458	10.0947	4.03343	5.69319	4.14122	2.03255	1.02329	0.000174267	up	yes
ENSMUSG00000052293	Taf9	TATA-box binding protein associated factor 9 [Source:MGI Symbol;Acc:MGI:1888697]	protein_coding	3.12097	3.25092	2.6883	0.979064	0.950816	1.54501	2.60733	1.38257	0.000174594	up	yes
ENSMUSG00000045382	Cxcr4	chemokine (C-X-C motif) receptor 4 [Source:MGI Symbol;Acc:MGI:109563]	protein_coding	26.8047	23.2065	25.0521	9.91629	15.0187	14.069	1.92451	0.944489	0.000177789	up	no
ENSMUSG00000098374	Gm28043	predicted gene, 28043 [Source:MGI Symbol;Acc:MGI:5547779]	nonsense_mediated_decay	3.12782	4.59125	4.01355	1.52054	1.84326	2.2629	2.08517	1.06016	0.000185621	up	yes
ENSMUSG00000025165	Sectm1a	secreted and transmembrane 1A [Source:MGI Symbol;Acc:MGI:2384805]	protein_coding;processed_transcript	2.64633	2.26199	3.59576	0.438927	1.32292	0.970221	3.11268	1.63816	0.000189391	up	yes
ENSMUSG00000040181	Fmo1	flavin containing monooxygenase 1 [Source:MGI Symbol;Acc:MGI:1310002]	protein_coding;retained_intron;processed_transcript	1.27846	1.13779	1.18181	0.452473	0.61313	0.363649	2.51744	1.33196	0.000219945	up	yes
ENSMUSG00000024056	Ndc80	NDC80 kinetochore complex component [Source:MGI Symbol;Acc:MGI:1914302]	protein_coding;retained_intron;processed_transcript;nonsense_mediated_decay	2.67668	3.10707	2.73108	0.902948	1.4019	1.69277	2.12998	1.09084	0.000243361	up	yes
ENSMUSG00000032254	Kif23	kinesin family member 23 [Source:MGI Symbol;Acc:MGI:1919069]	processed_transcript;protein_coding;retained_intron	4.30967	3.9406	3.98705	1.83295	2.33056	2.26526	1.90353	0.928675	0.000247	up	no
ENSMUSG00000020088	Sar1a	secretion associated Ras related GTPase 1A [Source:MGI Symbol;Acc:MGI:98230]	protein_coding;retained_intron;nonsense_mediated_decay	70.3224	74.9609	19.741	19.3756	20.5973	21.1001	2.70209	1.43407	0.000251537	up	yes
ENSMUSG00000022033	Pbk	PDZ binding kinase [Source:MGI Symbol;Acc:MGI:1289156]	protein_coding;processed_transcript	14.2365	14.7752	13.3225	5.63396	8.53477	7.15339	1.98546	0.989473	0.000252189	up	no
ENSMUSG00000042804	Gpr153	G protein-coupled receptor 153 [Source:MGI Symbol;Acc:MGI:1916157]	protein_coding;processed_transcript	16.0712	3.73143	14.2115	4.18488	3.45276	3.81463	2.97007	1.5705	0.000276994	up	yes
ENSMUSG00000021803	Cdhr1	cadherin-related family member 1 [Source:MGI Symbol;Acc:MGI:2157782]	protein_coding	16.5386	16.274	16.5932	8.23995	9.90245	9.71697	1.7734	0.826517	0.000278884	up	no
ENSMUSG00000044258	Ctla2a	cytotoxic T lymphocyte-associated protein 2 alpha [Source:MGI Symbol;Acc:MGI:88554]	retained_intron;processed_transcript;protein_coding;nonsense_mediated_decay	13.3351	14.6476	14.0697	5.49955	7.39138	8.77286	1.94114	0.956903	0.00030573	up	no
ENSMUSG00000024810	Il33	interleukin 33 [Source:MGI Symbol;Acc:MGI:1924375]	protein_coding	9.58653	12.07	10.8004	4.12676	6.25598	6.25063	1.95132	0.964448	0.000307277	up	no
ENSMUSG00000015880	Ncapg	non-SMC condensin I complex, subunit G [Source:MGI Symbol;Acc:MGI:1930197]	retained_intron;protein_coding	2.27413	2.66027	2.5697	0.743031	1.11873	1.5781	2.18151	1.12533	0.000309901	up	yes
ENSMUSG00000034459	Ifit1	interferon-induced protein with tetratricopeptide repeats 1 [Source:MGI Symbol;Acc:MGI:99450]	protein_coding	0.547371	0.7351	1.31218	0.14486	0.360936	0.064204	4.55202	2.18651	0.000309976	up	yes
ENSMUSG00000026276	Sept2	septin 2 [Source:MGI Symbol;Acc:MGI:97298]	protein_coding;retained_intron	1.02652	3.43439	4.63848	0.640489	1.18737	1.15853	3.04695	1.60737	0.000341864	up	yes
ENSMUSG00000025475	Adgra1	adhesion G protein-coupled receptor A1 [Source:MGI Symbol;Acc:MGI:1277167]	protein_coding;processed_transcript;retained_intron	0.327491	0.269304	0.198341	0.045648	0.0692048	0.119693	3.39011	1.76133	0.000352583	up	yes
ENSMUSG00000049421	Zfp260	zinc finger protein 260 [Source:MGI Symbol;Acc:MGI:1347071]	protein_coding;retained_intron;processed_transcript	2.75542	3.48698	0.447078	0.478258	0.51928	0.658608	4.03918	2.01406	0.000364113	up	yes
ENSMUSG00000023886	Smoc2	SPARC related modular calcium binding 2 [Source:MGI Symbol;Acc:MGI:1929881]	protein_coding;processed_transcript;retained_intron	8.50695	8.53838	8.31627	4.09512	5.00844	5.17714	1.77594	0.82858	0.000373328	up	no
ENSMUSG00000057363	Uxs1	UDP-glucuronate decarboxylase 1 [Source:MGI Symbol;Acc:MGI:1915133]	protein_coding;nonsense_mediated_decay;processed_transcript	17.5297	12.2422	19.5152	7.22632	9.62568	9.4127	1.87656	0.908087	0.00037946	up	no
ENSMUSG00000030074	Gxylt2	glucoside xylosyltransferase 2 [Source:MGI Symbol;Acc:MGI:2682940]	protein_coding;processed_transcript	4.99932	4.63976	4.87812	2.21102	3.0508	2.56698	1.85433	0.890901	0.000403504	up	no
ENSMUSG00000021699	Pde4d	phosphodiesterase 4D, cAMP specific [Source:MGI Symbol;Acc:MGI:99555]	protein_coding;processed_transcript;retained_intron;nonsense_mediated_decay	3.9218	3.94084	4.29862	1.58575	2.59755	2.34647	1.86243	0.897188	0.000414388	up	no
ENSMUSG00000030162	Olr1	oxidized low density lipoprotein (lectin-like) receptor 1 [Source:MGI Symbol;Acc:MGI:1261434]	protein_coding	1.44035	1.42269	1.23014	0.183562	0.609368	0.587718	2.96468	1.56788	0.000420964	up	yes
ENSMUSG00000036768	Kif15	kinesin family member 15 [Source:MGI Symbol;Acc:MGI:1098258]	protein_coding;retained_intron;nonsense_mediated_decay;processed_transcript	1.23581	1.30022	1.50368	0.262091	0.576613	0.808929	2.45183	1.29386	0.000448338	up	yes
ENSMUSG00000025089	Gfra1	glial cell line derived neurotrophic factor family receptor alpha 1 [Source:MGI Symbol;Acc:MGI:1100842]	protein_coding;nonsense_mediated_decay	9.57488	9.67654	9.95456	5.40411	5.47897	2.69238	2.15138	1.10526	0.000470163	up	yes
ENSMUSG00000021390	Ogn	osteoglycin [Source:MGI Symbol;Acc:MGI:109278]	protein_coding	170.98	194.457	197.14	34.9193	106.064	112.021	2.22358	1.15289	0.000529287	up	yes
ENSMUSG00000012443	Kif11	kinesin family member 11 [Source:MGI Symbol;Acc:MGI:1098231]	protein_coding;retained_intron	3.88904	4.43669	4.80143	1.11621	2.31725	2.80211	2.1052	1.07396	0.000530677	up	yes
ENSMUSG00000052957	Gas1	growth arrest specific 1 [Source:MGI Symbol;Acc:MGI:95655]	protein_coding	55.9398	51.8968	50.9855	32.6499	30.2835	23.7729	1.83173	0.873203	0.000559514	up	no
ENSMUSG00000039985	Sinhcaf	SIN3-HDAC complex associated factor [Source:MGI Symbol;Acc:MGI:1929091]	protein_coding;nonsense_mediated_decay;retained_intron;processed_transcript	3.88692	4.59482	3.94014	1.30411	0.998049	2.78454	2.44203	1.28808	0.00056539	up	yes
ENSMUSG00000041771	Slc24a4	solute carrier family 24 (sodium/potassium/calcium exchanger), member 4 [Source:MGI Symbol;Acc:MGI:2447362]	protein_coding	1.24707	0.831013	1.11842	0.234224	0.611371	0.298916	2.7929	1.48176	0.000595668	up	yes
ENSMUSG00000027306	Nusap1	nucleolar and spindle associated protein 1 [Source:MGI Symbol;Acc:MGI:2675669]	protein_coding;processed_transcript	7.03728	7.53553	7.5179	2.57737	3.985	4.87726	1.93107	0.949398	0.000604133	up	no
ENSMUSG00000037379	Spon2	spondin 2, extracellular matrix protein [Source:MGI Symbol;Acc:MGI:1923724]	protein_coding;retained_intron	35.8852	32.68	34.8742	18.8868	21.5133	19.7078	1.72089	0.783158	0.000619432	up	no
ENSMUSG00000020265	Sumo3	small ubiquitin-like modifier 3 [Source:MGI Symbol;Acc:MGI:1336201]	protein_coding;nonsense_mediated_decay;processed_transcript	11.957	24.7939	31.3908	10.7056	9.8742	10.7261	2.17665	1.12211	0.000619616	up	yes
ENSMUSG00000049538	Adamts16	a disintegrin-like and metallopeptidase (reprolysin type) with thrombospondin type 1 motif, 16 [Source:MGI Symbol;Acc:MGI:2429637]	protein_coding;nonsense_mediated_decay;retained_intron	40.6335	40.565	44.7604	21.06	26.4533	26.1398	1.71016	0.774132	0.000620011	up	no
ENSMUSG00000028197	Col24a1	collagen, type XXIV, alpha 1 [Source:MGI Symbol;Acc:MGI:1918605]	protein_coding;retained_intron;processed_transcript	0.134783	0.0994084	0.129864	0.0194669	0.0558814	0.0344712	3.31503	1.72902	0.000634541	up	yes
ENSMUSG00000026683	Nuf2	NUF2, NDC80 kinetochore complex component [Source:MGI Symbol;Acc:MGI:1914227]	protein_coding;retained_intron	3.94573	4.7165	4.42078	1.82812	2.64967	2.50842	1.87269	0.905112	0.000648522	up	no
ENSMUSG00000074896	Ifit3	interferon-induced protein with tetratricopeptide repeats 3 [Source:MGI Symbol;Acc:MGI:1101055]	protein_coding	1.63335	1.86038	2.82909	0.737248	0.79179	0.847044	2.66103	1.41199	0.000652753	up	yes
ENSMUSG00000002055	Spag5	sperm associated antigen 5 [Source:MGI Symbol;Acc:MGI:1927470]	retained_intron;protein_coding;processed_transcript	5.41384	5.91053	5.97365	2.12481	3.24952	3.77513	1.8906	0.918848	0.000668943	up	no
ENSMUSG00000023940	Sgo1	shugoshin 1 [Source:MGI Symbol;Acc:MGI:1919665]	protein_coding;processed_transcript	2.7488	3.9752	3.45603	1.1533	1.88595	1.70225	2.14701	1.10233	0.000681536	up	yes
ENSMUSG00000029371	Cxcl5	chemokine (C-X-C motif) ligand 5 [Source:MGI Symbol;Acc:MGI:1096868]	protein_coding;retained_intron	2.11734	1.43337	1.50849	0.40399	0.713013	0.753692	2.70445	1.43534	0.000685816	up	yes
ENSMUSG00000033952	Aspm	abnormal spindle microtubule assembly [Source:MGI Symbol;Acc:MGI:1334448]	protein_coding;retained_intron;processed_transcript	1.35767	1.5476	1.5475	0.414021	0.845696	0.867284	2.09345	1.06588	0.000736213	up	yes
ENSMUSG00000022114	Spry2	sprouty RTK signaling antagonist 2 [Source:MGI Symbol;Acc:MGI:1345138]	protein_coding	41.3296	36.9166	37.0521	19.1522	24.9252	22.9474	1.72023	0.782604	0.000738654	up	no
ENSMUSG00000093847	Gm5039	predicted gene 5039 [Source:MGI Symbol;Acc:MGI:3648085]	protein_coding	1.3194	1.68775	1.45492	0.180498	0.782496	0.437614	3.18581	1.67166	0.000746963	up	yes
ENSMUSG00000036446	Lum	lumican [Source:MGI Symbol;Acc:MGI:109347]	protein_coding	1.80233	2.20669	1.84431	0.267487	0.852104	0.93156	2.85368	1.51282	0.000749089	up	yes
ENSMUSG00000069622	Gm10273	predicted pseudogene 10273 [Source:MGI Symbol;Acc:MGI:3704362]	protein_coding	1.40537	0.703087	10.5199	0.65032	0.542549	0.775807	6.41465	2.68137	0.000762424	up	yes
ENSMUSG00000039396	Neil3	nei like 3 (E. coli) [Source:MGI Symbol;Acc:MGI:2384588]	protein_coding;processed_transcript;retained_intron	2.30995	2.28856	2.00044	0.628279	1.03777	1.35027	2.18775	1.12945	0.000774585	up	yes
ENSMUSG00000027469	Tpx2	TPX2, microtubule-associated [Source:MGI Symbol;Acc:MGI:1919369]	protein_coding;retained_intron;processed_transcript	12.3817	13.363	13.4831	6.83676	7.56876	8.3073	1.72712	0.788372	0.000781412	up	no
ENSMUSG00000053080	2700081O15Rik	RIKEN cDNA 2700081O15 gene [Source:MGI Symbol;Acc:MGI:1919667]	retained_intron;protein_coding;nonsense_mediated_decay	6.00166	5.75967	2.0345	1.81967	2.0005	2.02837	2.35885	1.23809	0.000807361	up	yes
ENSMUSG00000033192	Lpcat2	lysophosphatidylcholine acyltransferase 2 [Source:MGI Symbol;Acc:MGI:3606214]	processed_transcript;nonsense_mediated_decay;protein_coding;retained_intron	4.30375	3.09186	3.4615	0.664706	1.85719	1.91231	2.44849	1.29189	0.000807439	up	yes
ENSMUSG00000022018	Rgcc	regulator of cell cycle [Source:MGI Symbol;Acc:MGI:1913464]	protein_coding	18.0846	17.6174	12.6963	7.31351	8.99486	7.45916	2.03632	1.02597	0.000839726	up	yes
ENSMUSG00000028175	Depdc1a	DEP domain containing 1a [Source:MGI Symbol;Acc:MGI:1923381]	protein_coding	2.99542	3.87631	4.53581	0.900697	1.68393	2.30929	2.33097	1.22093	0.000850082	up	yes
ENSMUSG00000021614	Vcan	versican [Source:MGI Symbol;Acc:MGI:102889]	protein_coding;retained_intron	38.4852	42.7375	49.1818	12.2766	25.1383	29.709	1.94274	0.958096	0.000875713	up	no
ENSMUSG00000022034	Esco2	establishment of sister chromatid cohesion N-acetyltransferase 2 [Source:MGI Symbol;Acc:MGI:1919238]	protein_coding;retained_intron	1.16394	1.6847	1.66805	0.247876	0.668042	0.827365	2.59091	1.37346	0.000894534	up	yes
ENSMUSG00000022479	Vdr	vitamin D (1,25-dihydroxyvitamin D3) receptor [Source:MGI Symbol;Acc:MGI:103076]	protein_coding;retained_intron	22.7289	21.1569	22.8205	12.3765	13.4839	13.7678	1.68331	0.751299	0.000894763	up	no
ENSMUSG00000022206	Npr3	natriuretic peptide receptor 3 [Source:MGI Symbol;Acc:MGI:97373]	protein_coding;processed_transcript	0.260073	0.228876	0.194523	0.0587784	0.091298	0.103082	2.69978	1.43284	0.000899335	up	yes
ENSMUSG00000005470	Asf1b	anti-silencing function 1B histone chaperone [Source:MGI Symbol;Acc:MGI:1914179]	protein_coding;processed_transcript;retained_intron	18.7789	19.2665	16.1832	10.7772	8.72332	9.87987	1.84574	0.884197	0.000925711	up	no
ENSMUSG00000042489	Clspn	claspin [Source:MGI Symbol;Acc:MGI:2445153]	protein_coding;processed_transcript	2.00499	2.42068	2.48472	0.782197	1.37092	1.3234	1.98774	0.991127	0.00108055	up	no
ENSMUSG00000027562	Car2	carbonic anhydrase 2 [Source:MGI Symbol;Acc:MGI:88269]	protein_coding;retained_intron	3.28447	3.4019	3.7626	1.476	1.64222	1.79357	2.12732	1.08904	0.00109685	up	yes
ENSMUSG00000037544	Dlgap5	DLG associated protein 5 [Source:MGI Symbol;Acc:MGI:2183453]	protein_coding;retained_intron;nonsense_mediated_decay;processed_transcript	2.63261	2.97649	3.12196	1.24083	1.54918	1.84705	1.88289	0.912949	0.00111494	up	no
ENSMUSG00000103436	Gm36995	predicted gene, 36995 [Source:MGI Symbol;Acc:MGI:5610223]	retained_intron	0.385489	0.596344	0.640792	0.120557	0.194125	0.279968	2.72871	1.44822	0.00112534	up	yes
ENSMUSG00000051235	Gen1	GEN1, Holliday junction 5' flap endonuclease [Source:MGI Symbol;Acc:MGI:2443149]	protein_coding;retained_intron;nonsense_mediated_decay;processed_transcript	0.75142	1.01287	1.07979	0.384285	0.427467	0.481037	2.19996	1.13747	0.00112702	up	yes
ENSMUSG00000020897	Aurkb	aurora kinase B [Source:MGI Symbol;Acc:MGI:107168]	protein_coding;retained_intron;processed_transcript	7.31674	6.9042	6.51265	3.91681	3.66933	3.40557	1.88629	0.915554	0.00125026	up	no
ENSMUSG00000041219	Arhgap11a	Rho GTPase activating protein 11A [Source:MGI Symbol;Acc:MGI:2444300]	protein_coding	5.35048	5.35267	6.29903	1.93987	3.27161	3.82186	1.88216	0.912388	0.0012667	up	no
ENSMUSG00000026605	Cenpf	centromere protein F [Source:MGI Symbol;Acc:MGI:1313302]	protein_coding;retained_intron;nonsense_mediated_decay	1.88854	1.85301	2.31476	0.379669	1.01918	1.3237	2.22451	1.15349	0.00127234	up	yes
ENSMUSG00000074165	Zfp788	zinc finger protein 788 [Source:MGI Symbol;Acc:MGI:1914857]	protein_coding	1.43624	1.77151	1.79364	0.487029	1.05097	0.589757	2.35055	1.233	0.00132153	up	yes
ENSMUSG00000030029	Lrig1	leucine-rich repeats and immunoglobulin-like domains 1 [Source:MGI Symbol;Acc:MGI:107935]	nonsense_mediated_decay;protein_coding;processed_transcript	12.8571	12.3469	12.2546	7.21976	5.12794	8.43569	1.80233	0.849865	0.00132461	up	no
ENSMUSG00000003779	Kif20a	kinesin family member 20A [Source:MGI Symbol;Acc:MGI:1201682]	protein_coding;nonsense_mediated_decay;retained_intron	13.6072	15.6757	15.6018	7.56637	9.05592	9.9763	1.68749	0.754877	0.00138282	up	no
ENSMUSG00000029309	Sparcl1	SPARC-like 1 [Source:MGI Symbol;Acc:MGI:108110]	protein_coding	0.462883	0.308237	0.483586	0.0324814	0.116451	0.207957	3.51567	1.8138	0.00138731	up	yes
ENSMUSG00000027379	Bub1	BUB1, mitotic checkpoint serine/threonine kinase [Source:MGI Symbol;Acc:MGI:1100510]	protein_coding;retained_intron;processed_transcript	3.91899	4.75281	4.59946	1.01158	2.35487	2.82945	2.14194	1.09892	0.00138848	up	yes
ENSMUSG00000041431	Ccnb1	cyclin B1 [Source:MGI Symbol;Acc:MGI:88302]	retained_intron;protein_coding	9.06239	9.93834	8.33745	3.79804	6.44538	4.84904	1.81138	0.857089	0.00141437	up	no
ENSMUSG00000022032	Scara5	scavenger receptor class A, member 5 [Source:MGI Symbol;Acc:MGI:1918395]	protein_coding;processed_transcript	4.46241	4.19787	4.21013	1.89777	2.98478	2.08981	1.84592	0.884339	0.00145786	up	no
ENSMUSG00000034906	Ncaph	non-SMC condensin I complex, subunit H [Source:MGI Symbol;Acc:MGI:2444777]	retained_intron;protein_coding;processed_transcript;nonsense_mediated_decay	6.62591	7.50381	7.28348	3.1916	4.3785	4.49144	1.77533	0.828086	0.00147314	up	no
ENSMUSG00000033355	Rtp4	receptor transporter protein 4 [Source:MGI Symbol;Acc:MGI:1915025]	protein_coding	0.905555	1.47163	0.735953	0.115973	0.380602	0.4688	3.22479	1.68921	0.00149519	up	yes
ENSMUSG00000029307	Dmp1	dentin matrix protein 1 [Source:MGI Symbol;Acc:MGI:94910]	protein_coding	1.22272	1.18028	1.15703	0.119912	0.47562	0.582726	3.02144	1.59523	0.00149798	up	yes
ENSMUSG00000078771	Evi2a	ecotropic viral integration site 2a [Source:MGI Symbol;Acc:MGI:95458]	protein_coding;processed_transcript	12.7804	12.4514	4.33574	2.18301	4.84048	4.94018	2.47144	1.30535	0.00150768	up	yes
ENSMUSG00000026196	Bard1	BRCA1 associated RING domain 1 [Source:MGI Symbol;Acc:MGI:1328361]	protein_coding	1.1048	1.11046	1.23981	0.47809	0.633537	0.490476	2.15659	1.10875	0.00151005	up	yes
ENSMUSG00000051022	Hs3st1	heparan sulfate (glucosamine) 3-O-sulfotransferase 1 [Source:MGI Symbol;Acc:MGI:1201606]	protein_coding	3.22233	2.55709	2.55156	1.08552	1.4062	1.36357	2.16092	1.11165	0.00160246	up	yes
ENSMUSG00000033813	Tcea1	transcription elongation factor A (SII) 1 [Source:MGI Symbol;Acc:MGI:1196624]	protein_coding	23.0334	25.8297	26.4838	16.7683	13.6135	8.99237	1.91361	0.936299	0.00173069	up	no
ENSMUSG00000004609	Cd33	CD33 antigen [Source:MGI Symbol;Acc:MGI:99440]	protein_coding;retained_intron;processed_transcript	0.153045	0.150166	0.111292	0.0286142	0.0726264	0.0369832	2.99878	1.58437	0.00179872	up	yes
ENSMUSG00000011171	Vipr2	vasoactive intestinal peptide receptor 2 [Source:MGI Symbol;Acc:MGI:107166]	protein_coding;processed_transcript;retained_intron	0.216633	0.141452	0.226237	0.0443224	0.0853088	0.0717108	2.90213	1.53711	0.00181031	up	yes
ENSMUSG00000037610	Kcnmb2	potassium large conductance calcium-activated channel, subfamily M, beta member 2 [Source:MGI Symbol;Acc:MGI:1919663]	protein_coding	2.32381	2.1742	2.3644	0.68329	1.24729	1.24871	2.15847	1.11001	0.00186426	up	yes
ENSMUSG00000027715	Ccna2	cyclin A2 [Source:MGI Symbol;Acc:MGI:108069]	protein_coding;retained_intron;processed_transcript;nonsense_mediated_decay	16.7927	18.6335	16.3374	8.5069	11.4757	11.2149	1.65922	0.730508	0.0018945	up	no
ENSMUSG00000066878	Gm10184	predicted pseudogene 10184 [Source:MGI Symbol;Acc:MGI:3704480]	protein_coding	8.30757	13.8856	7.4282	2.88255	5.34393	5.92812	2.0927	1.06537	0.00190181	up	yes
ENSMUSG00000057895	Zfp105	zinc finger protein 105 [Source:MGI Symbol;Acc:MGI:1277119]	protein_coding	0.595982	0.614282	0.695645	0.0436349	0.226884	0.307347	3.29819	1.72167	0.00190507	up	yes
ENSMUSG00000052013	Btla	B and T lymphocyte associated [Source:MGI Symbol;Acc:MGI:2658978]	protein_coding;processed_transcript	0.792662	0.653034	0.445311	0.203094	0.274509	0.249506	2.60072	1.37891	0.00192903	up	yes
ENSMUSG00000027398	Il1b	interleukin 1 beta [Source:MGI Symbol;Acc:MGI:96543]	protein_coding;processed_transcript;retained_intron	1.12333	1.25813	1.344	0.404615	0.540496	0.583414	2.43729	1.28528	0.00196741	up	yes
ENSMUSG00000019929	Dcn	decorin [Source:MGI Symbol;Acc:MGI:94872]	protein_coding;retained_intron	42.0362	43.035	41.7448	15.9788	27.9786	29.8059	1.71923	0.781761	0.00196861	up	no
ENSMUSG00000040289	Hey1	hairy/enhancer-of-split related with YRPW motif 1 [Source:MGI Symbol;Acc:MGI:1341800]	protein_coding;retained_intron	1.50405	1.9952	2.16881	0.84202	0.936849	0.818227	2.18246	1.12596	0.0020307	up	yes
ENSMUSG00000017615	Tnfaip1	tumor necrosis factor, alpha-induced protein 1 (endothelial) [Source:MGI Symbol;Acc:MGI:104961]	protein_coding	34.1314	36.8265	10.1238	13.084	10.0198	11.4561	2.34612	1.23028	0.00212347	up	yes
ENSMUSG00000030016	Zfp638	zinc finger protein 638 [Source:MGI Symbol;Acc:MGI:1203484]	protein_coding;retained_intron;processed_transcript;nonsense_mediated_decay	2.18825	2.93389	2.98993	0.555461	1.36174	1.91502	2.11681	1.08189	0.00225585	up	yes
ENSMUSG00000107134	Gm42528	predicted gene 42528 [Source:MGI Symbol;Acc:MGI:5662665]	TEC	0.513882	0.394991	0.357033	0.143349	0.203015	0.119858	2.71524	1.44108	0.00227721	up	yes
ENSMUSG00000027285	Haus2	HAUS augmin-like complex, subunit 2 [Source:MGI Symbol;Acc:MGI:1913546]	protein_coding;nonsense_mediated_decay	6.26448	5.93414	6.33965	3.19554	3.79516	3.39129	1.78562	0.836422	0.00228877	up	no
ENSMUSG00000073375	Lrrc30	leucine rich repeat containing 30 [Source:MGI Symbol;Acc:MGI:2685172]	protein_coding	0.55992	0.508632	0.444256	0.190409	0.175803	0.180899	2.76508	1.46732	0.00244416	up	yes
ENSMUSG00000076431	Sox4	SRY (sex determining region Y)-box 4 [Source:MGI Symbol;Acc:MGI:98366]	protein_coding	26.2462	26.5175	25.6479	12.4962	19.1713	16.272	1.63563	0.70985	0.00244966	up	no
ENSMUSG00000034311	Kif4	kinesin family member 4 [Source:MGI Symbol;Acc:MGI:108389]	protein_coding;retained_intron;processed_transcript	3.42394	3.77533	4.12915	1.77158	2.19221	2.39081	1.78271	0.834072	0.00245337	up	no
ENSMUSG00000037725	Ckap2	cytoskeleton associated protein 2 [Source:MGI Symbol;Acc:MGI:1931797]	protein_coding;retained_intron	7.88624	9.4257	7.67805	2.76758	5.02317	5.71249	1.85067	0.888045	0.00258252	up	no
ENSMUSG00000021965	Ska3	spindle and kinetochore associated complex subunit 3 [Source:MGI Symbol;Acc:MGI:3041235]	protein_coding;processed_transcript;retained_intron	3.28891	3.19933	3.49394	1.51487	1.7555	1.79454	1.97085	0.97882	0.00274062	up	no
ENSMUSG00000074867	Zfp808	zinc finger protein 808 [Source:MGI Symbol;Acc:MGI:3704127]	protein_coding;processed_transcript	0.52047	0.313104	0.24488	0.0338149	0.117211	0.183156	3.22714	1.69026	0.00291225	up	yes
ENSMUSG00000033306	Lpp	LIM domain containing preferred translocation partner in lipoma [Source:MGI Symbol;Acc:MGI:2441849]	protein_coding;retained_intron;nonsense_mediated_decay	3.96578	3.41587	3.85944	2.48338	1.60078	0.646538	2.3762	1.24866	0.00294977	up	yes
ENSMUSG00000039218	Srrm2	serine/arginine repetitive matrix 2 [Source:MGI Symbol;Acc:MGI:1923206]	processed_transcript;protein_coding;retained_intron;nonsense_mediated_decay	17.9464	13.6238	15.8311	8.34401	9.82354	10.9428	1.62833	0.703394	0.00295867	up	no
ENSMUSG00000045273	Cenph	centromere protein H [Source:MGI Symbol;Acc:MGI:1349448]	protein_coding;retained_intron	4.3009	5.24474	4.19953	1.35307	2.49991	2.67926	2.1042	1.07327	0.00295923	up	yes
ENSMUSG00000096856	Gm10778	predicted gene 10778 [Source:MGI Symbol;Acc:MGI:3809656]	protein_coding	0.699196	0.591797	0.679566	0.307674	0.207415	0.312364	2.38148	1.25186	0.00297151	up	yes
ENSMUSG00000038305	Spats2l	spermatogenesis associated, serine-rich 2-like [Source:MGI Symbol;Acc:MGI:1914448]	protein_coding;retained_intron	1.20211	0.934144	1.17794	0.322311	0.629573	0.634691	2.0889	1.06274	0.0029924	up	yes
ENSMUSG00000029838	Ptn	pleiotrophin [Source:MGI Symbol;Acc:MGI:97804]	protein_coding	1.85518	2.09161	1.97205	0.405231	1.33203	0.78246	2.34901	1.23205	0.00306848	up	yes
ENSMUSG00000046897	Zfp740	zinc finger protein 740 [Source:MGI Symbol;Acc:MGI:1915994]	retained_intron;protein_coding;processed_transcript	12.1438	3.05023	5.41214	2.79223	3.24862	2.7506	2.34389	1.2289	0.00307569	up	yes
ENSMUSG00000019230	Lhx9	LIM homeobox protein 9 [Source:MGI Symbol;Acc:MGI:1316721]	protein_coding;retained_intron;nonsense_mediated_decay	0.586208	0.668223	0.524528	0.183278	0.354002	0.2882	2.15506	1.10773	0.00308072	up	yes
ENSMUSG00000029380	Cxcl1	chemokine (C-X-C motif) ligand 1 [Source:MGI Symbol;Acc:MGI:108068]	protein_coding;retained_intron	1.52901	2.35368	1.58066	0.169798	0.752465	0.918367	2.96819	1.56959	0.00308491	up	yes
ENSMUSG00000068735	Trp53i11	transformation related protein 53 inducible protein 11 [Source:MGI Symbol;Acc:MGI:2670995]	protein_coding;processed_transcript	0.461402	0.275977	0.330018	0.13854	0.0832993	0.157834	2.81135	1.49126	0.00310648	up	yes
ENSMUSG00000032218	Ccnb2	cyclin B2 [Source:MGI Symbol;Acc:MGI:88311]	protein_coding	21.9834	22.4209	20.3143	11.7204	13.796	12.9547	1.68226	0.750403	0.00312679	up	no
ENSMUSG00000024795	Kif20b	kinesin family member 20B [Source:MGI Symbol;Acc:MGI:2444576]	protein_coding;retained_intron;nonsense_mediated_decay	1.71897	1.99277	2.44909	0.273665	0.895206	1.34725	2.44854	1.29192	0.00329881	up	yes
ENSMUSG00000045328	Cenpe	centromere protein E [Source:MGI Symbol;Acc:MGI:1098230]	protein_coding;retained_intron	2.47128	2.42081	3.06434	0.401555	1.36177	1.75665	2.26037	1.17656	0.00335129	up	yes
ENSMUSG00000038943	Prc1	protein regulator of cytokinesis 1 [Source:MGI Symbol;Acc:MGI:1858961]	protein_coding;retained_intron	5.2974	5.99983	5.70849	2.43176	3.73227	3.92877	1.68494	0.752694	0.00348104	up	no
ENSMUSG00000052125	F730043M19Rik	RIKEN cDNA F730043M19 gene [Source:MGI Symbol;Acc:MGI:2443237]	bidirectional_promoter_lncRNA	4.01158	3.48933	3.94163	1.27033	2.25488	2.60712	1.86594	0.899903	0.00349885	up	no
ENSMUSG00000005233	Spc25	SPC25, NDC80 kinetochore complex component, homolog (S. cerevisiae) [Source:MGI Symbol;Acc:MGI:1913692]	protein_coding;processed_transcript	6.07999	6.08611	6.80184	2.6675	4.24582	3.81537	1.76797	0.82209	0.00366162	up	no
ENSMUSG00000028036	Ptgfr	prostaglandin F receptor [Source:MGI Symbol;Acc:MGI:97796]	protein_coding;processed_transcript	0.948667	1.24865	1.22712	0.331906	0.66629	0.638261	2.09259	1.06529	0.00369161	up	yes
ENSMUSG00000115354	Gm49083	predicted gene, 49083 [Source:MGI Symbol;Acc:MGI:6118469]	lincRNA	0.805751	1.07635	1.64054	0.254871	0.687791	0.390173	2.64298	1.40216	0.00372993	up	yes
ENSMUSG00000050410	Tcf19	transcription factor 19 [Source:MGI Symbol;Acc:MGI:103180]	protein_coding	11.4613	11.5269	11.8582	6.40749	6.91744	6.78083	1.73316	0.793401	0.00374715	up	no
ENSMUSG00000096544	Gm4617	predicted pseudogene 4617 [Source:MGI Symbol;Acc:MGI:3704225]	processed_pseudogene	55.7326	58.2059	62.949	26.1387	33.7096	40.5883	1.76119	0.816548	0.00378059	up	no
ENSMUSG00000062115	Rai1	retinoic acid induced 1 [Source:MGI Symbol;Acc:MGI:103291]	protein_coding;processed_transcript	4.74583	1.65985	4.27489	1.51028	1.98377	1.68497	2.06227	1.04424	0.00383072	up	yes
ENSMUSG00000070960	Gm19680	predicted gene, 19680 [Source:MGI Symbol;Acc:MGI:5011865]	processed_pseudogene	1.28746	2.19438	2.74174	0.962008	0.816768	0.713075	2.49757	1.32053	0.00385892	up	yes
ENSMUSG00000031004	Mki67	antigen identified by monoclonal antibody Ki 67 [Source:MGI Symbol;Acc:MGI:106035]	protein_coding	6.91965	7.28724	8.77248	1.89102	4.36952	5.82403	1.90155	0.927173	0.0039044	up	no
ENSMUSG00000028678	Kif2c	kinesin family member 2C [Source:MGI Symbol;Acc:MGI:1921054]	protein_coding;retained_intron;processed_transcript	5.2826	5.06012	5.55702	2.6386	2.82703	3.70141	1.73445	0.794477	0.00402283	up	no
ENSMUSG00000074794	Arrdc3	arrestin domain containing 3 [Source:MGI Symbol;Acc:MGI:2145242]	protein_coding;nonsense_mediated_decay;retained_intron	6.31201	7.49638	7.31683	3.50168	2.88695	5.4663	1.78198	0.833479	0.00402567	up	no
ENSMUSG00000079553	Kifc1	kinesin family member C1 [Source:MGI Symbol;Acc:MGI:109596]	protein_coding;retained_intron	5.62064	4.98194	4.95805	2.96596	2.62794	3.14027	1.78158	0.83316	0.00405634	up	no
ENSMUSG00000060509	Xcr1	chemokine (C motif) receptor 1 [Source:MGI Symbol;Acc:MGI:1346338]	protein_coding	0.769295	0.762919	0.628689	0.277557	0.392401	0.30118	2.22512	1.15389	0.00409404	up	yes
ENSMUSG00000079144	A130010J15Rik	RIKEN cDNA A130010J15 gene [Source:MGI Symbol;Acc:MGI:2441776]	protein_coding	2.3743	2.35109	2.81203	1.38488	1.40684	1.10674	1.93343	0.951165	0.00418161	up	no
ENSMUSG00000032400	Zwilch	zwilch kinetochore protein [Source:MGI Symbol;Acc:MGI:1915264]	protein_coding;retained_intron;nonsense_mediated_decay	4.07524	3.73125	4.36416	1.56737	2.29524	2.85911	1.81064	0.856503	0.00420756	up	no
ENSMUSG00000027208	Fgf7	fibroblast growth factor 7 [Source:MGI Symbol;Acc:MGI:95521]	protein_coding;processed_transcript	2.50416	3.74451	3.05013	0.609104	1.95573	1.59457	2.2356	1.16067	0.00420955	up	yes
ENSMUSG00000037514	Pank2	pantothenate kinase 2 [Source:MGI Symbol;Acc:MGI:1921700]	protein_coding;nonsense_mediated_decay;processed_transcript	7.86148	8.61089	6.97406	5.4982	3.94051	3.12334	1.86645	0.900297	0.00429997	up	no
ENSMUSG00000039883	Lrrc17	leucine rich repeat containing 17 [Source:MGI Symbol;Acc:MGI:1921761]	protein_coding;processed_transcript	39.893	38.1212	40.2677	23.9749	26.7128	24.2478	1.57845	0.658508	0.00430726	up	no
ENSMUSG00000087088	Gm16638	predicted gene, 16638 [Source:MGI Symbol;Acc:MGI:4439562]	antisense	0.445443	0.310719	0.3769	0.168572	0.181918	0.160737	2.21636	1.14819	0.00436627	up	yes
ENSMUSG00000019942	Cdk1	cyclin-dependent kinase 1 [Source:MGI Symbol;Acc:MGI:88351]	protein_coding;retained_intron	10.0972	12.6872	9.88429	5.82682	7.64797	6.3315	1.64941	0.721947	0.0043674	up	no
ENSMUSG00000040123	Zmym5	zinc finger, MYM-type 5 [Source:MGI Symbol;Acc:MGI:3041170]	protein_coding;processed_transcript;nonsense_mediated_decay	5.16328	3.9388	2.845	1.18601	2.31577	2.71519	1.92169	0.942376	0.00437316	up	no
ENSMUSG00000078931	Pdf	peptide deformylase (mitochondrial) [Source:MGI Symbol;Acc:MGI:1915273]	protein_coding;nonsense_mediated_decay	8.93502	11.8986	9.97651	7.28622	2.2413	2.47567	2.56683	1.35999	0.00442976	up	yes
ENSMUSG00000111291	Gm48604	predicted gene, 48604 [Source:MGI Symbol;Acc:MGI:6098186]	lincRNA	2.78233	1.75929	2.68235	0.179146	1.20486	1.12091	2.88393	1.52803	0.00449197	up	yes
ENSMUSG00000028654	Mycl	v-myc avian myelocytomatosis viral oncogene lung carcinoma derived [Source:MGI Symbol;Acc:MGI:96799]	protein_coding;processed_transcript	5.10582	3.9173	4.76676	2.78471	2.38892	2.54613	1.78631	0.836983	0.0045998	up	no
ENSMUSG00000056313	Tcim	transcriptional and immune response regulator [Source:MGI Symbol;Acc:MGI:1916318]	protein_coding	6.56748	6.31847	6.2845	1.5467	4.02455	3.7968	2.04636	1.03306	0.00463078	up	yes
ENSMUSG00000027496	Aurka	aurora kinase A [Source:MGI Symbol;Acc:MGI:894678]	protein_coding;retained_intron	7.94717	8.2613	7.81574	4.55841	4.62945	4.80811	1.71651	0.779478	0.00473745	up	no
ENSMUSG00000047534	Mis18bp1	MIS18 binding protein 1 [Source:MGI Symbol;Acc:MGI:2145099]	protein_coding;retained_intron	1.33054	1.10272	1.19197	0.181904	0.616671	0.755663	2.33249	1.22187	0.00475609	up	yes
ENSMUSG00000042988	Notum	notum palmitoleoyl-protein carboxylesterase [Source:MGI Symbol;Acc:MGI:1924833]	protein_coding;retained_intron	0.392346	0.650735	0.632977	0.264259	0.116842	0.229547	2.74472	1.45666	0.00478989	up	yes
ENSMUSG00000020262	Adarb1	adenosine deaminase, RNA-specific, B1 [Source:MGI Symbol;Acc:MGI:891999]	nonsense_mediated_decay;protein_coding;retained_intron	6.78414	5.6216	6.28228	3.9078	3.57488	4.09648	1.61394	0.690583	0.00480945	up	no
ENSMUSG00000040997	Abhd4	abhydrolase domain containing 4 [Source:MGI Symbol;Acc:MGI:1915938]	protein_coding;retained_intron;nonsense_mediated_decay	43.5002	42.0142	41.9815	19.2774	35.8906	20.1142	1.69358	0.760072	0.00494692	up	no
ENSMUSG00000093672	Gm20655	predicted gene 20655 [Source:MGI Symbol;Acc:MGI:5313102]	antisense	0.516635	0.589533	0.686425	0.125702	0.323291	0.274833	2.47655	1.30833	0.00500603	up	yes
ENSMUSG00000041679	Lrrc29	leucine rich repeat containing 29 [Source:MGI Symbol;Acc:MGI:2443262]	protein_coding;nonsense_mediated_decay	0.654009	0.404519	0.334713	0.169407	0.142065	0.236785	2.54122	1.34552	0.00516569	up	yes
ENSMUSG00000028643	Svbp	small vasohibin binding protein [Source:MGI Symbol;Acc:MGI:1916466]	protein_coding	45.5199	43.872	35.5174	9.30278	7.98977	35.237	2.37788	1.24968	0.00518333	up	yes
ENSMUSG00000022322	Shcbp1	Shc SH2-domain binding protein 1 [Source:MGI Symbol;Acc:MGI:1338802]	retained_intron;protein_coding	2.07975	2.51919	2.35415	0.635795	1.2501	1.66124	1.9602	0.971003	0.00521705	up	no
ENSMUSG00000048327	Ckap2l	cytoskeleton associated protein 2-like [Source:MGI Symbol;Acc:MGI:1917716]	protein_coding	8.48606	10.5149	9.78662	3.22167	5.90716	7.07094	1.77704	0.829473	0.00522435	up	no
ENSMUSG00000028312	Smc2	structural maintenance of chromosomes 2 [Source:MGI Symbol;Acc:MGI:106067]	protein_coding;processed_transcript	5.21956	6.20472	6.72917	1.20005	3.75275	4.10068	2.00514	1.0037	0.00551062	up	yes
ENSMUSG00000007682	Dio2	deiodinase, iodothyronine, type II [Source:MGI Symbol;Acc:MGI:1338833]	protein_coding	7.96013	8.39124	9.08418	2.36254	5.6499	6.07725	1.80526	0.852206	0.00554769	up	no
ENSMUSG00000031431	Tsc22d3	TSC22 domain family, member 3 [Source:MGI Symbol;Acc:MGI:1196284]	processed_transcript;protein_coding;retained_intron	12.4669	12.8419	11.5457	6.75876	8.26642	8.18083	1.58814	0.667341	0.00569222	up	no
ENSMUSG00000086841	2410006H16Rik	RIKEN cDNA 2410006H16 gene [Source:MGI Symbol;Acc:MGI:1916471]	processed_transcript	188.793	177.416	177.572	85.349	125.292	132.62	1.58416	0.663717	0.00571323	up	no
ENSMUSG00000034023	Fancd2	Fanconi anemia, complementation group D2 [Source:MGI Symbol;Acc:MGI:2448480]	protein_coding;retained_intron;nonsense_mediated_decay	1.11619	0.984335	1.05496	0.458459	0.542921	0.650263	1.91051	0.933959	0.00583621	up	no
ENSMUSG00000005505	Kbtbd4	kelch repeat and BTB (POZ) domain containing 4 [Source:MGI Symbol;Acc:MGI:1914386]	protein_coding;processed_transcript	8.07233	7.66662	2.68125	2.20917	2.74433	3.66082	2.13832	1.09648	0.00587343	up	yes
ENSMUSG00000024989	Cep55	centrosomal protein 55 [Source:MGI Symbol;Acc:MGI:1921357]	protein_coding;retained_intron	6.87873	4.44073	4.61293	1.84394	3.91761	2.57085	1.9121	0.935157	0.00613702	up	no
ENSMUSG00000040599	Mis12	MIS12 kinetochore complex component [Source:MGI Symbol;Acc:MGI:1914389]	protein_coding	14.3659	3.4437	16.7352	6.85644	1.65932	1.7583	3.36234	1.74946	0.0062625	up	yes
ENSMUSG00000040167	Ikzf5	IKAROS family zinc finger 5 [Source:MGI Symbol;Acc:MGI:1914393]	protein_coding;retained_intron	2.84876	4.21047	2.57573	1.55967	2.20153	1.52759	1.82177	0.86534	0.00631131	up	no
ENSMUSG00000041817	Fam169a	family with sequence similarity 169, member A [Source:MGI Symbol;Acc:MGI:2444268]	protein_coding	0.156583	0.0841177	0.148579	0.0321778	0.0803757	0.0169633	3.00563	1.58767	0.00678335	up	yes
ENSMUSG00000057880	Abat	4-aminobutyrate aminotransferase [Source:MGI Symbol;Acc:MGI:2443582]	protein_coding;retained_intron;processed_transcript	0.158124	0.113092	0.174182	0.0765461	0.0566043	0.0374691	2.61048	1.38431	0.0068143	up	yes
ENSMUSG00000049866	Arl4c	ADP-ribosylation factor-like 4C [Source:MGI Symbol;Acc:MGI:2445172]	protein_coding;nonsense_mediated_decay	14.699	13.821	14.9821	9.21892	9.6181	8.99911	1.56279	0.644127	0.0068306	up	no
ENSMUSG00000042606	Hirip3	HIRA interacting protein 3 [Source:MGI Symbol;Acc:MGI:2142364]	retained_intron;protein_coding;processed_transcript	5.03671	4.79144	4.98411	2.41929	3.0529	3.20628	1.70678	0.77128	0.00690579	up	no
ENSMUSG00000025257	Ribc1	RIB43A domain with coiled-coils 1 [Source:MGI Symbol;Acc:MGI:1913861]	protein_coding;processed_transcript	0.873186	1.51142	1.0202	0.263933	0.494846	0.633841	2.44489	1.28977	0.00693481	up	yes
ENSMUSG00000082585	Gm15387	predicted gene 15387 [Source:MGI Symbol;Acc:MGI:3705374]	processed_pseudogene	94.0773	99.6517	97.4177	50.6183	75.162	58.3465	1.58123	0.661047	0.00697246	up	no
ENSMUSG00000016179	Camk1g	calcium/calmodulin-dependent protein kinase I gamma [Source:MGI Symbol;Acc:MGI:2388073]	protein_coding;retained_intron	16.4105	13.905	14.5796	9.34029	9.11667	9.22557	1.62178	0.697583	0.00699005	up	no
ENSMUSG00000026039	Sgo2a	shugoshin 2A [Source:MGI Symbol;Acc:MGI:1098767]	protein_coding;retained_intron	1.85941	1.87096	1.806	0.386641	1.05954	1.26279	2.04372	1.03119	0.00723357	up	yes
ENSMUSG00000019845	Tube1	epsilon-tubulin 1 [Source:MGI Symbol;Acc:MGI:1919174]	protein_coding;retained_intron;nonsense_mediated_decay;processed_transcript	0.637629	0.574716	0.600151	0.190809	0.327	0.371361	2.03841	1.02745	0.00726824	up	yes
ENSMUSG00000038379	Ttk	Ttk protein kinase [Source:MGI Symbol;Acc:MGI:1194921]	protein_coding;processed_transcript;retained_intron	3.47544	3.3879	3.81311	1.01173	2.05931	2.67077	1.85942	0.894855	0.00748355	up	no
ENSMUSG00000017716	Birc5	baculoviral IAP repeat-containing 5 [Source:MGI Symbol;Acc:MGI:1203517]	protein_coding	10.097	9.09393	9.11233	6.02237	5.7805	5.47382	1.63823	0.712142	0.00749314	up	no
ENSMUSG00000094365	Gm21982	predicted gene 21982 [Source:MGI Symbol;Acc:MGI:5439451]	retained_intron	0.155561	0.410454	3.09455	0.403222	0.159453	0.05287	5.94686	2.57213	0.00754391	up	yes
ENSMUSG00000096006	Gm21596	predicted gene, 21596 [Source:MGI Symbol;Acc:MGI:5434951]	processed_pseudogene	39.5733	42.7054	41.3949	20.503	31.9283	25.6073	1.58477	0.664276	0.00771589	up	no
ENSMUSG00000042390	Gatad2b	GATA zinc finger domain containing 2B [Source:MGI Symbol;Acc:MGI:2443225]	protein_coding;retained_intron	6.51834	5.78018	5.65854	1.02597	1.76269	5.35007	2.20638	1.14168	0.00784255	up	yes
ENSMUSG00000021097	Clmn	calmin [Source:MGI Symbol;Acc:MGI:2136957]	protein_coding;nonsense_mediated_decay;processed_transcript	0.96535	0.868512	1.20068	0.639942	0.478691	0.493816	1.88194	0.912223	0.00784341	up	no
ENSMUSG00000034206	Polq	polymerase (DNA directed), theta [Source:MGI Symbol;Acc:MGI:2155399]	retained_intron;nonsense_mediated_decay;protein_coding	0.457617	0.445751	0.552954	0.089236	0.246324	0.311864	2.24941	1.16955	0.00789285	up	yes
ENSMUSG00000057886	Cbx3-ps6	chromobox 3, pseudogene 6 [Source:MGI Symbol;Acc:MGI:3646710]	processed_pseudogene	2.10943	1.34784	2.16461	0.874499	0.86663	0.458724	2.55558	1.35365	0.00794813	up	yes
ENSMUSG00000039070	Cpa4	carboxypeptidase A4 [Source:MGI Symbol;Acc:MGI:1919041]	protein_coding	1.30441	1.29371	1.46067	0.631764	0.713275	0.637354	2.04742	1.03381	0.00799198	up	yes
ENSMUSG00000036777	Anln	anillin, actin binding protein [Source:MGI Symbol;Acc:MGI:1920174]	protein_coding;retained_intron	8.6257	9.30009	9.66235	3.16869	6.29361	7.10883	1.66483	0.735376	0.00803853	up	no
ENSMUSG00000009633	G0s2	G0/G1 switch gene 2 [Source:MGI Symbol;Acc:MGI:1316737]	protein_coding	158.143	143.444	141.576	84.1681	107.349	98.4686	1.52823	0.611858	0.00805545	up	no
ENSMUSG00000040204	Pclaf	PCNA clamp associated factor [Source:MGI Symbol;Acc:MGI:1915276]	protein_coding;retained_intron	4.87475	5.71163	4.23448	2.9134	3.25951	2.55652	1.6978	0.76367	0.00810879	up	no
ENSMUSG00000069793	Slfn9	schlafen 9 [Source:MGI Symbol;Acc:MGI:2445121]	protein_coding	0.527127	0.868356	0.822574	0.161223	0.398106	0.438459	2.22298	1.15249	0.00813444	up	yes
ENSMUSG00000001833	Sept7	septin 7 [Source:MGI Symbol;Acc:MGI:1335094]	retained_intron;protein_coding;processed_transcript	15.7071	18.6017	18.8257	6.64466	11.972	13.8661	1.63578	0.709974	0.0081875	up	no
ENSMUSG00000078864	Gm14322	predicted gene 14322 [Source:MGI Symbol;Acc:MGI:3652185]	protein_coding;processed_transcript	1.44525	0.710246	1.01067	0.252417	0.491671	0.548984	2.44856	1.29193	0.00829776	up	yes
ENSMUSG00000024176	Sox8	SRY (sex determining region Y)-box 8 [Source:MGI Symbol;Acc:MGI:98370]	protein_coding	5.71869	5.30395	5.32458	2.98951	3.63181	3.09448	1.68254	0.750642	0.00832603	up	no
ENSMUSG00000060807	Serpina6	serine (or cysteine) peptidase inhibitor, clade A, member 6 [Source:MGI Symbol;Acc:MGI:88278]	protein_coding	0.710273	0.56133	0.827388	0.165804	0.476018	0.133206	2.70828	1.43738	0.00848002	up	yes
ENSMUSG00000054717	Hmgb2	high mobility group box 2 [Source:MGI Symbol;Acc:MGI:96157]	protein_coding;processed_transcript	15.992	15.7234	17.6746	6.17367	11.2998	12.4066	1.65294	0.725034	0.00851019	up	no
ENSMUSG00000027276	Jag1	jagged 1 [Source:MGI Symbol;Acc:MGI:1095416]	protein_coding;retained_intron	4.89135	4.67296	4.91756	1.62629	3.43833	3.37639	1.71566	0.778762	0.00878653	up	no
ENSMUSG00000026622	Nek2	NIMA (never in mitosis gene a)-related expressed kinase 2 [Source:MGI Symbol;Acc:MGI:109359]	protein_coding;retained_intron;processed_transcript	4.53745	4.01661	4.46024	2.46023	2.63867	2.76636	1.65466	0.726533	0.00881548	up	no
ENSMUSG00000082809	Gm14150	predicted gene 14150 [Source:MGI Symbol;Acc:MGI:3651006]	processed_pseudogene	12.7782	6.4312	53.0547	11.1992	6.17061	6.52613	3.02412	1.59651	0.00888399	up	yes
ENSMUSG00000021578	Ccdc127	coiled-coil domain containing 127 [Source:MGI Symbol;Acc:MGI:1914683]	protein_coding;nonsense_mediated_decay;processed_transcript	6.26659	6.70204	5.75134	3.11106	3.47924	5.11424	1.59938	0.677511	0.00893526	up	no
ENSMUSG00000020415	Pttg1	pituitary tumor-transforming gene 1 [Source:MGI Symbol;Acc:MGI:1353578]	protein_coding;retained_intron;processed_transcript;nonsense_mediated_decay	15.3391	12.9965	12.2877	8.46399	7.89274	8.36145	1.64346	0.716734	0.0092012	up	no
ENSMUSG00000031596	Slc7a2	solute carrier family 7 (cationic amino acid transporter, y+ system), member 2 [Source:MGI Symbol;Acc:MGI:99828]	protein_coding	9.55213	8.34407	10.3627	1.43145	5.71481	6.76987	2.03066	1.02195	0.00934322	up	yes
ENSMUSG00000044783	Hjurp	Holliday junction recognition protein [Source:MGI Symbol;Acc:MGI:2685821]	protein_coding;retained_intron	11.2858	9.89327	11.5608	6.86458	8.11059	5.82385	1.57411	0.654533	0.00936139	up	no
ENSMUSG00000072980	Oip5	Opa interacting protein 5 [Source:MGI Symbol;Acc:MGI:1917895]	protein_coding;retained_intron	2.69021	3.40296	2.39526	0.962626	1.74649	1.55828	1.98914	0.992142	0.00944703	up	no
ENSMUSG00000061371	Zfp873	zinc finger protein 873 [Source:MGI Symbol;Acc:MGI:3040689]	protein_coding;retained_intron;processed_transcript	1.70974	1.97375	1.85888	0.515997	1.39572	0.74348	2.08736	1.06168	0.00951216	up	yes
ENSMUSG00000056133	Unc93a2	unc-93 homolog A2 [Source:MGI Symbol;Acc:MGI:3712668]	protein_coding;nonsense_mediated_decay	0.833553	1.00774	1.02845	0.35037	0.597127	0.407347	2.11814	1.0828	0.00954351	up	yes
ENSMUSG00000026640	Plxna2	plexin A2 [Source:MGI Symbol;Acc:MGI:107684]	protein_coding;retained_intron;processed_transcript;nonsense_mediated_decay	4.77305	4.85144	5.53744	2.39303	3.55211	3.81833	1.55292	0.634986	0.00960339	up	no
ENSMUSG00000027220	Syt13	synaptotagmin XIII [Source:MGI Symbol;Acc:MGI:1933945]	protein_coding	44.1539	38.9301	41.0684	26.7745	27.8714	26.6512	1.52714	0.610836	0.00978786	up	no
ENSMUSG00000054863	Fam19a5	family with sequence similarity 19, member A5 [Source:MGI Symbol;Acc:MGI:2146182]	protein_coding	4.36621	4.26869	4.39767	2.73008	2.50532	2.03123	1.79348	0.842764	0.00980467	up	no
ENSMUSG00000036061	Smug1	single-strand selective monofunctional uracil DNA glycosylase [Source:MGI Symbol;Acc:MGI:1918976]	protein_coding;retained_intron;processed_transcript	5.75502	6.02838	5.90809	2.16932	3.05235	5.07902	1.71751	0.780315	0.00981039	up	no
ENSMUSG00000031740	Mmp2	matrix metallopeptidase 2 [Source:MGI Symbol;Acc:MGI:97009]	protein_coding;retained_intron;processed_transcript	607.202	619.499	630.452	305.565	444.991	460.302	1.53375	0.617063	0.00983662	up	no
ENSMUSG00000034329	Brip1	BRCA1 interacting protein C-terminal helicase 1 [Source:MGI Symbol;Acc:MGI:2442836]	protein_coding;processed_transcript	0.947613	0.741487	0.849392	0.302479	0.471758	0.552461	1.91339	0.936131	0.0099637	up	no
ENSMUSG00000091475	2810468N07Rik	RIKEN cDNA 2810468N07 gene [Source:MGI Symbol;Acc:MGI:1920084]	antisense	0.942095	0.489051	0.736613	0.244221	0.408549	0.272381	2.34314	1.22844	0.00996568	up	yes
ENSMUSG00000002266	Zim1	zinc finger, imprinted 1 [Source:MGI Symbol;Acc:MGI:1341879]	protein_coding;processed_transcript	2.72892	2.31119	2.56032	1.19703	1.22635	2.0168	1.71174	0.775464	0.00999061	up	no
ENSMUSG00000107145	Gm43442	predicted gene 43442 [Source:MGI Symbol;Acc:MGI:5663579]	processed_pseudogene	5.67953	2.20959	0.906307	1.42282	0.472125	0.526925	3.63167	1.86063	0.0100315	up	yes
ENSMUSG00000082662	Gm15516	predicted gene 15516 [Source:MGI Symbol;Acc:MGI:3782963]	processed_pseudogene	1.06842	47.1441	25.6812	5.21468	3.23713	7.82824	4.53891	2.18235	0.0100567	up	yes
ENSMUSG00000025758	Plk4	polo like kinase 4 [Source:MGI Symbol;Acc:MGI:101783]	retained_intron;nonsense_mediated_decay;protein_coding	3.06538	3.25265	2.63633	1.17775	1.50006	2.44681	1.74732	0.805145	0.0100814	up	no
ENSMUSG00000034525	Ice1	interactor of little elongation complex ELL subunit 1 [Source:MGI Symbol;Acc:MGI:2385865]	protein_coding;nonsense_mediated_decay;processed_transcript	10.2301	10.8133	8.86058	4.55556	6.46469	8.02268	1.57035	0.651083	0.0100815	up	no
ENSMUSG00000038141	Tmem181a	transmembrane protein 181A [Source:MGI Symbol;Acc:MGI:1924356]	processed_transcript;protein_coding	4.73012	5.16786	4.56542	2.99397	2.30948	3.45311	1.65172	0.723971	0.0102155	up	no
ENSMUSG00000096795	Zfp433	zinc finger protein 433 [Source:MGI Symbol;Acc:MGI:1920860]	protein_coding;processed_transcript	0.675825	0.819912	0.594267	0.210645	0.428724	0.311823	2.19725	1.1357	0.0102887	up	yes
ENSMUSG00000098090	2700099C18Rik	RIKEN cDNA 2700099C18 gene [Source:MGI Symbol;Acc:MGI:1924272]	processed_transcript;transcribed_unprocessed_pseudogene	2.3345	2.61594	1.80228	0.527693	1.1645	1.5029	2.11346	1.07961	0.0103568	up	yes
ENSMUSG00000029910	Mad2l1	MAD2 mitotic arrest deficient-like 1 [Source:MGI Symbol;Acc:MGI:1860374]	protein_coding;retained_intron;processed_transcript	3.87818	4.20237	4.16383	1.66718	3.0002	2.85446	1.62784	0.702962	0.0103999	up	no
ENSMUSG00000022103	Gfra2	glial cell line derived neurotrophic factor family receptor alpha 2 [Source:MGI Symbol;Acc:MGI:1195462]	protein_coding	1.16754	1.284	1.31616	0.538033	0.848562	0.49918	1.99796	0.998526	0.0104473	up	no
ENSMUSG00000074578	Zfas1	zinc finger, NFX1-type containing 1, antisense RNA 1 [Source:MGI Symbol;Acc:MGI:1916199]	antisense;retained_intron	19.0474	18.5671	19.7088	5.74709	14.4708	13.4894	1.70062	0.766061	0.0105959	up	no
ENSMUSG00000054263	Lifr	LIF receptor alpha [Source:MGI Symbol;Acc:MGI:96788]	protein_coding;nonsense_mediated_decay;processed_transcript	10.6096	9.9802	10.5637	4.72993	8.33586	6.96083	1.5556	0.637475	0.0107363	up	no
ENSMUSG00000029414	Kntc1	kinetochore associated 1 [Source:MGI Symbol;Acc:MGI:2673709]	protein_coding;retained_intron;nonsense_mediated_decay;processed_transcript	1.64677	1.95335	2.31868	0.704746	1.00664	1.56637	1.80575	0.852595	0.0107731	up	no
ENSMUSG00000018362	Kpna2	karyopherin (importin) alpha 2 [Source:MGI Symbol;Acc:MGI:103561]	protein_coding;nonsense_mediated_decay;retained_intron	37.5894	32.284	37.6042	17.6239	24.2056	27.8412	1.54265	0.625411	0.0108883	up	no
ENSMUSG00000069910	Spdl1	spindle apparatus coiled-coil protein 1 [Source:MGI Symbol;Acc:MGI:1917635]	protein_coding;retained_intron	2.40525	2.67647	2.86314	0.777429	1.59231	1.81751	1.89739	0.92402	0.0111765	up	no
ENSMUSG00000022253	Nadk2	NAD kinase 2, mitochondrial [Source:MGI Symbol;Acc:MGI:1915896]	protein_coding;processed_transcript;retained_intron	5.61324	6.03592	6.51552	2.71923	4.39066	4.17932	1.60903	0.686192	0.0114118	up	no
ENSMUSG00000041064	Pif1	PIF1 5'-to-3' DNA helicase [Source:MGI Symbol;Acc:MGI:2143057]	retained_intron;nonsense_mediated_decay;protein_coding	1.55772	1.12352	1.24714	0.485853	0.786502	0.790296	1.90453	0.929433	0.0116103	up	no
ENSMUSG00000094410	Gm38394	predicted gene, 38394 [Source:MGI Symbol;Acc:MGI:5614057]	protein_coding;nonsense_mediated_decay	14.9541	19.7824	9.43101	0.007935	4.90603	2.73992	5.77061	2.52872	0.0116621	up	yes
ENSMUSG00000091754	Gm3636	predicted gene 3636 [Source:MGI Symbol;Acc:MGI:3781812]	protein_coding	1.30081	1.50127	0.893222	0.236693	0.409246	0.875901	2.42818	1.27988	0.0118596	up	yes
ENSMUSG00000027832	Ptx3	pentraxin related gene [Source:MGI Symbol;Acc:MGI:104641]	protein_coding;retained_intron	1.60518	1.28471	1.42971	0.461229	0.937632	0.757858	2.00285	1.00206	0.0119158	up	yes
ENSMUSG00000043542	Zc2hc1a	zinc finger, C2HC-type containing 1A [Source:MGI Symbol;Acc:MGI:1914556]	protein_coding;retained_intron	14.0711	15.0981	12.0079	5.07566	10.3427	9.68898	1.64004	0.713734	0.0119342	up	no
ENSMUSG00000001403	Ube2c	ubiquitin-conjugating enzyme E2C [Source:MGI Symbol;Acc:MGI:1915862]	protein_coding	14.3616	12.398	11.512	9.36982	6.88376	6.31359	1.6959	0.762049	0.011971	up	no
ENSMUSG00000029177	Cenpa	centromere protein A [Source:MGI Symbol;Acc:MGI:88375]	retained_intron;nonsense_mediated_decay;protein_coding	3.3635	3.65963	4.18345	2.13172	2.4399	2.3249	1.62496	0.700405	0.0119956	up	no
ENSMUSG00000058290	Espl1	extra spindle pole bodies 1, separase [Source:MGI Symbol;Acc:MGI:2146156]	protein_coding;nonsense_mediated_decay;retained_intron	1.87596	1.88424	1.82814	1.03734	0.951644	1.33793	1.67974	0.748238	0.0119959	up	no
ENSMUSG00000021714	Cenpk	centromere protein K [Source:MGI Symbol;Acc:MGI:1926210]	nonsense_mediated_decay;protein_coding;retained_intron;processed_transcript	0.952095	1.05141	1.16714	0.40916	0.737166	0.502932	1.92247	0.942959	0.0121795	up	no
ENSMUSG00000089774	Slc5a3	solute carrier family 5 (inositol transporters), member 3 [Source:MGI Symbol;Acc:MGI:1858226]	protein_coding;processed_transcript	1.06979	0.703734	0.791629	0.314781	0.53208	0.542312	1.84653	0.884819	0.0122375	up	no
ENSMUSG00000041966	Dcaf17	DDB1 and CUL4 associated factor 17 [Source:MGI Symbol;Acc:MGI:1923013]	protein_coding;nonsense_mediated_decay;processed_transcript	1.09313	0.336584	1.19646	0.323784	0.313994	0.526558	2.25552	1.17346	0.0123969	up	yes
ENSMUSG00000093979	Gm2237	predicted gene 2237 [Source:MGI Symbol;Acc:MGI:3780407]	protein_coding	0.497634	0.311724	0.647378	0.201459	0.238026	0.171427	2.38453	1.2537	0.0125593	up	yes
ENSMUSG00000030641	Ddias	DNA damage-induced apoptosis suppressor [Source:MGI Symbol;Acc:MGI:1921291]	protein_coding;processed_transcript	1.21621	1.06434	1.40077	0.438978	0.892134	0.508378	2.00127	1.00092	0.0127347	up	yes
ENSMUSG00000026779	Mastl	microtubule associated serine/threonine kinase-like [Source:MGI Symbol;Acc:MGI:1914371]	protein_coding;processed_transcript	2.22945	2.58516	2.76648	0.7748	1.66961	1.79073	1.79005	0.839997	0.012988	up	no
ENSMUSG00000059939	9430015G10Rik	RIKEN cDNA 9430015G10 gene [Source:MGI Symbol;Acc:MGI:2444364]	protein_coding;processed_transcript	6.77715	6.24958	6.88506	3.03666	4.59433	4.7571	1.60733	0.68467	0.013066	up	no
ENSMUSG00000033453	Adamts15	a disintegrin-like and metallopeptidase (reprolysin type) with thrombospondin type 1 motif, 15 [Source:MGI Symbol;Acc:MGI:2449569]	protein_coding;retained_intron	0.347809	0.381109	0.340099	0.179865	0.193659	0.167924	1.97436	0.981387	0.0131841	up	no
ENSMUSG00000039307	Hexdc	hexosaminidase (glycosyl hydrolase family 20, catalytic domain) containing [Source:MGI Symbol;Acc:MGI:3605542]	protein_coding;processed_transcript	7.32557	6.08676	6.39109	4.23037	4.30259	3.93169	1.58877	0.667908	0.0134408	up	no
ENSMUSG00000048521	Cxcr6	chemokine (C-X-C motif) receptor 6 [Source:MGI Symbol;Acc:MGI:1934582]	protein_coding	1.82722	2.01637	1.63806	0.8305	0.805881	1.11636	1.99135	0.993744	0.01351	up	no
ENSMUSG00000025323	Sp4	trans-acting transcription factor 4 [Source:MGI Symbol;Acc:MGI:107595]	protein_coding	0.622946	0.630679	0.886006	0.333409	0.394761	0.382674	1.92613	0.945706	0.0135341	up	no
ENSMUSG00000008575	Nfib	nuclear factor I/B [Source:MGI Symbol;Acc:MGI:103188]	protein_coding;processed_transcript;retained_intron	2.89361	2.00218	2.35099	1.22551	2.00929	0.847379	1.77522	0.827998	0.0136046	up	no
ENSMUSG00000056531	Ccdc18	coiled-coil domain containing 18 [Source:MGI Symbol;Acc:MGI:1922974]	protein_coding;retained_intron;processed_transcript;nonsense_mediated_decay	0.322946	0.288867	0.388504	0.0722644	0.178976	0.201589	2.20904	1.14342	0.0136071	up	yes
ENSMUSG00000019773	Fbxo5	F-box protein 5 [Source:MGI Symbol;Acc:MGI:1914391]	protein_coding;processed_transcript	5.22262	5.98857	6.36847	2.34185	3.78056	3.99292	1.73792	0.797364	0.0136754	up	no
ENSMUSG00000023015	Racgap1	Rac GTPase-activating protein 1 [Source:MGI Symbol;Acc:MGI:1349423]	protein_coding;retained_intron;processed_transcript;nonsense_mediated_decay	13.2047	13.0089	13.1483	8.48422	8.59888	9.17699	1.49893	0.583932	0.0136761	up	no
ENSMUSG00000024778	Fas	Fas (TNF receptor superfamily member 6) [Source:MGI Symbol;Acc:MGI:95484]	nonsense_mediated_decay;protein_coding;processed_transcript	9.27154	8.91237	10.1341	3.45609	6.96792	6.43262	1.67993	0.748403	0.0139231	up	no
ENSMUSG00000093565	Rab26os	RAB26, member RAS oncogene family, opposite strand [Source:MGI Symbol;Acc:MGI:1922864]	antisense	4.88727	4.4039	4.32595	1.52403	2.64289	2.40218	2.0729	1.05165	0.0139576	up	yes
ENSMUSG00000022673	Mcm4	minichromosome maintenance complex component 4 [Source:MGI Symbol;Acc:MGI:103199]	protein_coding	14.0008	13.5908	14.7182	6.91265	10.4284	10.2052	1.53596	0.619141	0.0140175	up	no
ENSMUSG00000006010	Odr4	odr4 GPCR localization factor homolog [Source:MGI Symbol;Acc:MGI:2385108]	protein_coding;processed_transcript;retained_intron;nonsense_mediated_decay	13.2404	5.53054	6.73174	2.18254	5.04945	5.99019	1.92878	0.947688	0.0140349	up	no
ENSMUSG00000117924	Tmem223	transmembrane protein 223 [Source:NCBI gene;Acc:66836]	protein_coding	2.02237	1.58814	1.215	0.730057	0.565369	0.850595	2.24859	1.16902	0.0142153	up	yes
ENSMUSG00000084799	Ino80dos	INO80 complex subunit D, opposite strand [Source:MGI Symbol;Acc:MGI:3651861]	lincRNA	0.449533	0.644198	0.427869	0.29664	0.112319	0.201011	2.49455	1.31878	0.0142183	up	yes
ENSMUSG00000060989	Gm11847	predicted gene 11847 [Source:MGI Symbol;Acc:MGI:3651787]	processed_pseudogene	25.2647	26.9764	42.0422	17.8852	16.8378	22.3178	1.65291	0.725012	0.0145219	up	no
ENSMUSG00000030677	Kif22	kinesin family member 22 [Source:MGI Symbol;Acc:MGI:109233]	protein_coding;retained_intron	5.15175	5.32493	4.87366	3.07755	3.36528	3.30165	1.57529	0.655614	0.0145486	up	no
ENSMUSG00000055612	Cdca7	cell division cycle associated 7 [Source:MGI Symbol;Acc:MGI:1914203]	protein_coding;processed_transcript	2.97456	3.04388	3.24858	1.54645	1.98539	1.83862	1.72555	0.787057	0.0147371	up	no
ENSMUSG00000029687	Ezh2	enhancer of zeste 2 polycomb repressive complex 2 subunit [Source:MGI Symbol;Acc:MGI:107940]	retained_intron;protein_coding;nonsense_mediated_decay;processed_transcript	5.35583	5.48745	5.70451	2.53634	3.77249	4.22521	1.57089	0.651581	0.0150653	up	no
ENSMUSG00000040084	Bub1b	BUB1B, mitotic checkpoint serine/threonine kinase [Source:MGI Symbol;Acc:MGI:1333889]	protein_coding;retained_intron	8.11039	8.16453	7.72511	5.12902	5.03823	5.28674	1.553	0.635058	0.0150879	up	no
ENSMUSG00000051220	Ercc6l	excision repair cross-complementing rodent repair deficiency complementation group 6 like [Source:MGI Symbol;Acc:MGI:2654144]	protein_coding	1.80398	2.35155	2.12119	1.12796	1.23947	1.29944	1.71174	0.775463	0.0151549	up	no
ENSMUSG00000002297	Dbf4	DBF4 zinc finger [Source:MGI Symbol;Acc:MGI:1351328]	protein_coding;retained_intron;processed_transcript	2.23832	2.24452	2.49005	1.03084	1.80194	1.43871	1.63243	0.707018	0.0151694	up	no
ENSMUSG00000051224	Tceanc	transcription elongation factor A (SII) N-terminal and central domain containing [Source:MGI Symbol;Acc:MGI:2685236]	protein_coding	0.96381	0.893759	0.808866	0.079557	0.213613	0.695649	2.69658	1.43113	0.0152472	up	yes
ENSMUSG00000006715	Gmnn	geminin [Source:MGI Symbol;Acc:MGI:1927344]	protein_coding;nonsense_mediated_decay	8.14652	9.2102	8.64297	4.99899	5.38367	5.11056	1.67813	0.746858	0.0152587	up	no
ENSMUSG00000025333	Gpr143	G protein-coupled receptor 143 [Source:MGI Symbol;Acc:MGI:107193]	protein_coding;retained_intron;processed_transcript	0.550797	0.664725	0.411505	0.111547	0.263514	0.315109	2.35743	1.23721	0.0154858	up	yes
ENSMUSG00000078995	Zfp456	zinc finger protein 456 [Source:MGI Symbol;Acc:MGI:3040694]	protein_coding	0.240447	0.236396	0.285959	0.0586944	0.158868	0.121503	2.24972	1.16975	0.0155681	up	yes
ENSMUSG00000045751	Mms22l	MMS22-like, DNA repair protein [Source:MGI Symbol;Acc:MGI:2684980]	retained_intron;protein_coding;processed_transcript;nonsense_mediated_decay	1.62934	1.50183	1.56131	0.866197	0.962916	0.892035	1.72445	0.786136	0.0157012	up	no
ENSMUSG00000021388	Aspn	asporin [Source:MGI Symbol;Acc:MGI:1913945]	protein_coding	2.96679	2.64939	2.29946	0.603678	2.12024	1.11198	2.06357	1.04514	0.0158708	up	yes
ENSMUSG00000028268	Gbp3	guanylate binding protein 3 [Source:MGI Symbol;Acc:MGI:1926263]	protein_coding;processed_transcript	0.319675	0.40103	0.459293	0.103016	0.263309	0.156748	2.2559	1.1737	0.0160701	up	yes
ENSMUSG00000036223	Ska1	spindle and kinetochore associated complex subunit 1 [Source:MGI Symbol;Acc:MGI:1913718]	protein_coding;nonsense_mediated_decay	2.54205	2.87602	2.75414	1.7242	1.49001	1.2018	1.85059	0.887982	0.0161631	up	no
ENSMUSG00000058402	Zfp420	zinc finger protein 420 [Source:MGI Symbol;Acc:MGI:2444666]	protein_coding;retained_intron;processed_transcript	1.21234	0.508031	0.778946	0.106721	0.374473	0.559331	2.40197	1.26422	0.0163072	up	yes
ENSMUSG00000049233	Apoo-ps	apolipoprotein O, pseudogene [Source:MGI Symbol;Acc:MGI:3649039]	processed_pseudogene	2.90513	4.38919	1.69657	1.13298	0.716583	1.856	2.42632	1.27877	0.0163248	up	yes
ENSMUSG00000074934	Grem1	gremlin 1, DAN family BMP antagonist [Source:MGI Symbol;Acc:MGI:1344337]	protein_coding	70.0844	85.8432	85.462	17.6886	55.3542	62.3097	1.78342	0.834643	0.0163819	up	no
ENSMUSG00000024301	Kifc5b	kinesin family member C5B [Source:MGI Symbol;Acc:MGI:2137414]	processed_transcript;protein_coding;retained_intron	3.42698	3.11778	3.14652	1.62093	1.74245	2.36142	1.69286	0.759465	0.0167302	up	no
ENSMUSG00000040189	Ccdc114	coiled-coil domain containing 114 [Source:MGI Symbol;Acc:MGI:2446120]	protein_coding;retained_intron	0.744974	0.601328	0.732226	0.344966	0.317113	0.436736	1.89161	0.919615	0.0170694	up	no
ENSMUSG00000035923	Myf6	myogenic factor 6 [Source:MGI Symbol;Acc:MGI:97253]	protein_coding	1.86052	1.92384	1.66195	0.417929	1.19302	0.943464	2.13212	1.09229	0.0172413	up	yes
ENSMUSG00000062510	Nsl1	NSL1, MIS12 kinetochore complex component [Source:MGI Symbol;Acc:MGI:2685830]	protein_coding	1.37351	1.14022	1.44201	0.522784	0.935071	0.72936	1.80857	0.854852	0.0172666	up	no
ENSMUSG00000051378	Kif18b	kinesin family member 18B [Source:MGI Symbol;Acc:MGI:2446979]	protein_coding;processed_transcript	5.2044	4.67731	4.96034	3.33167	2.66823	3.06367	1.63755	0.71154	0.0173106	up	no
ENSMUSG00000078427	Sarnp	SAP domain containing ribonucleoprotein [Source:MGI Symbol;Acc:MGI:1913368]	protein_coding;retained_intron;nonsense_mediated_decay;processed_transcript	18.6852	20.3132	14.8985	7.40769	13.2798	12.4562	1.62616	0.70147	0.0173149	up	no
ENSMUSG00000027326	Knl1	kinetochore scaffold 1 [Source:MGI Symbol;Acc:MGI:1923714]	protein_coding	0.955021	1.00407	1.32143	0.196361	0.682411	0.734323	2.03368	1.02409	0.0173751	up	yes
ENSMUSG00000044201	Cdc25c	cell division cycle 25C [Source:MGI Symbol;Acc:MGI:88350]	retained_intron;protein_coding;processed_transcript;nonsense_mediated_decay	2.01353	2.41952	2.11652	1.0626	1.26883	1.51499	1.70277	0.767886	0.0173806	up	no
ENSMUSG00000001435	Col18a1	collagen, type XVIII, alpha 1 [Source:MGI Symbol;Acc:MGI:88451]	protein_coding	53.3599	48.9537	49.2074	38.9598	29.3841	28.441	1.56554	0.646665	0.0174901	up	no
ENSMUSG00000051517	Arhgef39	Rho guanine nucleotide exchange factor (GEF) 39 [Source:MGI Symbol;Acc:MGI:3036286]	processed_transcript;protein_coding	2.03256	1.13558	1.76735	0.676906	1.07735	0.765053	1.95906	0.970164	0.0175013	up	no
ENSMUSG00000069763	Tmem100	transmembrane protein 100 [Source:MGI Symbol;Acc:MGI:1915138]	protein_coding	1.05435	0.578657	0.88564	0.214168	0.570471	0.322116	2.27571	1.18632	0.0175665	up	yes
ENSMUSG00000028556	Dock7	dedicator of cytokinesis 7 [Source:MGI Symbol;Acc:MGI:1914549]	protein_coding;processed_transcript;retained_intron;nonsense_mediated_decay	8.97979	10.1362	10.2927	4.1033	7.01442	7.99799	1.53845	0.621482	0.0175705	up	no
ENSMUSG00000025912	Mybl1	myeloblastosis oncogene-like 1 [Source:MGI Symbol;Acc:MGI:99925]	protein_coding;retained_intron	0.777289	1.2475	1.14435	0.182034	0.672126	0.641829	2.11843	1.08299	0.0177258	up	yes
ENSMUSG00000089901	Gm8113	predicted gene 8113 [Source:MGI Symbol;Acc:MGI:3648791]	protein_coding	1.14872	1.52251	1.70708	0.271676	0.756387	1.01082	2.14741	1.10259	0.0177961	up	yes
ENSMUSG00000035683	Melk	maternal embryonic leucine zipper kinase [Source:MGI Symbol;Acc:MGI:106924]	protein_coding;processed_transcript	5.39366	4.67651	5.32478	3.4061	2.93146	2.97192	1.65369	0.725685	0.0178397	up	no
ENSMUSG00000048668	Rhno1	RAD9-HUS1-RAD1 interacting nuclear orphan 1 [Source:MGI Symbol;Acc:MGI:1915315]	protein_coding;processed_transcript	2.66053	5.23532	4.2099	2.57126	2.44235	1.89786	1.75155	0.808629	0.017854	up	no
ENSMUSG00000059602	Syn3	synapsin III [Source:MGI Symbol;Acc:MGI:1351334]	retained_intron;protein_coding;processed_transcript	0.0218965	0.41358	0.0775193	0.069185	0.0341002	0.0177953	4.23681	2.08298	0.0178755	up	yes
ENSMUSG00000044694	2010007H06Rik	RIKEN cDNA 2010007H06 gene [Source:MGI Symbol;Acc:MGI:1917099]	antisense	1.27695	1.39934	1.2872	0.231121	0.815139	0.883554	2.05382	1.03831	0.0180998	up	yes
ENSMUSG00000094870	Zfp131	zinc finger protein 131 [Source:MGI Symbol;Acc:MGI:1919715]	protein_coding;processed_transcript;nonsense_mediated_decay	5.93465	7.10762	7.40026	2.6954	3.83311	5.9424	1.63922	0.713007	0.0182617	up	no
ENSMUSG00000110388	Gm30329	predicted gene, 30329 [Source:MGI Symbol;Acc:MGI:5589488]	antisense	0.557147	0.637269	0.719753	0.166872	0.379037	0.36935	2.0914	1.06447	0.0183947	up	yes
ENSMUSG00000037474	Dtl	denticleless E3 ubiquitin protein ligase [Source:MGI Symbol;Acc:MGI:1924093]	protein_coding;nonsense_mediated_decay;retained_intron;processed_transcript	1.0106	1.0455	0.941669	0.499574	0.668172	0.673519	1.6281	0.703192	0.0186181	up	no
ENSMUSG00000036572	Upf3b	UPF3 regulator of nonsense transcripts homolog B (yeast) [Source:MGI Symbol;Acc:MGI:1915384]	protein_coding;processed_transcript	6.17739	6.14029	6.30071	1.4181	4.44291	4.49755	1.79739	0.845904	0.0186216	up	no
ENSMUSG00000059173	Pde1a	phosphodiesterase 1A, calmodulin-dependent [Source:MGI Symbol;Acc:MGI:1201792]	protein_coding;processed_transcript;nonsense_mediated_decay	0.256464	0.294441	0.282052	0.125747	0.108611	0.165446	2.08342	1.05895	0.01863	up	yes
ENSMUSG00000085105	Gm12758	predicted gene 12758 [Source:MGI Symbol;Acc:MGI:3702543]	antisense	0.0842525	1.25223	0.860729	0.110273	0.265933	0.31175	3.19382	1.67528	0.0186313	up	yes
ENSMUSG00000085334	Gm12940	predicted gene 12940 [Source:MGI Symbol;Acc:MGI:3702626]	processed_transcript	6.48271	4.60717	5.61992	2.04459	4.69382	2.80833	1.75032	0.807616	0.0189301	up	no
ENSMUSG00000032555	Topbp1	topoisomerase (DNA) II binding protein 1 [Source:MGI Symbol;Acc:MGI:1920018]	protein_coding;retained_intron;nonsense_mediated_decay	4.50294	4.95409	5.61559	1.90995	3.53628	4.09444	1.57983	0.659766	0.0191296	up	no
ENSMUSG00000098318	Lockd	lncRNA downstream of Cdkn1b [Source:MGI Symbol;Acc:MGI:1915081]	lincRNA	0.517386	0.499327	0.372442	0.244097	0.196096	0.255815	1.99589	0.997034	0.0192507	up	no
ENSMUSG00000069171	Nr2f1	nuclear receptor subfamily 2, group F, member 1 [Source:MGI Symbol;Acc:MGI:1352451]	protein_coding;processed_transcript	3.23924	2.91862	3.16373	1.35915	2.35282	2.02487	1.62487	0.700321	0.0194824	up	no
ENSMUSG00000034413	Neurl1b	neuralized E3 ubiquitin protein ligase 1B [Source:MGI Symbol;Acc:MGI:3643092]	protein_coding	0.829898	0.543222	0.524313	0.35768	0.332503	0.281109	1.95352	0.966073	0.0196441	up	no
ENSMUSG00000027201	Myef2	myelin basic protein expression factor 2, repressor [Source:MGI Symbol;Acc:MGI:104592]	protein_coding;retained_intron;processed_transcript;nonsense_mediated_decay	7.92114	8.96786	11.2137	3.77261	5.21885	8.4148	1.61452	0.691104	0.0198188	up	no
ENSMUSG00000024136	Dnase1l2	deoxyribonuclease 1-like 2 [Source:MGI Symbol;Acc:MGI:1913955]	retained_intron;protein_coding;nonsense_mediated_decay	1.12541	0.935196	1.10018	0.251889	0.622764	0.650816	2.072	1.05103	0.019893	up	yes
ENSMUSG00000034127	Tspan8	tetraspanin 8 [Source:MGI Symbol;Acc:MGI:2384918]	protein_coding	60.6967	64.0323	60.4827	21.7588	51.0105	44.4994	1.57938	0.659355	0.0199422	up	no
ENSMUSG00000095648	Gm2004	predicted gene 2004 [Source:MGI Symbol;Acc:MGI:3780174]	protein_coding	3.21234	2.36209	2.23871	0.560857	2.20367	0.778506	2.20522	1.14092	0.0203313	up	yes
ENSMUSG00000087142	Gm12454	predicted gene 12454 [Source:MGI Symbol;Acc:MGI:3649695]	antisense	2.66106	1.23256	1.74696	0.528855	1.02607	1.06811	2.1504	1.1046	0.0203554	up	yes
ENSMUSG00000113771	Gm36529	predicted gene, 36529 [Source:MGI Symbol;Acc:MGI:5595688]	antisense	0.868082	0.765286	0.88065	0.347287	0.554839	0.114383	2.47319	1.30637	0.0205689	up	yes
ENSMUSG00000113216	Gm40841	predicted gene, 40841 [Source:MGI Symbol;Acc:MGI:5623726]	lincRNA	3.43141	1.48742	2.08021	0.534369	1.41921	1.53829	2.00438	1.00316	0.0206448	up	yes
ENSMUSG00000035131	Brinp3	bone morphogenetic protein/retinoic acid inducible neural specific 3 [Source:MGI Symbol;Acc:MGI:2443035]	nonsense_mediated_decay;protein_coding;retained_intron	44.1975	48.8114	50.7184	20.4532	36.4559	37.7349	1.51861	0.602753	0.0207285	up	no
ENSMUSG00000006014	Prg4	proteoglycan 4 (megakaryocyte stimulating factor, articular superficial zone protein) [Source:MGI Symbol;Acc:MGI:1891344]	protein_coding	2.54977	1.54859	1.07218	0.993342	0.960761	0.29439	2.29956	1.20136	0.021122	up	yes
ENSMUSG00000053846	Lipg	lipase, endothelial [Source:MGI Symbol;Acc:MGI:1341803]	protein_coding;retained_intron	1.36931	1.5191	1.53408	0.454942	1.00571	0.974722	1.81595	0.860721	0.0213984	up	no
ENSMUSG00000060149	BC002059	cDNA sequence BC002059 [Source:MGI Symbol;Acc:MGI:2384864]	lincRNA	2.9043	1.30963	1.32263	0.65343	0.981721	1.05677	2.05673	1.04035	0.0214728	up	yes
ENSMUSG00000030671	Pde3b	phosphodiesterase 3B, cGMP-inhibited [Source:MGI Symbol;Acc:MGI:1333863]	protein_coding;retained_intron	2.93781	2.77434	3.45135	1.70418	2.31597	1.91426	1.54413	0.626795	0.0215193	up	no
ENSMUSG00000066042	Med18	mediator complex subunit 18 [Source:MGI Symbol;Acc:MGI:1914469]	protein_coding	2.58831	2.2127	1.7658	0.507397	1.64966	1.09318	2.02041	1.01465	0.0215506	up	yes
ENSMUSG00000028702	Rad54l	RAD54 like (S. cerevisiae) [Source:MGI Symbol;Acc:MGI:894697]	protein_coding;processed_transcript	1.24583	1.50367	1.18462	0.702524	0.841138	0.794454	1.68261	0.750698	0.0215879	up	no
ENSMUSG00000074863	Platr25	pluripotency associated transcript 25 [Source:MGI Symbol;Acc:MGI:3645613]	protein_coding;processed_transcript;nonsense_mediated_decay	0.787385	0.812039	0.885814	0.167386	0.503522	0.574368	1.99573	0.996918	0.0216249	up	no
ENSMUSG00000041695	Kcnj2	potassium inwardly-rectifying channel, subfamily J, member 2 [Source:MGI Symbol;Acc:MGI:104744]	protein_coding	2.60198	2.70054	2.77884	1.27371	1.6106	2.11735	1.61574	0.692191	0.0218106	up	no
ENSMUSG00000026068	Il18rap	interleukin 18 receptor accessory protein [Source:MGI Symbol;Acc:MGI:1338888]	protein_coding;retained_intron	1.59322	1.62283	1.87593	0.628843	1.20833	1.15262	1.70312	0.768176	0.0218542	up	no
ENSMUSG00000020843	Timm22	translocase of inner mitochondrial membrane 22 [Source:MGI Symbol;Acc:MGI:1929742]	protein_coding;nonsense_mediated_decay	5.40019	13.424	12.026	6.82983	5.05249	5.30818	1.7946	0.843664	0.0220319	up	no
ENSMUSG00000097392	D930016D06Rik	RIKEN cDNA D930016D06 gene [Source:MGI Symbol;Acc:MGI:2442700]	lincRNA	1.62483	1.75826	1.8122	0.479088	1.36314	0.964348	1.85112	0.888395	0.022281	up	no
ENSMUSG00000037225	Fgf2	fibroblast growth factor 2 [Source:MGI Symbol;Acc:MGI:95516]	protein_coding;retained_intron;processed_transcript	1.39906	3.29022	3.82482	0.579703	1.96234	1.72646	1.99463	0.996121	0.0223885	up	no
ENSMUSG00000092397	C130080G10Rik	RIKEN cDNA C130080G10 gene [Source:MGI Symbol;Acc:MGI:4844008]	antisense	7.77047	7.10058	7.2142	2.58646	5.14386	5.7216	1.64179	0.715271	0.0225312	up	no
ENSMUSG00000099906	Gm28653	predicted gene 28653 [Source:MGI Symbol;Acc:MGI:5579359]	lincRNA	12.7868	11.1277	12.6962	3.47307	11.4489	6.67502	1.69518	0.761437	0.0228237	up	no
ENSMUSG00000100922	Gm8520	predicted gene 8520 [Source:MGI Symbol;Acc:MGI:3645038]	processed_pseudogene	1.16226	0.436954	4.77503	0.682555	0.799497	0.599338	3.06249	1.61471	0.0234207	up	yes
ENSMUSG00000017144	Rnd3	Rho family GTPase 3 [Source:MGI Symbol;Acc:MGI:1921444]	protein_coding;retained_intron	17.6505	18.4899	18.9892	9.0166	15.3216	12.8445	1.48266	0.568192	0.0234425	up	no
ENSMUSG00000026826	Nr4a2	nuclear receptor subfamily 4, group A, member 2 [Source:MGI Symbol;Acc:MGI:1352456]	nonsense_mediated_decay;protein_coding;processed_transcript	2.21008	2.4043	2.13482	1.00338	1.49865	1.50289	1.68523	0.752946	0.0238153	up	no
ENSMUSG00000013878	Rnf170	ring finger protein 170 [Source:MGI Symbol;Acc:MGI:1924983]	protein_coding;nonsense_mediated_decay;retained_intron	0.963083	0.972034	4.60548	1.23106	0.6692	0.705153	2.51039	1.32791	0.0243037	up	yes
ENSMUSG00000038290	Smg6	Smg-6 homolog, nonsense mediated mRNA decay factor (C. elegans) [Source:MGI Symbol;Acc:MGI:2144117]	protein_coding;nonsense_mediated_decay;processed_transcript;retained_intron	13.1021	12.4409	14.4455	8.50759	9.39339	9.71589	1.44797	0.534035	0.0244245	up	no
ENSMUSG00000067389	Gm17080	predicted gene 17080 [Source:MGI Symbol;Acc:MGI:4937907]	antisense	5.08995	3.88783	4.50706	1.31223	3.08102	2.56726	1.93734	0.954076	0.0244748	up	no
ENSMUSG00000032745	Gpbp1	GC-rich promoter binding protein 1 [Source:MGI Symbol;Acc:MGI:1920524]	protein_coding;nonsense_mediated_decay;processed_transcript;retained_intron	16.4669	19.3654	19.4741	9.80592	14.0376	13.7598	1.47078	0.556585	0.024513	up	no
ENSMUSG00000031134	Rbmx	RNA binding motif protein, X chromosome [Source:MGI Symbol;Acc:MGI:1343044]	nonsense_mediated_decay;protein_coding	11.7521	11.5819	12.6462	6.07914	9.22675	8.96133	1.48267	0.568197	0.0247656	up	no
ENSMUSG00000096842	Gm10736	predicted gene 10736 [Source:MGI Symbol;Acc:MGI:3704412]	processed_pseudogene	410.078	60.8101	312.511	130.54	95.3808	119.898	2.26534	1.17973	0.0248475	up	yes
ENSMUSG00000031262	Cenpi	centromere protein I [Source:MGI Symbol;Acc:MGI:2147897]	processed_transcript;protein_coding	2.16063	2.45191	2.33271	0.73041	1.52466	1.79726	1.71389	0.777275	0.0249171	up	no
ENSMUSG00000081476	Itpa-ps1	inosine triphosphatase (nucleoside triphosphate pyrophosphatase) pseudogene 1 [Source:MGI Symbol;Acc:MGI:3613363]	processed_pseudogene	2.97443	3.0977	2.27161	1.38176	1.35635	1.45187	1.99136	0.993751	0.0251139	up	no
ENSMUSG00000026767	Mindy3	MINDY lysine 48 deubiquitinase 3 [Source:MGI Symbol;Acc:MGI:1914210]	processed_transcript;protein_coding;nonsense_mediated_decay;retained_intron	3.92533	3.96912	3.24302	1.93425	2.4683	2.80997	1.54419	0.626848	0.0256967	up	no
ENSMUSG00000078429	Ctdsp2	CTD (carboxy-terminal domain, RNA polymerase II, polypeptide A) small phosphatase 2 [Source:MGI Symbol;Acc:MGI:1098748]	protein_coding;processed_transcript;retained_intron	8.00287	34.5592	7.03844	7.94835	6.9619	8.16054	2.14993	1.10429	0.0257989	up	yes
ENSMUSG00000074802	Gas2l3	growth arrest-specific 2 like 3 [Source:MGI Symbol;Acc:MGI:1918780]	protein_coding;processed_transcript	1.42765	1.5714	1.84631	0.80045	0.977007	1.17273	1.64239	0.715801	0.0258938	up	no
ENSMUSG00000070576	Mn1	meningioma 1 [Source:MGI Symbol;Acc:MGI:1261813]	protein_coding;processed_transcript	1.48437	1.34887	1.11633	0.738928	0.805177	0.811183	1.6769	0.745796	0.0260119	up	no
ENSMUSG00000068466	Gm5518	predicted gene 5518 [Source:MGI Symbol;Acc:MGI:3648673]	processed_pseudogene	45.7535	49.2785	41.4062	12.1615	35.3284	33.2829	1.68916	0.756307	0.0261127	up	no
ENSMUSG00000021767	Kat6b	K(lysine) acetyltransferase 6B [Source:MGI Symbol;Acc:MGI:1858746]	protein_coding;retained_intron;processed_transcript	1.83027	1.69872	2.01268	0.88446	1.71018	0.65817	1.70366	0.768634	0.0263795	up	no
ENSMUSG00000028212	Ccne2	cyclin E2 [Source:MGI Symbol;Acc:MGI:1329034]	protein_coding;processed_transcript	3.24556	3.6124	3.61104	1.2176	2.34444	2.63187	1.69021	0.757202	0.0264968	up	no
ENSMUSG00000021319	Sfrp4	secreted frizzled-related protein 4 [Source:MGI Symbol;Acc:MGI:892010]	protein_coding	0.786778	0.757156	0.804573	0.233056	0.393454	0.590083	1.9304	0.948898	0.0265316	up	no
ENSMUSG00000048368	Omd	osteomodulin [Source:MGI Symbol;Acc:MGI:1350918]	protein_coding	1.03136	0.938237	0.887012	0.281253	0.384856	0.745322	2.02391	1.01715	0.0267972	up	yes
ENSMUSG00000029209	Gnpda2	glucosamine-6-phosphate deaminase 2 [Source:MGI Symbol;Acc:MGI:1915230]	protein_coding;retained_intron;nonsense_mediated_decay	2.092	2.55604	2.26033	0.961861	1.69052	1.65639	1.60333	0.681069	0.0268004	up	no
ENSMUSG00000032350	Gclc	glutamate-cysteine ligase, catalytic subunit [Source:MGI Symbol;Acc:MGI:104990]	protein_coding;processed_transcript	16.6536	16.3104	16.6135	7.92447	13.4662	12.1788	1.47686	0.562535	0.0269474	up	no
ENSMUSG00000072082	Ccnf	cyclin F [Source:MGI Symbol;Acc:MGI:102551]	protein_coding;retained_intron;nonsense_mediated_decay;processed_transcript	2.45523	1.97293	2.01279	1.48077	1.09986	1.40048	1.61788	0.694106	0.027035	up	no
ENSMUSG00000031673	Cdh11	cadherin 11 [Source:MGI Symbol;Acc:MGI:99217]	protein_coding;retained_intron	13.0215	15.4541	15.2403	5.24189	11.1128	11.9364	1.54521	0.627805	0.0270896	up	no
ENSMUSG00000024592	C330018D20Rik	RIKEN cDNA C330018D20 gene [Source:MGI Symbol;Acc:MGI:1924672]	protein_coding;processed_transcript	3.9917	4.38148	3.95233	0.906432	1.29558	3.97061	1.9968	0.997693	0.0271303	up	no
ENSMUSG00000023066	Rttn	rotatin [Source:MGI Symbol;Acc:MGI:2179288]	retained_intron;protein_coding;nonsense_mediated_decay;processed_transcript	1.1638	1.32448	1.35655	0.484154	0.832009	1.04116	1.63102	0.705773	0.027222	up	no
ENSMUSG00000033446	Lpar6	lysophosphatidic acid receptor 6 [Source:MGI Symbol;Acc:MGI:1914418]	protein_coding	2.25435	1.97177	2.14604	0.607181	1.60637	1.42663	1.75051	0.807776	0.0272875	up	no
ENSMUSG00000027811	4930579G24Rik	RIKEN cDNA 4930579G24 gene [Source:MGI Symbol;Acc:MGI:1923189]	protein_coding	3.99218	4.31221	3.64791	1.91168	2.57323	2.60643	1.68548	0.753157	0.0275808	up	no
ENSMUSG00000067931	Zfp948	zinc finger protein 948 [Source:MGI Symbol;Acc:MGI:3040683]	protein_coding	6.68336	6.60523	7.58872	1.11543	4.30603	5.52765	1.90676	0.931122	0.0276751	up	no
ENSMUSG00000092203	1110038B12Rik	RIKEN cDNA 1110038B12 gene [Source:MGI Symbol;Acc:MGI:1916013]	lincRNA;retained_intron	30.2955	27.0413	29.5265	15.8886	21.6871	21.9266	1.45983	0.545803	0.0276967	up	no
ENSMUSG00000029561	Oasl2	2'-5' oligoadenylate synthetase-like 2 [Source:MGI Symbol;Acc:MGI:1344390]	protein_coding;retained_intron;nonsense_mediated_decay	0.318845	0.363312	0.446409	0.182651	0.187926	0.222756	1.90208	0.927575	0.0277905	up	no
ENSMUSG00000052446	Zfp961	zinc finger protein 961 [Source:MGI Symbol;Acc:MGI:3583954]	protein_coding;nonsense_mediated_decay;processed_transcript	1.91176	1.94589	0.222723	0.637017	0.526559	0.36315	2.67263	1.41826	0.0279893	up	yes
ENSMUSG00000053205	Styx	serine/threonine/tyrosine interaction protein [Source:MGI Symbol;Acc:MGI:1891150]	protein_coding;nonsense_mediated_decay;retained_intron	0.578865	1.23953	0.391325	0.215731	0.534972	0.359443	1.99048	0.993115	0.0280651	up	no
ENSMUSG00000114439	Gm48395	predicted gene, 48395 [Source:MGI Symbol;Acc:MGI:6097879]	lincRNA	3.05206	3.1099	2.23287	1.72156	1.22725	1.0341	2.10771	1.07567	0.028386	up	yes
ENSMUSG00000032783	Troap	trophinin associated protein [Source:MGI Symbol;Acc:MGI:1925983]	retained_intron;protein_coding	3.35837	3.55077	3.57089	2.31857	2.10196	2.0036	1.63136	0.706072	0.0283998	up	no
ENSMUSG00000050107	Haspin	histone H3 associated protein kinase [Source:MGI Symbol;Acc:MGI:1194498]	protein_coding	2.31996	2.32697	2.1225	1.55425	1.27437	0.8712	1.82967	0.87158	0.0289628	up	no
ENSMUSG00000016262	Sertad4	SERTA domain containing 4 [Source:MGI Symbol;Acc:MGI:2443496]	protein_coding;processed_transcript	76.0975	80.6841	75.6378	40.4133	63.8457	56.6032	1.44484	0.530905	0.0297481	up	no
ENSMUSG00000118383	AC132253	novel transcript	lincRNA	5.67594	4.96674	4.73194	2.20816	3.79868	3.60384	1.59974	0.677841	0.0300335	up	no
ENSMUSG00000034601	2700049A03Rik	RIKEN cDNA 2700049A03 gene [Source:MGI Symbol;Acc:MGI:1924217]	protein_coding;nonsense_mediated_decay	2.10778	2.53301	2.44837	0.972211	1.63107	1.79444	1.61201	0.688861	0.0300849	up	no
ENSMUSG00000041147	Brca2	breast cancer 2, early onset [Source:MGI Symbol;Acc:MGI:109337]	retained_intron;protein_coding;processed_transcript	0.729068	0.545932	0.750719	0.24258	0.413412	0.519389	1.72346	0.785305	0.0301232	up	no
ENSMUSG00000041633	Kctd12b	potassium channel tetramerisation domain containing 12b [Source:MGI Symbol;Acc:MGI:2444667]	protein_coding	0.484805	1.04467	0.950968	0.267478	0.456782	0.562408	1.92781	0.946959	0.0303816	up	no
ENSMUSG00000053178	Mterf1b	mitochondrial transcription termination factor 1b [Source:MGI Symbol;Acc:MGI:3704243]	protein_coding	3.38569	3.85442	2.88024	0.839836	2.64654	1.80477	1.91269	0.935607	0.030467	up	no
ENSMUSG00000031671	Setd6	SET domain containing 6 [Source:MGI Symbol;Acc:MGI:1913333]	protein_coding;nonsense_mediated_decay;processed_transcript;retained_intron	5.38872	10.5923	10.6815	5.8382	4.72219	5.07649	1.7051	0.769858	0.0304806	up	no
ENSMUSG00000025358	Cdk2	cyclin-dependent kinase 2 [Source:MGI Symbol;Acc:MGI:104772]	protein_coding;retained_intron;processed_transcript	4.33832	4.41304	9.87703	2.43475	4.23475	4.23255	1.70871	0.772904	0.0307604	up	no
ENSMUSG00000110266	Gm32742	predicted gene, 32742 [Source:MGI Symbol;Acc:MGI:5591901]	protein_coding	0.750924	0.667191	0.889505	0.229481	0.616914	0.425473	1.81435	0.859457	0.0307816	up	no
ENSMUSG00000001018	Snapin	SNAP-associated protein [Source:MGI Symbol;Acc:MGI:1333745]	protein_coding;retained_intron;nonsense_mediated_decay	38.5058	48.0523	48.4154	25.458	26.434	39.2714	1.48057	0.56615	0.0307866	up	no
ENSMUSG00000000126	Wnt9a	wingless-type MMTV integration site family, member 9A [Source:MGI Symbol;Acc:MGI:2446084]	protein_coding	35.17	28.3234	29.809	18.4766	23.7899	22.6568	1.43712	0.52318	0.0309082	up	no
ENSMUSG00000044566	Cage1	cancer antigen 1 [Source:MGI Symbol;Acc:MGI:1918463]	protein_coding	0.506761	0.561667	0.295213	0.148152	0.235207	0.301707	1.99053	0.99315	0.031002	up	no
ENSMUSG00000038583	Pln	phospholamban [Source:MGI Symbol;Acc:MGI:97622]	protein_coding	0.0773502	0.404408	0.46519	0.201224	0.0435189	0.0425111	3.29655	1.72096	0.0311077	up	yes
ENSMUSG00000024011	Pi16	peptidase inhibitor 16 [Source:MGI Symbol;Acc:MGI:1921366]	retained_intron;protein_coding	1.15575	1.04247	1.14967	0.56435	0.74916	0.682241	1.67751	0.74632	0.0311149	up	no
ENSMUSG00000027203	Dut	deoxyuridine triphosphatase [Source:MGI Symbol;Acc:MGI:1346051]	protein_coding;processed_transcript	11.9524	12.0677	12.1796	7.94394	8.49573	7.79822	1.49352	0.578714	0.0313011	up	no
ENSMUSG00000024501	Dpysl3	dihydropyrimidinase-like 3 [Source:MGI Symbol;Acc:MGI:1349762]	protein_coding;processed_transcript;nonsense_mediated_decay	54.8968	60.5324	59.4542	34.9382	42.1876	45.4919	1.42625	0.512226	0.031354	up	no
ENSMUSG00000058174	Gm5148	predicted gene 5148 [Source:MGI Symbol;Acc:MGI:3646006]	protein_coding;processed_transcript	3.28556	2.29807	2.21259	1.76242	1.41184	1.36256	1.71843	0.78109	0.0315231	up	no
ENSMUSG00000057110	Cntrl	centriolin [Source:MGI Symbol;Acc:MGI:1889576]	retained_intron;protein_coding;nonsense_mediated_decay	1.53291	2.02917	2.22404	0.566615	1.17336	1.67062	1.69652	0.762576	0.0315813	up	no
ENSMUSG00000086413	Gm12415	predicted gene 12415 [Source:MGI Symbol;Acc:MGI:3650585]	lincRNA	4.81388	3.56275	3.64373	0.929222	2.36371	2.68375	2.01121	1.00806	0.0317721	up	yes
ENSMUSG00000045658	Pid1	phosphotyrosine interaction domain containing 1 [Source:MGI Symbol;Acc:MGI:2138391]	protein_coding;retained_intron;processed_transcript	3.8153	3.97113	3.97222	2.03286	3.10093	2.78251	1.48537	0.570824	0.0317817	up	no
ENSMUSG00000035365	Parpbp	PARP1 binding protein [Source:MGI Symbol;Acc:MGI:1922567]	protein_coding	2.64543	2.84393	2.26365	0.94064	1.77923	1.86085	1.69253	0.759182	0.0317993	up	no
ENSMUSG00000031669	Gins3	GINS complex subunit 3 (Psf3 homolog) [Source:MGI Symbol;Acc:MGI:1926083]	protein_coding	4.84177	4.52675	4.23842	2.39528	2.94464	3.23451	1.58692	0.666232	0.0320613	up	no
ENSMUSG00000029126	Nsg1	neuron specific gene family member 1 [Source:MGI Symbol;Acc:MGI:109149]	protein_coding;retained_intron	21.3514	27.6327	23.1127	15.0549	19.619	14.3371	1.47103	0.556829	0.0321975	up	no
ENSMUSG00000032113	Chek1	checkpoint kinase 1 [Source:MGI Symbol;Acc:MGI:1202065]	protein_coding;processed_transcript;retained_intron	1.52543	1.5963	1.83727	0.486759	1.17671	1.14016	1.76878	0.822752	0.0323376	up	no
ENSMUSG00000091549	Gm6548	predicted gene 6548 [Source:MGI Symbol;Acc:MGI:3644071]	processed_pseudogene	9.7026	9.96942	10.3715	4.40509	5.77774	8.21601	1.6329	0.70744	0.0323715	up	no
ENSMUSG00000022636	Alcam	activated leukocyte cell adhesion molecule [Source:MGI Symbol;Acc:MGI:1313266]	protein_coding;retained_intron	4.53786	4.59921	5.10679	1.62095	3.51322	3.90294	1.57615	0.656406	0.0325037	up	no
ENSMUSG00000025921	Rdh10	retinol dehydrogenase 10 (all-trans) [Source:MGI Symbol;Acc:MGI:1924238]	retained_intron;protein_coding	7.40495	7.72612	7.3213	4.56873	5.43103	5.24605	1.47269	0.558456	0.0325786	up	no
ENSMUSG00000033228	Scaf11	SR-related CTD-associated factor 11 [Source:MGI Symbol;Acc:MGI:1919443]	protein_coding;nonsense_mediated_decay;processed_transcript	7.37127	10.1458	11.8908	4.43032	7.31463	7.71179	1.51145	0.595933	0.0326059	up	no
ENSMUSG00000091900	Gm4353	predicted gene 4353 [Source:MGI Symbol;Acc:MGI:3782538]	protein_coding	1.94832	1.27273	0.932739	0.876811	0.617115	0.486625	2.09729	1.06852	0.0326189	up	yes
ENSMUSG00000096858	Olfr805	olfactory receptor 805 [Source:MGI Symbol;Acc:MGI:3030639]	protein_coding	3.0805	2.58014	3.41211	0.698916	2.18068	2.11183	1.81767	0.862087	0.0329005	up	no
ENSMUSG00000059674	Cdh24	cadherin-like 24 [Source:MGI Symbol;Acc:MGI:1928330]	protein_coding	3.13377	3.01742	3.27748	2.25485	1.79076	1.58835	1.67354	0.742905	0.0329963	up	no
ENSMUSG00000030322	Mbd4	methyl-CpG binding domain protein 4 [Source:MGI Symbol;Acc:MGI:1333850]	protein_coding;processed_transcript;nonsense_mediated_decay	0.632918	0.539428	0.646471	0.252344	0.434367	0.306735	1.83082	0.872487	0.0334535	up	no
ENSMUSG00000047786	Lix1	limb and CNS expressed 1 [Source:MGI Symbol;Acc:MGI:1913893]	protein_coding	1.96619	2.12933	2.17142	0.88601	1.62819	1.17458	1.69891	0.764613	0.0334638	up	no
ENSMUSG00000108414	Snhg1	small nucleolar RNA host gene 1 [Source:MGI Symbol;Acc:MGI:3763743]	lincRNA;retained_intron	9.87911	9.45503	9.62916	2.89252	7.64815	7.36987	1.61711	0.693418	0.0336598	up	no
ENSMUSG00000096001	2610528A11Rik	RIKEN cDNA 2610528A11 gene [Source:MGI Symbol;Acc:MGI:1917295]	protein_coding;processed_transcript	7.18247	9.34774	6.67938	5.16031	3.84534	4.21792	1.75517	0.81161	0.0338199	up	no
ENSMUSG00000068130	Zfp442	zinc finger protein 442 [Source:MGI Symbol;Acc:MGI:3651999]	protein_coding	0.453042	0.738393	0.639649	0.15944	0.507118	0.179561	2.1641	1.11377	0.033831	up	yes
ENSMUSG00000030346	Rad51ap1	RAD51 associated protein 1 [Source:MGI Symbol;Acc:MGI:1098224]	retained_intron;protein_coding;processed_transcript;nonsense_mediated_decay	1.39029	1.25016	1.74508	0.656551	0.939229	0.996601	1.6917	0.758472	0.0339631	up	no
ENSMUSG00000086825	Gm15675	predicted gene 15675 [Source:MGI Symbol;Acc:MGI:3783117]	lincRNA	1.2995	0.699732	0.783869	0.262926	0.664997	0.490431	1.96221	0.972476	0.0342804	up	no
ENSMUSG00000027367	Stard7	START domain containing 7 [Source:MGI Symbol;Acc:MGI:2139090]	protein_coding;retained_intron;processed_transcript	8.43174	8.80886	9.9918	3.49088	7.67223	6.67214	1.52689	0.610594	0.0344414	up	no
ENSMUSG00000023951	Vegfa	vascular endothelial growth factor A [Source:MGI Symbol;Acc:MGI:103178]	protein_coding;retained_intron	66.6686	57.3226	59.2171	25.644	50.0592	47.9904	1.48115	0.566713	0.0344907	up	no
ENSMUSG00000112022	Gm2436	predicted gene 2436 [Source:MGI Symbol;Acc:MGI:3780603]	unprocessed_pseudogene	2.6282	2.76461	2.5038	0.0001	0.516785	1.69194	3.57503	1.83796	0.0345558	up	yes
ENSMUSG00000017146	Brca1	breast cancer 1, early onset [Source:MGI Symbol;Acc:MGI:104537]	protein_coding;nonsense_mediated_decay;processed_transcript;retained_intron	1.1898	1.49318	1.7476	0.613537	0.842939	1.22089	1.65483	0.726684	0.0346293	up	no
ENSMUSG00000023915	Tnfrsf21	tumor necrosis factor receptor superfamily, member 21 [Source:MGI Symbol;Acc:MGI:2151075]	protein_coding;retained_intron	2.79223	2.4407	2.48484	1.51409	1.73777	1.56507	1.60222	0.680073	0.0347803	up	no
ENSMUSG00000033031	Cip2a	cell proliferation regulating inhibitor of protein phosphatase 2A [Source:MGI Symbol;Acc:MGI:2146335]	retained_intron;protein_coding;processed_transcript	2.68761	2.75938	3.14267	0.686664	1.85953	2.3978	1.7374	0.796926	0.0349002	up	no
ENSMUSG00000048706	Lurap1l	leucine rich adaptor protein 1-like [Source:MGI Symbol;Acc:MGI:106510]	protein_coding	15.2143	15.3053	13.701	8.65311	11.8538	9.80343	1.45893	0.544914	0.0349107	up	no
ENSMUSG00000087366	Junos	jun proto-oncogene, opposite strand [Source:MGI Symbol;Acc:MGI:2652837]	antisense	0.233243	0.308022	0.331009	0.141319	0.186172	0.1084	2.00113	1.00081	0.0351116	up	yes
ENSMUSG00000071984	Fndc1	fibronectin type III domain containing 1 [Source:MGI Symbol;Acc:MGI:1915905]	protein_coding;retained_intron;processed_transcript	52.272	51.3166	54.9825	32.8347	39.3375	39.6851	1.41762	0.50347	0.0351982	up	no
ENSMUSG00000039081	Zfp503	zinc finger protein 503 [Source:MGI Symbol;Acc:MGI:1353644]	protein_coding	8.83966	7.82314	8.02904	6.09943	5.53621	4.60816	1.52008	0.604144	0.0353829	up	no
ENSMUSG00000027522	Stx16	syntaxin 16 [Source:MGI Symbol;Acc:MGI:1923396]	protein_coding	21.6244	17.5668	20.5222	8.25004	14.1694	17.495	1.49603	0.581142	0.0355591	up	no
ENSMUSG00000071103	1700029J07Rik	RIKEN cDNA 1700029J07 gene [Source:MGI Symbol;Acc:MGI:1916729]	protein_coding	0.885103	0.826207	0.902024	0.222789	0.4926	0.637457	1.93173	0.949894	0.0358203	up	no
ENSMUSG00000020072	Pbld2	phenazine biosynthesis-like protein domain containing 2 [Source:MGI Symbol;Acc:MGI:1914557]	protein_coding;retained_intron	0.679314	0.382044	0.440831	0.137745	0.347744	0.237558	2.07758	1.0549	0.0358723	up	yes
ENSMUSG00000034343	Ube2f	ubiquitin-conjugating enzyme E2F (putative) [Source:MGI Symbol;Acc:MGI:1915171]	protein_coding;retained_intron	6.10236	6.53971	3.91376	3.02454	3.9623	3.99676	1.50732	0.591989	0.0359144	up	no
ENSMUSG00000063052	Lrrc40	leucine rich repeat containing 40 [Source:MGI Symbol;Acc:MGI:1914394]	nonsense_mediated_decay;protein_coding;retained_intron	4.76252	4.47204	5.24127	2.57615	3.58604	3.48855	1.49997	0.584934	0.0361943	up	no
ENSMUSG00000058729	Lin9	lin-9 homolog (C. elegans) [Source:MGI Symbol;Acc:MGI:1919818]	protein_coding;retained_intron;processed_transcript;nonsense_mediated_decay	1.24035	1.22657	1.2114	0.468064	0.769569	0.968362	1.66742	0.737616	0.036258	up	no
ENSMUSG00000038886	Man2a2	mannosidase 2, alpha 2 [Source:MGI Symbol;Acc:MGI:2150656]	nonsense_mediated_decay;protein_coding;retained_intron	6.41493	7.08255	6.80811	5.13568	3.93719	4.72598	1.47154	0.557329	0.0364734	up	no
ENSMUSG00000019989	Enpp3	ectonucleotide pyrophosphatase/phosphodiesterase 3 [Source:MGI Symbol;Acc:MGI:2143702]	protein_coding;processed_transcript;nonsense_mediated_decay;retained_intron	5.42951	5.22951	6.16844	2.49702	4.68363	3.99859	1.50524	0.589996	0.0366997	up	no
ENSMUSG00000032291	Crabp1	cellular retinoic acid binding protein I [Source:MGI Symbol;Acc:MGI:88490]	protein_coding	2.0052	1.08893	1.1223	0.650216	0.687564	0.720331	2.04869	1.0347	0.0370554	up	yes
ENSMUSG00000023505	Cdca3	cell division cycle associated 3 [Source:MGI Symbol;Acc:MGI:1315198]	retained_intron;protein_coding	7.89567	8.31188	6.14071	5.53678	4.02768	4.58337	1.57962	0.659582	0.0374359	up	no
ENSMUSG00000028184	Adgrl2	adhesion G protein-coupled receptor L2 [Source:MGI Symbol;Acc:MGI:2139714]	protein_coding;retained_intron	4.89269	4.50785	4.81282	2.57015	3.54584	3.84407	1.42704	0.513022	0.0376093	up	no
ENSMUSG00000025789	St8sia2	ST8 alpha-N-acetyl-neuraminide alpha-2,8-sialyltransferase 2 [Source:MGI Symbol;Acc:MGI:106020]	protein_coding	2.05263	2.23221	2.19283	1.42333	1.37592	1.26362	1.59436	0.672976	0.0377574	up	no
ENSMUSG00000041406	BC055324	cDNA sequence BC055324 [Source:MGI Symbol;Acc:MGI:3590554]	protein_coding;processed_transcript;retained_intron;nonsense_mediated_decay	2.04651	2.12785	2.00178	1.20167	1.3023	1.3119	1.61854	0.694693	0.0378041	up	no
ENSMUSG00000074971	Fibin	fin bud initiation factor homolog (zebrafish) [Source:MGI Symbol;Acc:MGI:1914856]	protein_coding	14.2574	13.9978	13.9147	6.91708	11.1928	10.4613	1.47596	0.561654	0.0378267	up	no
ENSMUSG00000071713	Csf2rb	colony stimulating factor 2 receptor, beta, low-affinity (granulocyte-macrophage) [Source:MGI Symbol;Acc:MGI:1339759]	protein_coding;retained_intron;processed_transcript	0.222501	0.239692	0.176264	0.0890059	0.0763	0.153737	2.00116	1.00084	0.037847	up	yes
ENSMUSG00000036291	Ap5m1	adaptor-related protein complex 5, mu 1 subunit [Source:MGI Symbol;Acc:MGI:1921635]	protein_coding;nonsense_mediated_decay	1.92071	1.5337	2.24769	0.664264	1.36116	1.53317	1.60235	0.680188	0.0379976	up	no
ENSMUSG00000021270	Hsp90aa1	heat shock protein 90, alpha (cytosolic), class A member 1 [Source:MGI Symbol;Acc:MGI:96250]	protein_coding;retained_intron	79.5789	95.1586	92.2067	33.478	71.2966	72.7177	1.50398	0.588781	0.0382396	up	no
ENSMUSG00000041482	Piezo2	piezo-type mechanosensitive ion channel component 2 [Source:MGI Symbol;Acc:MGI:1918781]	protein_coding;nonsense_mediated_decay;retained_intron;processed_transcript	2.74251	2.81863	3.35741	1.60246	2.17215	2.37973	1.44915	0.535206	0.0383606	up	no
ENSMUSG00000054967	Zfp647	zinc finger protein 647 [Source:MGI Symbol;Acc:MGI:3052806]	protein_coding	2.67169	2.86694	3.04542	1.54449	1.84729	1.86691	1.63235	0.706955	0.0388854	up	no
ENSMUSG00000022070	Bora	bora, aurora kinase A activator [Source:MGI Symbol;Acc:MGI:1924994]	protein_coding;nonsense_mediated_decay;retained_intron	1.83738	1.4534	1.75285	0.874213	1.07401	1.165	1.62007	0.696055	0.0389657	up	no
ENSMUSG00000082163	Gm14276	predicted gene 14276 [Source:MGI Symbol;Acc:MGI:3701955]	processed_pseudogene	2.54003	2.51384	3.23362	1.25068	1.08719	2.01776	1.9027	0.928049	0.0389714	up	no
ENSMUSG00000032561	Acpp	acid phosphatase, prostate [Source:MGI Symbol;Acc:MGI:1928480]	protein_coding;retained_intron	5.37348	6.05193	6.12405	2.31511	4.68062	4.60963	1.51219	0.596636	0.0390166	up	no
ENSMUSG00000063558	Aox1	aldehyde oxidase 1 [Source:MGI Symbol;Acc:MGI:88035]	protein_coding;retained_intron	2.31877	2.55731	2.97799	1.17437	1.86187	2.10778	1.52683	0.610541	0.0391469	up	no
ENSMUSG00000048978	Nrsn1	neurensin 1 [Source:MGI Symbol;Acc:MGI:894662]	protein_coding;processed_transcript	0.639363	0.529135	0.665979	0.431891	0.232043	0.2442	2.02005	1.01439	0.039327	up	yes
ENSMUSG00000099034	2810039B14Rik	RIKEN cDNA 2810039B14 gene [Source:MGI Symbol;Acc:MGI:1919915]	processed_transcript;retained_intron;transcribed_unitary_pseudogene	0.220215	0.261269	0.212944	0.111848	0.15001	0.0980157	1.92964	0.948333	0.0393338	up	no
ENSMUSG00000117694	Gm28285	novel protein, identical to matrin 3 (Matr3)	protein_coding;processed_transcript	0.685414	2.08861	1.86619	0.808395	0.237111	0.936203	2.34152	1.22744	0.0395595	up	yes
ENSMUSG00000021391	Cenpp	centromere protein P [Source:MGI Symbol;Acc:MGI:1913586]	protein_coding;processed_transcript	2.75656	2.49492	2.52251	1.0728	1.63855	1.94284	1.67032	0.740126	0.039599	up	no
ENSMUSG00000023953	Polh	polymerase (DNA directed), eta (RAD 30 related) [Source:MGI Symbol;Acc:MGI:1891457]	nonsense_mediated_decay;protein_coding;retained_intron	5.36573	5.81472	5.4742	2.20795	4.45764	4.33582	1.51386	0.598235	0.0396235	up	no
ENSMUSG00000024660	Incenp	inner centromere protein [Source:MGI Symbol;Acc:MGI:1313288]	retained_intron;protein_coding	9.06116	8.45356	8.62206	6.19716	5.72388	5.86662	1.46938	0.555204	0.0396296	up	no
ENSMUSG00000003198	Zfp959	zinc finger protein 959 [Source:MGI Symbol;Acc:MGI:2385058]	protein_coding;retained_intron	2.53173	2.41214	2.48192	0.150744	0.308662	2.2902	2.70067	1.43332	0.039727	up	yes
ENSMUSG00000039748	Exo1	exonuclease 1 [Source:MGI Symbol;Acc:MGI:1349427]	protein_coding;retained_intron;processed_transcript	0.584627	0.632483	0.66531	0.231289	0.464142	0.40197	1.71534	0.778498	0.0397833	up	no
ENSMUSG00000027200	Sema6d	sema domain, transmembrane domain (TM), and cytoplasmic domain, (semaphorin) 6D [Source:MGI Symbol;Acc:MGI:2387661]	protein_coding;processed_transcript;retained_intron	0.518326	0.502958	0.60359	0.238325	0.414988	0.308901	1.68868	0.755898	0.0398127	up	no
ENSMUSG00000020649	Rrm2	ribonucleotide reductase M2 [Source:MGI Symbol;Acc:MGI:98181]	protein_coding;retained_intron	59.8214	61.6786	60.4456	35.3569	48.9669	45.0843	1.40598	0.491579	0.0398417	up	no
ENSMUSG00000055320	Tead1	TEA domain family member 1 [Source:MGI Symbol;Acc:MGI:101876]	protein_coding;retained_intron;processed_transcript	2.26757	2.60823	0.534245	0.750689	0.948752	1.10771	1.92723	0.946531	0.0399183	up	no
ENSMUSG00000100720	Gm10075	predicted gene 10075 [Source:MGI Symbol;Acc:MGI:3710521]	processed_pseudogene	4.03254	3.62772	2.27539	0.191452	1.97337	1.89111	2.44966	1.29258	0.0400155	up	yes
ENSMUSG00000047686	Rtl3	retrotransposon Gag like 3 [Source:MGI Symbol;Acc:MGI:2685221]	protein_coding	0.282665	0.348171	0.308589	0.090597	0.254895	0.099464	2.11128	1.07812	0.0401506	up	yes
ENSMUSG00000019734	Tmc4	transmembrane channel-like gene family 4 [Source:MGI Symbol;Acc:MGI:2669035]	retained_intron;protein_coding	0.613081	0.485367	0.344453	0.198826	0.317116	0.23688	1.91666	0.938593	0.0401568	up	no
ENSMUSG00000020812	1810032O08Rik	RIKEN cDNA 1810032O08 gene [Source:MGI Symbol;Acc:MGI:1913543]	antisense;retained_intron	2.71319	2.45188	2.10737	0.835079	1.80277	1.61067	1.71176	0.775481	0.0401617	up	no
ENSMUSG00000056592	Zfp658	zinc finger protein 658 [Source:MGI Symbol;Acc:MGI:2652821]	protein_coding	1.6751	1.6293	1.44696	0.663372	0.915856	1.22506	1.69432	0.760706	0.0402447	up	no
ENSMUSG00000030722	Nfatc2ip	nuclear factor of activated T cells, cytoplasmic, calcineurin dependent 2 interacting protein [Source:MGI Symbol;Acc:MGI:1329015]	protein_coding	3.3451	3.00103	2.96866	1.15606	2.3907	2.15734	1.633	0.707521	0.0404741	up	no
ENSMUSG00000052485	Tmem171	transmembrane protein 171 [Source:MGI Symbol;Acc:MGI:2685751]	protein_coding	1.67405	1.34416	1.35813	0.919441	0.859568	0.460278	1.95434	0.966682	0.0406889	up	no
ENSMUSG00000034349	Smc4	structural maintenance of chromosomes 4 [Source:MGI Symbol;Acc:MGI:1917349]	protein_coding;nonsense_mediated_decay;retained_intron;processed_transcript	10.3521	13.239	15.3196	3.18993	9.95842	10.4505	1.64884	0.721451	0.0408481	up	no
ENSMUSG00000032035	Ets1	E26 avian leukemia oncogene 1, 5' domain [Source:MGI Symbol;Acc:MGI:95455]	protein_coding;retained_intron	4.57141	5.2922	4.36582	2.82036	4.19623	1.41849	1.68694	0.754405	0.0410655	up	no
ENSMUSG00000019732	Calr3	calreticulin 3 [Source:MGI Symbol;Acc:MGI:1920566]	protein_coding	0.565854	0.583789	0.336993	0.197348	0.347202	0.176584	2.06153	1.04371	0.0411899	up	yes
ENSMUSG00000015217	Hmgb3	high mobility group box 3 [Source:MGI Symbol;Acc:MGI:1098219]	protein_coding;retained_intron	19.3625	12.6453	16.3388	7.39001	14.2206	9.95776	1.53149	0.614931	0.0413928	up	no
ENSMUSG00000033964	Zbtb41	zinc finger and BTB domain containing 41 [Source:MGI Symbol;Acc:MGI:2444487]	protein_coding;nonsense_mediated_decay	3.45728	3.30509	3.80962	1.62261	3.41828	1.66245	1.57712	0.657294	0.0414785	up	no
ENSMUSG00000054545	Ugt1a6a	UDP glucuronosyltransferase 1 family, polypeptide A6A [Source:MGI Symbol;Acc:MGI:2137698]	retained_intron;protein_coding	3.95904	3.61205	2.87024	1.923	2.9157	1.69872	1.59716	0.675511	0.041486	up	no
ENSMUSG00000044244	Il20rb	interleukin 20 receptor beta [Source:MGI Symbol;Acc:MGI:2143266]	retained_intron;processed_transcript;protein_coding	0.521573	0.494364	0.527555	0.192699	0.263679	0.379913	1.84564	0.884122	0.0416941	up	no
ENSMUSG00000032258	Lca5	Leber congenital amaurosis 5 (human) [Source:MGI Symbol;Acc:MGI:1923032]	protein_coding;nonsense_mediated_decay;processed_transcript;retained_intron	0.417629	0.896213	0.472632	0.10702	0.367316	0.396808	2.05072	1.03613	0.0418636	up	yes
ENSMUSG00000025235	Bbs4	Bardet-Biedl syndrome 4 (human) [Source:MGI Symbol;Acc:MGI:2143311]	protein_coding;processed_transcript;retained_intron	4.15426	4.31901	3.84876	1.22519	3.18089	3.27319	1.60458	0.682198	0.0419151	up	no
ENSMUSG00000022364	Tbc1d31	TBC1 domain family, member 31 [Source:MGI Symbol;Acc:MGI:2684931]	retained_intron;protein_coding;processed_transcript;nonsense_mediated_decay	5.68074	5.77393	6.48154	2.43223	4.8468	4.65116	1.50343	0.588257	0.041981	up	no
ENSMUSG00000031403	Dkc1	dyskeratosis congenita 1, dyskerin [Source:MGI Symbol;Acc:MGI:1861727]	protein_coding;retained_intron;nonsense_mediated_decay;processed_transcript	7.45293	7.91305	7.37404	3.31	5.61935	6.33693	1.48956	0.574885	0.0425985	up	no
ENSMUSG00000056328	Myh1	myosin, heavy polypeptide 1, skeletal muscle, adult [Source:MGI Symbol;Acc:MGI:1339711]	protein_coding	186.748	214.908	223.9	112.533	147.882	178.163	1.42633	0.512304	0.0429315	up	no
ENSMUSG00000009376	Met	met proto-oncogene [Source:MGI Symbol;Acc:MGI:96969]	protein_coding;retained_intron	2.34471	5.08689	3.36102	1.2319	2.20306	3.06185	1.66122	0.732244	0.0433772	up	no
ENSMUSG00000059179	Gm8991	predicted pseudogene 8991 [Source:MGI Symbol;Acc:MGI:3644227]	processed_pseudogene	6.42995	16.3355	9.08876	2.65305	6.52318	8.05136	1.84902	0.886761	0.0434152	up	no
ENSMUSG00000020661	Dnmt3a	DNA methyltransferase 3A [Source:MGI Symbol;Acc:MGI:1261827]	protein_coding;retained_intron;nonsense_mediated_decay	1.13641	0.945243	1.13499	0.991842	0.297396	0.294402	2.03117	1.02231	0.0434489	up	yes
ENSMUSG00000029090	Adgra3	adhesion G protein-coupled receptor A3 [Source:MGI Symbol;Acc:MGI:1917943]	protein_coding;retained_intron;processed_transcript	11.514	11.7254	11.3728	6.97723	9.03567	8.74838	1.39783	0.483194	0.0434704	up	no
ENSMUSG00000078919	Dpm1	dolichol-phosphate (beta-D) mannosyltransferase 1 [Source:MGI Symbol;Acc:MGI:1330239]	protein_coding;retained_intron;nonsense_mediated_decay;processed_transcript	3.93961	4.0046	3.65459	1.56394	3.94938	1.47666	1.65935	0.730616	0.0440312	up	no
ENSMUSG00000023919	Cenpq	centromere protein Q [Source:MGI Symbol;Acc:MGI:1933744]	protein_coding;processed_transcript	5.83893	7.12627	6.71245	1.94671	5.23474	4.90129	1.62858	0.70361	0.044055	up	no
ENSMUSG00000041112	Elmo1	engulfment and cell motility 1 [Source:MGI Symbol;Acc:MGI:2153044]	protein_coding;retained_intron;processed_transcript	1.17626	1.32047	1.29307	0.674424	0.805488	1.0214	1.51512	0.599432	0.0441873	up	no
ENSMUSG00000026566	Mpzl1	myelin protein zero-like 1 [Source:MGI Symbol;Acc:MGI:1915731]	protein_coding;retained_intron;nonsense_mediated_decay;processed_transcript	7.41566	8.09411	7.70115	4.785	5.25499	5.91587	1.4547	0.540717	0.0443306	up	no
ENSMUSG00000022307	Oxr1	oxidation resistance 1 [Source:MGI Symbol;Acc:MGI:2179326]	protein_coding;retained_intron;nonsense_mediated_decay	12.303	13.6272	14.651	4.55818	8.91093	12.8944	1.53929	0.62227	0.0444335	up	no
ENSMUSG00000086914	Gm16124	predicted gene 16124 [Source:MGI Symbol;Acc:MGI:3802001]	antisense	1.56193	1.8604	1.89054	0.967899	1.1236	0.498533	2.05128	1.03652	0.0447918	up	yes
ENSMUSG00000084846	A730011C13Rik	RIKEN cDNA A730011C13 gene [Source:MGI Symbol;Acc:MGI:2442973]	antisense	1.77016	1.40267	1.30242	0.294959	0.82818	1.17439	1.94786	0.961887	0.0448921	up	no
ENSMUSG00000031245	Hmgn5	high-mobility group nucleosome binding domain 5 [Source:MGI Symbol;Acc:MGI:1355295]	protein_coding	4.22403	6.50059	5.21646	1.0073	4.04747	3.61307	1.83911	0.879005	0.0451254	up	no
ENSMUSG00000038214	Bend3	BEN domain containing 3 [Source:MGI Symbol;Acc:MGI:2677212]	protein_coding	1.92636	1.91091	2.02276	0.504	0.0538605	1.58538	2.73419	1.45112	0.0453018	up	yes
ENSMUSG00000073705	Cenps	centromere protein S [Source:MGI Symbol;Acc:MGI:1917178]	retained_intron;protein_coding;nonsense_mediated_decay	1.39434	1.26093	1.77648	0.755851	0.785679	0.940109	1.78581	0.836582	0.0453047	up	no
ENSMUSG00000101599	Gm20342	predicted gene, 20342 [Source:MGI Symbol;Acc:MGI:5012527]	lincRNA	0.138973	0.106283	0.147793	0.040702	0.075598	0.089473	1.91011	0.933655	0.045361	up	no
ENSMUSG00000025464	Paox	polyamine oxidase (exo-N4-amino) [Source:MGI Symbol;Acc:MGI:1916983]	protein_coding;processed_transcript;nonsense_mediated_decay	4.92629	4.30717	4.8822	3.26309	3.35907	2.829	1.49354	0.578731	0.045496	up	no
ENSMUSG00000112808	Gm4739	predicted gene 4739 [Source:MGI Symbol;Acc:MGI:3642984]	processed_pseudogene	2.78946	2.65948	2.85332	0.711705	2.31227	1.19584	1.96745	0.976329	0.0456293	up	no
ENSMUSG00000054766	Set	SET nuclear oncogene [Source:MGI Symbol;Acc:MGI:1860267]	protein_coding;processed_transcript	47.3646	47.7166	47.7005	21.5714	35.2924	42.3595	1.439	0.525062	0.0456294	up	no
ENSMUSG00000029464	Gpn3	GPN-loop GTPase 3 [Source:MGI Symbol;Acc:MGI:1289326]	nonsense_mediated_decay;protein_coding;retained_intron	10.108	8.42191	7.42739	4.67986	5.18749	7.28148	1.51365	0.598032	0.0457332	up	no
ENSMUSG00000044702	Palb2	partner and localizer of BRCA2 [Source:MGI Symbol;Acc:MGI:3040695]	protein_coding;retained_intron;nonsense_mediated_decay	0.31372	0.330925	0.407144	0.0892584	0.244313	0.225173	1.88242	0.912586	0.0461188	up	no
ENSMUSG00000096768	Gm47283	predicted gene, 47283 [Source:MGI Symbol;Acc:MGI:6096131]	protein_coding	12.4154	8.70857	6.75806	5.78095	4.82676	6.17777	1.66108	0.73212	0.0462074	up	no
ENSMUSG00000034422	Parp14	poly (ADP-ribose) polymerase family, member 14 [Source:MGI Symbol;Acc:MGI:1919489]	protein_coding;retained_intron	0.696074	0.684786	0.744671	0.208281	0.498207	0.529826	1.71925	0.781778	0.0462337	up	no
ENSMUSG00000032373	Car12	carbonic anhydrase 12 [Source:MGI Symbol;Acc:MGI:1923709]	protein_coding;retained_intron	1.86837	2.23173	2.28846	0.971431	1.62444	1.59546	1.52424	0.608086	0.0467257	up	no
ENSMUSG00000047735	Samd9l	sterile alpha motif domain containing 9-like [Source:MGI Symbol;Acc:MGI:1343184]	protein_coding	3.20018	3.54024	4.1218	0.824148	2.56036	3.02559	1.69455	0.760902	0.0470538	up	no
ENSMUSG00000036411	9530077C05Rik	RIKEN cDNA 9530077C05 gene [Source:MGI Symbol;Acc:MGI:1915533]	protein_coding;processed_transcript;retained_intron	0.569051	0.533061	0.355577	0.232675	0.232182	0.323232	1.84965	0.887252	0.0471736	up	no
ENSMUSG00000006678	Pola1	polymerase (DNA directed), alpha 1 [Source:MGI Symbol;Acc:MGI:99660]	protein_coding;processed_transcript;retained_intron	1.6008	1.77564	2.16712	0.616748	1.23538	1.59833	1.60662	0.684026	0.0471951	up	no
ENSMUSG00000022360	Atad2	ATPase family, AAA domain containing 2 [Source:MGI Symbol;Acc:MGI:1917722]	retained_intron;protein_coding	2.03679	2.13941	2.44182	0.718278	1.59836	1.93405	1.55693	0.638705	0.047231	up	no
ENSMUSG00000001517	Foxm1	forkhead box M1 [Source:MGI Symbol;Acc:MGI:1347487]	protein_coding;retained_intron;processed_transcript	1.63443	1.99483	5.62681	2.17357	0.946299	1.51877	1.99543	0.996698	0.0473817	up	no
ENSMUSG00000022974	Paxbp1	PAX3 and PAX7 binding protein 1 [Source:MGI Symbol;Acc:MGI:1914617]	protein_coding;retained_intron;nonsense_mediated_decay;processed_transcript	7.51801	8.13937	8.80986	2.6841	6.41032	6.8209	1.53734	0.620434	0.0475824	up	no
ENSMUSG00000022833	Ccdc14	coiled-coil domain containing 14 [Source:MGI Symbol;Acc:MGI:2443448]	retained_intron;protein_coding	1.03911	0.92942	1.00836	0.392901	0.77455	0.669013	1.62099	0.696877	0.0476161	up	no
ENSMUSG00000041840	Haus1	HAUS augmin-like complex, subunit 1 [Source:MGI Symbol;Acc:MGI:2385076]	protein_coding;retained_intron	2.62242	2.36796	2.57628	1.48407	1.98054	1.62978	1.48529	0.570746	0.0478627	up	no
ENSMUSG00000010097	Nxf1	nuclear RNA export factor 1 [Source:MGI Symbol;Acc:MGI:1858330]	protein_coding;retained_intron;processed_transcript;nonsense_mediated_decay	25.2157	24.4924	25.5783	10.6217	19.8666	21.4769	1.44878	0.534843	0.047932	up	no
ENSMUSG00000031756	Cenpn	centromere protein N [Source:MGI Symbol;Acc:MGI:1919405]	protein_coding;retained_intron	1.90293	2.40063	1.79286	1.12681	1.33549	1.28521	1.6268	0.702035	0.0481079	up	no
ENSMUSG00000068394	Cep152	centrosomal protein 152 [Source:MGI Symbol;Acc:MGI:2139083]	protein_coding	1.80502	1.77784	1.98362	0.679094	1.10734	1.6302	1.62923	0.70419	0.0484968	up	no
ENSMUSG00000022361	Zhx1	zinc fingers and homeoboxes 1 [Source:MGI Symbol;Acc:MGI:109271]	protein_coding;retained_intron	5.47939	5.61371	5.26008	2.91922	4.09664	4.33681	1.44047	0.52654	0.0485827	up	no
ENSMUSG00000020808	Pimreg	PICALM interacting mitotic regulator [Source:MGI Symbol;Acc:MGI:1924434]	protein_coding;processed_transcript	12.9515	11.8509	11.0475	8.78207	7.6489	7.93652	1.47122	0.557012	0.0486157	up	no
ENSMUSG00000062248	Cks2	CDC28 protein kinase regulatory subunit 2 [Source:MGI Symbol;Acc:MGI:1913447]	protein_coding	30.4952	27.1295	28.4429	13.9143	21.9179	22.0213	1.48768	0.573066	0.0489948	up	no
ENSMUSG00000028560	Usp1	ubiquitin specific peptidase 1 [Source:MGI Symbol;Acc:MGI:2385198]	protein_coding	11.0539	9.47054	11.1146	6.70404	8.00618	7.38618	1.43186	0.51789	0.0491129	up	no
ENSMUSG00000043162	Pyurf	Pigy upstream reading frame [Source:MGI Symbol;Acc:MGI:1913709]	protein_coding	3.38491	2.68055	3.94512	1.71851	2.26334	2.43356	1.5604	0.641913	0.0492208	up	no
ENSMUSG00000018372	Cep95	centrosomal protein 95 [Source:MGI Symbol;Acc:MGI:2443502]	protein_coding;processed_transcript	3.28223	3.7703	3.88791	1.18944	2.51784	3.13701	1.59848	0.676698	0.0496405	up	no
ENSMUSG00000028693	Nasp	nuclear autoantigenic sperm protein (histone-binding) [Source:MGI Symbol;Acc:MGI:1355328]	processed_transcript;protein_coding	6.0091	6.65824	6.34026	3.11501	4.83946	5.28621	1.43555	0.521599	0.0498966	up	no
ENSMUSG00000033538	Casp4	caspase 4, apoptosis-related cysteine peptidase [Source:MGI Symbol;Acc:MGI:107700]	protein_coding;retained_intron;nonsense_mediated_decay	6.81639	7.25842	7.92901	2.93344	5.87273	5.84862	1.50148	0.586381	0.0499398	up	no
ENSMUSG00000105852	Gm42890	predicted gene 42890 [Source:MGI Symbol;Acc:MGI:5663027]	retained_intron	0.794409	1.5803	0.851874	0.0400946	0.240828	0.916804	2.69393	1.42971	0.0499435	up	yes
ENSMUSG00000021728	Emb	embigin [Source:MGI Symbol;Acc:MGI:95321]	protein_coding;retained_intron;processed_transcript	3.78408	4.24019	4.53262	2.00006	3.26835	3.30075	1.46536	0.551254	0.0499915	up	no
ENSMUSG00000065529	Mir22	microRNA 22 [Source:MGI Symbol;Acc:MGI:2676896]	miRNA	0.195625	0.145038	0.108719	23.0231	30.84	36.5492	0.00497036	-7.65243	2.20497e-28	down	yes
ENSMUSG00000027519	Rab22a	RAB22A, member RAS oncogene family [Source:MGI Symbol;Acc:MGI:105072]	protein_coding;nonsense_mediated_decay	2.85504	2.79382	2.22261	11.5384	11.4113	10.8665	0.232772	-2.10301	5.61246e-21	down	yes
ENSMUSG00000079018	Ly6c1	lymphocyte antigen 6 complex, locus C1 [Source:MGI Symbol;Acc:MGI:96882]	protein_coding	10.4302	11.8272	9.42594	37.6095	39.0135	45.3308	0.259798	-1.94454	1.93526e-18	down	yes
ENSMUSG00000053877	Srcap	Snf2-related CREBBP activator protein [Source:MGI Symbol;Acc:MGI:2444036]	protein_coding;retained_intron;processed_transcript	0.271413	0.129863	0.618072	2.64939	3.22556	3.96169	0.103628	-3.27052	6.03418e-14	down	yes
ENSMUSG00000017493	Igfbp4	insulin-like growth factor binding protein 4 [Source:MGI Symbol;Acc:MGI:96439]	protein_coding;processed_transcript	12.396	11.0092	10.8959	24.6273	43.8083	37.3497	0.324251	-1.62482	6.57834e-13	down	yes
ENSMUSG00000052154	Gm9870	predicted gene 9870 [Source:MGI Symbol;Acc:MGI:3708720]	pseudogene;TEC	0.025456	0.0001	0.036044	0.457018	0.723312	0.174239	0.0454757	-4.45876	1.44671e-09	down	yes
ENSMUSG00000093752	Gm20716	predicted gene 20716 [Source:MGI Symbol;Acc:MGI:5313163]	nonsense_mediated_decay	0.0001	0.0001	0.0001	3.15105	0.0001	3.37124	4.59954e-05	-14.4082	5.5617e-09	down	yes
ENSMUSG00000030218	Mgp	matrix Gla protein [Source:MGI Symbol;Acc:MGI:96976]	protein_coding;retained_intron	119.08	114.751	112.137	323.037	237.671	263.093	0.419965	-1.25166	8.87357e-09	down	yes
ENSMUSG00000037411	Serpine1	serine (or cysteine) peptidase inhibitor, clade E, member 1 [Source:MGI Symbol;Acc:MGI:97608]	protein_coding;retained_intron	10.9755	10.6722	10.2499	17.9352	25.8466	27.5005	0.447482	-1.1601	3.12982e-08	down	yes
ENSMUSG00000026797	Stxbp1	syntaxin binding protein 1 [Source:MGI Symbol;Acc:MGI:107363]	processed_transcript;protein_coding;retained_intron	4.74178	4.80635	5.14916	14.254	10.808	10.374	0.414755	-1.26967	4.54735e-08	down	yes
ENSMUSG00000090210	Itga10	integrin, alpha 10 [Source:MGI Symbol;Acc:MGI:2153482]	protein_coding;retained_intron	5.10298	5.29423	6.5048	12.6537	11.5197	12.4774	0.461164	-1.11665	1.91845e-07	down	yes
ENSMUSG00000094439	Gm21969	predicted gene 21969 [Source:MGI Symbol;Acc:MGI:5439438]	nonsense_mediated_decay	0.095035	0.07226	0.043405	0.154538	0.816443	1.05701	0.103896	-3.26679	2.55305e-07	down	yes
ENSMUSG00000038807	Rap1gap2	RAP1 GTPase activating protein 2 [Source:MGI Symbol;Acc:MGI:3028623]	processed_transcript;nonsense_mediated_decay;protein_coding	2.88983	2.91709	3.01969	2.92666	16.381	18.6988	0.23224	-2.10631	1.75144e-06	down	yes
ENSMUSG00000032271	Nnmt	nicotinamide N-methyltransferase [Source:MGI Symbol;Acc:MGI:1099443]	processed_transcript;protein_coding;retained_intron	2.56976	2.35465	2.26116	7.4834	5.70634	5.96967	0.375041	-1.41488	3.68716e-06	down	yes
ENSMUSG00000024066	Xdh	xanthine dehydrogenase [Source:MGI Symbol;Acc:MGI:98973]	protein_coding;retained_intron;processed_transcript;nonsense_mediated_decay	1.31551	1.35929	1.57907	2.35694	3.07444	3.47249	0.477755	-1.06566	8.26298e-06	down	yes
ENSMUSG00000021277	Traf3	TNF receptor-associated factor 3 [Source:MGI Symbol;Acc:MGI:108041]	protein_coding;retained_intron	1.21049	1.29789	1.49719	5.09436	1.62443	5.85455	0.318577	-1.65029	1.05687e-05	down	yes
ENSMUSG00000108366	Gm5586	predicted gene 5586 [Source:MGI Symbol;Acc:MGI:3645853]	processed_pseudogene	51.4492	12.3368	21.7036	72.5714	158.905	68.5128	0.284976	-1.81109	2.19503e-05	down	yes
ENSMUSG00000032911	Cspg4	chondroitin sulfate proteoglycan 4 [Source:MGI Symbol;Acc:MGI:2153093]	protein_coding;retained_intron	3.66263	3.24512	3.69778	10.8855	5.44431	6.69881	0.460537	-1.11861	2.21138e-05	down	yes
ENSMUSG00000047420	Fam180a	family with sequence similarity 180, member A [Source:MGI Symbol;Acc:MGI:3039626]	protein_coding	0.672481	0.364868	0.750019	1.6522	1.6464	2.84588	0.29089	-1.78145	2.8929e-05	down	yes
ENSMUSG00000044042	Fmn1	formin 1 [Source:MGI Symbol;Acc:MGI:101815]	protein_coding;processed_transcript	0.356754	0.399611	0.894362	1.09414	1.32836	1.73051	0.397477	-1.33106	8.77528e-05	down	yes
ENSMUSG00000035441	Myo1d	myosin ID [Source:MGI Symbol;Acc:MGI:107728]	protein_coding;retained_intron	6.16912	5.27188	5.957	11.8143	9.04835	9.96364	0.564389	-0.825239	9.51459e-05	down	no
ENSMUSG00000032085	Tagln	transgelin [Source:MGI Symbol;Acc:MGI:106012]	protein_coding;retained_intron	143.439	138.304	132.611	288.579	222.55	218.614	0.567809	-0.816522	0.000105879	down	no
ENSMUSG00000053838	Nudcd3	NudC domain containing 3 [Source:MGI Symbol;Acc:MGI:2144158]	protein_coding;processed_transcript;retained_intron	6.67911	10.2985	10.4069	28.96	23.4032	10.7338	0.434006	-1.20421	0.000139418	down	yes
ENSMUSG00000018858	Mrpl58	mitochondrial ribosomal protein L58 [Source:MGI Symbol;Acc:MGI:1915822]	retained_intron;protein_coding;nonsense_mediated_decay;processed_transcript	4.00781	3.66878	3.9555	10.0163	7.00065	6.11046	0.502957	-0.991493	0.000145276	down	no
ENSMUSG00000037035	Inhbb	inhibin beta-B [Source:MGI Symbol;Acc:MGI:96571]	protein_coding	21.9927	21.4263	22.1523	48.525	34.3882	33.3281	0.564096	-0.825987	0.000167046	down	no
ENSMUSG00000038670	Mybpc2	myosin binding protein C, fast-type [Source:MGI Symbol;Acc:MGI:1336170]	protein_coding	9.41295	9.9035	9.60055	19.7171	13.8347	16.7356	0.575035	-0.798278	0.000230803	down	no
ENSMUSG00000030680	Pagr1a	PAXIP1 associated glutamate rich protein 1A [Source:MGI Symbol;Acc:MGI:1914528]	protein_coding	0.125535	0.247989	0.007227	0.917074	13.1552	0.038673	0.0269827	-5.21182	0.000276541	down	yes
ENSMUSG00000032180	Tmed1	transmembrane p24 trafficking protein 1 [Source:MGI Symbol;Acc:MGI:106201]	protein_coding;nonsense_mediated_decay;retained_intron	11.3221	10.6263	10.6002	20.6909	16.6313	19.8796	0.569014	-0.813465	0.000306753	down	no
ENSMUSG00000042190	Cmklr1	chemokine-like receptor 1 [Source:MGI Symbol;Acc:MGI:109603]	protein_coding;processed_transcript	6.95372	7.8117	8.02291	12.8594	11.9324	13.7555	0.591179	-0.758333	0.000337035	down	no
ENSMUSG00000034394	Lif	leukemia inhibitory factor [Source:MGI Symbol;Acc:MGI:96787]	protein_coding;processed_transcript	4.4786	1.0082	1.3081	4.7836	7.75237	7.2954	0.342634	-1.54526	0.000352124	down	yes
ENSMUSG00000021403	Serpinb9b	serine (or cysteine) peptidase inhibitor, clade B, member 9b [Source:MGI Symbol;Acc:MGI:894668]	protein_coding;processed_transcript	2.00676	2.12641	2.14956	2.67445	5.08253	5.04017	0.490948	-1.02636	0.000386421	down	yes
ENSMUSG00000050299	Gm9843	predicted gene 9843 [Source:MGI Symbol;Acc:MGI:3708621]	processed_pseudogene	25.6141	19.9748	19.4249	71.1061	48.1427	27.1451	0.444102	-1.17104	0.000391375	down	yes
ENSMUSG00000020681	Ace	angiotensin I converting enzyme (peptidyl-dipeptidase A) 1 [Source:MGI Symbol;Acc:MGI:87874]	protein_coding;processed_transcript	0.250085	0.163568	0.129363	0.647766	0.447135	0.421248	0.358155	-1.48134	0.000399811	down	yes
ENSMUSG00000026639	Lamb3	laminin, beta 3 [Source:MGI Symbol;Acc:MGI:99915]	protein_coding;processed_transcript;retained_intron	7.55559	7.48096	7.01125	13.1994	11.0192	11.6036	0.615477	-0.700223	0.00045691	down	no
ENSMUSG00000115188	Gm46522	predicted gene, 46522 [Source:MGI Symbol;Acc:MGI:5826159]	processed_pseudogene	4.33926	1.77448	1.3314	44.3284	2.60976	4.73892	0.14407	-2.79515	0.000471849	down	yes
ENSMUSG00000078656	Vps25	vacuolar protein sorting 25 [Source:MGI Symbol;Acc:MGI:106354]	protein_coding;retained_intron;nonsense_mediated_decay	14.842	12.4024	12.3519	25.9883	20.7855	21.634	0.57883	-0.78879	0.000493094	down	no
ENSMUSG00000026389	Steap3	STEAP family member 3 [Source:MGI Symbol;Acc:MGI:1915678]	protein_coding	6.73141	1.90969	2.15962	10.8247	7.61022	8.40161	0.402463	-1.31307	0.000592252	down	yes
ENSMUSG00000038884	A230050P20Rik	RIKEN cDNA A230050P20 gene [Source:MGI Symbol;Acc:MGI:2441788]	protein_coding;retained_intron;processed_transcript	6.79709	5.26313	5.71186	8.55418	11.8567	9.77335	0.588788	-0.76418	0.000608069	down	no
ENSMUSG00000067724	Gbx1	gastrulation brain homeobox 1 [Source:MGI Symbol;Acc:MGI:95667]	protein_coding	0.141061	0.151161	0.115297	0.243995	0.416466	0.464483	0.362257	-1.46491	0.00066049	down	yes
ENSMUSG00000022475	Hdac7	histone deacetylase 7 [Source:MGI Symbol;Acc:MGI:1891835]	retained_intron;protein_coding;nonsense_mediated_decay	6.4667	5.73808	5.56738	9.48185	9.29847	9.31288	0.632614	-0.660601	0.000683802	down	no
ENSMUSG00000017607	Tns4	tensin 4 [Source:MGI Symbol;Acc:MGI:2144377]	protein_coding;processed_transcript;retained_intron	0.0954018	0.0954584	0.106245	0.181888	0.241957	0.43633	0.3454	-1.53366	0.00070903	down	yes
ENSMUSG00000042870	Tom1	target of myb1 trafficking protein [Source:MGI Symbol;Acc:MGI:1338026]	protein_coding;nonsense_mediated_decay;processed_transcript	16.1048	13.4392	15.1294	28.9896	20.6291	24.3522	0.603933	-0.727539	0.000740614	down	no
ENSMUSG00000026880	Stom	stomatin [Source:MGI Symbol;Acc:MGI:95403]	protein_coding;retained_intron	61.2012	62.2874	61.2374	124.656	91.6969	87.0848	0.608778	-0.716013	0.000753808	down	no
ENSMUSG00000028738	Tas1r2	taste receptor, type 1, member 2 [Source:MGI Symbol;Acc:MGI:1933546]	protein_coding	0.126586	0.192217	0.152102	0.690722	0.325775	0.356961	0.342861	-1.5443	0.0009624	down	yes
ENSMUSG00000028862	Map3k6	mitogen-activated protein kinase kinase kinase 6 [Source:MGI Symbol;Acc:MGI:1855691]	protein_coding;processed_transcript	1.0001	0.94247	0.852412	2.11609	1.53569	1.89339	0.50404	-0.98839	0.00108599	down	no
ENSMUSG00000037185	Krt80	keratin 80 [Source:MGI Symbol;Acc:MGI:1921377]	retained_intron;protein_coding;processed_transcript	6.71127	6.59171	6.5232	15.5837	9.07948	9.50877	0.580189	-0.785406	0.00111189	down	no
ENSMUSG00000021367	Edn1	endothelin 1 [Source:MGI Symbol;Acc:MGI:95283]	protein_coding	0.695623	1.1292	1.1252	1.53316	2.34083	2.83756	0.439543	-1.18592	0.00116728	down	yes
ENSMUSG00000049097	Ankrd34a	ankyrin repeat domain 34A [Source:MGI Symbol;Acc:MGI:3617846]	protein_coding	0.403998	0.237614	0.271229	0.896395	0.662355	0.718975	0.400769	-1.31916	0.00119209	down	yes
ENSMUSG00000011096	Akt1s1	AKT1 substrate 1 (proline-rich) [Source:MGI Symbol;Acc:MGI:1914855]	protein_coding;retained_intron	9.92421	13.9892	8.50721	25.5029	16.2053	16.1684	0.560169	-0.836067	0.00121087	down	no
ENSMUSG00000040152	Thbs1	thrombospondin 1 [Source:MGI Symbol;Acc:MGI:98737]	protein_coding;retained_intron	438.441	495.829	502.25	495.914	918.95	1019.12	0.590193	-0.760741	0.00122931	down	no
ENSMUSG00000012889	Podnl1	podocan-like 1 [Source:MGI Symbol;Acc:MGI:2685352]	protein_coding;retained_intron	8.85703	8.72797	7.61102	17.0352	12.5741	12.0729	0.604478	-0.726237	0.00124251	down	no
ENSMUSG00000040907	Atp1a3	ATPase, Na+/K+ transporting, alpha 3 polypeptide [Source:MGI Symbol;Acc:MGI:88107]	protein_coding;retained_intron	6.68143	6.96411	7.04203	20.9153	9.85847	8.90429	0.521385	-0.939579	0.00137652	down	no
ENSMUSG00000059714	Flot1	flotillin 1 [Source:MGI Symbol;Acc:MGI:1100500]	nonsense_mediated_decay;protein_coding;retained_intron	20.139	15.8705	16.7277	36.4159	26.3365	23.7503	0.609659	-0.713926	0.00143791	down	no
ENSMUSG00000059430	Actg2	actin, gamma 2, smooth muscle, enteric [Source:MGI Symbol;Acc:MGI:104589]	protein_coding;processed_transcript	37.0219	27.9629	32.1804	82.535	43.4225	46.0857	0.564772	-0.82426	0.00150728	down	no
ENSMUSG00000019124	Scrn1	secernin 1 [Source:MGI Symbol;Acc:MGI:1917188]	protein_coding;retained_intron;processed_transcript	7.89538	8.46445	8.44958	12.419	11.9764	12.8675	0.665794	-0.586853	0.00158021	down	no
ENSMUSG00000082884	Gm13339	predicted gene 13339 [Source:MGI Symbol;Acc:MGI:3650221]	unprocessed_pseudogene	2.01954	2.76075	2.21155	8.60176	8.68885	2.45553	0.354086	-1.49783	0.00158795	down	yes
ENSMUSG00000042331	Specc1	sperm antigen with calponin homology and coiled-coil domains 1 [Source:MGI Symbol;Acc:MGI:2442356]	protein_coding;retained_intron;processed_transcript	3.86586	2.84177	4.10699	5.61788	5.3642	5.8599	0.642123	-0.639078	0.00166016	down	no
ENSMUSG00000037098	Rab11fip3	RAB11 family interacting protein 3 (class II) [Source:MGI Symbol;Acc:MGI:2444431]	protein_coding;processed_transcript;retained_intron	3.9005	7.59542	4.06252	10.4378	8.56382	8.33918	0.569055	-0.81336	0.00178874	down	no
ENSMUSG00000047747	Rnf150	ring finger protein 150 [Source:MGI Symbol;Acc:MGI:2443860]	protein_coding;processed_transcript	4.43912	4.62509	4.89827	5.3372	7.64802	8.56734	0.647834	-0.626305	0.0017978	down	no
ENSMUSG00000017774	Myo1c	myosin IC [Source:MGI Symbol;Acc:MGI:106612]	protein_coding;retained_intron	52.1369	51.3305	53.3404	102.841	70.7487	75.2389	0.630183	-0.666156	0.00188231	down	no
ENSMUSG00000063727	Tnfrsf11b	tumor necrosis factor receptor superfamily, member 11b (osteoprotegerin) [Source:MGI Symbol;Acc:MGI:109587]	protein_coding	1.44032	1.57319	1.29664	1.87281	3.3527	3.28481	0.506463	-0.981472	0.00201071	down	no
ENSMUSG00000024083	Pja2	praja ring finger ubiquitin ligase 2 [Source:MGI Symbol;Acc:MGI:2159342]	protein_coding;retained_intron	11.9041	14.247	14.495	13.5553	26.2656	27.5156	0.603627	-0.72827	0.00208346	down	no
ENSMUSG00000027254	Map1a	microtubule-associated protein 1 A [Source:MGI Symbol;Acc:MGI:1306776]	protein_coding;processed_transcript	6.75985	6.42399	6.71617	14.9725	8.68909	9.0988	0.60744	-0.719185	0.00223542	down	no
ENSMUSG00000028613	Lrp8	low density lipoprotein receptor-related protein 8, apolipoprotein e receptor [Source:MGI Symbol;Acc:MGI:1340044]	protein_coding;nonsense_mediated_decay;processed_transcript;retained_intron	0.0843883	0.131887	0.276119	0.268185	0.446345	0.556504	0.387396	-1.36812	0.00223979	down	yes
ENSMUSG00000068699	Flnc	filamin C, gamma [Source:MGI Symbol;Acc:MGI:95557]	protein_coding;retained_intron	50.3698	52.6923	57.082	120.592	69.1379	75.3336	0.604174	-0.726965	0.00234034	down	no
ENSMUSG00000026380	Tfcp2l1	transcription factor CP2-like 1 [Source:MGI Symbol;Acc:MGI:2444691]	protein_coding;processed_transcript	0.0770639	0.0916058	0.0394428	0.182424	0.146514	0.19243	0.399166	-1.32494	0.00234148	down	yes
ENSMUSG00000032420	Nt5e	5' nucleotidase, ecto [Source:MGI Symbol;Acc:MGI:99782]	protein_coding;processed_transcript;retained_intron	1.39834	1.80198	1.88486	1.6748	4.00356	3.65516	0.54483	-0.876123	0.00237135	down	no
ENSMUSG00000082530	Gm12168	predicted gene 12168 [Source:MGI Symbol;Acc:MGI:3650839]	processed_pseudogene	1.33318	2.07319	1.8068	5.06029	3.31207	4.08455	0.418496	-1.25672	0.00258845	down	yes
ENSMUSG00000045545	Krt14	keratin 14 [Source:MGI Symbol;Acc:MGI:96688]	protein_coding;processed_transcript	0.931931	1.28156	1.52124	3.10258	2.37576	2.25932	0.482669	-1.05089	0.00262802	down	yes
ENSMUSG00000038965	Ube2l3	ubiquitin-conjugating enzyme E2L 3 [Source:MGI Symbol;Acc:MGI:109240]	protein_coding;nonsense_mediated_decay;processed_transcript	12.5395	12.5789	6.12145	21.8606	21.0381	12.9898	0.558968	-0.839163	0.0026523	down	no
ENSMUSG00000026279	Thap4	THAP domain containing 4 [Source:MGI Symbol;Acc:MGI:1914276]	protein_coding;nonsense_mediated_decay;retained_intron	2.65172	1.9375	2.07748	6.70659	2.18609	4.4615	0.499222	-1.00225	0.0026958	down	yes
ENSMUSG00000078901	Gm14440	predicted gene 14440 [Source:MGI Symbol;Acc:MGI:3702430]	protein_coding	0.0001	0.199327	0.07169	0.271386	0.454187	0.710322	0.188814	-2.40496	0.00273329	down	yes
ENSMUSG00000021950	Anxa8	annexin A8 [Source:MGI Symbol;Acc:MGI:1201374]	protein_coding	289.04	297.74	296.951	463.612	420.756	422.876	0.676026	-0.564849	0.00277842	down	no
ENSMUSG00000021903	Galnt15	polypeptide N-acetylgalactosaminyltransferase 15 [Source:MGI Symbol;Acc:MGI:1926004]	protein_coding	0.128007	0.122677	0.208116	0.357217	0.372901	0.308792	0.441617	-1.17913	0.00278314	down	yes
ENSMUSG00000059810	Rgs3	regulator of G-protein signaling 3 [Source:MGI Symbol;Acc:MGI:1354734]	processed_transcript;protein_coding;retained_intron	2.71321	2.43132	2.64542	4.51137	3.9152	3.60919	0.647234	-0.627641	0.00297811	down	no
ENSMUSG00000029406	Pitpnm2	phosphatidylinositol transfer protein, membrane-associated 2 [Source:MGI Symbol;Acc:MGI:1336192]	protein_coding;retained_intron	1.00413	1.20768	0.902353	2.85185	1.74416	1.20349	0.536971	-0.897083	0.00315656	down	no
ENSMUSG00000034165	Ccnd3	cyclin D3 [Source:MGI Symbol;Acc:MGI:88315]	protein_coding;retained_intron	11.8953	8.8689	7.41862	23.0694	26.6507	7.47602	0.492741	-1.0211	0.00330797	down	yes
ENSMUSG00000034957	Cebpa	CCAAT/enhancer binding protein (C/EBP), alpha [Source:MGI Symbol;Acc:MGI:99480]	protein_coding	5.06453	4.74772	4.27235	8.83673	6.9797	7.0483	0.615997	-0.699006	0.00346193	down	no
ENSMUSG00000100782	Gm28231	predicted gene 28231 [Source:MGI Symbol;Acc:MGI:5578937]	lincRNA	0.228561	0.421178	0.402746	0.832016	0.74265	0.78318	0.446376	-1.16367	0.00348061	down	yes
ENSMUSG00000039852	Rere	arginine glutamic acid dipeptide (RE) repeats [Source:MGI Symbol;Acc:MGI:2683486]	protein_coding;processed_transcript	3.33821	3.55688	3.86799	9.1575	4.61314	4.76288	0.580736	-0.784046	0.00366158	down	no
ENSMUSG00000031443	F7	coagulation factor VII [Source:MGI Symbol;Acc:MGI:109325]	protein_coding	0.761979	0.518406	0.567195	1.24971	1.25471	1.39204	0.474168	-1.07653	0.00371735	down	yes
ENSMUSG00000036854	Hspb6	heat shock protein, alpha-crystallin-related, B6 [Source:MGI Symbol;Acc:MGI:2685325]	protein_coding;processed_transcript	5.65992	4.26897	3.85925	9.38429	6.73864	7.16494	0.592074	-0.756151	0.00372825	down	no
ENSMUSG00000062328	Rpl17	ribosomal protein L17 [Source:MGI Symbol;Acc:MGI:2448270]	protein_coding	132.303	117.924	148.908	145.074	215.385	249.712	0.654137	-0.612334	0.00373175	down	no
ENSMUSG00000076441	Ass1	argininosuccinate synthetase 1 [Source:MGI Symbol;Acc:MGI:88090]	protein_coding;retained_intron	15.9254	14.6213	12.4979	36.0805	19.2411	18.217	0.585333	-0.772669	0.00380968	down	no
ENSMUSG00000000594	Gm2a	GM2 ganglioside activator protein [Source:MGI Symbol;Acc:MGI:95762]	protein_coding	5.16162	4.70215	4.76668	8.26844	7.15915	7.0641	0.650483	-0.620417	0.00381295	down	no
ENSMUSG00000009545	Kcnq1	potassium voltage-gated channel, subfamily Q, member 1 [Source:MGI Symbol;Acc:MGI:108083]	protein_coding	0.131826	0.190165	0.22298	0.440316	0.384182	0.390303	0.44861	-1.15647	0.0038163	down	yes
ENSMUSG00000028763	Hspg2	perlecan (heparan sulfate proteoglycan 2) [Source:MGI Symbol;Acc:MGI:96257]	protein_coding;processed_transcript	48.6343	44.6823	51.5604	116.033	60.0665	64.8231	0.601341	-0.733744	0.00394042	down	no
ENSMUSG00000051339	2900026A02Rik	RIKEN cDNA 2900026A02 gene [Source:MGI Symbol;Acc:MGI:1920194]	protein_coding	3.87093	3.48427	3.61323	6.93756	5.08133	4.80619	0.651909	-0.617258	0.00400944	down	no
ENSMUSG00000060459	Kng2	kininogen 2 [Source:MGI Symbol;Acc:MGI:3027157]	protein_coding;nonsense_mediated_decay	2.52897	2.3915	2.24587	3.90887	4.0902	4.06421	0.594063	-0.751313	0.00401513	down	no
ENSMUSG00000012296	Tjap1	tight junction associated protein 1 [Source:MGI Symbol;Acc:MGI:1921344]	protein_coding;retained_intron;processed_transcript	5.5668	5.08324	8.60685	10.2159	11.0633	9.33473	0.629022	-0.668817	0.00418141	down	no
ENSMUSG00000038437	Mllt6	myeloid/lymphoid or mixed-lineage leukemia; translocated to, 6 [Source:MGI Symbol;Acc:MGI:1935145]	protein_coding;processed_transcript	3.43581	3.22051	3.54961	5.56973	3.85365	6.88998	0.625618	-0.676647	0.00425612	down	no
ENSMUSG00000027488	Snta1	syntrophin, acidic 1 [Source:MGI Symbol;Acc:MGI:101772]	protein_coding;processed_transcript	12.185	12.0147	10.5962	26.5694	14.527	15.7504	0.612099	-0.708162	0.00430246	down	no
ENSMUSG00000082901	Gm14323	predicted gene 14323 [Source:MGI Symbol;Acc:MGI:3650742]	processed_pseudogene	6.86604	6.99604	5.52816	15.2834	12.4922	8.84447	0.529497	-0.917305	0.00433808	down	no
ENSMUSG00000047821	Trim16	tripartite motif-containing 16 [Source:MGI Symbol;Acc:MGI:2137356]	protein_coding;processed_transcript	3.41154	2.93039	3.26262	3.79275	5.52737	5.99994	0.626926	-0.673632	0.00433859	down	no
ENSMUSG00000112963	Gm6093	predicted gene 6093 [Source:MGI Symbol;Acc:MGI:3648840]	lincRNA	0.361556	0.478895	0.729041	0.703884	1.12712	1.70035	0.444445	-1.16992	0.00455897	down	yes
ENSMUSG00000097397	Gm16861	predicted gene, 16861 [Source:MGI Symbol;Acc:MGI:4439785]	antisense	0.347448	0.391972	0.266515	0.728321	0.703176	0.786568	0.453519	-1.14076	0.00459536	down	yes
ENSMUSG00000034947	Tmem106a	transmembrane protein 106A [Source:MGI Symbol;Acc:MGI:1922056]	protein_coding;processed_transcript	0.330914	0.555913	0.413848	1.26877	0.732749	0.841895	0.457435	-1.12836	0.00465003	down	yes
ENSMUSG00000031983	2310022B05Rik	RIKEN cDNA 2310022B05 gene [Source:MGI Symbol;Acc:MGI:1916801]	protein_coding	42.9028	38.8624	38.8347	86.1416	50.868	52.8601	0.635172	-0.65478	0.00479194	down	no
ENSMUSG00000033209	Ttc28	tetratricopeptide repeat domain 28 [Source:MGI Symbol;Acc:MGI:2140873]	protein_coding;retained_intron;processed_transcript	1.51842	1.39811	3.416	7.10251	3.90983	2.34936	0.473932	-1.07725	0.00481244	down	yes
ENSMUSG00000021360	Gcnt2	glucosaminyl (N-acetyl) transferase 2, I-branching enzyme [Source:MGI Symbol;Acc:MGI:1100870]	protein_coding;retained_intron	1.25399	1.69799	1.64585	1.69071	4.7585	2.25894	0.527991	-0.921415	0.00496907	down	no
ENSMUSG00000022584	Ly6c2	lymphocyte antigen 6 complex, locus C2 [Source:MGI Symbol;Acc:MGI:3712069]	protein_coding;retained_intron	5.33242	5.37005	6.08053	9.65105	9.24144	7.36158	0.639253	-0.645541	0.00501678	down	no
ENSMUSG00000015766	Eps8	epidermal growth factor receptor pathway substrate 8 [Source:MGI Symbol;Acc:MGI:104684]	protein_coding;processed_transcript;retained_intron	3.74005	4.07432	4.00848	4.51411	6.38346	6.44724	0.681636	-0.552926	0.00503769	down	no
ENSMUSG00000023336	Wfdc1	WAP four-disulfide core domain 1 [Source:MGI Symbol;Acc:MGI:1915116]	protein_coding	1.43584	0.951678	1.37144	3.04385	2.40636	2.03025	0.502503	-0.992797	0.00521676	down	no
ENSMUSG00000021675	F2rl2	coagulation factor II (thrombin) receptor-like 2 [Source:MGI Symbol;Acc:MGI:1298208]	protein_coding	0.303999	0.327572	0.414388	0.485348	0.925868	0.872722	0.457963	-1.1267	0.00543938	down	yes
ENSMUSG00000016757	Ttll12	tubulin tyrosine ligase-like family, member 12 [Source:MGI Symbol;Acc:MGI:3039573]	protein_coding;nonsense_mediated_decay;retained_intron	8.9447	9.41918	15.7592	24.3928	15.237	16.5153	0.607766	-0.718412	0.00585548	down	no
ENSMUSG00000000489	Pdgfb	platelet derived growth factor, B polypeptide [Source:MGI Symbol;Acc:MGI:97528]	protein_coding;retained_intron	3.02315	2.46874	2.52582	4.06794	3.98166	4.46396	0.640722	-0.64223	0.00591269	down	no
ENSMUSG00000057230	Aak1	AP2 associated kinase 1 [Source:MGI Symbol;Acc:MGI:1098687]	protein_coding;processed_transcript;retained_intron	0.194917	0.260326	0.302704	0.253139	0.965165	0.422262	0.462003	-1.11402	0.00601016	down	yes
ENSMUSG00000112099	Gm8960	predicted gene 8960 [Source:MGI Symbol;Acc:MGI:3642929]	processed_pseudogene	0.944257	0.787662	0.854674	2.04682	2.03534	1.41242	0.470753	-1.08696	0.00623364	down	yes
ENSMUSG00000034902	Pip5k1c	phosphatidylinositol-4-phosphate 5-kinase, type 1 gamma [Source:MGI Symbol;Acc:MGI:1298224]	protein_coding;nonsense_mediated_decay;retained_intron	2.90522	5.63943	6.94936	13.4454	7.61409	7.12806	0.549675	-0.863348	0.00630738	down	no
ENSMUSG00000034220	Gpc1	glypican 1 [Source:MGI Symbol;Acc:MGI:1194891]	protein_coding;retained_intron;processed_transcript	169.035	147.137	151.547	335.881	196.163	199.493	0.639366	-0.645285	0.00646245	down	no
ENSMUSG00000036278	Macrod1	MACRO domain containing 1 [Source:MGI Symbol;Acc:MGI:2147583]	protein_coding	14.976	11.3612	12.3287	34.2637	17.9469	15.347	0.572338	-0.805061	0.00660725	down	no
ENSMUSG00000093593	Gm20683	predicted gene 20683 [Source:MGI Symbol;Acc:MGI:5313130]	nonsense_mediated_decay	0.68532	0.275746	0.66955	0.755454	1.79745	1.20198	0.434265	-1.20335	0.00663711	down	yes
ENSMUSG00000090145	Ugt1a6b	UDP glucuronosyltransferase 1 family, polypeptide A6B [Source:MGI Symbol;Acc:MGI:3580629]	protein_coding	0.555334	1.36922	0.236424	1.24812	1.40914	3.55286	0.347977	-1.52294	0.00669764	down	yes
ENSMUSG00000028751	Pla2g2e	phospholipase A2, group IIE [Source:MGI Symbol;Acc:MGI:1349660]	protein_coding	1.2503	1.64163	2.09865	2.84101	3.13659	4.08023	0.496189	-1.01104	0.00674172	down	yes
ENSMUSG00000074676	Foxs1	forkhead box S1 [Source:MGI Symbol;Acc:MGI:95546]	protein_coding	6.32903	6.32771	6.92123	12.8104	8.64305	10.5532	0.611685	-0.709138	0.00683647	down	no
ENSMUSG00000111521	Gm48529	predicted gene, 48529 [Source:MGI Symbol;Acc:MGI:6098068]	antisense	6.26359	6.40073	6.66868	9.11832	9.3413	10.455	0.668624	-0.580733	0.00683776	down	no
ENSMUSG00000062563	Cys1	cystin 1 [Source:MGI Symbol;Acc:MGI:2177632]	protein_coding;nonsense_mediated_decay;processed_transcript	0.326191	0.589881	0.259645	0.656479	1.00154	0.908854	0.458035	-1.12647	0.00690977	down	yes
ENSMUSG00000032193	Ldlr	low density lipoprotein receptor [Source:MGI Symbol;Acc:MGI:96765]	retained_intron;protein_coding	14.3293	14.3573	13.4262	19.8241	19.0041	20.1226	0.714373	-0.48525	0.00693423	down	no
ENSMUSG00000019590	Cyb561	cytochrome b-561 [Source:MGI Symbol;Acc:MGI:103253]	protein_coding;processed_transcript	0.0755925	0.0962439	0.10775	0.145121	0.263457	0.256201	0.42057	-1.24958	0.00698766	down	yes
ENSMUSG00000054517	Trim65	tripartite motif-containing 65 [Source:MGI Symbol;Acc:MGI:2442815]	protein_coding;processed_transcript	0.32623	0.375507	0.391889	0.659333	0.754963	0.593786	0.544612	-0.8767	0.00713191	down	no
ENSMUSG00000021806	Nid2	nidogen 2 [Source:MGI Symbol;Acc:MGI:1298229]	protein_coding;retained_intron	62.4562	62.165	55.4021	77.8563	85.6907	88.6535	0.713811	-0.486387	0.00730584	down	no
ENSMUSG00000055322	Tns1	tensin 1 [Source:MGI Symbol;Acc:MGI:104552]	protein_coding;processed_transcript;retained_intron	14.8522	11.9852	14.9983	32.2815	24.0236	13.1608	0.602249	-0.731569	0.00738258	down	no
ENSMUSG00000059743	Fdps	farnesyl diphosphate synthetase [Source:MGI Symbol;Acc:MGI:104888]	protein_coding;retained_intron	23.4817	25.9404	24.4137	40.6573	32.1243	33.1196	0.697214	-0.520326	0.00741717	down	no
ENSMUSG00000025855	Prkar1b	protein kinase, cAMP dependent regulatory, type I beta [Source:MGI Symbol;Acc:MGI:97759]	protein_coding;processed_transcript	0.107743	0.0754403	0.230513	0.40283	0.247911	0.347523	0.414415	-1.27085	0.00795603	down	yes
ENSMUSG00000106715	Tmem265	transmembrane protein 265 [Source:MGI Symbol;Acc:MGI:5613213]	protein_coding	0.556001	0.255816	0.166431	1.35199	0.506533	0.761273	0.373407	-1.42118	0.00797628	down	yes
ENSMUSG00000064372	mt-Tp	mitochondrially encoded tRNA proline [Source:MGI Symbol;Acc:MGI:102478]	Mt_tRNA	69.9959	97.0901	79.9979	305.954	149.904	72.1705	0.467937	-1.09561	0.00810845	down	yes
ENSMUSG00000028600	Podn	podocan [Source:MGI Symbol;Acc:MGI:2674939]	processed_transcript;protein_coding	0.122689	0.128699	0.207867	0.463077	0.244293	0.320258	0.446907	-1.16195	0.00818332	down	yes
ENSMUSG00000031613	Hpgd	hydroxyprostaglandin dehydrogenase 15 (NAD) [Source:MGI Symbol;Acc:MGI:108085]	protein_coding	0.392121	0.515814	0.385765	0.566624	1.01777	1.23594	0.458705	-1.12436	0.00822928	down	yes
ENSMUSG00000082193	Rpl5-ps1	ribosomal protein L5, pseudogene 1 [Source:MGI Symbol;Acc:MGI:3647110]	processed_pseudogene	2.76172	1.01939	4.43887	4.10918	4.03628	14.1397	0.368855	-1.43887	0.00837168	down	yes
ENSMUSG00000044017	Adgrd1	adhesion G protein-coupled receptor D1 [Source:MGI Symbol;Acc:MGI:3041203]	protein_coding;retained_intron	0.422208	0.687488	0.449983	1.00442	0.802763	0.960112	0.563611	-0.82723	0.0084756	down	no
ENSMUSG00000029859	Epha1	Eph receptor A1 [Source:MGI Symbol;Acc:MGI:107381]	protein_coding;retained_intron	3.36408	3.9063	3.58532	4.97801	5.07054	6.36099	0.661548	-0.596082	0.0085219	down	no
ENSMUSG00000037966	Ninj1	ninjurin 1 [Source:MGI Symbol;Acc:MGI:1196617]	nonsense_mediated_decay;protein_coding;processed_transcript	7.14991	6.68936	11.0515	21.1108	9.98228	12.438	0.571792	-0.806438	0.0087284	down	no
ENSMUSG00000022817	Itgb5	integrin beta 5 [Source:MGI Symbol;Acc:MGI:96614]	protein_coding;processed_transcript	87.1001	81.7325	79.3272	138.555	103.688	112.675	0.699202	-0.51622	0.00884477	down	no
ENSMUSG00000063235	Ptpmt1	protein tyrosine phosphatase, mitochondrial 1 [Source:MGI Symbol;Acc:MGI:1913711]	processed_transcript	5.24339	5.46473	7.80992	10.0961	9.56181	8.39089	0.660208	-0.599008	0.00902395	down	no
ENSMUSG00000032860	P2ry2	purinergic receptor P2Y, G-protein coupled 2 [Source:MGI Symbol;Acc:MGI:105107]	protein_coding;retained_intron	3.96947	1.60784	2.84569	6.37707	4.29603	4.18139	0.567034	-0.818492	0.00904789	down	no
ENSMUSG00000050335	Lgals3	lectin, galactose binding, soluble 3 [Source:MGI Symbol;Acc:MGI:96778]	protein_coding	146.346	153.112	131.612	270.381	181.718	182.882	0.67887	-0.558794	0.00924636	down	no
ENSMUSG00000019997	Ccn2	cellular communication network factor 1 [Source:MGI Symbol;Acc:MGI:95537]	protein_coding	32.9029	34.8263	31.2553	49.2146	43.574	44.9894	0.718435	-0.477071	0.00925194	down	no
ENSMUSG00000028542	Slc6a9	solute carrier family 6 (neurotransmitter transporter, glycine), member 9 [Source:MGI Symbol;Acc:MGI:95760]	protein_coding;nonsense_mediated_decay;processed_transcript;retained_intron	5.65914	5.08875	4.86356	9.392	7.0301	6.79563	0.672394	-0.572622	0.00933045	down	no
ENSMUSG00000080772	Gm12543	predicted gene 12543 [Source:MGI Symbol;Acc:MGI:3649591]	transcribed_processed_pseudogene	6.10138	1.3741	0.720555	6.5088	9.02246	8.07816	0.347151	-1.52636	0.00936593	down	yes
ENSMUSG00000040714	Klc3	kinesin light chain 3 [Source:MGI Symbol;Acc:MGI:1277971]	protein_coding;retained_intron	0.451313	0.600604	0.613359	1.73072	0.727698	1.01219	0.479822	-1.05943	0.00981661	down	yes
ENSMUSG00000052911	Lamb2	laminin, beta 2 [Source:MGI Symbol;Acc:MGI:99916]	protein_coding;retained_intron	20.8431	19.7531	20.041	34.5848	25.7653	26.0732	0.701631	-0.511216	0.00997043	down	no
ENSMUSG00000023046	Igfbp6	insulin-like growth factor binding protein 6 [Source:MGI Symbol;Acc:MGI:96441]	protein_coding	92.8823	85.1491	81.9277	179.294	108.055	104.989	0.662589	-0.593814	0.0100363	down	no
ENSMUSG00000029648	Flt1	FMS-like tyrosine kinase 1 [Source:MGI Symbol;Acc:MGI:95558]	protein_coding;processed_transcript;retained_intron	0.04395	0.0590875	0.0405525	0.0607448	0.116392	0.137529	0.456325	-1.13187	0.0100981	down	yes
ENSMUSG00000108506	Gm44705	predicted gene 44705 [Source:MGI Symbol;Acc:MGI:5753281]	processed_pseudogene	5.27941	6.89539	4.83456	14.588	16.3422	5.22408	0.470465	-1.08784	0.0101626	down	yes
ENSMUSG00000045216	Hs6st1	heparan sulfate 6-O-sulfotransferase 1 [Source:MGI Symbol;Acc:MGI:1354958]	protein_coding;retained_intron	15.4065	12.982	12.8872	25.1205	17.2935	17.6522	0.68717	-0.541262	0.0102263	down	no
ENSMUSG00000049562	Ap5b1	adaptor-related protein complex 5, beta 1 subunit [Source:MGI Symbol;Acc:MGI:2685808]	protein_coding	0.345103	0.670335	0.863489	1.76095	0.94952	1.15125	0.486552	-1.03933	0.0102533	down	yes
ENSMUSG00000056770	Setd3	SET domain containing 3 [Source:MGI Symbol;Acc:MGI:1289184]	retained_intron;protein_coding;nonsense_mediated_decay;processed_transcript	11.0439	11.2046	11.5337	11.3767	19.7197	17.6562	0.692929	-0.52922	0.0104648	down	no
ENSMUSG00000017390	Aldoc	aldolase C, fructose-bisphosphate [Source:MGI Symbol;Acc:MGI:101863]	protein_coding;retained_intron;processed_transcript	0.374103	0.441551	0.350952	0.809569	0.678362	0.735932	0.524585	-0.93075	0.0104965	down	no
ENSMUSG00000034839	Larp6	La ribonucleoprotein domain family, member 6 [Source:MGI Symbol;Acc:MGI:1914807]	protein_coding	1.28832	1.4333	1.21446	2.43569	1.97215	2.33602	0.583655	-0.776813	0.0106883	down	no
ENSMUSG00000024529	Lox	lysyl oxidase [Source:MGI Symbol;Acc:MGI:96817]	protein_coding	58.8393	63.702	160.959	196.671	248.897	96.4801	0.523017	-0.935072	0.0108331	down	no
ENSMUSG00000022044	Stmn4	stathmin-like 4 [Source:MGI Symbol;Acc:MGI:1931224]	protein_coding;retained_intron;processed_transcript	1.70706	2.18572	2.07309	2.46091	3.86094	4.04582	0.57543	-0.797289	0.0108358	down	no
ENSMUSG00000090083	Rnf8	ring finger protein 8 [Source:MGI Symbol;Acc:MGI:1929069]	protein_coding;retained_intron;nonsense_mediated_decay;processed_transcript	1.31215	1.16467	1.0201	1.54582	1.92694	1.74309	0.67044	-0.576819	0.0112582	down	no
ENSMUSG00000025572	Tmc6	transmembrane channel-like gene family 6 [Source:MGI Symbol;Acc:MGI:1098686]	retained_intron;protein_coding;nonsense_mediated_decay	5.49743	4.54627	4.81406	10.5208	6.20076	6.32495	0.644686	-0.633333	0.0116501	down	no
ENSMUSG00000025020	Slit1	slit guidance ligand 1 [Source:MGI Symbol;Acc:MGI:1315203]	protein_coding;retained_intron	0.0377478	0.06381	0.0825713	0.152635	0.157919	0.104083	0.444073	-1.17113	0.011772	down	yes
ENSMUSG00000004951	Hspb1	heat shock protein 1 [Source:MGI Symbol;Acc:MGI:96240]	protein_coding	120.019	97.7381	84.3058	228.196	116.446	127.518	0.639748	-0.644425	0.0118402	down	no
ENSMUSG00000022096	Hr	lysine demethylase and nuclear receptor corepressor [Source:MGI Symbol;Acc:MGI:96223]	protein_coding;processed_transcript	2.97723	3.32002	2.89567	4.87109	4.4398	3.97651	0.691852	-0.531464	0.0118892	down	no
ENSMUSG00000072647	Adam1a	a disintegrin and metallopeptidase domain 1a [Source:MGI Symbol;Acc:MGI:2429504]	protein_coding	0.385554	0.393408	0.362826	0.231023	0.402981	3.05077	0.309866	-1.69028	0.0122838	down	yes
ENSMUSG00000098369	Gm2274	predicted gene 2274 [Source:MGI Symbol;Acc:MGI:3780444]	unprocessed_pseudogene	8.62068	23.4157	3.32476	34.1223	21.8307	25.4339	0.434482	-1.20263	0.0124573	down	yes
ENSMUSG00000056737	Capg	capping protein (actin filament), gelsolin-like [Source:MGI Symbol;Acc:MGI:1098259]	protein_coding;retained_intron	69.9305	62.9022	62.3154	115.212	82.6641	80.4306	0.701198	-0.512107	0.012512	down	no
ENSMUSG00000000555	Itga5	integrin alpha 5 (fibronectin receptor alpha) [Source:MGI Symbol;Acc:MGI:96604]	protein_coding;retained_intron;nonsense_mediated_decay	58.778	53.0976	55.125	136.022	64.0247	65.3127	0.629339	-0.668091	0.01274	down	no
ENSMUSG00000030220	Arhgdib	Rho, GDP dissociation inhibitor (GDI) beta [Source:MGI Symbol;Acc:MGI:101940]	protein_coding	21.5774	30.574	22.7355	50.9547	32.8094	29.5109	0.661107	-0.597043	0.013419	down	no
ENSMUSG00000002033	Cd3g	CD3 antigen, gamma polypeptide [Source:MGI Symbol;Acc:MGI:88333]	protein_coding;retained_intron	0.162981	0.19248	0.133018	0.380875	0.362875	0.271827	0.480986	-1.05593	0.0135234	down	yes
ENSMUSG00000044533	Rps2	ribosomal protein S2 [Source:MGI Symbol;Acc:MGI:105110]	retained_intron;protein_coding	24.6223	21.477	20.3392	45.7383	26.2885	27.5527	0.66719	-0.58383	0.0136078	down	no
ENSMUSG00000005045	Chd5	chromodomain helicase DNA binding protein 5 [Source:MGI Symbol;Acc:MGI:3036258]	protein_coding;processed_transcript	0.0807414	0.107694	0.0726353	0.245187	0.162501	0.123351	0.491622	-1.02438	0.0138807	down	yes
ENSMUSG00000000631	Myo18a	myosin XVIIIA [Source:MGI Symbol;Acc:MGI:2667185]	protein_coding;retained_intron;processed_transcript	10.7762	9.88705	10.8883	21.2467	12.189	13.0873	0.67819	-0.560239	0.0141631	down	no
ENSMUSG00000032715	Trib3	tribbles pseudokinase 3 [Source:MGI Symbol;Acc:MGI:1345675]	protein_coding;processed_transcript;retained_intron	13.2595	11.6263	12.6221	24.6	15.9113	15.3424	0.67154	-0.574454	0.0144331	down	no
ENSMUSG00000074577	Ripor3	RIPOR family member 3 [Source:MGI Symbol;Acc:MGI:1916803]	protein_coding;retained_intron;processed_transcript	0.135302	0.122348	0.16209	0.410859	0.199598	0.255831	0.484527	-1.04535	0.0144892	down	yes
ENSMUSG00000117401	4833419F23Rik	RIKEN cDNA 4833419F23 gene [Source:NCBI gene;Acc:73915]	lincRNA	0.336645	0.589386	0.368669	1.04605	1.01389	0.67592	0.473233	-1.07938	0.0145813	down	yes
ENSMUSG00000034993	Vat1	vesicle amine transport 1 [Source:MGI Symbol;Acc:MGI:1349450]	protein_coding	122.898	106.401	107.028	249.98	129.342	134.066	0.655113	-0.610184	0.014728	down	no
ENSMUSG00000053113	Socs3	suppressor of cytokine signaling 3 [Source:MGI Symbol;Acc:MGI:1201791]	protein_coding;processed_transcript	15.4127	15.7482	16.0923	21.0246	20.9289	22.0829	0.737912	-0.43848	0.0147408	down	no
ENSMUSG00000026014	Raph1	Ras association (RalGDS/AF-6) and pleckstrin homology domains 1 [Source:MGI Symbol;Acc:MGI:1924550]	protein_coding;retained_intron	2.56028	2.12912	2.46506	2.96363	3.47072	3.32303	0.733235	-0.447652	0.0151725	down	no
ENSMUSG00000038034	Igsf8	immunoglobulin superfamily, member 8 [Source:MGI Symbol;Acc:MGI:2154090]	protein_coding;processed_transcript;retained_intron	8.77694	7.84941	8.5109	15.6108	9.96632	10.6018	0.694804	-0.525322	0.015222	down	no
ENSMUSG00000038872	Zfhx3	zinc finger homeobox 3 [Source:MGI Symbol;Acc:MGI:99948]	protein_coding;processed_transcript	0.280599	0.234355	0.281993	0.611231	0.310798	0.429814	0.589526	-0.762373	0.0152245	down	no
ENSMUSG00000040093	Bmf	BCL2 modifying factor [Source:MGI Symbol;Acc:MGI:2176433]	protein_coding;processed_transcript	2.42911	1.88424	2.94694	3.24048	3.48587	4.19766	0.664617	-0.589404	0.0152293	down	no
ENSMUSG00000056481	Cd248	CD248 antigen, endosialin [Source:MGI Symbol;Acc:MGI:1917695]	protein_coding	12.5483	10.5121	10.9775	25.0953	13.9099	13.3228	0.650474	-0.620437	0.0152696	down	no
ENSMUSG00000015647	Lama5	laminin, alpha 5 [Source:MGI Symbol;Acc:MGI:105382]	protein_coding;processed_transcript	15.5996	13.0816	15.5318	22.5448	17.999	20.1972	0.727895	-0.458197	0.015735	down	no
ENSMUSG00000018001	Cyth3	cytohesin 3 [Source:MGI Symbol;Acc:MGI:1335107]	protein_coding;retained_intron	6.08853	7.21509	6.77098	7.3215	9.53031	10.7568	0.727113	-0.459748	0.015828	down	no
ENSMUSG00000042644	Itpr3	inositol 1,4,5-triphosphate receptor 3 [Source:MGI Symbol;Acc:MGI:96624]	protein_coding;processed_transcript	8.00451	8.62776	9.10344	12.455	10.5477	12.0591	0.734012	-0.446124	0.0159641	down	no
ENSMUSG00000020821	Kif1c	kinesin family member 1C [Source:MGI Symbol;Acc:MGI:1098260]	protein_coding	36.8515	35.9167	35.8987	60.2707	45.7265	44.8663	0.7203	-0.473331	0.0160532	down	no
ENSMUSG00000030930	Chst15	carbohydrate sulfotransferase 15 [Source:MGI Symbol;Acc:MGI:1924840]	protein_coding;processed_transcript	3.83479	4.18579	4.19361	5.15355	5.92857	5.90526	0.719016	-0.475905	0.0161851	down	no
ENSMUSG00000057969	Sema3b	sema domain, immunoglobulin domain (Ig), short basic domain, secreted, (semaphorin) 3B [Source:MGI Symbol;Acc:MGI:107561]	protein_coding;nonsense_mediated_decay;retained_intron;processed_transcript	14.1959	12.1589	12.7576	17.3237	17.2626	18.0715	0.742764	-0.429024	0.0162294	down	no
ENSMUSG00000038244	Mical2	microtubule associated monooxygenase, calponin and LIM domain containing 2 [Source:MGI Symbol;Acc:MGI:2444947]	retained_intron;protein_coding;nonsense_mediated_decay	10.2617	9.40519	10.3818	13.7656	12.9651	13.7167	0.742907	-0.428747	0.0162319	down	no
ENSMUSG00000024130	Abca3	ATP-binding cassette, sub-family A (ABC1), member 3 [Source:MGI Symbol;Acc:MGI:1351617]	retained_intron;protein_coding;processed_transcript	1.75645	1.93525	1.73785	3.20541	2.1114	2.67646	0.679265	-0.557953	0.0162965	down	no
ENSMUSG00000106574	Gm2451	predicted pseudogene 2451 [Source:MGI Symbol;Acc:MGI:3780618]	processed_pseudogene	15.359	29.9495	13.2902	43.6554	25.4835	28.4126	0.600695	-0.735294	0.0164002	down	no
ENSMUSG00000029844	Hoxa1	homeobox A1 [Source:MGI Symbol;Acc:MGI:96170]	protein_coding	0.899865	1.01291	0.949952	1.50707	1.65685	1.72583	0.585454	-0.772373	0.0164779	down	no
ENSMUSG00000001288	Rarg	retinoic acid receptor, gamma [Source:MGI Symbol;Acc:MGI:97858]	protein_coding;processed_transcript	26.3706	24.4877	24.7857	41.5932	31.2533	31.7761	0.723018	-0.467896	0.0166333	down	no
ENSMUSG00000026407	Cacna1s	calcium channel, voltage-dependent, L type, alpha 1S subunit [Source:MGI Symbol;Acc:MGI:88294]	protein_coding;retained_intron;processed_transcript	20.0193	18.7152	20.6599	38.6031	22.531	24.8063	0.69111	-0.533012	0.0166369	down	no
ENSMUSG00000103037	Pcdhgb1	protocadherin gamma subfamily B, 1 [Source:MGI Symbol;Acc:MGI:1935169]	protein_coding;processed_transcript	1.45853	1.8138	2.26296	19.4107	0.961367	0.689415	0.262816	-1.92788	0.0166969	down	yes
ENSMUSG00000049872	Calhm5	calcium homeostasis modulator family member 5 [Source:MGI Symbol;Acc:MGI:2143897]	protein_coding	0.14301	0.120711	0.078494	0.165942	0.201591	0.341373	0.482737	-1.05069	0.0168047	down	yes
ENSMUSG00000046138	9930021J03Rik	RIKEN cDNA 9930021J03 gene [Source:MGI Symbol;Acc:MGI:2444398]	protein_coding;nonsense_mediated_decay	0.490462	2.68376	0.584875	1.29309	3.72736	4.16034	0.409453	-1.28823	0.0169172	down	yes
ENSMUSG00000002603	Tgfb1	transforming growth factor, beta 1 [Source:MGI Symbol;Acc:MGI:98725]	protein_coding;nonsense_mediated_decay;processed_transcript;retained_intron	21.2302	19.5855	18.536	53.1388	22.2072	21.254	0.614406	-0.702735	0.0172151	down	no
ENSMUSG00000070047	Fat1	FAT atypical cadherin 1 [Source:MGI Symbol;Acc:MGI:109168]	protein_coding;retained_intron;nonsense_mediated_decay	6.13308	6.02996	7.06489	7.58417	8.57733	9.79167	0.74087	-0.432707	0.0174446	down	no
ENSMUSG00000034932	Mrpl54	mitochondrial ribosomal protein L54 [Source:MGI Symbol;Acc:MGI:1913297]	protein_coding;retained_intron	22.5735	18.8268	16.9419	42.9745	27.2575	20.9729	0.639683	-0.644571	0.0176727	down	no
ENSMUSG00000022197	Pdzd2	PDZ domain containing 2 [Source:MGI Symbol;Acc:MGI:1922394]	protein_coding;retained_intron;processed_transcript	0.0414899	0.0386349	0.0381748	0.0587912	0.0774036	0.0913367	0.519927	-0.94362	0.0177281	down	no
ENSMUSG00000037465	Klf10	Kruppel-like factor 10 [Source:MGI Symbol;Acc:MGI:1101353]	protein_coding	8.0637	8.51122	23.2582	15.1585	26.844	27.9182	0.56969	-0.81175	0.0179559	down	no
ENSMUSG00000028465	Tln1	talin 1 [Source:MGI Symbol;Acc:MGI:1099832]	protein_coding;processed_transcript	51.2647	50.7839	53.1106	102.99	58.3778	64.1545	0.688	-0.53952	0.0181743	down	no
ENSMUSG00000056174	Col8a2	collagen, type VIII, alpha 2 [Source:MGI Symbol;Acc:MGI:88464]	protein_coding	5.35817	5.99811	4.62801	7.24733	7.32167	7.81917	0.713962	-0.486081	0.0182654	down	no
ENSMUSG00000024866	Acy3	aspartoacylase (aminoacylase) 3 [Source:MGI Symbol;Acc:MGI:1918920]	protein_coding;processed_transcript;retained_intron	0.640742	0.415767	0.397373	1.11334	0.78735	0.910214	0.51723	-0.951122	0.0183618	down	no
ENSMUSG00000079243	Xirp1	xin actin-binding repeat containing 1 [Source:MGI Symbol;Acc:MGI:1333878]	protein_coding	16.5459	14.8304	15.5304	29.2935	18.1619	19.255	0.703139	-0.508119	0.0183868	down	no
ENSMUSG00000078920	Ifi47	interferon gamma inducible protein 47 [Source:MGI Symbol;Acc:MGI:99448]	protein_coding	0.682398	0.790847	0.573052	1.32046	1.08891	1.20088	0.566803	-0.819081	0.0183985	down	no
ENSMUSG00000027346	Gpcpd1	glycerophosphocholine phosphodiesterase 1 [Source:MGI Symbol;Acc:MGI:104898]	protein_coding;retained_intron;processed_transcript;nonsense_mediated_decay	1.88099	1.98578	2.42095	2.09297	3.89522	3.49391	0.663115	-0.592669	0.0189251	down	no
ENSMUSG00000035673	Sbno2	strawberry notch 2 [Source:MGI Symbol;Acc:MGI:2448490]	protein_coding;retained_intron;nonsense_mediated_decay	7.02054	6.19473	6.33416	9.84218	7.85534	8.87569	0.735682	-0.442846	0.0189936	down	no
ENSMUSG00000030605	Mfge8	milk fat globule-EGF factor 8 protein [Source:MGI Symbol;Acc:MGI:102768]	protein_coding;retained_intron;nonsense_mediated_decay;processed_transcript	33.6393	35.6739	29.9885	48.7668	43.3548	41.9421	0.740705	-0.43303	0.0191352	down	no
ENSMUSG00000090399	Gm38399	predicted gene, 38399 [Source:MGI Symbol;Acc:MGI:5620007]	lincRNA	0.065919	0.685352	0.636945	1.6686	0.803158	1.23922	0.374084	-1.41857	0.0192114	down	yes
ENSMUSG00000014498	Ankrd52	ankyrin repeat domain 52 [Source:MGI Symbol;Acc:MGI:2444029]	protein_coding;retained_intron	9.41761	8.62558	9.62458	13.4427	11.7341	12.0579	0.743063	-0.428443	0.0192599	down	no
ENSMUSG00000001467	Cyp51	cytochrome P450, family 51 [Source:MGI Symbol;Acc:MGI:106040]	protein_coding;processed_transcript;retained_intron	25.8884	29.434	27.9932	33.2183	38.6102	39.2591	0.75	-0.415037	0.0193201	down	no
ENSMUSG00000074457	S100a16	S100 calcium binding protein A16 [Source:MGI Symbol;Acc:MGI:1915110]	protein_coding;processed_transcript	58.9141	55.1276	45.6842	98.5526	66.1153	62.4493	0.703275	-0.507839	0.0194534	down	no
ENSMUSG00000047986	Palm3	paralemmin 3 [Source:MGI Symbol;Acc:MGI:1921587]	protein_coding;retained_intron	0.744059	0.665501	0.66352	1.1929	1.2529	1.0133	0.599311	-0.738622	0.0194593	down	no
ENSMUSG00000030319	Cand2	cullin-associated and neddylation-dissociated 2 (putative) [Source:MGI Symbol;Acc:MGI:1914338]	protein_coding	7.14174	6.58836	7.42302	11.8193	8.17495	9.53055	0.716454	-0.481055	0.0195121	down	no
ENSMUSG00000040711	Sh3pxd2b	SH3 and PX domains 2B [Source:MGI Symbol;Acc:MGI:2442062]	protein_coding;retained_intron	9.94995	9.73022	10.0207	18.873	11.3373	12.1175	0.701688	-0.511099	0.0195246	down	no
ENSMUSG00000069893	9930111J21Rik1	RIKEN cDNA 9930111J21 gene 1 [Source:MGI Symbol;Acc:MGI:3041173]	protein_coding	0.215896	0.441714	0.389889	0.324048	0.721342	1.17903	0.470908	-1.08648	0.0195979	down	yes
ENSMUSG00000006356	Crip2	cysteine rich protein 2 [Source:MGI Symbol;Acc:MGI:1915587]	protein_coding;retained_intron	127.172	106.87	105.883	214.677	108.4	174.497	0.683165	-0.549694	0.0196763	down	no
ENSMUSG00000034926	Dhcr24	24-dehydrocholesterol reductase [Source:MGI Symbol;Acc:MGI:1922004]	protein_coding	15.0687	13.9018	14.4926	28.2026	15.6593	18.6915	0.694817	-0.525294	0.0197717	down	no
ENSMUSG00000015093	Clic3	chloride intracellular channel 3 [Source:MGI Symbol;Acc:MGI:1916704]	processed_transcript;protein_coding	11.1571	9.38159	9.54703	22.3692	11.7712	13.1466	0.636237	-0.652365	0.0202573	down	no
ENSMUSG00000000223	Drp2	dystrophin related protein 2 [Source:MGI Symbol;Acc:MGI:107432]	protein_coding;retained_intron;processed_transcript	4.7855	4.45532	6.96235	5.06238	8.91757	10.0637	0.673906	-0.569381	0.0205623	down	no
ENSMUSG00000038264	Sema7a	sema domain, immunoglobulin domain (Ig), and GPI membrane anchor, (semaphorin) 7A [Source:MGI Symbol;Acc:MGI:1306826]	protein_coding;nonsense_mediated_decay	29.4438	28.6413	26.9244	38.3375	36.1452	38.1099	0.755019	-0.405416	0.0206112	down	no
ENSMUSG00000057337	Chst3	carbohydrate sulfotransferase 3 [Source:MGI Symbol;Acc:MGI:1858224]	protein_coding	1.98459	1.79905	1.9541	2.17918	3.02617	3.09392	0.691356	-0.5325	0.0206333	down	no
ENSMUSG00000037679	Inf2	inverted formin, FH2 and WH2 domain containing [Source:MGI Symbol;Acc:MGI:1917685]	protein_coding	26.9085	24.8706	26.8625	57.7238	30.878	28.5947	0.671023	-0.575566	0.0206563	down	no
ENSMUSG00000025511	Tspan4	tetraspanin 4 [Source:MGI Symbol;Acc:MGI:1928097]	protein_coding;retained_intron	30.2069	21.7223	20.4464	51.3012	26.6158	30.5537	0.667237	-0.583729	0.020699	down	no
ENSMUSG00000028042	Zbtb7b	zinc finger and BTB domain containing 7B [Source:MGI Symbol;Acc:MGI:102755]	protein_coding;processed_transcript	6.06528	5.89027	6.18353	10.1159	7.43352	7.72084	0.717803	-0.47834	0.0207261	down	no
ENSMUSG00000022565	Plec	plectin [Source:MGI Symbol;Acc:MGI:1277961]	protein_coding;retained_intron	12.9537	10.2612	11.5094	25.5184	13.038	13.4133	0.668164	-0.581725	0.020743	down	no
ENSMUSG00000064348	mt-Tn	mitochondrially encoded tRNA asparagine [Source:MGI Symbol;Acc:MGI:102479]	Mt_tRNA	111.294	123.64	119.015	350.048	130.411	135.878	0.574279	-0.800178	0.020764	down	no
ENSMUSG00000002289	Angptl4	angiopoietin-like 4 [Source:MGI Symbol;Acc:MGI:1888999]	protein_coding;retained_intron;nonsense_mediated_decay;processed_transcript	12.3683	7.31103	12.6245	15.7049	14.604	15.7162	0.701874	-0.510716	0.020956	down	no
ENSMUSG00000081534	Slc48a1	solute carrier family 48 (heme transporter), member 1 [Source:MGI Symbol;Acc:MGI:1914989]	protein_coding;processed_transcript;nonsense_mediated_decay	31.4242	30.1322	31.4764	54.8681	36.255	38.112	0.719873	-0.474185	0.0210226	down	no
ENSMUSG00000007833	Aldh16a1	aldehyde dehydrogenase 16 family, member A1 [Source:MGI Symbol;Acc:MGI:1916998]	retained_intron;protein_coding;nonsense_mediated_decay;processed_transcript	1.90006	1.68006	1.6677	3.5336	1.9006	2.63191	0.650601	-0.620155	0.0217407	down	no
ENSMUSG00000069014	Gm5641	predicted gene 5641 [Source:MGI Symbol;Acc:MGI:3645731]	processed_transcript;transcribed_processed_pseudogene	11.2822	11.4482	7.50943	7.0643	32.8559	16.1122	0.539685	-0.88981	0.0217419	down	no
ENSMUSG00000068758	Il3ra	interleukin 3 receptor, alpha chain [Source:MGI Symbol;Acc:MGI:96553]	protein_coding;retained_intron;processed_transcript	3.78213	2.71395	2.60861	7.05371	3.79994	3.80022	0.621316	-0.686601	0.0217804	down	no
ENSMUSG00000072812	Ahnak2	AHNAK nucleoprotein 2 [Source:MGI Symbol;Acc:MGI:2144831]	protein_coding	5.74042	5.04386	5.19441	8.44382	6.77514	6.46215	0.736987	-0.440289	0.0219392	down	no
ENSMUSG00000031387	Renbp	renin binding protein [Source:MGI Symbol;Acc:MGI:105940]	protein_coding;retained_intron;processed_transcript;nonsense_mediated_decay	11.6181	13.7417	10.7919	21.0264	13.9029	16.4723	0.703318	-0.507752	0.0219971	down	no
ENSMUSG00000041842	Fhdc1	FH2 domain containing 1 [Source:MGI Symbol;Acc:MGI:2684972]	protein_coding;retained_intron;processed_transcript	0.499858	0.629717	0.697593	0.833339	1.06572	1.0443	0.620776	-0.687856	0.0220623	down	no
ENSMUSG00000037060	Cavin3	caveolae associated 3 [Source:MGI Symbol;Acc:MGI:1923422]	protein_coding	41.9974	38.8167	35.33	68.1675	50.3229	43.5347	0.716828	-0.480301	0.022204	down	no
ENSMUSG00000070691	Runx3	runt related transcription factor 3 [Source:MGI Symbol;Acc:MGI:102672]	protein_coding;processed_transcript;retained_intron	3.6598	3.13018	3.21552	5.68229	4.07925	4.54978	0.699132	-0.516363	0.0222155	down	no
ENSMUSG00000008855	Hdac5	histone deacetylase 5 [Source:MGI Symbol;Acc:MGI:1333784]	protein_coding;retained_intron;processed_transcript;nonsense_mediated_decay	7.17254	5.6879	5.43279	10.2514	7.63205	7.48251	0.721171	-0.471586	0.0227428	down	no
ENSMUSG00000044447	Dock5	dedicator of cytokinesis 5 [Source:MGI Symbol;Acc:MGI:2652871]	protein_coding;retained_intron	3.50305	3.88816	4.00117	4.53395	5.15462	5.45999	0.752043	-0.411112	0.0229112	down	no
ENSMUSG00000090610	Gm3571	predicted gene 3571 [Source:MGI Symbol;Acc:MGI:3781748]	processed_pseudogene	12.1565	11.8156	10.4479	19.1984	14.0033	16.5715	0.691537	-0.532122	0.0230526	down	no
ENSMUSG00000041642	Kif21b	kinesin family member 21B [Source:MGI Symbol;Acc:MGI:109234]	nonsense_mediated_decay;protein_coding;retained_intron;processed_transcript	1.26299	1.18928	1.39263	1.60308	1.85218	1.94981	0.711349	-0.49137	0.0231688	down	no
ENSMUSG00000020092	Pald1	phosphatase domain containing, paladin 1 [Source:MGI Symbol;Acc:MGI:1351623]	protein_coding;retained_intron;processed_transcript	8.63923	7.53084	8.33032	12.6842	10.292	10.3816	0.734471	-0.445222	0.0232904	down	no
ENSMUSG00000026208	Des	desmin [Source:MGI Symbol;Acc:MGI:94885]	protein_coding;retained_intron	428.74	390.201	375.351	799.241	462.73	456.457	0.694991	-0.524934	0.0233228	down	no
ENSMUSG00000045752	Tssc4	tumor-suppressing subchromosomal transferable fragment 4 [Source:MGI Symbol;Acc:MGI:1861712]	protein_coding;retained_intron	6.89475	5.53401	5.49123	6.80591	6.19194	17.5928	0.585799	-0.771522	0.0233533	down	no
ENSMUSG00000040557	Mettl27	methyltransferase like 27 [Source:MGI Symbol;Acc:MGI:1933146]	protein_coding;processed_transcript	3.4565	1.20576	1.99881	3.69547	3.86591	3.6401	0.59466	-0.749862	0.0234186	down	no
ENSMUSG00000107951	Gm6210	predicted gene 6210 [Source:MGI Symbol;Acc:MGI:3643375]	processed_pseudogene	2.30295	2.85116	2.17714	6.52703	2.66121	3.52219	0.57679	-0.793881	0.0236072	down	no
ENSMUSG00000041313	Slc7a1	solute carrier family 7 (cationic amino acid transporter, y+ system), member 1 [Source:MGI Symbol;Acc:MGI:88117]	protein_coding;retained_intron	5.814	5.88373	6.51915	8.64205	7.98157	7.60654	0.751826	-0.411528	0.0238232	down	no
ENSMUSG00000028860	Sytl1	synaptotagmin-like 1 [Source:MGI Symbol;Acc:MGI:1933365]	protein_coding;processed_transcript	1.40973	0.990204	1.02661	2.40059	1.67918	1.63718	0.599365	-0.738494	0.0239723	down	no
ENSMUSG00000039824	Myl6b	myosin, light polypeptide 6B [Source:MGI Symbol;Acc:MGI:1917789]	protein_coding;retained_intron	28.5546	25.1082	23.1953	63.7545	27.908	28.0297	0.642131	-0.63906	0.0240653	down	no
ENSMUSG00000026308	Klhl30	kelch-like 30 [Source:MGI Symbol;Acc:MGI:1918038]	protein_coding	51.7057	47.4407	46.3875	86.437	57.145	58.0157	0.721903	-0.470123	0.0243164	down	no
ENSMUSG00000034201	Gas2l1	growth arrest-specific 2 like 1 [Source:MGI Symbol;Acc:MGI:1926176]	processed_transcript;protein_coding	5.99342	5.11046	8.97561	14.361	8.05759	8.01919	0.65969	-0.600141	0.0243563	down	no
ENSMUSG00000026450	Chit1	chitinase 1 (chitotriosidase) [Source:MGI Symbol;Acc:MGI:1919134]	protein_coding	0.472755	0.261619	0.432837	0.62192	0.831199	0.737025	0.532938	-0.90796	0.0245735	down	no
ENSMUSG00000090053	Palm2	paralemmin 2 [Source:MGI Symbol;Acc:MGI:1934601]	protein_coding;retained_intron;nonsense_mediated_decay	0.314388	0.354304	0.815033	0.511099	1.59362	1.03696	0.472272	-1.08231	0.0245956	down	yes
ENSMUSG00000029547	Ints1	integrator complex subunit 1 [Source:MGI Symbol;Acc:MGI:1915760]	protein_coding;retained_intron	4.14262	3.38841	3.78774	8.18051	4.28789	4.30242	0.674909	-0.567236	0.0246215	down	no
ENSMUSG00000030735	Gm9755	predicted pseudogene 9755 [Source:MGI Symbol;Acc:MGI:3642279]	processed_pseudogene	0.509499	1.02624	1.42388	1.72798	2.10726	1.7835	0.526739	-0.924839	0.0248307	down	no
ENSMUSG00000004665	Cnn2	calponin 2 [Source:MGI Symbol;Acc:MGI:105093]	protein_coding	88.744	86.3021	79.6258	146.676	101.071	101.577	0.729042	-0.455927	0.0251172	down	no
ENSMUSG00000032812	Arap1	ArfGAP with RhoGAP domain, ankyrin repeat and PH domain 1 [Source:MGI Symbol;Acc:MGI:1916960]	protein_coding;retained_intron;processed_transcript	3.19086	3.17999	3.2404	5.02328	3.87292	4.34779	0.725707	-0.462541	0.0251463	down	no
ENSMUSG00000004473	Clec11a	C-type lectin domain family 11, member a [Source:MGI Symbol;Acc:MGI:1298219]	protein_coding	0.433888	0.466919	0.576783	0.844902	0.989836	0.741956	0.573444	-0.802275	0.0252328	down	no
ENSMUSG00000075289	Carns1	carnosine synthase 1 [Source:MGI Symbol;Acc:MGI:2147595]	retained_intron;protein_coding;processed_transcript	4.18848	3.59897	3.86111	5.45521	4.68359	6.1191	0.716486	-0.48099	0.0253425	down	no
ENSMUSG00000020150	Gamt	guanidinoacetate methyltransferase [Source:MGI Symbol;Acc:MGI:1098221]	protein_coding;retained_intron	15.7039	14.6462	13.5746	30.0904	17.7398	16.8064	0.679563	-0.557321	0.0253766	down	no
ENSMUSG00000025172	Ankrd2	ankyrin repeat domain 2 (stretch responsive muscle) [Source:MGI Symbol;Acc:MGI:1861447]	protein_coding	38.2723	32.66	31.1024	64.9878	38.9783	41.114	0.703299	-0.507789	0.0253939	down	no
ENSMUSG00000042524	Sun2	Sad1 and UNC84 domain containing 2 [Source:MGI Symbol;Acc:MGI:2443011]	protein_coding;retained_intron	17.1886	15.8324	18.5121	26.8751	26.1439	17.6178	0.729549	-0.454923	0.0254353	down	no
ENSMUSG00000045055	Rpsa-ps2	ribosomal protein SA, pseudogene 2 [Source:MGI Symbol;Acc:MGI:3643356]	processed_pseudogene	37.7531	36.3489	33.0192	69.3201	46.9888	37.9527	0.694412	-0.526135	0.0254666	down	no
ENSMUSG00000005611	Mrvi1	MRV integration site 1 [Source:MGI Symbol;Acc:MGI:1338023]	protein_coding;retained_intron;processed_transcript	0.201838	0.165885	0.176653	0.306187	0.31521	0.319018	0.578868	-0.788695	0.0254771	down	no
ENSMUSG00000037148	Arhgap10	Rho GTPase activating protein 10 [Source:MGI Symbol;Acc:MGI:1925764]	protein_coding	15.9949	15.3466	15.721	24.3538	19.231	19.6281	0.744508	-0.425641	0.0257045	down	no
ENSMUSG00000115505	Gm9247	predicted gene 9247 [Source:MGI Symbol;Acc:MGI:3648323]	processed_pseudogene	0.700695	1.22102	0.740925	1.75452	1.33146	1.88015	0.53616	-0.899264	0.0261228	down	no
ENSMUSG00000030990	Pgap2	post-GPI attachment to proteins 2 [Source:MGI Symbol;Acc:MGI:2385286]	protein_coding;retained_intron;nonsense_mediated_decay;processed_transcript	3.28511	3.97292	1.5013	5.70117	5.06104	3.52689	0.613008	-0.706022	0.0261273	down	no
ENSMUSG00000027313	Chac1	ChaC, cation transport regulator 1 [Source:MGI Symbol;Acc:MGI:1916315]	protein_coding	21.6273	16.3837	17.4993	32.819	24.0736	21.486	0.708233	-0.497704	0.0262207	down	no
ENSMUSG00000097248	Gm2694	predicted gene 2694 [Source:MGI Symbol;Acc:MGI:3780864]	lincRNA	0.239137	0.116687	0.179986	0.298307	0.388776	0.292672	0.546881	-0.8707	0.0262394	down	no
ENSMUSG00000114738	Gm41041	predicted gene, 41041 [Source:MGI Symbol;Acc:MGI:5623926]	processed_pseudogene	2.15004	1.61305	1.35821	5.42786	2.82811	1.80655	0.508948	-0.97441	0.0262836	down	no
ENSMUSG00000001131	Timp1	tissue inhibitor of metalloproteinase 1 [Source:MGI Symbol;Acc:MGI:98752]	protein_coding	499.698	474.434	463.654	728.131	576.946	612.938	0.749621	-0.415767	0.0263107	down	no
ENSMUSG00000031391	L1cam	L1 cell adhesion molecule [Source:MGI Symbol;Acc:MGI:96721]	protein_coding;retained_intron;processed_transcript	1.42859	1.5429	1.40095	1.8132	1.92946	2.56298	0.693418	-0.528203	0.026358	down	no
ENSMUSG00000029119	Man2b2	mannosidase 2, alpha B2 [Source:MGI Symbol;Acc:MGI:1195262]	protein_coding	12.4699	11.3228	12.2835	18.0924	14.7331	15.5066	0.746424	-0.421933	0.0266481	down	no
ENSMUSG00000044134	Pheta1	PH domain containing endocytic trafficking adaptor 1 [Source:MGI Symbol;Acc:MGI:2442708]	protein_coding	1.34748	3.47437	2.27453	5.04752	3.78688	3.25933	0.586782	-0.769105	0.0267051	down	no
ENSMUSG00000103735	Gm38317	predicted gene, 38317 [Source:MGI Symbol;Acc:MGI:5611545]	processed_pseudogene	35	30.8553	30.0597	52.7829	42.1971	42.5997	0.69716	-0.520438	0.0267247	down	no
ENSMUSG00000030087	Klf15	Kruppel-like factor 15 [Source:MGI Symbol;Acc:MGI:1929988]	protein_coding	0.210088	0.179584	0.232208	0.473878	0.321014	0.367483	0.535008	-0.902367	0.0267463	down	no
ENSMUSG00000102224	4930447F24Rik	RIKEN cDNA 4930447F24 gene [Source:MGI Symbol;Acc:MGI:1924123]	antisense;retained_intron	3.74917	2.94245	2.74201	4.85311	4.85362	4.92605	0.644691	-0.633319	0.0267545	down	no
ENSMUSG00000046761	Fam83h	family with sequence similarity 83, member H [Source:MGI Symbol;Acc:MGI:2145900]	protein_coding	3.68421	4.0173	3.45622	7.52332	4.22274	4.67353	0.679538	-0.557374	0.0268429	down	no
ENSMUSG00000034488	Edil3	EGF-like repeats and discoidin I-like domains 3 [Source:MGI Symbol;Acc:MGI:1329025]	protein_coding;retained_intron;processed_transcript	2.2106	2.88836	3.11654	2.86332	4.31731	4.18001	0.723154	-0.467625	0.0270168	down	no
ENSMUSG00000023008	Fmnl3	formin-like 3 [Source:MGI Symbol;Acc:MGI:109569]	protein_coding;processed_transcript;retained_intron	39.2602	36.303	37.5872	56.1679	46.9513	46.6478	0.75551	-0.404477	0.0271073	down	no
ENSMUSG00000027630	Tbl1xr1	transducin (beta)-like 1X-linked receptor 1 [Source:MGI Symbol;Acc:MGI:2441730]	protein_coding;processed_transcript;nonsense_mediated_decay	1.8275	2.10799	2.17237	4.37686	2.29262	2.45429	0.669445	-0.578962	0.0272685	down	no
ENSMUSG00000033788	Dysf	dysferlin [Source:MGI Symbol;Acc:MGI:1349385]	protein_coding;processed_transcript;retained_intron	8.87211	7.50815	8.26635	13.0628	9.95787	10.1238	0.743612	-0.427379	0.0275458	down	no
ENSMUSG00000023032	Slc4a8	solute carrier family 4 (anion exchanger), member 8 [Source:MGI Symbol;Acc:MGI:1928745]	protein_coding;processed_transcript;retained_intron	0.809697	0.712857	0.749439	1.39666	0.904149	1.04676	0.6787	-0.559154	0.0275659	down	no
ENSMUSG00000047824	Pygo2	pygopus 2 [Source:MGI Symbol;Acc:MGI:1916161]	protein_coding;processed_transcript	5.74294	4.02982	0.873525	1.29641	19.3003	9.37697	0.355188	-1.49334	0.0276052	down	yes
ENSMUSG00000039262	Prrc2b	proline-rich coiled-coil 2B [Source:MGI Symbol;Acc:MGI:1923304]	protein_coding;processed_transcript	5.83034	5.25271	6.60792	9.67035	6.53816	7.94183	0.732535	-0.44903	0.0276094	down	no
ENSMUSG00000037887	Dusp8	dual specificity phosphatase 8 [Source:MGI Symbol;Acc:MGI:106626]	protein_coding	3.5565	3.44233	3.53115	5.73263	4.378	4.57971	0.716795	-0.480367	0.0278514	down	no
ENSMUSG00000036918	Ttc7	tetratricopeptide repeat domain 7 [Source:MGI Symbol;Acc:MGI:1920999]	protein_coding;processed_transcript;nonsense_mediated_decay;retained_intron	3.2523	2.74197	3.13051	6.27895	3.53798	3.56906	0.681667	-0.552861	0.0280956	down	no
ENSMUSG00000040562	Gstm2	glutathione S-transferase, mu 2 [Source:MGI Symbol;Acc:MGI:95861]	protein_coding;retained_intron	18.4114	16.3606	15.7408	25.6443	21.2369	21.92	0.734185	-0.445785	0.0280993	down	no
ENSMUSG00000004056	Akt2	thymoma viral proto-oncogene 2 [Source:MGI Symbol;Acc:MGI:104874]	retained_intron;protein_coding;processed_transcript	27.3631	26.1691	13.2481	42.9096	27.313	29.1569	0.671972	-0.573527	0.0281555	down	no
ENSMUSG00000079654	Prrt4	proline-rich transmembrane protein 4 [Source:MGI Symbol;Acc:MGI:2141677]	protein_coding	1.68814	1.36155	1.27024	3.10843	1.75621	2.0968	0.620552	-0.688377	0.0281969	down	no
ENSMUSG00000059195	Gm12715	predicted gene 12715 [Source:MGI Symbol;Acc:MGI:3650759]	processed_pseudogene	151.157	97.1509	152.383	284.347	114.875	213.511	0.653941	-0.612768	0.0282881	down	no
ENSMUSG00000020475	Pgam2	phosphoglycerate mutase 2 [Source:MGI Symbol;Acc:MGI:1933118]	protein_coding	44.7637	36.8747	33.8606	88.1109	43.3103	42.7127	0.663277	-0.592317	0.0283132	down	no
ENSMUSG00000049690	Nckap5	NCK-associated protein 5 [Source:MGI Symbol;Acc:MGI:2686394]	protein_coding;retained_intron;processed_transcript	0.0197567	0.0168862	0.0736852	0.0661084	0.110022	0.0749506	0.439413	-1.18635	0.0283739	down	yes
ENSMUSG00000019302	Atp6v0a1	ATPase, H+ transporting, lysosomal V0 subunit A1 [Source:MGI Symbol;Acc:MGI:103286]	protein_coding;processed_transcript	7.33417	6.88418	7.1924	13.1136	8.25401	8.39561	0.71937	-0.475194	0.0283753	down	no
ENSMUSG00000093577	Gm20632	predicted gene 20632 [Source:MGI Symbol;Acc:MGI:5313079]	antisense	2.20816	1.71579	2.95292	3.4638	4.35198	3.03969	0.633494	-0.658598	0.028581	down	no
ENSMUSG00000036698	Ago2	argonaute RISC catalytic subunit 2 [Source:MGI Symbol;Acc:MGI:2446632]	protein_coding;processed_transcript	9.94213	8.82588	9.72418	14.5921	12.0189	11.2427	0.752691	-0.409871	0.0285863	down	no
ENSMUSG00000004044	Cavin1	caveolae associated 1 [Source:MGI Symbol;Acc:MGI:1277968]	protein_coding;processed_transcript	83.2084	80.2553	77.1408	110.802	108.146	96.3771	0.763036	-0.390178	0.0286037	down	no
ENSMUSG00000024437	Gm8615	predicted pseudogene 8615 [Source:MGI Symbol;Acc:MGI:3647532]	transcribed_processed_pseudogene;processed_transcript	3.03575	3.50017	3.30228	3.27481	4.94022	8.69383	0.581837	-0.781313	0.0287017	down	no
ENSMUSG00000040596	Pogk	pogo transposable element with KRAB domain [Source:MGI Symbol;Acc:MGI:1918842]	protein_coding;nonsense_mediated_decay	0.979899	1.55206	1.76985	1.76253	2.72664	1.94057	0.669049	-0.579816	0.0288509	down	no
ENSMUSG00000060568	Fam78b	family with sequence similarity 78, member B [Source:MGI Symbol;Acc:MGI:2443050]	protein_coding;nonsense_mediated_decay	0.535999	0.502937	0.575475	0.685297	0.893727	0.972287	0.632777	-0.660231	0.0289777	down	no
ENSMUSG00000116275	Zc3h11a	zinc finger CCCH type containing 11A [Source:MGI Symbol;Acc:MGI:1917829]	protein_coding	0.0001	0.647336	7.27646	26.6504	5.43915	19.1252	0.154719	-2.69228	0.0289867	down	yes
ENSMUSG00000083380	Ndufb4c	NADH:ubiquinone oxidoreductase subunit B4C [Source:MGI Symbol;Acc:MGI:3781422]	processed_pseudogene	6.24369	7.08129	7.38875	9.42895	22.4912	6.69018	0.536482	-0.898399	0.0290592	down	no
ENSMUSG00000064337	mt-Rnr1	mitochondrially encoded 12S rRNA [Source:MGI Symbol;Acc:MGI:102493]	Mt_rRNA	118.1	119.608	120.643	325.566	144.595	103.236	0.624961	-0.678161	0.0290821	down	no
ENSMUSG00000033955	Tnks1bp1	tankyrase 1 binding protein 1 [Source:MGI Symbol;Acc:MGI:2446193]	processed_transcript;protein_coding	30.6131	29.5928	30.1254	49.0182	36.5124	35.6334	0.745529	-0.423663	0.0290943	down	no
ENSMUSG00000026456	Cyb5r1	cytochrome b5 reductase 1 [Source:MGI Symbol;Acc:MGI:1919267]	nonsense_mediated_decay;protein_coding;retained_intron;processed_transcript	34.9793	20.3823	18.0175	35.1273	35.3272	32.9451	0.709665	-0.49479	0.029152	down	no
ENSMUSG00000035372	1810055G02Rik	RIKEN cDNA 1810055G02 gene [Source:MGI Symbol;Acc:MGI:1919306]	protein_coding;processed_transcript	8.14943	7.09561	7.12956	9.04873	7.82549	16.3605	0.673229	-0.570831	0.0291666	down	no
ENSMUSG00000024617	Camk2a	calcium/calmodulin-dependent protein kinase II alpha [Source:MGI Symbol;Acc:MGI:88256]	protein_coding;retained_intron	1.44245	1.82892	1.68137	1.84942	2.11787	3.31453	0.680151	-0.556073	0.0292815	down	no
ENSMUSG00000027460	Angpt4	angiopoietin 4 [Source:MGI Symbol;Acc:MGI:1336887]	protein_coding	13.5324	13.3491	13.5288	16.9844	17.5746	19.2519	0.750967	-0.413178	0.0292856	down	no
ENSMUSG00000028328	Tmod1	tropomodulin 1 [Source:MGI Symbol;Acc:MGI:98775]	protein_coding;processed_transcript	12.1236	10.7369	13.4326	16.4202	15.895	15.6084	0.757313	-0.401039	0.0293064	down	no
ENSMUSG00000031903	Pla2g15	phospholipase A2, group XV [Source:MGI Symbol;Acc:MGI:2178076]	protein_coding;retained_intron;processed_transcript	12.529	13.4976	11.922	18.164	15.8233	16.4098	0.752993	-0.409292	0.0293101	down	no
ENSMUSG00000030688	Stard10	START domain containing 10 [Source:MGI Symbol;Acc:MGI:1860093]	protein_coding;retained_intron;nonsense_mediated_decay	4.60654	4.11721	4.4159	10.3011	4.79271	5.36634	0.642205	-0.638894	0.0295187	down	no
ENSMUSG00000030361	Klrb1a	killer cell lectin-like receptor subfamily B member 1A [Source:MGI Symbol;Acc:MGI:107540]	protein_coding	0.629137	0.45404	0.443203	0.785453	0.700779	1.40355	0.528199	-0.920847	0.0297169	down	no
ENSMUSG00000030701	Plekhb1	pleckstrin homology domain containing, family B (evectins) member 1 [Source:MGI Symbol;Acc:MGI:1351469]	protein_coding;retained_intron	0.1734	0.369471	0.236023	0.5491	0.483862	0.403627	0.542183	-0.883149	0.0298194	down	no
ENSMUSG00000030399	Ckm	creatine kinase, muscle [Source:MGI Symbol;Acc:MGI:88413]	protein_coding;processed_transcript	40.8362	36.7572	35.7066	81.1464	41.3147	41.907	0.689306	-0.536783	0.0298715	down	no
ENSMUSG00000081021	Gm11964	predicted gene 11964 [Source:MGI Symbol;Acc:MGI:3652241]	processed_pseudogene	2.53214	2.65371	2.35311	5.64956	3.58076	4.03784	0.5682	-0.81553	0.029924	down	no
ENSMUSG00000032182	Yipf2	Yip1 domain family, member 2 [Source:MGI Symbol;Acc:MGI:1922016]	protein_coding	2.083	2.32429	2.47998	2.49536	3.7606	4.60731	0.633996	-0.657453	0.0299512	down	no
ENSMUSG00000017754	Pltp	phospholipid transfer protein [Source:MGI Symbol;Acc:MGI:103151]	protein_coding;processed_transcript;retained_intron	24.4822	20.3388	21.1597	48.0632	25.9392	22.6364	0.682755	-0.550559	0.0299529	down	no
ENSMUSG00000076435	Acsf2	acyl-CoA synthetase family member 2 [Source:MGI Symbol;Acc:MGI:2388287]	protein_coding;processed_transcript	2.75137	2.66311	2.5657	5.19449	3.58855	3.10103	0.671503	-0.574534	0.0301535	down	no
ENSMUSG00000030055	Rab43	RAB43, member RAS oncogene family [Source:MGI Symbol;Acc:MGI:1917084]	protein_coding;processed_transcript	7.11785	6.24235	6.44042	9.66288	8.18452	8.55899	0.749842	-0.415342	0.0303345	down	no
ENSMUSG00000029223	Uchl1	ubiquitin carboxy-terminal hydrolase L1 [Source:MGI Symbol;Acc:MGI:103149]	retained_intron;protein_coding	1.80997	1.1786	1.31717	3.4526	1.87119	2.06106	0.58305	-0.778309	0.0303414	down	no
ENSMUSG00000064349	mt-Tc	mitochondrially encoded tRNA cysteine [Source:MGI Symbol;Acc:MGI:102490]	Mt_tRNA	45.6445	50.0442	50.7808	145.974	56.7924	57.4876	0.562794	-0.829322	0.0303801	down	no
ENSMUSG00000020629	Adi1	acireductone dioxygenase 1 [Source:MGI Symbol;Acc:MGI:2144929]	protein_coding;processed_transcript	8.8226	8.91655	7.84472	17.822	9.41564	10.5636	0.6768	-0.563198	0.0303802	down	no
ENSMUSG00000071540	3425401B19Rik	RIKEN cDNA 3425401B19 gene [Source:MGI Symbol;Acc:MGI:3588196]	protein_coding;processed_transcript	1.73694	1.97884	2.36774	3.43534	2.51723	2.83601	0.692207	-0.530724	0.0303845	down	no
ENSMUSG00000035561	Aldh1b1	aldehyde dehydrogenase 1 family, member B1 [Source:MGI Symbol;Acc:MGI:1919785]	protein_coding	0.208053	0.212903	0.160394	0.452374	0.454204	0.224789	0.513848	-0.960588	0.030558	down	no
ENSMUSG00000017724	Etv4	ets variant 4 [Source:MGI Symbol;Acc:MGI:99423]	processed_transcript;protein_coding	3.33908	2.92933	3.87394	5.90252	4.17501	4.65631	0.688371	-0.538741	0.0305605	down	no
ENSMUSG00000058624	Gda	guanine deaminase [Source:MGI Symbol;Acc:MGI:95678]	protein_coding;retained_intron	0.546081	0.735214	0.721161	0.961055	1.06524	1.07522	0.645636	-0.631206	0.0306499	down	no
ENSMUSG00000022500	Litaf	LPS-induced TN factor [Source:MGI Symbol;Acc:MGI:1929512]	protein_coding;processed_transcript;retained_intron	16.6135	16.6518	15.91	21.946	21.1005	20.7619	0.77067	-0.375814	0.0306597	down	no
ENSMUSG00000036098	Myrf	myelin regulatory factor [Source:MGI Symbol;Acc:MGI:2684944]	protein_coding;retained_intron	0.473018	0.482931	0.451022	0.619985	0.708426	0.836712	0.649835	-0.621855	0.0306963	down	no
ENSMUSG00000062380	Tubb3	tubulin, beta 3 class III [Source:MGI Symbol;Acc:MGI:107813]	protein_coding	26.6685	23.5202	22.48	39.9388	30.2147	28.0425	0.740037	-0.434331	0.0308725	down	no
ENSMUSG00000027694	Gm8325	predicted pseudogene 8325 [Source:MGI Symbol;Acc:MGI:3644852]	processed_transcript;transcribed_processed_pseudogene	19.2014	17.0235	22.6666	46.3765	24.6688	21.6622	0.635239	-0.654628	0.0309538	down	no
ENSMUSG00000022452	Smdt1	single-pass membrane protein with aspartate rich tail 1 [Source:MGI Symbol;Acc:MGI:1916279]	protein_coding;nonsense_mediated_decay;retained_intron;processed_transcript	29.6033	34.6725	22.2257	54.5514	35.1082	33.2796	0.703613	-0.507146	0.0313525	down	no
ENSMUSG00000038866	Zcchc2	zinc finger, CCHC domain containing 2 [Source:MGI Symbol;Acc:MGI:2444114]	protein_coding;nonsense_mediated_decay	1.11036	1.47795	0.999041	1.14404	2.52963	1.95782	0.637017	-0.650597	0.0314034	down	no
ENSMUSG00000030681	Mvp	major vault protein [Source:MGI Symbol;Acc:MGI:1925638]	protein_coding;retained_intron	18.3083	19.075	17.1738	27.5082	22.0128	22.3475	0.759123	-0.397594	0.0314832	down	no
ENSMUSG00000018707	Dync1h1	dynein cytoplasmic 1 heavy chain 1 [Source:MGI Symbol;Acc:MGI:103147]	protein_coding;retained_intron	24.9106	25.6386	29.1194	43.3625	29.4075	34.7484	0.740976	-0.432501	0.0315212	down	no
ENSMUSG00000040734	Ppp1r13l	protein phosphatase 1, regulatory subunit 13 like [Source:MGI Symbol;Acc:MGI:3525053]	protein_coding;processed_transcript	12.1114	8.13361	8.61669	25.2316	10.6378	9.83213	0.631526	-0.663086	0.0317467	down	no
ENSMUSG00000038545	Cul7	cullin 7 [Source:MGI Symbol;Acc:MGI:1913765]	protein_coding;retained_intron;nonsense_mediated_decay;processed_transcript	11.5566	11.1733	10.7467	21.2906	12.336	12.916	0.719267	-0.475401	0.0317775	down	no
ENSMUSG00000002250	Ppard	peroxisome proliferator activator receptor delta [Source:MGI Symbol;Acc:MGI:101884]	retained_intron;protein_coding;processed_transcript	1.83143	1.96043	2.27777	5.41142	2.1697	2.16191	0.622972	-0.682761	0.0318024	down	no
ENSMUSG00000022246	Rai14	retinoic acid induced 14 [Source:MGI Symbol;Acc:MGI:1922896]	protein_coding;processed_transcript;retained_intron	5.53401	7.05568	6.72819	10.0631	7.54124	8.35523	0.744153	-0.426329	0.0319378	down	no
ENSMUSG00000102918	Pcdhgc3	protocadherin gamma subfamily C, 3 [Source:MGI Symbol;Acc:MGI:1935201]	protein_coding;nonsense_mediated_decay;retained_intron	35.3572	35.4328	38.8753	70.611	39.9311	42.6749	0.715752	-0.482468	0.0320955	down	no
ENSMUSG00000095762	Gm16378	predicted gene 16378 [Source:MGI Symbol;Acc:MGI:3646886]	processed_pseudogene	8.03421	6.90494	6.78311	17.3621	11.636	7.87755	0.589068	-0.763493	0.0321636	down	no
ENSMUSG00000026478	Lamc1	laminin, gamma 1 [Source:MGI Symbol;Acc:MGI:99914]	protein_coding;retained_intron;nonsense_mediated_decay	22.666	23.6413	24.9117	29.1511	31.3137	31.4687	0.77468	-0.368327	0.0322761	down	no
ENSMUSG00000036606	Plxnb2	plexin B2 [Source:MGI Symbol;Acc:MGI:2154239]	protein_coding;processed_transcript;retained_intron	38.003	38.6316	38.6985	63.5497	43.8293	47.3272	0.745497	-0.423725	0.0323303	down	no
ENSMUSG00000039376	Synpo2l	synaptopodin 2-like [Source:MGI Symbol;Acc:MGI:1916010]	protein_coding	62.2668	55.128	54.4484	97.0499	70.8733	64.3966	0.739684	-0.435019	0.0323537	down	no
ENSMUSG00000031026	Trim66	tripartite motif-containing 66 [Source:MGI Symbol;Acc:MGI:2152406]	protein_coding;processed_transcript	0.0733842	0.063482	0.0646577	0.0739735	0.129882	0.177231	0.528814	-0.919167	0.0325355	down	no
ENSMUSG00000001604	Tcea3	transcription elongation factor A (SII), 3 [Source:MGI Symbol;Acc:MGI:1196908]	protein_coding;processed_transcript	2.85677	2.02219	2.34604	6.52478	3.05676	2.83682	0.5818	-0.781406	0.0325665	down	no
ENSMUSG00000039477	Tnrc18	trinucleotide repeat containing 18 [Source:MGI Symbol;Acc:MGI:3648294]	protein_coding;processed_transcript;retained_intron	4.76357	4.23374	4.56303	6.80797	5.62741	5.46541	0.757528	-0.40063	0.0326625	down	no
ENSMUSG00000055407	Map6	microtubule-associated protein 6 [Source:MGI Symbol;Acc:MGI:1201690]	protein_coding;retained_intron;processed_transcript	6.86097	6.71875	6.56969	9.55611	8.0596	8.66213	0.766783	-0.383109	0.0327585	down	no
ENSMUSG00000040761	Spen	spen family transcription repressor [Source:MGI Symbol;Acc:MGI:1891706]	protein_coding;processed_transcript	2.15501	1.97494	2.36893	3.82531	2.64875	2.52741	0.72198	-0.469969	0.0328618	down	no
ENSMUSG00000026278	Bok	BCL2-related ovarian killer [Source:MGI Symbol;Acc:MGI:1858494]	protein_coding;processed_transcript	15.3469	12.8122	12.9179	25.9473	16.9308	15.337	0.705608	-0.503062	0.0336051	down	no
ENSMUSG00000021273	Fdft1	farnesyl diphosphate farnesyl transferase 1 [Source:MGI Symbol;Acc:MGI:102706]	protein_coding;nonsense_mediated_decay;retained_intron	13.2524	20.4522	19.0384	22.4426	22.5453	25.6447	0.746725	-0.421351	0.033877	down	no
ENSMUSG00000029166	Mapre3	microtubule-associated protein, RP/EB family, member 3 [Source:MGI Symbol;Acc:MGI:2140967]	protein_coding;retained_intron	13.4132	12.3085	12.9175	24.3866	14.8574	14.3434	0.721053	-0.471823	0.0342306	down	no
ENSMUSG00000026288	Inpp5d	inositol polyphosphate-5-phosphatase D [Source:MGI Symbol;Acc:MGI:107357]	protein_coding;processed_transcript;nonsense_mediated_decay;retained_intron	0.100101	0.0557278	0.056296	0.126367	0.112549	0.155919	0.537249	-0.896336	0.0346776	down	no
ENSMUSG00000035279	Ssc5d	scavenger receptor cysteine rich family, 5 domains [Source:MGI Symbol;Acc:MGI:3606211]	protein_coding;retained_intron	11.2349	10.707	11.0082	17.5368	12.6677	13.6419	0.75149	-0.412174	0.0347674	down	no
ENSMUSG00000027611	Procr	protein C receptor, endothelial [Source:MGI Symbol;Acc:MGI:104596]	protein_coding;processed_transcript;retained_intron	0.584153	0.445481	0.553484	0.888194	0.942759	0.87166	0.585774	-0.771585	0.0348514	down	no
ENSMUSG00000103823	Gm7899	predicted gene 7899 [Source:MGI Symbol;Acc:MGI:3645044]	processed_pseudogene	3.37943	3.11431	2.47018	4.91926	4.68406	3.88046	0.664793	-0.589024	0.0351989	down	no
ENSMUSG00000025178	Pi4k2a	phosphatidylinositol 4-kinase type 2 alpha [Source:MGI Symbol;Acc:MGI:1934031]	nonsense_mediated_decay;protein_coding;retained_intron	2.97466	3.56486	3.20218	2.95863	3.67465	8.82092	0.630359	-0.665754	0.0352311	down	no
ENSMUSG00000021061	Sptb	spectrin beta, erythrocytic [Source:MGI Symbol;Acc:MGI:98387]	protein_coding;retained_intron	0.0443989	0.0384776	0.0482555	0.0927853	0.0625112	0.0807638	0.555502	-0.848136	0.0352848	down	no
ENSMUSG00000026854	Usp20	ubiquitin specific peptidase 20 [Source:MGI Symbol;Acc:MGI:1921520]	protein_coding;retained_intron;processed_transcript	2.42624	4.23078	2.61076	3.4845	4.53578	5.14933	0.703725	-0.506916	0.0353212	down	no
ENSMUSG00000050212	Eva1b	eva-1 homolog B (C. elegans) [Source:MGI Symbol;Acc:MGI:1922063]	protein_coding	2.73367	2.65145	1.50684	5.31391	3.01634	3.03775	0.60626	-0.721992	0.0353423	down	no
ENSMUSG00000037174	Elf2	E74-like factor 2 [Source:MGI Symbol;Acc:MGI:1916507]	protein_coding;nonsense_mediated_decay;processed_transcript;retained_intron	2.77968	3.88196	2.50466	3.70161	4.59887	4.2529	0.730185	-0.453666	0.0355541	down	no
ENSMUSG00000001123	Lgals9	lectin, galactose binding, soluble 9 [Source:MGI Symbol;Acc:MGI:109496]	protein_coding;retained_intron	15.7533	15.3135	17.1988	22.5826	19.1747	22.0826	0.756043	-0.403461	0.0359861	down	no
ENSMUSG00000068794	Col28a1	collagen, type XXVIII, alpha 1 [Source:MGI Symbol;Acc:MGI:2685312]	protein_coding;retained_intron;processed_transcript	1.14825	1.27348	1.19112	1.12853	1.92215	2.69121	0.629211	-0.668383	0.0360058	down	no
ENSMUSG00000040139	9430038I01Rik	RIKEN cDNA 9430038I01 gene [Source:MGI Symbol;Acc:MGI:1924502]	protein_coding;processed_transcript;retained_intron	0.20544	0.210461	0.159652	0.320644	0.325186	0.336448	0.585937	-0.771183	0.036168	down	no
ENSMUSG00000043518	Rai2	retinoic acid induced 2 [Source:MGI Symbol;Acc:MGI:1344378]	protein_coding	0.220217	0.0923956	0.183963	0.485224	0.43282	0.143657	0.467716	-1.09629	0.0363547	down	yes
ENSMUSG00000021451	Sema4d	sema domain, immunoglobulin domain (Ig), transmembrane domain (TM) and short cytoplasmic domain, (semaphorin) 4D [Source:MGI Symbol;Acc:MGI:109244]	protein_coding;processed_transcript;retained_intron	2.79683	2.58098	2.55722	4.62419	3.05354	3.30471	0.72252	-0.468891	0.0364595	down	no
ENSMUSG00000040010	Slc7a5	solute carrier family 7 (cationic amino acid transporter, y+ system), member 5 [Source:MGI Symbol;Acc:MGI:1298205]	protein_coding;retained_intron;processed_transcript	60.6958	51.2849	52.1392	112.188	63.6325	56.6034	0.706122	-0.50201	0.0364925	down	no
ENSMUSG00000035722	Abca7	ATP-binding cassette, sub-family A (ABC1), member 7 [Source:MGI Symbol;Acc:MGI:1351646]	protein_coding	4.03893	4.14066	4.50964	6.9612	4.98794	5.26394	0.737185	-0.439901	0.0367097	down	no
ENSMUSG00000030879	Mrpl17	mitochondrial ribosomal protein L17 [Source:MGI Symbol;Acc:MGI:1351608]	protein_coding;nonsense_mediated_decay	8.17061	3.2614	4.42777	10.664	7.16681	6.29997	0.657242	-0.605503	0.0368017	down	no
ENSMUSG00000064347	mt-Ta	mitochondrially encoded tRNA alanine [Source:MGI Symbol;Acc:MGI:102491]	Mt_tRNA	81.2406	86.654	82.2288	237.636	95.0615	88.5838	0.593721	-0.752142	0.0368277	down	no
ENSMUSG00000051343	Rab11fip5	RAB11 family interacting protein 5 (class I) [Source:MGI Symbol;Acc:MGI:1098586]	protein_coding;processed_transcript	11.0902	9.77161	10.137	17.0639	11.6254	12.6293	0.750238	-0.414579	0.0368749	down	no
ENSMUSG00000036959	Bcorl1	BCL6 co-repressor-like 1 [Source:MGI Symbol;Acc:MGI:2443910]	protein_coding;nonsense_mediated_decay;processed_transcript	2.01342	1.87197	1.97595	3.71089	2.38473	2.21463	0.705315	-0.503661	0.0369673	down	no
ENSMUSG00000055027	Smyd1	SET and MYND domain containing 1 [Source:MGI Symbol;Acc:MGI:104790]	protein_coding	15.2639	16.6697	16.1503	26.0039	18.7774	19.0087	0.753787	-0.407772	0.037131	down	no
ENSMUSG00000061167	Rpl15-ps3	ribosomal protein L15, pseudogene 3 [Source:MGI Symbol;Acc:MGI:3782952]	processed_pseudogene	31.9789	32.05	50.9681	94.7733	34.8024	51.5515	0.634897	-0.655406	0.0372403	down	no
ENSMUSG00000090489	Gm17415	predicted gene, 17415 [Source:MGI Symbol;Acc:MGI:4937049]	processed_pseudogene	2.11002	1.30565	1.5014	5.17571	2.45357	1.66926	0.528801	-0.919204	0.0373043	down	no
ENSMUSG00000066975	Cryba4	crystallin, beta A4 [Source:MGI Symbol;Acc:MGI:102716]	protein_coding	2.9126	2.36466	2.01038	6.24981	2.67718	3.76805	0.574054	-0.800741	0.0374395	down	no
ENSMUSG00000003348	Mob3a	MOB kinase activator 3A [Source:MGI Symbol;Acc:MGI:3050117]	protein_coding;processed_transcript	10.2859	9.71308	8.87035	15.8657	12.188	11.0067	0.739093	-0.436171	0.0375108	down	no
ENSMUSG00000023885	Thbs2	thrombospondin 2 [Source:MGI Symbol;Acc:MGI:98738]	protein_coding;retained_intron	17.9223	20.4963	20.5492	20.4154	26.821	29.5872	0.767573	-0.381625	0.0375296	down	no
ENSMUSG00000104802	Gm5869	predicted gene 5869 [Source:MGI Symbol;Acc:MGI:3648808]	processed_pseudogene	5.59512	5.10338	7.44716	10.0205	6.49875	10.9226	0.661241	-0.596751	0.0376047	down	no
ENSMUSG00000028843	Sh3bgrl3	SH3 domain binding glutamic acid-rich protein-like 3 [Source:MGI Symbol;Acc:MGI:1920973]	protein_coding;retained_intron	95.0163	83.4759	79.7126	189.204	93.208	90.837	0.691777	-0.531622	0.0376263	down	no
ENSMUSG00000037235	Mxd4	Max dimerization protein 4 [Source:MGI Symbol;Acc:MGI:104991]	protein_coding;retained_intron;processed_transcript	6.28143	6.45568	12.8723	18.5143	7.47533	14.1076	0.638683	-0.646828	0.0376493	down	no
ENSMUSG00000043822	Adamtsl5	ADAMTS-like 5 [Source:MGI Symbol;Acc:MGI:1913798]	retained_intron;protein_coding;processed_transcript	10.7482	9.28478	9.68509	16.1417	11.5092	11.957	0.750307	-0.414447	0.0376754	down	no
ENSMUSG00000051375	Pcdh1	protocadherin 1 [Source:MGI Symbol;Acc:MGI:104692]	protein_coding	7.09535	6.04733	6.77118	13.6807	6.92652	7.55673	0.70707	-0.500075	0.0379259	down	no
ENSMUSG00000027223	Mapk8ip1	mitogen-activated protein kinase 8 interacting protein 1 [Source:MGI Symbol;Acc:MGI:1309464]	protein_coding;processed_transcript	8.14984	7.17908	6.86609	15.4194	8.45239	7.86519	0.699342	-0.51593	0.0382305	down	no
ENSMUSG00000097055	Gm4419	predicted gene 4419 [Source:MGI Symbol;Acc:MGI:3782604]	antisense	0.222228	0.267509	0.14117	0.348411	0.378377	0.406946	0.556486	-0.845581	0.038258	down	no
ENSMUSG00000036985	Zdhhc9	zinc finger, DHHC domain containing 9 [Source:MGI Symbol;Acc:MGI:2444393]	retained_intron;protein_coding;processed_transcript	5.56605	5.6379	6.3772	9.052	7.41693	6.83453	0.754444	-0.406515	0.0382739	down	no
ENSMUSG00000024205	Rpl36-ps2	ribosomal protein L36, pseudogene 2 [Source:MGI Symbol;Acc:MGI:3650081]	processed_pseudogene	4.69453	4.57705	4.61269	10.6329	6.28589	6.69353	0.588009	-0.766089	0.0382775	down	no
ENSMUSG00000025784	Clec3b	C-type lectin domain family 3, member b [Source:MGI Symbol;Acc:MGI:104540]	protein_coding	0.453549	0.410893	0.454431	1.32248	0.966062	0.370424	0.49601	-1.01156	0.0384839	down	yes
ENSMUSG00000076137	Gm26384	predicted gene, 26384 [Source:MGI Symbol;Acc:MGI:5456161]	miRNA	15.1258	9.91039	12.4313	26.8211	23.8985	14.4039	0.57533	-0.797538	0.03856	down	no
ENSMUSG00000117813	AC127331	ADP-ribosylation factor 3 (Arf3), pseudogene	processed_pseudogene	0.975895	1.12448	1.39654	2.33866	1.89355	1.92808	0.567655	-0.816914	0.0386472	down	no
ENSMUSG00000042423	Fbrs	fibrosin [Source:MGI Symbol;Acc:MGI:104648]	protein_coding;retained_intron;processed_transcript	6.34891	4.94936	3.8013	11.2169	8.11163	4.0442	0.646035	-0.630316	0.0389021	down	no
ENSMUSG00000020211	Sf3a2	splicing factor 3a, subunit 2 [Source:MGI Symbol;Acc:MGI:104912]	protein_coding;retained_intron	16.4607	13.367	13.9734	37.0374	14.6737	15.197	0.654645	-0.611216	0.0389834	down	no
ENSMUSG00000037012	Hk1	hexokinase 1 [Source:MGI Symbol;Acc:MGI:96103]	protein_coding;retained_intron	9.54797	14.4146	10.8239	14.6981	15.1283	15.9263	0.760313	-0.395334	0.0391153	down	no
ENSMUSG00000027546	Atp9a	ATPase, class II, type 9A [Source:MGI Symbol;Acc:MGI:1330826]	protein_coding;retained_intron;processed_transcript	0.435995	0.408483	0.477708	1.2342	0.588283	0.458551	0.579643	-0.786764	0.0391716	down	no
ENSMUSG00000108732	2310043P16Rik	RIKEN cDNA 2310043P16 gene [Source:MGI Symbol;Acc:MGI:1917385]	TEC	0.369193	0.22041	0.42749	0.747408	0.520192	0.504756	0.573865	-0.801217	0.0393928	down	no
ENSMUSG00000105361	AY036118	cDNA sequence AY036118 [Source:MGI Symbol;Acc:MGI:2158419]	lincRNA	243.848	212.126	214.363	368.71	268.521	252.349	0.753544	-0.408236	0.0396149	down	no
ENSMUSG00000055485	Soga1	suppressor of glucose, autophagy associated 1 [Source:MGI Symbol;Acc:MGI:2444575]	protein_coding;processed_transcript	2.79873	2.4166	3.12782	5.10307	3.194	3.3465	0.716546	-0.480869	0.0396724	down	no
ENSMUSG00000025366	Esyt1	extended synaptotagmin-like protein 1 [Source:MGI Symbol;Acc:MGI:1344426]	protein_coding;retained_intron;nonsense_mediated_decay	20.7326	19.6096	19.63	30.3048	23.0402	24.7496	0.767943	-0.380928	0.0397046	down	no
ENSMUSG00000032875	Arhgef17	Rho guanine nucleotide exchange factor (GEF) 17 [Source:MGI Symbol;Acc:MGI:2673002]	protein_coding;retained_intron	8.02255	7.64527	7.6592	11.0404	9.09806	9.93626	0.775635	-0.366551	0.0398124	down	no
ENSMUSG00000006403	Adamts4	a disintegrin-like and metallopeptidase (reprolysin type) with thrombospondin type 1 motif, 4 [Source:MGI Symbol;Acc:MGI:1339949]	protein_coding	13.8121	12.5636	13.7254	15.9658	18.2475	16.9874	0.783213	-0.352523	0.0398543	down	no
ENSMUSG00000026879	Gsn	gelsolin [Source:MGI Symbol;Acc:MGI:95851]	protein_coding;retained_intron	96.7583	89.0588	89.6959	135.085	109.469	112.649	0.771306	-0.374625	0.0399133	down	no
ENSMUSG00000062077	Trim54	tripartite motif-containing 54 [Source:MGI Symbol;Acc:MGI:1889623]	protein_coding	36.3854	29.8718	28.3567	63.3935	36.9893	32.817	0.710315	-0.493468	0.0401969	down	no
ENSMUSG00000031015	Swap70	SWA-70 protein [Source:MGI Symbol;Acc:MGI:1298390]	retained_intron;protein_coding	4.04417	4.09899	4.52869	4.22169	6.39098	6.30867	0.748868	-0.417218	0.0402683	down	no
ENSMUSG00000027712	Anxa5	annexin A5 [Source:MGI Symbol;Acc:MGI:106008]	protein_coding;retained_intron	133.534	137.766	138.043	183.143	167.227	173.337	0.781625	-0.355451	0.0406742	down	no
ENSMUSG00000084817	Gm5526	predicted pseudogene 5526 [Source:MGI Symbol;Acc:MGI:3643066]	processed_pseudogene	4.82697	8.45434	8.13918	11.2518	10.4605	12.1362	0.632832	-0.660106	0.0415703	down	no
ENSMUSG00000027803	Wwtr1	WW domain containing transcription regulator 1 [Source:MGI Symbol;Acc:MGI:1917649]	protein_coding	52.9714	30.0418	29.1875	49.3793	52.2667	51.119	0.734466	-0.445233	0.0415769	down	no
ENSMUSG00000102692	Dchs2	dachsous cadherin related 2 [Source:MGI Symbol;Acc:MGI:2685263]	protein_coding	0.165327	0.146583	0.197855	0.208735	0.315741	0.311102	0.610075	-0.712942	0.0416593	down	no
ENSMUSG00000013921	Clip3	CAP-GLY domain containing linker protein 3 [Source:MGI Symbol;Acc:MGI:1923936]	protein_coding;retained_intron	7.54473	7.23685	6.73376	14.3831	8.30795	7.68127	0.708387	-0.49739	0.0417189	down	no
ENSMUSG00000004677	Myo9b	myosin IXb [Source:MGI Symbol;Acc:MGI:106624]	protein_coding;processed_transcript	10.338	10.6018	11.1089	15.7629	12.1532	13.6458	0.771106	-0.374999	0.041743	down	no
ENSMUSG00000071176	Arhgef10	Rho guanine nucleotide exchange factor (GEF) 10 [Source:MGI Symbol;Acc:MGI:2444453]	protein_coding;retained_intron;processed_transcript	4.54656	4.86671	5.04475	6.03392	6.24589	6.27735	0.779108	-0.360105	0.0418014	down	no
ENSMUSG00000028080	Lrba	LPS-responsive beige-like anchor [Source:MGI Symbol;Acc:MGI:1933162]	protein_coding;retained_intron	0.942906	1.0418	1.47257	1.31238	1.54978	1.91385	0.723884	-0.46617	0.0418974	down	no
ENSMUSG00000000359	Rem1	rad and gem related GTP binding protein 1 [Source:MGI Symbol;Acc:MGI:1097696]	protein_coding;retained_intron	7.25859	5.71681	6.83697	9.32402	8.78171	8.87498	0.734316	-0.445526	0.0420294	down	no
ENSMUSG00000002812	Flii	flightless I actin binding protein [Source:MGI Symbol;Acc:MGI:1342286]	protein_coding;retained_intron	41.0322	41.2513	40.6985	59.3674	46.8047	52.3508	0.7758	-0.366244	0.0420529	down	no
ENSMUSG00000027540	Ptpn1	protein tyrosine phosphatase, non-receptor type 1 [Source:MGI Symbol;Acc:MGI:97805]	protein_coding;processed_transcript	10.3805	9.84055	10.201	16.5767	12.3847	11.2337	0.75686	-0.401903	0.0422484	down	no
ENSMUSG00000027575	Arfgap1	ADP-ribosylation factor GTPase activating protein 1 [Source:MGI Symbol;Acc:MGI:2183559]	protein_coding;retained_intron;processed_transcript	9.65251	7.11607	9.60485	10.6902	9.78332	14.7696	0.748328	-0.418257	0.042555	down	no
ENSMUSG00000051650	B3gnt2	UDP-GlcNAc:betaGal beta-1,3-N-acetylglucosaminyltransferase 2 [Source:MGI Symbol;Acc:MGI:1889505]	protein_coding;processed_transcript	11.1806	12.1285	11.3684	13.3438	16.1719	14.9246	0.780317	-0.357867	0.0425631	down	no
ENSMUSG00000030592	Ryr1	ryanodine receptor 1, skeletal muscle [Source:MGI Symbol;Acc:MGI:99659]	protein_coding;retained_intron	12.9633	10.5048	12.716	21.2481	13.612	13.8992	0.742095	-0.430323	0.0425706	down	no
ENSMUSG00000051985	Igfn1	immunoglobulin-like and fibronectin type III domain containing 1 [Source:MGI Symbol;Acc:MGI:3045352]	protein_coding;nonsense_mediated_decay	2.71604	2.52089	2.94915	3.02157	3.46482	4.50576	0.74472	-0.42523	0.0429304	down	no
ENSMUSG00000022377	Asap1	ArfGAP with SH3 domain, ankyrin repeat and PH domain1 [Source:MGI Symbol;Acc:MGI:1342335]	protein_coding;processed_transcript;retained_intron	18.6141	16.0979	17.8476	21.1883	23.2637	22.3414	0.786898	-0.345751	0.0431356	down	no
ENSMUSG00000040690	Col16a1	collagen, type XVI, alpha 1 [Source:MGI Symbol;Acc:MGI:1095396]	processed_transcript;protein_coding;nonsense_mediated_decay;retained_intron	5.43215	5.56732	6.03572	7.27337	7.30225	7.37727	0.775988	-0.365893	0.0431772	down	no
ENSMUSG00000072978	Gm5830	predicted pseudogene 5830 [Source:MGI Symbol;Acc:MGI:3647375]	processed_pseudogene	0.786473	1.31786	1.35986	2.60591	2.74532	1.19235	0.529402	-0.917565	0.0432435	down	no
ENSMUSG00000085133	B930095G15Rik	RIKEN cDNA B930095G15 gene [Source:MGI Symbol;Acc:MGI:2443701]	sense_intronic	0.788743	0.569999	0.839259	1.1699	1.04198	1.1487	0.654053	-0.612519	0.0433055	down	no
ENSMUSG00000109933	Gm7600	predicted gene 7600 [Source:MGI Symbol;Acc:MGI:3647502]	processed_pseudogene	2.23052	2.34064	2.0938	4.32376	4.62557	2.27899	0.593585	-0.752474	0.0434648	down	no
ENSMUSG00000027230	Creb3l1	cAMP responsive element binding protein 3-like 1 [Source:MGI Symbol;Acc:MGI:1347062]	protein_coding	76.3738	70.0183	68.2572	152.451	80.583	71.2031	0.705532	-0.503216	0.0435256	down	no
ENSMUSG00000020456	Ogdh	oxoglutarate (alpha-ketoglutarate) dehydrogenase (lipoamide) [Source:MGI Symbol;Acc:MGI:1098267]	protein_coding;retained_intron	34.5039	32.4616	31.1186	60.5316	35.8	36.7043	0.737275	-0.439725	0.043552	down	no
ENSMUSG00000026833	Olfm1	olfactomedin 1 [Source:MGI Symbol;Acc:MGI:1860437]	protein_coding;processed_transcript	29.8447	28.1347	28.1698	43.8424	34.9122	32.9605	0.771151	-0.374914	0.0435614	down	no
ENSMUSG00000006517	Mvd	mevalonate (diphospho) decarboxylase [Source:MGI Symbol;Acc:MGI:2179327]	protein_coding;nonsense_mediated_decay	10.0289	8.12296	9.32741	15.3007	9.7846	12.8147	0.725048	-0.463851	0.0437206	down	no
ENSMUSG00000019066	Rab3d	RAB3D, member RAS oncogene family [Source:MGI Symbol;Acc:MGI:97844]	protein_coding;retained_intron	4.39002	4.62291	4.51484	7.44772	5.4075	5.47962	0.737817	-0.438665	0.0440663	down	no
ENSMUSG00000029816	Gpnmb	glycoprotein (transmembrane) nmb [Source:MGI Symbol;Acc:MGI:1934765]	protein_coding;retained_intron;nonsense_mediated_decay	0.109303	0.0624463	0.0681637	0.151404	0.168199	0.113779	0.553584	-0.853127	0.0440741	down	no
ENSMUSG00000035863	Palm	paralemmin [Source:MGI Symbol;Acc:MGI:1261814]	protein_coding;processed_transcript	16.8601	14.0694	13.749	31.205	16.8954	14.9049	0.709124	-0.49589	0.0444421	down	no
ENSMUSG00000031604	Msmo1	methylsterol monoxygenase 1 [Source:MGI Symbol;Acc:MGI:1913484]	retained_intron;protein_coding;processed_transcript	9.56404	10.2432	9.98004	11.1234	13.4645	13.3379	0.785408	-0.348486	0.0444676	down	no
ENSMUSG00000037003	Tns2	tensin 2 [Source:MGI Symbol;Acc:MGI:2387586]	retained_intron;protein_coding	27.5703	24.413	26.1739	34.6552	30.0401	35.0043	0.783928	-0.351207	0.0445096	down	no
ENSMUSG00000041577	Prelp	proline arginine-rich end leucine-rich repeat [Source:MGI Symbol;Acc:MGI:2151110]	protein_coding;processed_transcript	24.4404	22.1851	24.1811	39.8781	26.221	27.5698	0.755924	-0.403688	0.0447262	down	no
ENSMUSG00000062758	Gm16477	predicted pseudogene 16477 [Source:MGI Symbol;Acc:MGI:3646779]	processed_pseudogene	20.8298	12.6763	8.10597	39.1907	6.71102	33.294	0.525434	-0.928418	0.0450321	down	no
ENSMUSG00000042622	Maff	v-maf musculoaponeurotic fibrosarcoma oncogene family, protein F (avian) [Source:MGI Symbol;Acc:MGI:96910]	protein_coding	8.5729	6.70691	6.39109	10.1009	9.47335	9.47196	0.746083	-0.422593	0.0450344	down	no
ENSMUSG00000015957	Wnt11	wingless-type MMTV integration site family, member 11 [Source:MGI Symbol;Acc:MGI:101948]	protein_coding;nonsense_mediated_decay;processed_transcript	0.778292	0.846142	0.880555	1.35325	1.13051	1.28851	0.664054	-0.590627	0.0450474	down	no
ENSMUSG00000022335	Zfat	zinc finger and AT hook domain containing [Source:MGI Symbol;Acc:MGI:2681865]	protein_coding;processed_transcript;retained_intron	0.618103	0.808022	0.60146	1.05825	0.808012	1.17864	0.665895	-0.586633	0.0453761	down	no
ENSMUSG00000049134	Nrap	nebulin-related anchoring protein [Source:MGI Symbol;Acc:MGI:1098765]	protein_coding;nonsense_mediated_decay	8.35519	8.85884	9.46846	13.1065	10.1407	11.3716	0.770752	-0.375661	0.0453772	down	no
ENSMUSG00000003378	Grik5	glutamate receptor, ionotropic, kainate 5 (gamma 2) [Source:MGI Symbol;Acc:MGI:95818]	protein_coding;nonsense_mediated_decay;retained_intron;processed_transcript	3.379	2.67719	2.87885	5.71573	3.18367	3.75415	0.706129	-0.501997	0.0459349	down	no
ENSMUSG00000018398	Sept8	septin 8 [Source:MGI Symbol;Acc:MGI:894310]	protein_coding;processed_transcript	20.7877	21.1738	21.7982	27.1012	26.063	27.463	0.790796	-0.338623	0.0459375	down	no
ENSMUSG00000029720	Gm20605	predicted gene 20605 [Source:MGI Symbol;Acc:MGI:5306917]	nonsense_mediated_decay	1.45667	5.54907	3.73083	8.08777	5.01922	4.61676	0.605773	-0.72315	0.0463618	down	no
ENSMUSG00000020135	Apc2	adenomatosis polyposis coli 2 [Source:MGI Symbol;Acc:MGI:1346052]	protein_coding;retained_intron	0.147753	0.131567	0.162365	0.364485	0.193426	0.1905	0.590164	-0.760813	0.0468373	down	no
ENSMUSG00000002831	Plin4	perilipin 4 [Source:MGI Symbol;Acc:MGI:1929709]	protein_coding	0.153965	0.107854	0.11262	0.177549	0.243973	0.221223	0.582562	-0.779516	0.046873	down	no
ENSMUSG00000005442	Cic	capicua transcriptional repressor [Source:MGI Symbol;Acc:MGI:1918972]	protein_coding;retained_intron;processed_transcript	5.87964	4.9461	5.03387	9.63458	5.50871	6.32404	0.738779	-0.436786	0.0469769	down	no
ENSMUSG00000027341	Tmem230	transmembrane protein 230 [Source:MGI Symbol;Acc:MGI:1917862]	protein_coding;retained_intron;processed_transcript	10.2405	3.20778	3.33072	7.98318	10.2947	8.81167	0.619389	-0.691081	0.0469873	down	no
ENSMUSG00000030587	2200002D01Rik	RIKEN cDNA 2200002D01 gene [Source:MGI Symbol;Acc:MGI:1919525]	retained_intron;protein_coding	11.0649	8.31575	8.72784	18.0668	11.3957	10.4488	0.704275	-0.505789	0.047137	down	no
ENSMUSG00000020773	Trim47	tripartite motif-containing 47 [Source:MGI Symbol;Acc:MGI:1917374]	protein_coding;processed_transcript	7.61753	7.27372	6.17291	14.027	8.36646	7.438	0.706105	-0.502044	0.0472663	down	no
ENSMUSG00000027737	Slc7a11	solute carrier family 7 (cationic amino acid transporter, y+ system), member 11 [Source:MGI Symbol;Acc:MGI:1347355]	protein_coding;processed_transcript;retained_intron	5.54703	5.2421	5.08196	9.19595	5.82105	6.05812	0.753072	-0.40914	0.0476828	down	no
ENSMUSG00000094683	Ap3m1-ps	adaptor-related protein complex 3, mu 1 subunit, pseudogene [Source:MGI Symbol;Acc:MGI:3645307]	processed_pseudogene	0.169979	0.321776	0.629793	0.536964	0.754783	0.920351	0.507006	-0.979924	0.0479784	down	no
ENSMUSG00000080054	Rpl12-ps1	ribosomal protein L12, pseudogene 1 [Source:MGI Symbol;Acc:MGI:3646154]	processed_pseudogene	3.68191	2.70431	2.01148	8.58261	3.9293	2.88551	0.545396	-0.874624	0.0484034	down	no
ENSMUSG00000068120	Gm10231	predicted pseudogene 10231 [Source:MGI Symbol;Acc:MGI:3704468]	processed_pseudogene	24.2192	19.2122	18.7763	37.3506	19.9644	33.5867	0.68434	-0.547215	0.0484917	down	no
ENSMUSG00000029468	P2rx7	purinergic receptor P2X, ligand-gated ion channel, 7 [Source:MGI Symbol;Acc:MGI:1339957]	protein_coding;retained_intron;processed_transcript	1.12793	1.89465	1.34369	1.70441	1.867	2.87865	0.676937	-0.562907	0.0485774	down	no
ENSMUSG00000024327	Slc39a7	solute carrier family 39 (zinc transporter), member 7 [Source:MGI Symbol;Acc:MGI:95909]	retained_intron;protein_coding;processed_transcript	35.0623	36.2855	41.809	68.7521	46.841	37.3968	0.739636	-0.435113	0.0486106	down	no
ENSMUSG00000009470	Tnpo1	transportin 1 [Source:MGI Symbol;Acc:MGI:2681523]	protein_coding;retained_intron	3.05528	3.32727	4.42076	2.54701	3.27939	14.06	0.54325	-0.880311	0.0487535	down	no
ENSMUSG00000039191	Rbpj	recombination signal binding protein for immunoglobulin kappa J region [Source:MGI Symbol;Acc:MGI:96522]	protein_coding;retained_intron;processed_transcript	2.19378	1.84402	2.56758	3.92458	2.76165	2.37498	0.728972	-0.456065	0.0488366	down	no
ENSMUSG00000025477	Inpp5a	inositol polyphosphate-5-phosphatase A [Source:MGI Symbol;Acc:MGI:2686961]	protein_coding;processed_transcript;retained_intron	6.59294	5.86224	4.13797	9.67671	6.66383	6.43137	0.728668	-0.456667	0.0488373	down	no
ENSMUSG00000039787	Cercam	cerebral endothelial cell adhesion molecule [Source:MGI Symbol;Acc:MGI:2139134]	protein_coding;retained_intron	15.9342	13.5147	13.7619	19.8617	17.899	17.5487	0.781257	-0.356131	0.0489457	down	no
ENSMUSG00000025185	Loxl4	lysyl oxidase-like 4 [Source:MGI Symbol;Acc:MGI:1914823]	protein_coding;processed_transcript	4.05503	3.84343	4.50589	5.2218	5.46204	5.74551	0.755011	-0.40543	0.0489642	down	no
ENSMUSG00000045039	Megf8	multiple EGF-like-domains 8 [Source:MGI Symbol;Acc:MGI:2446294]	protein_coding;retained_intron	11.4615	11.1204	11.2503	21.9744	11.7831	12.4667	0.731917	-0.450248	0.0490259	down	no
ENSMUSG00000026167	Wnt10a	wingless-type MMTV integration site family, member 10A [Source:MGI Symbol;Acc:MGI:108071]	protein_coding	10.9709	8.98976	7.79718	17.6349	10.1405	10.9621	0.716563	-0.480835	0.0490677	down	no
ENSMUSG00000026924	Sec16a	SEC16 homolog A, endoplasmic reticulum export factor [Source:MGI Symbol;Acc:MGI:2139207]	processed_transcript;protein_coding	6.13191	9.29984	8.3875	11.0569	8.81852	11.4756	0.759761	-0.396383	0.0494394	down	no
ENSMUSG00000078300	Gm2606	predicted pseudogene 2606 [Source:MGI Symbol;Acc:MGI:3780774]	processed_pseudogene	191.831	234.143	89.8561	343.761	213.78	207.179	0.674536	-0.568033	0.0494512	down	no
ENSMUSG00000074516	Gm10709	predicted gene 10709 [Source:MGI Symbol;Acc:MGI:3642754]	processed_pseudogene	1.78902	1.30803	0.905468	3.32281	1.93745	1.9285	0.556773	-0.844838	0.0495594	down	no
ENSMUSG00000031824	6430548M08Rik	RIKEN cDNA 6430548M08 gene [Source:MGI Symbol;Acc:MGI:2443793]	protein_coding;processed_transcript;retained_intron	2.00128	4.3811	2.20928	5.3399	4.37121	3.10817	0.670214	-0.577306	0.0496598	down	no
ENSMUSG00000032562	Gnai2	guanine nucleotide binding protein (G protein), alpha inhibiting 2 [Source:MGI Symbol;Acc:MGI:95772]	protein_coding;retained_intron	93.9024	84.7407	83.0787	162.419	96.8077	94.33	0.740255	-0.433906	0.0498158	down	no
Theobromine vs CK
gene_id	gene_name	Description	trans_type	FPKM.Theobromine1	FPKM.Theobromine2	FPKM.Theobromine3	FPKM.Control1	FPKM.Control2	FPKM.Control3	fc	log2(fc)	pval	regulation	significant
ENSMUSG00000037211	Spry1	sprouty RTK signaling antagonist 1 [Source:MGI Symbol;Acc:MGI:1345139]	protein_coding	7.7195	7.07	7.40372	0.0212375	0.00204778	0.03265	396.766	8.63214	6.60876e-75	up	yes
ENSMUSG00000114470	Gm49395	predicted gene, 49395 [Source:MGI Symbol;Acc:MGI:6121627]	nonsense_mediated_decay;protein_coding;processed_transcript	1.52687	1.185	1.59002	0.0001	0.000116729	0.00713623	585.056	9.19243	1.22135e-27	up	yes
ENSMUSG00000086782	E130102H24Rik	RIKEN cDNA E130102H24 gene [Source:MGI Symbol;Acc:MGI:1925116]	lincRNA	1.87855	1.03364	2.78538	0.0001	0.0001	0.0001	18991.9	14.2131	3.25969e-22	up	yes
ENSMUSG00000005615	Pcyt1a	phosphate cytidylyltransferase 1, choline, alpha isoform [Source:MGI Symbol;Acc:MGI:88557]	protein_coding;retained_intron	12.2521	13.14	13.6072	2.84418	3.10267	3.16505	4.28003	2.09762	2.45803e-21	up	yes
ENSMUSG00000092574	2810047C21Rik1	RIKEN cDNA 2810047C21 gene 1 [Source:MGI Symbol;Acc:MGI:1919966]	processed_transcript;transcribed_unprocessed_pseudogene	1.45934	0.560571	2.19055	0.0001	0.0001	0.0001	14034.9	13.7767	1.95542e-19	up	yes
ENSMUSG00000042804	Gpr153	G protein-coupled receptor 153 [Source:MGI Symbol;Acc:MGI:1916157]	protein_coding;processed_transcript	14.3414	10.4168	13.9255	4.18488	3.45276	3.81463	3.37782	1.75609	2.43268e-11	up	yes
ENSMUSG00000022812	Gsk3b	glycogen synthase kinase 3 beta [Source:MGI Symbol;Acc:MGI:1861437]	protein_coding;retained_intron;processed_transcript	8.65809	9.49908	9.92839	1.98985	2.49587	4.21631	3.22747	1.69041	4.87996e-10	up	yes
ENSMUSG00000058258	Idi1	isopentenyl-diphosphate delta isomerase [Source:MGI Symbol;Acc:MGI:2442264]	protein_coding;retained_intron	19.1245	16.4904	18.6875	7.42835	8.04438	6.27699	2.49669	1.32002	4.59954e-08	up	yes
ENSMUSG00000017679	Ttpal	tocopherol (alpha) transfer protein-like [Source:MGI Symbol;Acc:MGI:1923330]	protein_coding;retained_intron;nonsense_mediated_decay	7.1494	0.85415	7.40238	0.755232	0.675225	0.634251	7.46156	2.89948	5.3625e-07	up	yes
ENSMUSG00000036160	Surf6	surfeit gene 6 [Source:MGI Symbol;Acc:MGI:98447]	processed_transcript;protein_coding	5.0257	5.40284	5.94938	1.82671	2.5172	1.91721	2.61581	1.38726	7.00857e-07	up	yes
ENSMUSG00000058291	Zfp68	zinc finger protein 68 [Source:MGI Symbol;Acc:MGI:1344427]	protein_coding;processed_transcript;retained_intron	6.70051	4.89631	5.35034	1.9137	2.35718	3.11096	2.29579	1.19899	6.18861e-06	up	yes
ENSMUSG00000032258	Lca5	Leber congenital amaurosis 5 (human) [Source:MGI Symbol;Acc:MGI:1923032]	nonsense_mediated_decay;protein_coding;processed_transcript;retained_intron	1.27169	1.04443	1.00936	0.10702	0.367316	0.396808	3.81738	1.93258	1.20532e-05	up	yes
ENSMUSG00000040026	Saa3	serum amyloid A 3 [Source:MGI Symbol;Acc:MGI:98223]	protein_coding;processed_transcript	0.0387946	0.496659	0.71365	0.0219375	0.0001	0.04275	19.28	4.26903	2.39672e-05	up	yes
ENSMUSG00000040599	Mis12	MIS12 kinetochore complex component [Source:MGI Symbol;Acc:MGI:1914389]	protein_coding	15.195	12.8475	14.8584	6.85644	1.65932	1.7583	4.17567	2.06201	4.16379e-05	up	yes
ENSMUSG00000020738	Sumo2	small ubiquitin-like modifier 2 [Source:MGI Symbol;Acc:MGI:2158813]	protein_coding;retained_intron;nonsense_mediated_decay	5.02724	38.6208	36.9308	7.28483	5.30514	4.6989	4.66073	2.22056	6.04177e-05	up	yes
ENSMUSG00000038174	Fam126b	family with sequence similarity 126, member B [Source:MGI Symbol;Acc:MGI:1098784]	protein_coding;nonsense_mediated_decay;retained_intron;processed_transcript	0.761044	0.812088	1.07741	0.355519	0.377185	0.34018	2.47049	1.3048	6.33334e-05	up	yes
ENSMUSG00000027651	Rprd1b	regulation of nuclear pre-mRNA domain containing 1B [Source:MGI Symbol;Acc:MGI:1917720]	protein_coding;retained_intron;processed_transcript	5.96381	5.73115	1.45348	1.00314	1.35946	1.69147	3.24328	1.69745	0.000107271	up	yes
ENSMUSG00000037652	Phc3	polyhomeotic 3 [Source:MGI Symbol;Acc:MGI:2181434]	protein_coding;nonsense_mediated_decay;retained_intron	1.84905	0.550672	3.36272	0.368865	0.56202	0.662529	3.61641	1.85456	0.000113633	up	yes
ENSMUSG00000094365	Gm21982	predicted gene 21982 [Source:MGI Symbol;Acc:MGI:5439451]	retained_intron	8.07142	0.097389	2.22604	0.403222	0.159453	0.05287	16.8872	4.07786	0.000140648	up	yes
ENSMUSG00000020265	Sumo3	small ubiquitin-like modifier 3 [Source:MGI Symbol;Acc:MGI:1336201]	protein_coding;nonsense_mediated_decay;processed_transcript	20.3739	17.989	18.5346	10.7056	9.8742	10.7261	1.81747	0.861934	0.000165099	up	no
ENSMUSG00000046807	Lrrc75b	leucine rich repeat containing 75B [Source:MGI Symbol;Acc:MGI:2143657]	protein_coding	0.513467	2.92844	1.35936	0.394327	0.418143	0.414179	3.91413	1.96869	0.000211841	up	yes
ENSMUSG00000024006	Stk38	serine/threonine kinase 38 [Source:MGI Symbol;Acc:MGI:2442572]	protein_coding;retained_intron;processed_transcript;nonsense_mediated_decay	4.1956	5.16795	4.76752	1.96344	2.66904	2.9005	1.8759	0.90758	0.000223393	up	no
ENSMUSG00000026276	Sept2	septin 2 [Source:MGI Symbol;Acc:MGI:97298]	protein_coding;retained_intron	29.398	0.924273	1.38545	0.640489	1.18737	1.15853	10.6174	3.40836	0.00024035	up	yes
ENSMUSG00000053080	2700081O15Rik	RIKEN cDNA 2700081O15 gene [Source:MGI Symbol;Acc:MGI:1919667]	protein_coding;retained_intron;nonsense_mediated_decay	5.91083	5.66766	2.35921	1.81967	2.0005	2.02837	2.38311	1.25285	0.000274293	up	yes
ENSMUSG00000022641	Bbx	bobby sox HMG box containing [Source:MGI Symbol;Acc:MGI:1917758]	protein_coding;retained_intron;processed_transcript	2.64173	1.72538	2.85939	0.95721	1.13982	1.4409	2.04258	1.03039	0.00029814	up	yes
ENSMUSG00000112847	Gm47573	predicted gene, 47573 [Source:MGI Symbol;Acc:MGI:6096604]	TEC	0.488039	0.289673	0.37902	0.034962	0.125247	0.138392	3.87384	1.95376	0.000314926	up	yes
ENSMUSG00000069622	Gm10273	predicted pseudogene 10273 [Source:MGI Symbol;Acc:MGI:3704362]	protein_coding	8.63561	0.867538	1.80533	0.65032	0.542549	0.775807	5.74421	2.52211	0.000339071	up	yes
ENSMUSG00000022361	Zhx1	zinc fingers and homeoboxes 1 [Source:MGI Symbol;Acc:MGI:109271]	protein_coding;retained_intron	7.58893	8.16846	5.82712	2.91922	4.09664	4.33681	1.90127	0.926965	0.000417877	up	no
ENSMUSG00000056445	Hoxaas2	Hoxa cluster antisense RNA 2 [Source:MGI Symbol;Acc:MGI:1913890]	antisense;retained_intron;processed_transcript	0.496263	0.273462	0.336836	0.161987	0.059922	0.0831094	3.62785	1.85911	0.00060927	up	yes
ENSMUSG00000103436	Gm36995	predicted gene, 36995 [Source:MGI Symbol;Acc:MGI:5610223]	retained_intron	0.632018	0.643588	0.396567	0.120557	0.194125	0.279968	2.81203	1.49161	0.000698632	up	yes
ENSMUSG00000053580	Tanc2	tetratricopeptide repeat, ankyrin repeat and coiled-coil containing 2 [Source:MGI Symbol;Acc:MGI:2444121]	protein_coding;processed_transcript	3.12691	3.70335	1.10955	0.735376	1.07239	1.37905	2.49145	1.31699	0.000722781	up	yes
ENSMUSG00000049421	Zfp260	zinc finger protein 260 [Source:MGI Symbol;Acc:MGI:1347071]	protein_coding;retained_intron;processed_transcript	3.84819	0.805949	0.97665	0.478258	0.51928	0.658608	3.39994	1.76551	0.000828077	up	yes
ENSMUSG00000081953	Gm12435	predicted gene 12435 [Source:MGI Symbol;Acc:MGI:3651950]	processed_pseudogene	43.9372	2.35018	2.0763	2.36719	1.53876	2.22797	7.88464	2.97904	0.00083132	up	yes
ENSMUSG00000052293	Taf9	TATA-box binding protein associated factor 9 [Source:MGI Symbol;Acc:MGI:1888697]	protein_coding	3.69664	2.1297	2.66324	0.979064	0.950816	1.54501	2.44312	1.28873	0.000839003	up	yes
ENSMUSG00000078427	Sarnp	SAP domain containing ribonucleoprotein [Source:MGI Symbol;Acc:MGI:1913368]	protein_coding;retained_intron;nonsense_mediated_decay;processed_transcript	38.3132	14.6238	21.7696	7.40769	13.2798	12.4562	2.25403	1.1725	0.000906287	up	yes
ENSMUSG00000060771	Tsga10	testis specific 10 [Source:MGI Symbol;Acc:MGI:2685063]	protein_coding;retained_intron;nonsense_mediated_decay	0.635567	0.692358	0.761673	0.132849	0.321845	0.392135	2.46755	1.30308	0.000985412	up	yes
ENSMUSG00000053012	Krcc1	lysine-rich coiled-coil 1 [Source:MGI Symbol;Acc:MGI:1889377]	protein_coding	10.3586	31.7321	38.5799	13.0072	9.3274	9.70846	2.51756	1.33203	0.00114926	up	yes
ENSMUSG00000060477	Irak2	interleukin-1 receptor-associated kinase 2 [Source:MGI Symbol;Acc:MGI:2429603]	protein_coding;retained_intron;processed_transcript;nonsense_mediated_decay	4.88854	5.80159	6.91214	2.05823	2.97452	3.99744	1.94927	0.962933	0.001174	up	no
ENSMUSG00000082399	Gm14036	predicted gene 14036 [Source:MGI Symbol;Acc:MGI:3649581]	processed_pseudogene	166.117	79.1615	120.783	68.3583	59.6003	60.9165	1.93812	0.954654	0.00118846	up	no
ENSMUSG00000019990	Pde7b	phosphodiesterase 7B [Source:MGI Symbol;Acc:MGI:1352752]	protein_coding;retained_intron;nonsense_mediated_decay	0.117567	0.100259	0.142987	0.033892	0.0322077	0.0606124	2.84749	1.50969	0.00164535	up	yes
ENSMUSG00000040111	Gramd1b	GRAM domain containing 1B [Source:MGI Symbol;Acc:MGI:1925037]	protein_coding;retained_intron;processed_transcript	2.30155	1.95443	2.42655	1.21575	1.24401	1.22777	1.81219	0.857737	0.00171503	up	no
ENSMUSG00000005505	Kbtbd4	kelch repeat and BTB (POZ) domain containing 4 [Source:MGI Symbol;Acc:MGI:1914386]	protein_coding;processed_transcript	7.5884	8.12124	3.32007	2.20917	2.74433	3.66082	2.20908	1.14345	0.0017289	up	yes
ENSMUSG00000017615	Tnfaip1	tumor necrosis factor, alpha-induced protein 1 (endothelial) [Source:MGI Symbol;Acc:MGI:104961]	protein_coding	9.39179	37.1476	37.7773	13.084	10.0198	11.4561	2.43972	1.28672	0.00193887	up	yes
ENSMUSG00000053205	Styx	serine/threonine/tyrosine interaction protein [Source:MGI Symbol;Acc:MGI:1891150]	protein_coding;nonsense_mediated_decay;retained_intron	1.78204	0.481173	0.703302	0.215731	0.534972	0.359443	2.67219	1.41802	0.00205598	up	yes
ENSMUSG00000033306	Lpp	LIM domain containing preferred translocation partner in lipoma [Source:MGI Symbol;Acc:MGI:2441849]	protein_coding;retained_intron;nonsense_mediated_decay	3.52495	3.64602	3.93006	2.48338	1.60078	0.646538	2.3466	1.23057	0.00241093	up	yes
ENSMUSG00000060989	Gm11847	predicted gene 11847 [Source:MGI Symbol;Acc:MGI:3651787]	processed_pseudogene	29.4213	25.7549	53.5907	17.8852	16.8378	22.3178	1.90683	0.931177	0.0028473	up	no
ENSMUSG00000036291	Ap5m1	adaptor-related protein complex 5, mu 1 subunit [Source:MGI Symbol;Acc:MGI:1921635]	protein_coding;nonsense_mediated_decay	2.70094	1.58694	2.76838	0.664264	1.36116	1.53317	1.98288	0.987597	0.00320495	up	no
ENSMUSG00000051285	Pcmtd1	protein-L-isoaspartate (D-aspartate) O-methyltransferase domain containing 1 [Source:MGI Symbol;Acc:MGI:2441773]	protein_coding;retained_intron;nonsense_mediated_decay;processed_transcript	4.22103	10.5888	10.4754	4.5367	4.5658	3.45961	2.01282	1.00922	0.00342716	up	yes
ENSMUSG00000096856	Gm10778	predicted gene 10778 [Source:MGI Symbol;Acc:MGI:3809656]	protein_coding	1.12914	0.546671	0.472585	0.307674	0.207415	0.312364	2.59639	1.37651	0.0036386	up	yes
ENSMUSG00000039997	Ifi203	interferon activated gene 203 [Source:MGI Symbol;Acc:MGI:96428]	protein_coding;processed_transcript;retained_intron	3.43083	2.63927	1.46526	1.02827	1.26499	1.48579	1.99398	0.995652	0.00406199	up	no
ENSMUSG00000049957	Ccdc137	coiled-coil domain containing 137 [Source:MGI Symbol;Acc:MGI:1914541]	protein_coding;processed_transcript;retained_intron	6.27228	5.17153	6.79754	4.38108	2.38047	2.31948	2.00873	1.00628	0.00425765	up	yes
ENSMUSG00000112922	Gm47572	predicted gene, 47572 [Source:MGI Symbol;Acc:MGI:6096602]	TEC	0.290454	0.348986	0.436196	0.08056	0.200769	0.133895	2.5905	1.37323	0.00465939	up	yes
ENSMUSG00000041679	Lrrc29	leucine rich repeat containing 29 [Source:MGI Symbol;Acc:MGI:2443262]	protein_coding;nonsense_mediated_decay	0.238134	0.568843	0.659424	0.169407	0.142065	0.236785	2.67466	1.41936	0.00500751	up	yes
ENSMUSG00000040717	Il17rd	interleukin 17 receptor D [Source:MGI Symbol;Acc:MGI:2159727]	protein_coding;processed_transcript	2.25923	0.470774	0.379967	0.269283	0.285373	0.453509	3.08478	1.62517	0.00505924	up	yes
ENSMUSG00000044501	Zfp758	zinc finger protein 758 [Source:MGI Symbol;Acc:MGI:2385044]	protein_coding	3.78813	3.43461	3.83588	0.597724	1.76128	2.53814	2.25818	1.17516	0.00529669	up	yes
ENSMUSG00000038486	Sv2a	synaptic vesicle glycoprotein 2 a [Source:MGI Symbol;Acc:MGI:1927139]	protein_coding;retained_intron;processed_transcript	0.328273	0.209524	0.270238	0.0857508	0.108913	0.140582	2.41028	1.2692	0.00549107	up	yes
ENSMUSG00000078867	Gm14418	predicted gene 14418 [Source:MGI Symbol;Acc:MGI:3702408]	processed_transcript;protein_coding	0.42717	0.570244	0.339559	0.146147	0.210599	0.187534	2.45641	1.29655	0.00615405	up	yes
ENSMUSG00000029634	Rnf6	ring finger protein (C3H2C3 type) 6 [Source:MGI Symbol;Acc:MGI:1921382]	protein_coding;processed_transcript	18.5594	16.9237	20.2178	3.45486	8.18446	15.617	2.04359	1.03111	0.00622985	up	yes
ENSMUSG00000021803	Cdhr1	cadherin-related family member 1 [Source:MGI Symbol;Acc:MGI:2157782]	protein_coding	16.232	14.0191	13.1011	8.23995	9.90245	9.71697	1.55611	0.637942	0.00666578	up	no
ENSMUSG00000021390	Ogn	osteoglycin [Source:MGI Symbol;Acc:MGI:109278]	protein_coding	166.506	146.047	155.92	34.9193	106.064	112.021	1.85164	0.888801	0.00691818	up	no
ENSMUSG00000030110	Ret	ret proto-oncogene [Source:MGI Symbol;Acc:MGI:97902]	protein_coding	0.345732	0.240915	0.281218	0.121294	0.134885	0.13689	2.20792	1.14269	0.00696752	up	yes
ENSMUSG00000024087	Cyp1b1	cytochrome P450, family 1, subfamily b, polypeptide 1 [Source:MGI Symbol;Acc:MGI:88590]	protein_coding;nonsense_mediated_decay	29.3639	30.8061	29.2397	16.3284	22.6534	19.7667	1.52191	0.605881	0.00731723	up	no
ENSMUSG00000082662	Gm15516	predicted gene 15516 [Source:MGI Symbol;Acc:MGI:3782963]	processed_pseudogene	17.8503	8.32686	13.9235	5.21468	3.23713	7.82824	2.46318	1.30052	0.00742189	up	yes
ENSMUSG00000063383	Zfp947	zinc finger protein 947 [Source:MGI Symbol;Acc:MGI:3646759]	protein_coding	0.445762	0.584307	0.568115	0.163213	0.263987	0.267405	2.30085	1.20217	0.00743757	up	yes
ENSMUSG00000068130	Zfp442	zinc finger protein 442 [Source:MGI Symbol;Acc:MGI:3651999]	protein_coding	0.538926	0.927601	0.722943	0.15944	0.507118	0.179561	2.58766	1.37165	0.00786659	up	yes
ENSMUSG00000028248	Pnisr	PNN interacting serine/arginine-rich [Source:MGI Symbol;Acc:MGI:1913875]	protein_coding;processed_transcript;nonsense_mediated_decay	8.95116	5.5118	6.52658	2.43458	3.86638	5.80448	1.73389	0.794015	0.00809454	up	no
ENSMUSG00000054619	Mettl7a1	methyltransferase like 7A1 [Source:MGI Symbol;Acc:MGI:1916523]	protein_coding;nonsense_mediated_decay	7.59781	6.64387	7.1666	1.60977	1.95578	6.22679	2.18623	1.12844	0.00829432	up	yes
ENSMUSG00000027329	Spef1	sperm flagellar 1 [Source:MGI Symbol;Acc:MGI:3513546]	protein_coding	2.66978	2.66773	2.72645	1.68763	1.16171	1.35702	1.91709	0.938919	0.00842163	up	no
ENSMUSG00000040997	Abhd4	abhydrolase domain containing 4 [Source:MGI Symbol;Acc:MGI:1915938]	protein_coding;retained_intron;nonsense_mediated_decay	38.8354	42.1014	41.8298	19.2774	35.8906	20.1142	1.63076	0.70554	0.00844033	up	no
ENSMUSG00000116138	C030006K11Rik	RIKEN cDNA C030006K11 gene [Source:MGI Symbol;Acc:MGI:1925941]	protein_coding;retained_intron;processed_transcript;nonsense_mediated_decay	8.61549	8.75849	4.58262	4.37057	3.70407	3.73442	1.8593	0.89476	0.00847311	up	no
ENSMUSG00000094410	Gm38394	predicted gene, 38394 [Source:MGI Symbol;Acc:MGI:5614057]	protein_coding;nonsense_mediated_decay	13.1525	15.0014	18.3781	0.007935	4.90603	2.73992	6.07955	2.60396	0.00870198	up	yes
ENSMUSG00000021767	Kat6b	K(lysine) acetyltransferase 6B [Source:MGI Symbol;Acc:MGI:1858746]	retained_intron;protein_coding;processed_transcript	1.86023	2.00005	2.12379	0.88446	1.71018	0.65817	1.83966	0.879441	0.00888836	up	no
ENSMUSG00000074415	3110039I08Rik	RIKEN cDNA 3110039I08 gene [Source:MGI Symbol;Acc:MGI:1920394]	retained_intron;lincRNA;processed_transcript	2.43133	1.59261	2.53543	0.672252	1.96105	0.785407	1.91867	0.940104	0.00998188	up	no
ENSMUSG00000082195	Gm13034	predicted gene 13034 [Source:MGI Symbol;Acc:MGI:3650252]	processed_pseudogene	1.55924	1.65005	1.26519	0.432183	0.98626	0.798479	2.01833	1.01316	0.010355	up	yes
ENSMUSG00000046897	Zfp740	zinc finger protein 740 [Source:MGI Symbol;Acc:MGI:1915994]	retained_intron;protein_coding;processed_transcript	10.6884	4.48992	2.94962	2.79223	3.24862	2.7506	2.062	1.04404	0.0103611	up	yes
ENSMUSG00000061411	Nol4l	nucleolar protein 4-like [Source:MGI Symbol;Acc:MGI:1918765]	protein_coding;processed_transcript	0.312682	0.247784	0.356912	0.158586	0.155535	0.127137	2.079	1.05589	0.0110741	up	yes
ENSMUSG00000044566	Cage1	cancer antigen 1 [Source:MGI Symbol;Acc:MGI:1918463]	protein_coding	0.659109	0.26224	0.67063	0.148152	0.235207	0.301707	2.32384	1.21651	0.0112679	up	yes
ENSMUSG00000028382	Ptbp3	polypyrimidine tract binding protein 3 [Source:MGI Symbol;Acc:MGI:1923334]	protein_coding;retained_intron;nonsense_mediated_decay	10.5639	11.5227	12.5217	5.65395	8.39523	8.85454	1.51103	0.595534	0.012729	up	no
ENSMUSG00000056870	Gulp1	GULP, engulfment adaptor PTB domain containing 1 [Source:MGI Symbol;Acc:MGI:1920407]	nonsense_mediated_decay;protein_coding;processed_transcript	18.4621	15.5777	17.6601	6.31272	14.7956	10.728	1.62393	0.699489	0.0127478	up	no
ENSMUSG00000057895	Zfp105	zinc finger protein 105 [Source:MGI Symbol;Acc:MGI:1277119]	protein_coding	0.648595	0.363738	0.542309	0.0436349	0.226884	0.307347	2.69032	1.42778	0.0132977	up	yes
ENSMUSG00000051323	Pcdh19	protocadherin 19 [Source:MGI Symbol;Acc:MGI:2685563]	protein_coding;processed_transcript;nonsense_mediated_decay	6.97301	8.02097	6.36852	1.73243	2.76657	6.7841	1.89332	0.920916	0.0135662	up	no
ENSMUSG00000042851	Zc3h6	zinc finger CCCH type containing 6 [Source:MGI Symbol;Acc:MGI:1926001]	protein_coding	2.51036	2.26985	2.87606	0.802154	1.85004	1.68427	1.76556	0.820122	0.0136539	up	no
ENSMUSG00000013033	Adgrl1	adhesion G protein-coupled receptor L1 [Source:MGI Symbol;Acc:MGI:1929461]	nonsense_mediated_decay;protein_coding;retained_intron;processed_transcript	12.3566	4.80504	5.47962	4.00218	3.91777	4.74573	1.7876	0.838027	0.013685	up	no
ENSMUSG00000112964	E430024I08Rik	RIKEN cDNA E430024I08 gene [Source:MGI Symbol;Acc:MGI:3649010]	lincRNA	1.13204	1.25526	1.36965	0.297133	0.680187	0.893354	2.00835	1.00601	0.0136922	up	yes
ENSMUSG00000020330	Hmmr	hyaluronan mediated motility receptor (RHAMM) [Source:MGI Symbol;Acc:MGI:104667]	protein_coding;processed_transcript	3.84981	3.60075	4.30114	1.3487	2.35329	3.1584	1.71298	0.776509	0.0137008	up	no
ENSMUSG00000015880	Ncapg	non-SMC condensin I complex, subunit G [Source:MGI Symbol;Acc:MGI:1930197]	retained_intron;protein_coding	2.02058	1.83586	2.08024	0.743031	1.11873	1.5781	1.72585	0.787305	0.0137213	up	no
ENSMUSG00000006010	Odr4	odr4 GPCR localization factor homolog [Source:MGI Symbol;Acc:MGI:2385108]	protein_coding;retained_intron;processed_transcript;nonsense_mediated_decay	6.00019	5.72558	14.6414	2.18254	5.04945	5.99019	1.99416	0.995782	0.0140903	up	no
ENSMUSG00000099342	Gm18180	predicted gene, 18180 [Source:MGI Symbol;Acc:MGI:5010365]	processed_pseudogene	2.36122	0.547297	0.629817	0.331466	0.400944	0.552824	2.75307	1.46104	0.0141439	up	yes
ENSMUSG00000051483	Cbr1	carbonyl reductase 1 [Source:MGI Symbol;Acc:MGI:88284]	protein_coding;processed_transcript	8.80992	7.0063	7.62259	6.33136	2.42916	2.96512	1.99894	0.999232	0.0143126	up	no
ENSMUSG00000107145	Gm43442	predicted gene 43442 [Source:MGI Symbol;Acc:MGI:5663579]	processed_pseudogene	1.45828	2.88497	2.2968	1.42282	0.472125	0.526925	2.7417	1.45507	0.0144041	up	yes
ENSMUSG00000022674	Ube2v2	ubiquitin-conjugating enzyme E2 variant 2 [Source:MGI Symbol;Acc:MGI:1917870]	protein_coding;nonsense_mediated_decay;retained_intron	4.46815	3.63826	4.79994	0.701167	3.81539	1.65881	2.08997	1.06348	0.0144255	up	yes
ENSMUSG00000111291	Gm48604	predicted gene, 48604 [Source:MGI Symbol;Acc:MGI:6098186]	lincRNA	1.30366	2.56032	2.49997	0.179146	1.20486	1.12091	2.54059	1.34516	0.015253	up	yes
ENSMUSG00000036030	Prtg	protogenin [Source:MGI Symbol;Acc:MGI:2444710]	protein_coding;retained_intron	0.159308	0.107134	0.12784	0.0691654	0.0524287	0.056701	2.2114	1.14496	0.0152928	up	yes
ENSMUSG00000096795	Zfp433	zinc finger protein 433 [Source:MGI Symbol;Acc:MGI:1920860]	protein_coding;processed_transcript	0.544426	0.618537	0.866011	0.210645	0.428724	0.311823	2.13309	1.09294	0.0154486	up	yes
ENSMUSG00000094786	Gm14403	predicted gene 14403 [Source:MGI Symbol;Acc:MGI:3649813]	processed_transcript;protein_coding	3.26667	1.41224	2.69402	0.28692	1.65064	1.01047	2.50097	1.32249	0.0155823	up	yes
ENSMUSG00000021835	Bmp4	bone morphogenetic protein 4 [Source:MGI Symbol;Acc:MGI:88180]	protein_coding;retained_intron	6.14264	20.6675	5.64405	4.80975	5.43537	5.22609	2.09772	1.06882	0.0157696	up	yes
ENSMUSG00000030162	Olr1	oxidized low density lipoprotein (lectin-like) receptor 1 [Source:MGI Symbol;Acc:MGI:1261434]	protein_coding	1.06142	1.00658	0.923711	0.183562	0.609368	0.587718	2.16689	1.11562	0.0158003	up	yes
ENSMUSG00000025094	Slc18a2	solute carrier family 18 (vesicular monoamine), member 2 [Source:MGI Symbol;Acc:MGI:106677]	protein_coding;retained_intron	0.389819	0.567462	0.548369	0.22901	0.312715	0.207667	2.00916	1.00659	0.0159842	up	yes
ENSMUSG00000030074	Gxylt2	glucoside xylosyltransferase 2 [Source:MGI Symbol;Acc:MGI:2682940]	protein_coding;processed_transcript	3.85486	4.08141	4.1115	2.21102	3.0508	2.56698	1.53891	0.621904	0.0162622	up	no
ENSMUSG00000059602	Syn3	synapsin III [Source:MGI Symbol;Acc:MGI:1351334]	retained_intron;protein_coding;processed_transcript	0.0506789	0.238882	0.0858369	0.069185	0.0341002	0.0177953	3.1004	1.63245	0.0164001	up	yes
ENSMUSG00000031166	Wdr13	WD repeat domain 13 [Source:MGI Symbol;Acc:MGI:1914661]	protein_coding;retained_intron;processed_transcript;nonsense_mediated_decay	12.8486	10.2783	12.7284	5.57971	9.17021	8.86298	1.51846	0.602606	0.0164305	up	no
ENSMUSG00000020053	Igf1	insulin-like growth factor 1 [Source:MGI Symbol;Acc:MGI:96432]	protein_coding	14.6567	14.612	15.1861	5.98222	11.9397	10.9994	1.53709	0.620204	0.0165575	up	no
ENSMUSG00000024795	Kif20b	kinesin family member 20B [Source:MGI Symbol;Acc:MGI:2444576]	protein_coding;retained_intron;nonsense_mediated_decay	1.78856	1.45262	2.00153	0.273665	0.895206	1.34725	2.08364	1.05911	0.016701	up	yes
ENSMUSG00000034614	Pik3ip1	phosphoinositide-3-kinase interacting protein 1 [Source:MGI Symbol;Acc:MGI:1917016]	protein_coding;retained_intron;processed_transcript	3.25834	3.16435	8.84742	2.21012	2.80585	2.93869	1.91964	0.940838	0.0168964	up	no
ENSMUSG00000079144	A130010J15Rik	RIKEN cDNA A130010J15 gene [Source:MGI Symbol;Acc:MGI:2441776]	protein_coding	2.57194	1.77479	2.51569	1.38488	1.40684	1.10674	1.76029	0.815812	0.0169016	up	no
ENSMUSG00000092183	4930515G01Rik	RIKEN cDNA 4930515G01 gene [Source:MGI Symbol;Acc:MGI:1914892]	antisense	0.475518	0.807863	1.8494	0.415979	0.389912	0.442764	2.50893	1.32707	0.0170935	up	yes
ENSMUSG00000040167	Ikzf5	IKAROS family zinc finger 5 [Source:MGI Symbol;Acc:MGI:1914393]	protein_coding;retained_intron	2.80133	2.63566	3.21938	1.55967	2.20153	1.52759	1.63674	0.710823	0.017212	up	no
ENSMUSG00000032126	Hmbs	hydroxymethylbilane synthase [Source:MGI Symbol;Acc:MGI:96112]	protein_coding;retained_intron;nonsense_mediated_decay	5.17096	5.74744	6.03948	3.66914	3.49605	3.56633	1.58019	0.660101	0.0178432	up	no
ENSMUSG00000047735	Samd9l	sterile alpha motif domain containing 9-like [Source:MGI Symbol;Acc:MGI:1343184]	protein_coding	3.69556	3.81115	4.39079	0.824148	2.56036	3.02559	1.85606	0.89224	0.0184786	up	no
ENSMUSG00000084799	Ino80dos	INO80 complex subunit D, opposite strand [Source:MGI Symbol;Acc:MGI:3651861]	lincRNA	0.628247	0.304248	0.546239	0.29664	0.112319	0.201011	2.42427	1.27755	0.0186375	up	yes
ENSMUSG00000096696	Zfp960	zinc finger protein 960 [Source:MGI Symbol;Acc:MGI:3052731]	protein_coding	4.71572	3.29259	4.54352	0.925429	2.54738	3.08535	1.91393	0.936534	0.018693	up	no
ENSMUSG00000033952	Aspm	abnormal spindle microtubule assembly [Source:MGI Symbol;Acc:MGI:1334448]	protein_coding;retained_intron;processed_transcript	1.34519	0.947963	1.37758	0.414021	0.845696	0.867284	1.72578	0.787248	0.0187242	up	no
ENSMUSG00000031309	Rps6ka3	ribosomal protein S6 kinase polypeptide 3 [Source:MGI Symbol;Acc:MGI:104557]	protein_coding;processed_transcript;retained_intron	5.34744	5.22276	4.65841	2.71457	3.91408	3.45319	1.5105	0.595024	0.0191073	up	no
ENSMUSG00000020661	Dnmt3a	DNA methyltransferase 3A [Source:MGI Symbol;Acc:MGI:1261827]	protein_coding;retained_intron;nonsense_mediated_decay	1.02409	1.26472	1.17129	0.991842	0.297396	0.294402	2.1849	1.12757	0.0202404	up	yes
ENSMUSG00000097392	D930016D06Rik	RIKEN cDNA D930016D06 gene [Source:MGI Symbol;Acc:MGI:2442700]	lincRNA	1.71638	1.33813	2.2909	0.479088	1.36314	0.964348	1.9046	0.929489	0.0202915	up	no
ENSMUSG00000030882	Dnhd1	dynein heavy chain domain 1 [Source:MGI Symbol;Acc:MGI:1924755]	protein_coding;retained_intron	0.120008	0.0188555	0.094639	0.007569	0.0414491	0.0275803	3.0484	1.60805	0.0207342	up	yes
ENSMUSG00000033964	Zbtb41	zinc finger and BTB domain containing 41 [Source:MGI Symbol;Acc:MGI:2444487]	protein_coding;nonsense_mediated_decay	3.31216	4.01373	3.82318	1.62261	3.41828	1.66245	1.66321	0.733971	0.0212679	up	no
ENSMUSG00000026605	Cenpf	centromere protein F [Source:MGI Symbol;Acc:MGI:1313302]	protein_coding;retained_intron;nonsense_mediated_decay	1.50696	1.43921	1.94282	0.379669	1.01918	1.3237	1.79575	0.844584	0.0216666	up	no
ENSMUSG00000068205	Macrod2	MACRO domain containing 2 [Source:MGI Symbol;Acc:MGI:1920149]	retained_intron;processed_transcript;protein_coding	0.0532647	0.111838	0.0864811	0.0276963	0.0451621	0.0377868	2.27379	1.1851	0.0216948	up	yes
ENSMUSG00000023025	Larp4	La ribonucleoprotein domain family, member 4 [Source:MGI Symbol;Acc:MGI:2443114]	protein_coding;nonsense_mediated_decay;retained_intron;processed_transcript	5.8067	1.9105	3.04571	2.00398	1.86032	2.16076	1.78635	0.837019	0.0219442	up	no
ENSMUSG00000029209	Gnpda2	glucosamine-6-phosphate deaminase 2 [Source:MGI Symbol;Acc:MGI:1915230]	protein_coding;retained_intron;nonsense_mediated_decay	2.4766	2.08198	2.4133	0.961861	1.69052	1.65639	1.61807	0.694273	0.0224218	up	no
ENSMUSG00000108322	5430431A17Rik	RIKEN cDNA 5430431A17 gene [Source:MGI Symbol;Acc:MGI:1918618]	lincRNA	4.95359	3.16575	4.67216	1.42658	2.78639	2.82698	1.81699	0.861549	0.022436	up	no
ENSMUSG00000041633	Kctd12b	potassium channel tetramerisation domain containing 12b [Source:MGI Symbol;Acc:MGI:2444667]	protein_coding	0.84369	0.849932	0.709837	0.267478	0.456782	0.562408	1.86797	0.901471	0.0227888	up	no
ENSMUSG00000060149	BC002059	cDNA sequence BC002059 [Source:MGI Symbol;Acc:MGI:2384864]	lincRNA	2.26242	0.96365	2.24631	0.65343	0.981721	1.05677	2.03289	1.02353	0.0228461	up	yes
ENSMUSG00000031004	Mki67	antigen identified by monoclonal antibody Ki 67 [Source:MGI Symbol;Acc:MGI:106035]	protein_coding	6.33306	6.02029	7.6277	1.89102	4.36952	5.82403	1.65344	0.725466	0.0229394	up	no
ENSMUSG00000004642	Slbp	stem-loop binding protein [Source:MGI Symbol;Acc:MGI:108402]	protein_coding;retained_intron	3.5603	4.24597	4.76553	2.29251	2.8832	2.97895	1.54167	0.624495	0.0233267	up	no
ENSMUSG00000040918	Slc19a2	solute carrier family 19 (thiamine transporter), member 2 [Source:MGI Symbol;Acc:MGI:1928761]	protein_coding;retained_intron	2.90742	2.51449	2.94715	1.203	2.42299	0.948974	1.82932	0.871308	0.0233959	up	no
ENSMUSG00000001175	Calm1	calmodulin 1 [Source:MGI Symbol;Acc:MGI:88251]	protein_coding;retained_intron	89.8471	85.8721	88.6688	27.6897	90.3733	30.6807	1.77747	0.829829	0.0234171	up	no
ENSMUSG00000039985	Sinhcaf	SIN3-HDAC complex associated factor [Source:MGI Symbol;Acc:MGI:1929091]	protein_coding;nonsense_mediated_decay;retained_intron;processed_transcript	3.08264	2.78683	3.49344	1.30411	0.998049	2.78454	1.84066	0.880227	0.0234282	up	no
ENSMUSG00000111176	Gm47233	predicted gene, 47233 [Source:MGI Symbol;Acc:MGI:6096050]	TEC	0.474096	0.268079	0.472658	0.133464	0.1994	0.23635	2.13423	1.09371	0.0238554	up	yes
ENSMUSG00000032745	Gpbp1	GC-rich promoter binding protein 1 [Source:MGI Symbol;Acc:MGI:1920524]	nonsense_mediated_decay;protein_coding;processed_transcript;retained_intron	16.3035	22.3113	16.9294	9.80592	14.0376	13.7598	1.47711	0.562774	0.023932	up	no
ENSMUSG00000099779	Gm8228	predicted gene 8228 [Source:MGI Symbol;Acc:MGI:3646986]	processed_pseudogene	1.08476	0.644017	0.78753	0.197604	0.598136	0.380053	2.1401	1.09768	0.0239639	up	yes
ENSMUSG00000048424	Ranbp3l	RAN binding protein 3-like [Source:MGI Symbol;Acc:MGI:2444654]	protein_coding;retained_intron;processed_transcript	0.817308	0.696395	0.68525	0.238116	0.518264	0.451204	1.82095	0.864692	0.0239964	up	no
ENSMUSG00000087088	Gm16638	predicted gene, 16638 [Source:MGI Symbol;Acc:MGI:4439562]	antisense	0.307779	0.291061	0.352585	0.168572	0.181918	0.160737	1.86106	0.896127	0.0241077	up	no
ENSMUSG00000020656	Grhl1	grainyhead like transcription factor 1 [Source:MGI Symbol;Acc:MGI:2182540]	protein_coding;processed_transcript	0.152652	0.193341	0.191808	0.058001	0.0587056	0.129565	2.18378	1.12682	0.0243542	up	yes
ENSMUSG00000089991	Gm16332	predicted gene 16332 [Source:MGI Symbol;Acc:MGI:3840155]	unprocessed_pseudogene	0.278108	0.596346	0.705126	0.083231	0.352802	0.231192	2.36739	1.2433	0.0250752	up	yes
ENSMUSG00000022228	Zscan26	zinc finger and SCAN domain containing 26 [Source:MGI Symbol;Acc:MGI:3531417]	protein_coding	10.8514	8.52491	10.8085	3.10405	2.35013	10.0654	1.94495	0.959735	0.0252398	up	no
ENSMUSG00000074794	Arrdc3	arrestin domain containing 3 [Source:MGI Symbol;Acc:MGI:2145242]	protein_coding;nonsense_mediated_decay;retained_intron	6.4708	5.81521	6.28267	3.50168	2.88695	5.4663	1.56633	0.647384	0.0260504	up	no
ENSMUSG00000052446	Zfp961	zinc finger protein 961 [Source:MGI Symbol;Acc:MGI:3583954]	protein_coding;nonsense_mediated_decay;processed_transcript	0.662618	1.332	0.998018	0.637017	0.526559	0.36315	1.96016	0.970974	0.0270306	up	no
ENSMUSG00000104443	4932442E05Rik	RIKEN cDNA 4932442E05 gene [Source:MGI Symbol;Acc:MGI:1921665]	TEC	0.622408	0.52361	0.50204	0.142834	0.27149	0.389389	2.05056	1.03601	0.0271036	up	yes
ENSMUSG00000087008	Gm5530	predicted gene 5530 [Source:MGI Symbol;Acc:MGI:3646374]	processed_pseudogene	1.05914	1.32539	1.06282	0.283074	0.752372	0.605715	2.10055	1.07077	0.0272885	up	yes
ENSMUSG00000069421	Olfr810	olfactory receptor 810 [Source:MGI Symbol;Acc:MGI:3030644]	protein_coding	0.50415	0.545452	0.794186	0.198541	0.435017	0.325253	1.92299	0.943354	0.0284319	up	no
ENSMUSG00000030641	Ddias	DNA damage-induced apoptosis suppressor [Source:MGI Symbol;Acc:MGI:1921291]	protein_coding;processed_transcript	1.2709	1.17014	0.951616	0.438978	0.892134	0.508378	1.84434	0.883107	0.028949	up	no
ENSMUSG00000021377	Dek	DEK oncogene (DNA binding) [Source:MGI Symbol;Acc:MGI:1926209]	protein_coding;processed_transcript;nonsense_mediated_decay	20.9724	18.1981	22.8712	7.08092	16.274	16.6285	1.55168	0.633835	0.0291076	up	no
ENSMUSG00000059811	Atl2	atlastin GTPase 2 [Source:MGI Symbol;Acc:MGI:1929492]	protein_coding;retained_intron;nonsense_mediated_decay	6.37096	6.12428	6.88854	4.08635	3.91203	5.4149	1.44512	0.531188	0.0291795	up	no
ENSMUSG00000033207	Mamdc2	MAM domain containing 2 [Source:MGI Symbol;Acc:MGI:1918988]	protein_coding;nonsense_mediated_decay	13.7373	11.9822	13.1692	6.04042	10.1943	9.85794	1.49041	0.575708	0.0292895	up	no
ENSMUSG00000032624	Eml4	echinoderm microtubule associated protein like 4 [Source:MGI Symbol;Acc:MGI:1926048]	protein_coding;retained_intron	5.36771	4.84388	5.76079	2.0284	4.38505	3.83479	1.55855	0.640203	0.0296887	up	no
ENSMUSG00000014773	Dll1	delta like canonical Notch ligand 1 [Source:MGI Symbol;Acc:MGI:104659]	retained_intron;protein_coding;processed_transcript	5.05877	3.82251	4.84232	2.08052	3.31342	3.39357	1.56172	0.643133	0.0299824	up	no
ENSMUSG00000042063	Zfp386	zinc finger protein 386 (Kruppel-like) [Source:MGI Symbol;Acc:MGI:1930708]	protein_coding;retained_intron	3.2066	2.85352	3.13422	0.990873	2.35007	2.37783	1.60775	0.685041	0.0311822	up	no
ENSMUSG00000030016	Zfp638	zinc finger protein 638 [Source:MGI Symbol;Acc:MGI:1203484]	protein_coding;retained_intron;processed_transcript;nonsense_mediated_decay	2.82228	1.76604	2.03325	0.555461	1.36174	1.91502	1.72787	0.788993	0.0313384	up	no
ENSMUSG00000032035	Ets1	E26 avian leukemia oncogene 1, 5' domain [Source:MGI Symbol;Acc:MGI:95455]	protein_coding;retained_intron	4.90707	4.50943	4.91119	2.82036	4.19623	1.41849	1.69858	0.764332	0.0317766	up	no
ENSMUSG00000071181	3830408C21Rik	RIKEN cDNA 3830408C21 gene [Source:MGI Symbol;Acc:MGI:1917940]	lincRNA;retained_intron	0.218665	0.162849	0.221159	0.0649199	0.0788799	0.14709	2.07183	1.0509	0.0320159	up	yes
ENSMUSG00000029629	Phf14	PHD finger protein 14 [Source:MGI Symbol;Acc:MGI:1923539]	protein_coding;retained_intron;processed_transcript;nonsense_mediated_decay	2.93589	2.59903	2.80995	1.27958	2.12282	2.2183	1.48467	0.57014	0.0321163	up	no
ENSMUSG00000034343	Ube2f	ubiquitin-conjugating enzyme E2F (putative) [Source:MGI Symbol;Acc:MGI:1915171]	protein_coding;retained_intron	6.52261	3.5797	6.79671	3.02454	3.9623	3.99676	1.53857	0.621589	0.0323063	up	no
ENSMUSG00000095648	Gm2004	predicted gene 2004 [Source:MGI Symbol;Acc:MGI:3780174]	protein_coding	1.58839	2.57112	3.4331	0.560857	2.20367	0.778506	2.14297	1.09961	0.0323124	up	yes
ENSMUSG00000029863	Casp2	caspase 2 [Source:MGI Symbol;Acc:MGI:97295]	protein_coding;processed_transcript;retained_intron;nonsense_mediated_decay	4.01864	2.63741	2.11404	1.44121	1.99374	2.03888	1.60219	0.680042	0.0323988	up	no
ENSMUSG00000069793	Slfn9	schlafen 9 [Source:MGI Symbol;Acc:MGI:2445121]	protein_coding	0.654899	0.572844	0.658747	0.161223	0.398106	0.438459	1.89067	0.9189	0.0325024	up	no
ENSMUSG00000100876	2810454H06Rik	RIKEN cDNA 2810454H06 gene [Source:MGI Symbol;Acc:MGI:1920063]	antisense	0.293422	0.285028	0.121366	0.105229	0.143201	0.059256	2.27445	1.18552	0.0328661	up	yes
ENSMUSG00000051235	Gen1	GEN1, Holliday junction 5' flap endonuclease [Source:MGI Symbol;Acc:MGI:2443149]	protein_coding;retained_intron;nonsense_mediated_decay;processed_transcript	0.638459	0.695743	0.841797	0.384285	0.427467	0.481037	1.68318	0.75119	0.0331012	up	no
ENSMUSG00000105345	BC030343	cDNA sequence BC030343 [Source:MGI Symbol;Acc:MGI:2679267]	lincRNA	0.769269	0.260465	0.521809	0.158539	0.226537	0.33031	2.16882	1.11691	0.0331538	up	yes
ENSMUSG00000028175	Depdc1a	DEP domain containing 1a [Source:MGI Symbol;Acc:MGI:1923381]	protein_coding	2.63556	2.39982	3.46153	0.900697	1.68393	2.30929	1.73622	0.795949	0.0336003	up	no
ENSMUSG00000033906	Zdhhc15	zinc finger, DHHC domain containing 15 [Source:MGI Symbol;Acc:MGI:1915336]	protein_coding	1.10193	1.08272	1.08402	0.606263	0.647338	0.727582	1.64986	0.722341	0.0337156	up	no
ENSMUSG00000020914	Top2a	topoisomerase (DNA) II alpha [Source:MGI Symbol;Acc:MGI:98790]	protein_coding;processed_transcript	11.5989	10.9397	13.0122	5.5791	9.05885	9.94322	1.44626	0.532327	0.0337892	up	no
ENSMUSG00000083424	Rpl35a-ps4	ribosomal protein 35A, pseudogene 4 [Source:MGI Symbol;Acc:MGI:3650995]	processed_pseudogene	4.50539	3.33362	49.3317	7.82944	6.05582	2.89262	3.4075	1.76872	0.0338507	up	yes
ENSMUSG00000078995	Zfp456	zinc finger protein 456 [Source:MGI Symbol;Acc:MGI:3040694]	protein_coding	0.312475	0.233868	0.164873	0.0586944	0.158868	0.121503	2.09758	1.06872	0.0339774	up	yes
ENSMUSG00000071180	Smim15	small integral membrane protein 15 [Source:MGI Symbol;Acc:MGI:1922866]	protein_coding	12.2353	20.2067	23.1968	8.364	12.6742	0.83137	2.54411	1.34716	0.0344391	up	yes
ENSMUSG00000098374	Gm28043	predicted gene, 28043 [Source:MGI Symbol;Acc:MGI:5547779]	nonsense_mediated_decay	4.72586	3.54149	1.55523	1.52054	1.84326	2.2629	1.74571	0.803811	0.0344403	up	no
ENSMUSG00000070354	Evi2	ecotropic viral integration site 2 [Source:MGI Symbol;Acc:MGI:5439444]	nonsense_mediated_decay;protein_coding	1.15907	0.210694	0.384447	0.034861	0.347598	0.0001	4.58545	2.19706	0.0347046	up	yes
ENSMUSG00000028576	Ift74	intraflagellar transport 74 [Source:MGI Symbol;Acc:MGI:1914944]	protein_coding;processed_transcript	14.7718	13.6859	14.9586	4.09514	10.8852	11.8474	1.61833	0.694508	0.0349514	up	no
ENSMUSG00000073490	Ifi207	interferon activated gene 207 [Source:MGI Symbol;Acc:MGI:2138302]	protein_coding	0.34564	0.191986	0.332673	0.107053	0.141949	0.178848	2.03412	1.02441	0.0351376	up	yes
ENSMUSG00000024070	Prkd3	protein kinase D3 [Source:MGI Symbol;Acc:MGI:1922542]	protein_coding;retained_intron;processed_transcript	7.74838	8.23706	8.65201	3.79868	7.20701	5.94819	1.4532	0.539237	0.0354546	up	no
ENSMUSG00000057396	Zfp759	zinc finger protein 759 [Source:MGI Symbol;Acc:MGI:2446280]	protein_coding;processed_transcript	1.34634	1.23496	1.3768	0.379157	0.85624	0.97904	1.78741	0.837869	0.035469	up	no
ENSMUSG00000029569	Tmem168	transmembrane protein 168 [Source:MGI Symbol;Acc:MGI:1921794]	protein_coding;processed_transcript	7.95969	8.12364	7.94802	1.58201	8.33515	2.88301	1.87742	0.908754	0.0354874	up	no
ENSMUSG00000057880	Abat	4-aminobutyrate aminotransferase [Source:MGI Symbol;Acc:MGI:2443582]	protein_coding;retained_intron;processed_transcript	0.133955	0.0898234	0.140517	0.0765461	0.0566043	0.0374691	2.13513	1.09433	0.0365801	up	yes
ENSMUSG00000034206	Polq	polymerase (DNA directed), theta [Source:MGI Symbol;Acc:MGI:2155399]	nonsense_mediated_decay;protein_coding;retained_intron	0.394579	0.344535	0.515027	0.089236	0.246324	0.311864	1.93713	0.953917	0.036753	up	no
ENSMUSG00000041912	Tdrkh	tudor and KH domain containing protein [Source:MGI Symbol;Acc:MGI:1919884]	protein_coding;nonsense_mediated_decay	8.56089	5.2428	5.55454	2.76602	4.86799	4.93322	1.54037	0.623281	0.0367535	up	no
ENSMUSG00000003198	Zfp959	zinc finger protein 959 [Source:MGI Symbol;Acc:MGI:2385058]	protein_coding;retained_intron	2.95315	2.05517	2.54465	0.150744	0.308662	2.2902	2.74693	1.45782	0.0368115	up	yes
ENSMUSG00000019979	Apaf1	apoptotic peptidase activating factor 1 [Source:MGI Symbol;Acc:MGI:1306796]	protein_coding;processed_transcript;retained_intron	2.27409	1.79413	2.06856	1.2818	1.26399	1.49512	1.51866	0.602802	0.0368385	up	no
ENSMUSG00000056174	Col8a2	collagen, type VIII, alpha 2 [Source:MGI Symbol;Acc:MGI:88464]	protein_coding	10.1104	11.0042	10.8804	7.24733	7.32167	7.81917	1.42911	0.515112	0.0370808	up	no
ENSMUSG00000061603	Akap6	A kinase (PRKA) anchor protein 6 [Source:MGI Symbol;Acc:MGI:3050566]	protein_coding	5.72722	6.73922	6.9243	3.80351	4.43142	5.47472	1.41439	0.500177	0.0372192	up	no
ENSMUSG00000025862	Stag2	stromal antigen 2 [Source:MGI Symbol;Acc:MGI:1098583]	protein_coding;retained_intron;processed_transcript	8.30605	9.48401	8.77582	3.41938	7.57547	6.81505	1.49163	0.576894	0.0372221	up	no
ENSMUSG00000074863	Platr25	pluripotency associated transcript 25 [Source:MGI Symbol;Acc:MGI:3645613]	protein_coding;processed_transcript;nonsense_mediated_decay	0.894958	0.6233	0.836606	0.167386	0.503522	0.574368	1.89104	0.919179	0.0374278	up	no
ENSMUSG00000033715	Akr1c14	aldo-keto reductase family 1, member C14 [Source:MGI Symbol;Acc:MGI:2145458]	protein_coding;nonsense_mediated_decay	0.623652	0.833477	0.888871	0.143258	0.555585	0.466379	2.01335	1.0096	0.0377669	up	yes
ENSMUSG00000059474	Mbtd1	mbt domain containing 1 [Source:MGI Symbol;Acc:MGI:2143977]	protein_coding;processed_transcript	1.81774	1.8177	2.04511	0.695423	1.7059	1.21356	1.57143	0.65208	0.0381682	up	no
ENSMUSG00000061371	Zfp873	zinc finger protein 873 [Source:MGI Symbol;Acc:MGI:3040689]	protein_coding;retained_intron;processed_transcript	1.71876	1.18791	1.9855	0.515997	1.39572	0.74348	1.84249	0.881653	0.0385069	up	no
ENSMUSG00000025912	Mybl1	myeloblastosis oncogene-like 1 [Source:MGI Symbol;Acc:MGI:99925]	protein_coding;retained_intron	0.709651	1.03354	1.14168	0.182034	0.672126	0.641829	1.9284	0.947403	0.0388771	up	no
ENSMUSG00000054737	Zfp182	zinc finger protein 182 [Source:MGI Symbol;Acc:MGI:2442220]	protein_coding;processed_transcript	1.16124	1.12549	1.35943	0.290539	0.834362	0.907568	1.79395	0.843144	0.0390289	up	no
ENSMUSG00000026470	Stx6	syntaxin 6 [Source:MGI Symbol;Acc:MGI:1926235]	protein_coding;retained_intron;nonsense_mediated_decay;processed_transcript	2.4925	4.61854	1.84397	1.63744	1.67297	2.1451	1.64146	0.714982	0.0392096	up	no
ENSMUSG00000042606	Hirip3	HIRA interacting protein 3 [Source:MGI Symbol;Acc:MGI:2142364]	retained_intron;protein_coding;processed_transcript	4.63606	3.70347	4.87737	2.41929	3.0529	3.20628	1.52295	0.60687	0.0394855	up	no
ENSMUSG00000031196	F8	coagulation factor VIII [Source:MGI Symbol;Acc:MGI:88383]	protein_coding	0.217501	0.159481	0.209441	0.0299565	0.127453	0.1254	2.07356	1.05211	0.0402681	up	yes
ENSMUSG00000022034	Esco2	establishment of sister chromatid cohesion N-acetyltransferase 2 [Source:MGI Symbol;Acc:MGI:1919238]	protein_coding;retained_intron	1.12156	0.781028	1.29152	0.247876	0.668042	0.827365	1.83224	0.873609	0.0408543	up	no
ENSMUSG00000096718	Zfp781	zinc finger protein 781 [Source:MGI Symbol;Acc:MGI:3696710]	protein_coding	1.08371	1.11017	1.13645	0.294867	0.791728	0.768488	1.79524	0.84418	0.0409421	up	no
ENSMUSG00000019230	Lhx9	LIM homeobox protein 9 [Source:MGI Symbol;Acc:MGI:1316721]	protein_coding;retained_intron;nonsense_mediated_decay	0.643496	0.351426	0.46696	0.183278	0.354002	0.2882	1.77095	0.824521	0.0412069	up	no
ENSMUSG00000078889	Gm14288	predicted gene 14288 [Source:MGI Symbol;Acc:MGI:3706570]	protein_coding	2.40183	2.42223	1.71622	0.727249	1.59899	1.51956	1.70063	0.76607	0.0412746	up	no
ENSMUSG00000039431	Mtmr7	myotubularin related protein 7 [Source:MGI Symbol;Acc:MGI:1891693]	nonsense_mediated_decay;protein_coding;processed_transcript	0.281518	0.375085	0.341414	0.151004	0.250385	0.105642	1.96836	0.976991	0.0417978	up	no
ENSMUSG00000057003	Myh4	myosin, heavy polypeptide 4, skeletal muscle [Source:MGI Symbol;Acc:MGI:1339713]	protein_coding	72.4293	79.5972	68.3276	39.5605	54.3712	63.0038	1.40411	0.489652	0.042158	up	no
ENSMUSG00000027827	Kcnab1	potassium voltage-gated channel, shaker-related subfamily, beta member 1 [Source:MGI Symbol;Acc:MGI:109155]	protein_coding;retained_intron;processed_transcript	0.227608	0.196269	0.337014	0.115194	0.161797	0.135524	1.84452	0.883243	0.0422431	up	no
ENSMUSG00000027854	Sike1	suppressor of IKBKE 1 [Source:MGI Symbol;Acc:MGI:1913891]	protein_coding;retained_intron;nonsense_mediated_decay	9.31057	8.14122	9.01725	5.18338	5.03077	8.19274	1.438	0.52406	0.0424864	up	no
ENSMUSG00000089824	Rbm12	RNA binding motif protein 12 [Source:MGI Symbol;Acc:MGI:1922960]	protein_coding	5.20911	4.29806	2.42737	2.83824	2.35198	2.21348	1.61197	0.688825	0.0426742	up	no
ENSMUSG00000081325	Gm12599	predicted gene 12599 [Source:MGI Symbol;Acc:MGI:3651469]	processed_pseudogene	1.01486	1.29144	1.25802	0.531184	0.516939	0.798657	1.93002	0.948616	0.0429252	up	no
ENSMUSG00000023882	Zfp54	zinc finger protein 54 [Source:MGI Symbol;Acc:MGI:99201]	protein_coding	0.58044	0.903865	0.55606	0.26755	0.436865	0.400019	1.84743	0.885519	0.0429755	up	no
ENSMUSG00000028484	Psip1	PC4 and SFRS1 interacting protein 1 [Source:MGI Symbol;Acc:MGI:2142116]	protein_coding;retained_intron	17.5665	15.8201	15.984	6.51011	12.3402	14.755	1.46913	0.554962	0.0434332	up	no
ENSMUSG00000019787	Trdn	triadin [Source:MGI Symbol;Acc:MGI:1924007]	protein_coding;retained_intron	3.24005	2.63751	3.09156	0.641872	2.06045	2.55517	1.70597	0.770592	0.0442051	up	no
ENSMUSG00000067279	Ppp1r3c	protein phosphatase 1, regulatory subunit 3C [Source:MGI Symbol;Acc:MGI:1858229]	protein_coding	0.444681	0.646746	0.740679	0.298408	0.350834	0.33731	1.85708	0.893036	0.0442691	up	no
ENSMUSG00000032254	Kif23	kinesin family member 23 [Source:MGI Symbol;Acc:MGI:1919069]	protein_coding;processed_transcript;retained_intron	3.17846	2.84443	3.36935	1.83295	2.33056	2.26526	1.46097	0.546928	0.0443775	up	no
ENSMUSG00000058897	Col25a1	collagen, type XXV, alpha 1 [Source:MGI Symbol;Acc:MGI:1924268]	protein_coding;nonsense_mediated_decay;retained_intron;processed_transcript	0.442741	0.212378	0.393655	0.0801848	0.254415	0.213428	1.91372	0.936382	0.0444247	up	no
ENSMUSG00000101599	Gm20342	predicted gene, 20342 [Source:MGI Symbol;Acc:MGI:5012527]	lincRNA	0.138165	0.133395	0.120899	0.040702	0.075598	0.089473	1.90724	0.931488	0.0447655	up	no
ENSMUSG00000036768	Kif15	kinesin family member 15 [Source:MGI Symbol;Acc:MGI:1098258]	protein_coding;retained_intron;nonsense_mediated_decay;processed_transcript	0.894724	0.763309	1.19881	0.262091	0.576613	0.808929	1.73391	0.794026	0.0447707	up	no
ENSMUSG00000028180	Zranb2	zinc finger, RAN-binding domain containing 2 [Source:MGI Symbol;Acc:MGI:1858211]	protein_coding;retained_intron;nonsense_mediated_decay	9.54499	4.86733	8.89561	4.47592	4.8422	6.12964	1.50882	0.593424	0.0448267	up	no
ENSMUSG00000027208	Fgf7	fibroblast growth factor 7 [Source:MGI Symbol;Acc:MGI:95521]	protein_coding;processed_transcript	2.29233	2.31905	2.68232	0.609104	1.95573	1.59457	1.75354	0.810273	0.0448868	up	no
ENSMUSG00000027200	Sema6d	sema domain, transmembrane domain (TM), and cytoplasmic domain, (semaphorin) 6D [Source:MGI Symbol;Acc:MGI:2387661]	protein_coding;processed_transcript;retained_intron	0.501294	0.524858	0.56371	0.238325	0.414988	0.308901	1.65229	0.724471	0.0450121	up	no
ENSMUSG00000021706	Zfyve16	zinc finger, FYVE domain containing 16 [Source:MGI Symbol;Acc:MGI:2145181]	retained_intron;protein_coding;processed_transcript	4.81067	5.18906	5.28157	2.51197	3.17074	4.68773	1.47354	0.559291	0.045165	up	no
ENSMUSG00000022309	Angpt1	angiopoietin 1 [Source:MGI Symbol;Acc:MGI:108448]	protein_coding;processed_transcript	33.5576	36.7663	39.4792	11.2847	29.8667	30.556	1.53127	0.614726	0.0452484	up	no
ENSMUSG00000035623	Rsf1	remodeling and spacing factor 1 [Source:MGI Symbol;Acc:MGI:2682305]	protein_coding;nonsense_mediated_decay;retained_intron	1.80049	1.75892	1.95094	0.628405	1.15839	1.74458	1.5604	0.641916	0.0454223	up	no
ENSMUSG00000027386	Fbln7	fibulin 7 [Source:MGI Symbol;Acc:MGI:1917620]	protein_coding	4.55739	5.0698	5.06569	3.66979	3.06192	2.85906	1.53198	0.615398	0.0455614	up	no
ENSMUSG00000038816	Ctnnal1	catenin (cadherin associated protein), alpha-like 1 [Source:MGI Symbol;Acc:MGI:1859649]	protein_coding;processed_transcript	2.27737	1.98405	1.87997	0.978623	1.45045	1.62354	1.51541	0.599712	0.0457114	up	no
ENSMUSG00000094622	Gm3055	predicted gene 3055 [Source:MGI Symbol;Acc:MGI:3809197]	protein_coding	0.73283	0.872764	0.830914	0.229128	0.575029	0.539059	1.81394	0.859124	0.0460401	up	no
ENSMUSG00000071281	Zfp65	zinc finger protein 65 [Source:MGI Symbol;Acc:MGI:107769]	protein_coding	2.00425	1.82948	2.09626	0.768966	1.80557	0.271261	2.08377	1.0592	0.0462126	up	yes
ENSMUSG00000024511	Rab27b	RAB27B, member RAS oncogene family [Source:MGI Symbol;Acc:MGI:1931295]	protein_coding;retained_intron	0.853188	1.0229	0.965442	0.403585	0.253411	0.910911	1.81231	0.85783	0.047307	up	no
ENSMUSG00000022064	Pibf1	progesterone immunomodulatory binding factor 1 [Source:MGI Symbol;Acc:MGI:1261910]	protein_coding;retained_intron;processed_transcript	1.60138	1.43028	1.65106	0.457247	1.17234	1.25721	1.62212	0.697879	0.0478774	up	no
ENSMUSG00000005360	Slc1a3	solute carrier family 1 (glial high affinity glutamate transporter), member 3 [Source:MGI Symbol;Acc:MGI:99917]	protein_coding;retained_intron;processed_transcript	9.55922	4.33916	4.87765	1.90608	5.98837	3.10597	1.70685	0.771333	0.0479463	up	no
ENSMUSG00000078894	2210418O10Rik	RIKEN cDNA 2210418O10 gene [Source:MGI Symbol;Acc:MGI:1924208]	protein_coding	0.555742	0.729904	1.51012	0.0941906	0.415921	0.717172	2.27801	1.18778	0.0484891	up	yes
ENSMUSG00000025323	Sp4	trans-acting transcription factor 4 [Source:MGI Symbol;Acc:MGI:107595]	protein_coding	0.539042	0.911177	0.499062	0.333409	0.394761	0.382674	1.75477	0.811286	0.048516	up	no
ENSMUSG00000044757	Gm6430	predicted gene 6430 [Source:MGI Symbol;Acc:MGI:3648857]	processed_pseudogene	6.83025	0.692224	1.27797	0.747192	0.954333	1.66711	2.61247	1.38541	0.0488735	up	yes
ENSMUSG00000092595	Gm20427	predicted gene 20427 [Source:MGI Symbol;Acc:MGI:5141892]	retained_intron	10.0047	6.71144	8.25351	2.45598	7.76405	5.19248	1.62009	0.696074	0.0490792	up	no
ENSMUSG00000072066	6720489N17Rik	RIKEN cDNA 6720489N17 gene [Source:MGI Symbol;Acc:MGI:2443901]	protein_coding	0.682106	0.695161	0.607104	0.100115	0.432511	0.454546	2.01016	1.00731	0.0495344	up	yes
ENSMUSG00000025950	Idh1	isocitrate dehydrogenase 1 (NADP+), soluble [Source:MGI Symbol;Acc:MGI:96413]	protein_coding	41.804	39.2166	39.9343	17.0996	34.0245	33.2643	1.43331	0.519353	0.0496069	up	no
ENSMUSG00000087370	Tmem170b	transmembrane protein 170B [Source:MGI Symbol;Acc:MGI:3647046]	protein_coding	0.0420276	0.0381018	0.0233603	0.985785	1.27919	1.36186	0.0285344	-5.13115	5.6401e-34	down	yes
ENSMUSG00000079018	Ly6c1	lymphocyte antigen 6 complex, locus C1 [Source:MGI Symbol;Acc:MGI:96882]	protein_coding	10.7716	7.50131	10.9196	37.6095	39.0135	45.3308	0.239374	-2.06266	3.68388e-18	down	yes
ENSMUSG00000084323	Gm14438	predicted gene 14438 [Source:MGI Symbol;Acc:MGI:3652091]	processed_pseudogene	1.31732	0.834039	0.979542	20.7467	16.0885	4.8282	0.0751476	-3.73413	1.32863e-12	down	yes
ENSMUSG00000073640	Rpl27-ps3	ribosomal protein L27, pseudogene 3 [Source:MGI Symbol;Acc:MGI:3646174]	processed_pseudogene	18.2214	16.7895	12.5167	37.9517	38.9596	53.0061	0.365829	-1.45076	2.81507e-07	down	yes
[truncated: 237 more rows]

[truncated: 2 more sheets: Supplementary Data S3, Supplementary Data S4]
